# Supplementary material for: Initial Transcriptomic Response and Adaption of Listeria monocytogenes to Desiccation on Food Grade Stainless Steel
Source: Front Microbiol. 2020 Jan 22;10:3132. doi: 10.3389/fmicb.2019.03132 (PMC6987299; doi:10.3389/fmicb.2019.03132)
Supplement: Supplementary file 5 [file Table_1.xlsx]

## Sheet: Normalized gene counts
	Table S1. Normalized gene counts for biological replicates
								TPM Normalized gene counts (Lm 568) Replicates H and P										TPM Normalized gene counts (Lm 08 5578) Replicates H and P										TPM Normalized gene counts (Lm 568) Antisense transcripts. Replicates H and P										TPM Normalized gene counts (Lm 08 5578) Antisense transcripts. Replicates H and P
	EGD-e ORF	Gene description	Gene abbr.	Strand	Identifier	Functional Category	Length (bp)	568 - 0 h (H)	568 - 0 h (P)	568 - 6 h (H)	568 - 6 h (P)	568 - 12 h (H)	568 - 12 h (P)	568 - 24 h (H)	568 - 24 h (P)	568 - 48 h (H)	568 - 48 h (P)	08-5578 - 0 h (H)	08-5578 - 0 h (P)	08-5578 - 6 h (H)	08-5578 - 6 h (P)	08-5578 - 12 h (H)	08-5578 - 12 h (P)	08-5578 - 24 h (H)	08-5578 - 24 h (P)	08-5578 - 48 h (H)	08-5578 - 48 h (P)	568 - 0h - As (H)	568 - 0h - As (P)	568 - 6h - As (H)	568 - 6h - As (P)	568 - 12h - As (H)	568 - 12h - As (P)	568 - 24h - As (H)	568 - 24h - As (P)	568 - 48h - As (H)	568 - 48h - As (P)	08-5578 - 0h - As (H)	08-5578 - 0h - As (P)	08-5578 - 6h - As (H)	08-5578 - 6h - As (P)	08-5578 - 12h - As (H)	08-5578 - 12h - As (P)	08-5578 - 24h - As (H)	08-5578 - 24h - As (P)	08-5578 - 48h - As (H)	08-5578 - 48h - As (P)
	lmo0001	chromosome replication initiator DnaA	dnaA	+	984365	3.1	1355	290.458	288.886	356.223	281.735	333.989	267.819	320.416	280.19	329.821	277.028	324.848	287.584	304.856	253.579	319.074	235.593	268.541	247.896	287.203	222.133	21.3762	12.8767	27.4844	11.7076	11.3944	22.1227	19.0563	6.67314	19.3551	6.51009	25.3721	11.4404	51.9967	16.4371	44.1057	12.6395	45.7953	15.026	44.6596	10.6838
	lmo0002	DNA polymerase III subunit beta	dnaN	+	984379	3.1	1145	293.591	311.184	453.298	346.637	340.539	270.24	361.089	281.989	351.909	278.694	351.4	360.011	368.582	246.531	371.752	257.119	296.34	290.766	336.215	238.098	21.4993	6.52987	33.8216	9.89501	5.99219	22.566	14.241	9.11073	20.9104	5.13536	13.7241	14.2137	57.8333	6.25151	42.3411	10.1698	35.3394	14.5883	27.3327	10.2336
	lmo0003	hypothetical protein	lmo0003	+	984420	5.2	1343	10.9753	8.55935	15.2726	13.3728	13.8599	13.3743	16.7475	14.4346	12.094	14.1347	7.05504	7.48717	11.1915	10.1723	14.0121	11.3095	12.6095	11.7039	15.1402	9.92239	16.1753	12.9917	21.0746	9.28098	8.30279	29.2472	16.1907	8.80433	25.4712	9.85232	10.2395	8.0798	35.6734	10.6611	36.1034	13.7726	17.0755	9.71807	32.6285	11.2925
	lmo0004	hypothetical protein	lmo0004	+	984453	5.2	221	1414.87	1245.97	892.449	586.479	902.47	647.163	793.62	550.212	913.491	638.152	833.19	948.153	635.646	450.839	641.477	416.992	601.082	426.08	619.552	475.603	0	0	13.4302	15.3239	0	0	0	6.27081	5.14013	3.31369	13.2836	0	25.4081	3.5857	35.5815	15.4407	12.1618	4.7067	23.516	6.21501
	lmo0005	recombination protein F	recF	+	984623	3.3	1112	1261.1	868.517	606.927	441.916	665.675	525.731	609.338	482.891	656.053	446.779	712.676	594.081	495.133	355.412	487.304	336.868	462.423	317.279	471.001	371.226	7.81297	3.36174	10.7152	6.11303	9.25478	23.2351	10.9974	9.38086	28.7072	4.62667	11.4814	7.66601	24.0726	10.0129	34.4717	12.3193	18.1936	14.082	23.4526	8.05774
	lmo0006	DNA gyrase subunit B	gyrB	+	984708	3.4	1940	1044	682.59	490.211	322.448	557.989	370.565	495.587	335.808	550.18	311.756	741.313	524.272	458.782	295.465	470.764	242.163	438.265	257.65	438.269	296.627	20.1604	17.3491	24.5771	12.8528	11.9404	20.2515	27.3265	12.9099	30.5707	7.20101	21.7767	16.3844	44.3169	17.6348	48.2538	20.4858	46.5985	15.3422	37.1168	24.5238
	lmo0007	DNA gyrase subunit A	gyrA	+	984791	3.4	2528	1748.84	1170.42	924.12	659.587	916.006	727.017	835.926	660.817	931.194	623.887	1240.88	880.455	713.308	536.666	737.892	451.251	677.978	472.595	697.573	559.087	17.1922	13.3153	24.7575	6.72579	8.48538	15.952	18.8219	8.53217	21.2069	9.30822	27.2081	20.856	26.7644	16.3675	37.0346	12.7409	24.5545	17.766	33.4413	18.822
	lmo0008	cardiolipin synthase	lmo0008	+	984834	2.4	1514	227.904	192.551	125.669	89.8628	116.293	91.294	116.051	87.9674	116.176	85.7893	196.276	189.468	117.941	76.237	115.348	76.1533	92.4565	72.6526	102.393	73.1368	10.523	10.7021	15.7439	9.73042	10.1986	19.8009	11.6701	3.67556	12.0513	6.79799	37.6326	36.3511	28.8545	17.8646	51.3943	19.0058	32.9694	23.4496	34.4591	28.6875
	lmo0009	spermidine acetyltransferase	lmo0009	+	984861	2.2	518	142.108	163.262	203.337	127.75	133.121	83.7516	140.986	84.9173	138.85	87.9119	158.651	246.777	205.811	79.1508	173.711	106.573	141.403	102.533	144.364	81.777	2.7925	4.80618	34.4683	10.9245	4.96174	25.9105	7.86137	8.04694	39.5761	11.3393	18.94	20.9234	32.6046	10.7364	39.1367	6.60469	10.4044	10.0663	10.0589	3.98767
	lmo0010	mevalonate kinase	lmo0010	+	984924	2.1.1	968	88.7468	86.7349	125.64	127.572	121.65	101.25	127.494	104.674	126.563	106.073	75.6923	83.9976	106.634	78.1983	94.7675	82.7887	98.1681	74.1724	91.581	69.6493	5.98269	9.00973	12.3076	9.36196	6.2009	20.2829	8.42116	9.33826	23.5523	8.35092	11.1588	8.00476	14.5526	13.9654	29.1135	9.19749	18.111	13.4789	24.7828	5.69549
	lmo0011	mevalonate diphosphate decarboxylase	lmo0011	+	984930	2.4	971	119.528	105.103	158.535	147.708	185.531	145.522	196.496	152.567	177.704	145.636	108.741	101.954	175.455	136.209	170.067	129.936	173.595	126.367	166.056	123.18	4.47317	6.41566	13.8033	4.66653	4.41554	7.44957	19.5887	2.86444	8.21787	1.51366	11.1244	5.58604	33.3677	8.18957	27.8627	10.5797	26.3882	14.5123	32.2256	8.51687
	lmo0012	mevalonate kinase	lmo0012	+	984932	2.4	1079	137.004	96.4211	209.822	136.213	236.877	140.412	226.2	148.098	209.154	142.73	140.861	124.31	207.496	139.666	202.771	144.308	193.145	129.999	195.274	135.88	6.70975	0	12.4229	2.09994	3.97399	6.70461	6.29638	2.578	6.3395	2.72459	0.910174	5.74564	18.2797	8.10767	11.4934	3.17392	9.99974	3.38621	13.5348	3.19383
	lmo0013	AA3-600 quinol oxidase subunit II	qoxA	+	984936	1.4	1106	58.4515	83.3673	415.388	261.243	440.58	246.34	436.664	233.682	385.04	217.102	43.6461	83.7096	576.257	322.793	508.578	358.05	473.316	277.315	500.673	262.304	2.61844	3.37996	2.69332	0	0.775412	14.0166	7.37137	3.77268	5.15406	3.98721	7.1038	4.90481	15.2862	5.75267	15.2905	6.81232	10.9753	7.07918	11.3183	2.49274
	lmo0014	AA3-600 quinol oxidase subunit I	qoxB	+	984962	1.4	1979	89.9748	158.17	511.543	345.223	594.33	385.648	567.698	363.114	518.803	371.82	90.4604	188.653	688.105	512.066	713.857	547.237	719.192	474.81	730.239	483.646	5.12381	3.77941	14.3052	2.29084	5.20231	12.0161	7.55565	2.46082	13.2553	4.45842	4.96459	2.35049	9.25856	6.83457	16.5277	10.0411	22.4994	5.54106	14.2379	5.57468
	lmo0015	AA3-600 quinol oxidase subunit III	qoxC	+	984980	1.4	611	136.292	281.394	926.839	666.901	906.619	712.703	936.125	647.688	830.975	667.606	128.732	343.626	1114.18	785.56	1058.06	874.542	977.626	768.485	1051.35	775.831	2.36815	4.07583	17.0511	1.85289	4.20775	8.45119	4.4445	3.41206	5.59368	1.20203	4.81857	1.26742	6.9125	2.60139	12.907	2.24042	8.8233	4.26833	17.0606	9.01786
	lmo0016	quinol oxidase aa3-600 subunit IV	qoxD	+	984983	1.4	332	100.695	226.61	781.228	516.569	782.279	501.321	685.184	445.489	674.565	534.512	104.267	310.791	818.288	590.855	802.699	637.455	794.14	632.932	829.653	603.667	0	0	4.47674	0	0	0	0	2.09027	0	0	0	0	4.23468	2.39047	6.77742	0	0	1.5689	6.27093	2.07167
	lmo0017	CapA protein (polyglutamate capsule biosynthesis)	lmo0017	-	984984	1.1	1118	1.83463	1.76455	1.86093	1.2647	1.70075	0.99302	1.70355	1.08356	1.49621	1.09528	3.92528	3.24418	6.10403	4.09177	5.82356	4.1977	6.71642	4.29943	4.77063	3.21255	36.265	74.6762	675.435	249.29	191.007	443.721	512.893	171.06	399.745	155.806	30.7458	101.896	733.429	219.103	646.408	231.586	563.39	218.035	526.254	205.912
	lmo0018	beta-glucosidase	lmo0018	+	984990	2.1.1	1433	18.0278	15.8048	34.696	24.9683	31.0071	27.896	31.9553	30.1822	31.1832	29.6808	19.1561	15.7666	29.9979	20.4169	31.2683	21.0154	28.7744	21.2094	31.4458	23.0469	2.02135	2.60921	1.03958	3.16309	2.39437	4.32814	0.948408	2.91238	2.38726	2.05199	14.3952	11.9	198.64	101.585	191.221	98.0065	187.338	95.4534	175.475	69.7564
	lmo0019	lmo0019	lmo0019	-	985005	5.2	821	3.885	1.77547	2.08093	1.9799	3.36764	1.59037	3.74619	1.66747	2.88549	0.948827	8.99071	7.98041	207.03	95.1638	169.609	123.469	209.755	116.599	189.099	79.495	0	0	10.8814	4.13857	2.08852	5.0337	4.96357	1.69358	4.16463	3.57976	0	0	10.2931	1.9368	4.1184	0.834023	1.64229	0.635576	7.62124	3.35701
	lmo0020	GntR family transcriptional regulator	lmo0020	+	985023	3.5.2	740	4.92535	6.48791	10.1369	8.02137	4.82536	4.76337	9.99344	5.26466	4.70721	4.05982	8.46806	11.861	8.92364	4.09037	5.88975	4.77208	5.86681	5.30705	5.9329	2.89515	0	1.68314	4.02363	7.6516	1.15841	8.37592	1.83538	1.8787	4.61988	0	3.97971	5.23388	11.4182	3.22278	9.13717	0.925192	1.82182	3.52526	2.81811	0
	lmo0021	PTS fructose transporter subunit IIA	lmo0021	+	985040	1.2	401	3.5937	2.98977	2.59003	3.16835	2.72573	2.27636	3.10052	2.75391	3.64423	3.18737	3.29524	2.69329	3.97663	1.44377	2.52822	2.49447	2.38279	1.66509	2.65589	2.59618	0	0	7.41668	0	2.13528	2.5732	0	0	0	0	4.89049	0	0	0	2.80707	1.70539	6.71624	2.59922	10.3892	0
	lmo0022	PTS fructose transporter subunit IIB	lmo0022	+	985051	1.2	488	0	0.17556	0.152087	0.289407	0.117936	0	0.149935	0	0.14266	0.113926	0.427732	0	0.297194	0.131879	0.366779	0.10793	0.301362	0.256658	0.128433	0.118571	2.96382	0	3.04857	0	0	0	0	1.42344	2.33356	1.50438	0	0	5.76748	4.88359	0	0	0	1.06839	0	1.41077
	lmo0023	PTS fructose transporter subunit IIC	lmo0023	+	985053	1.2	803	0.472855	0.106777	0.0925009	0.0880099	0.21519	0	0.182384	0.0655694	0.433836	0.138581	0.346868	0.475286	0.542268	0.481258	0.743594	0.393864	0.64152	0.104068	0.781144	0.288464	0	0	5.56251	0	1.06764	11.5794	5.07469	1.73149	2.83858	0.914975	9.78098	0.964752	12.2774	6.93057	14.0353	4.26348	8.39531	6.49805	12.9864	4.29021
	lmo0024	PTS mannose transporter subunit IID	lmo0024	+	985058	1.2	827	0.18366	0.103682	0.0898197	0	0.487555	0.157884	0.177097	0.0636688	0.252757	0	0.168407	0.307673	0.263275	0.233654	0.794245	0.382448	0.355957	0.151577	0.530951	0.420154	0	0	12.603	0	6.22015	7.49584	13.1403	0.840652	8.26891	4.44227	2.37437	1.87358	17.0308	2.88415	20.4428	3.31192	9.78236	5.67873	10.088	3.33269
	lmo0025	phosphoheptose isomerase	lmo0025	+	985061	2.1.1	704	1.72562	0.974173	0.843923	1.00369	1.71785	0.834435	1.35197	0.598216	1.97903	0.86923	2.37346	1.8971	6.28723	4.93955	5.59689	3.81797	4.70318	4.62859	6.59219	3.20747	16.446	3.53817	8.45817	1.60846	1.21756	7.33635	3.85821	0.987319	12.9488	4.17384	6.97155	2.20046	8.00085	4.51646	16.0063	2.91731	0	1.48211	5.92403	4.89267
	lmo0026	copper homeostasis protein CutC	lmo0026	+	985069	4.2	641	0.473739	0.534885	0.463369	0.220436	0.26949	0.203626	0.114203	0.32846	0.434647	0.173551	1.95478	0.694421	1.58457	0.803596	1.2106	0.822084	1.49203	0.32582	1.66303	0.903135	29.3473	9.71343	13.9323	12.3641	8.02225	25.7801	21.1841	9.75785	8.88715	4.58343	22.967	13.2901	10.9825	8.67941	17.577	8.54289	2.10275	4.06887	13.0107	8.59646
	lmo0027	PTS beta-glucoside transporter subunit IIABC	lmo0027	+	985074	1.2	1904	3.8716	3.7404	1.36639	0.557165	1.75586	0.651925	1.11613	0.830201	1.0986	0.789587	9.14966	8.99326	1.94533	1.38794	2.35374	1.08049	1.89526	1.29569	2.20885	1.55225	14.455	1.9641	6.26038	3.57155	3.15416	13.0321	5.71136	3.65386	9.58412	5.40628	15.9961	5.7004	11.8438	4.59647	13.6242	8.27719	13.4642	6.03347	15.8946	4.34561
	lmo0028	microcin C7 self-immunity protein MccF	lmo0028	+	985088	4.5	875	0.173596	0.294003	0.764083	0.403881	0.395005	0.223849	0.669573	0.421261	0.159271	0.127191	1.83056	1.81759	1.65899	0.809788	0.88722	0.662735	1.85049	0.620844	0.932022	0.728075	1.65446	1.42375	6.80709	0	0	3.54255	0	0	1.30264	0.839772	4.48853	7.96912	3.21952	2.72612	1.28817	2.34783	3.08211	0.596396	2.38381	0
	lmo0029	lmo0029	lmo0029	+	985092	5.2	338	33.4195	32.6682	61.4272	29.0137	74.1725	31.6215	60.3416	33.4346	55.5618	34.8391	50.5935	48.4708	108.674	23.9692	91.5292	35.1852	116.937	32.8265	87.8144	36.9438	17.101	11.0372	30.7825	20.0702	17.7247	18.3084	16.0474	26.6926	26.9288	26.0404	11.5987	9.15234	12.4792	2.34816	9.9862	8.08929	7.9644	7.70565	12.3199	10.175
	lmo0030	hypothetical protein	lmo0030	-	985106	5.2	809	70.2151	65.3936	59.2211	70.6726	60.3763	66.8973	66.62	61.9597	62.1819	59.6988	71.2697	52.4446	29.873	32.722	30.9996	26.0631	26.9262	30.0595	28.223	29.277	55.4673	56.9711	139.873	81.1977	52.9865	158.357	85.6307	39.5293	114.111	53.5837	55.824	76.6085	147.979	27.5169	136.527	44.8581	99.9974	47.7294	116.012	48.5461
	lmo0031	LacI family transcription regulator	lmo0031	-	985116	3.5.2	1055	72.6509	70.7278	88.7378	100.645	77.4951	89.3804	93.8001	81.3232	81.1235	76.1261	60.5432	66.1008	34.6805	27.9695	29.666	29.1378	29.5151	30.7822	30.0341	28.2219	42.5459	25.9834	94.5838	35.4365	23.573	54.8559	51.5158	24.3885	47.5462	15.3258	28.8567	27.912	66.7684	12.061	52.3614	17.5287	51.135	21.2737	43.5046	18.9452
	lmo0032	xylose repressor	lmo0032	+	985121	3.5.2	965	0.314845	0.177741	0.46193	0	0.477605	0	0.531292	0	0.288865	0	0.433046	0.19779	0.52655	0.267034	0.433225	0.546354	0.457659	0.173231	0.715159	0.240088	3.00063	0	3.08645	2.34776	3.55437	4.28334	1.40789	1.44112	3.54382	6.09226	5.08793	3.21185	16.0576	5.7683	16.3542	4.96788	11.1798	4.86748	8.64688	4.99903
	lmo0033	endoglucanase	lmo0033	+	985131	2.1.1	2402	0.316417	0.50016	0.618982	0.176679	0.623987	0.27201	0.671245	0.153568	0.696738	0.324568	0.464222	0.450562	1.75385	0.536734	1.54252	0.417303	1.01188	0.45265	1.35905	0.482574	12.0625	7.26628	20.4723	6.13466	5.00097	12.4837	10.7534	6.37258	13.2963	3.06134	11.4539	10.9748	18.7785	5.96274	20.6623	8.55889	20.2242	8.04428	20.4216	9.18673
	lmo0034	PTS cellbiose transporter subunit IIC	lmo0034	+	985136	1.2	1352	1.12395	0.444156	1.70399	1.30746	1.4066	0.579726	1.78825	0.350673	1.08276	0.370575	1.28826	0.894367	2.47047	1.76355	2.16516	1.01421	2.72295	1.48418	2.0424	1.28562	19.2812	11.9835	11.0181	9.21925	6.97871	12.2327	14.0726	6.17348	16.8678	9.78679	21.0692	14.3322	23.9715	4.11839	22.5188	7.09382	7.98206	9.65342	20.0642	10.7075
	lmo0035	glucosamine--fructose-6-phosphate aminotransferase	lmo0035	+	985145	2.1.1	1085	4.83096	2.29247	5.41003	2.21532	4.83245	2.28714	5.06341	2.23298	4.23961	2.30841	3.46676	3.28411	8.43062	5.04745	7.10153	4.27666	7.87039	5.39314	7.17098	4.59152	32.0289	11.4844	23.3359	9.39752	5.53284	17.1452	11.2709	8.33221	11.5582	6.09646	28.0595	16.4274	16.8802	6.5969	33.2506	6.94405	22.3751	14.9132	25.9585	6.35236
	lmo0036	putrescine carbamoyltransferase	lmo0036	+	985152	2.2	1025	1.40806	1.75714	1.01481	0.965535	0.674512	0.573369	1.35775	0.719346	0.951903	0.597278	1.15521	1.36564	4.67429	1.31994	3.32139	0.771606	2.15448	1.63101	3.30547	1.29977	5.65031	3.6468	15.9827	6.63139	5.8564	14.115	6.62777	2.03526	12.2341	7.16998	8.62271	3.02402	17.8674	3.87927	20.8971	5.34555	18.4206	7.12886	19.3354	4.70669
	lmo0037	amino acid transporter	lmo0037	+	985153	1.2	1385	0.713172	0.619401	1.77073	0.357373	0.998628	0.235801	1.32248	0.19018	1.50998	0.321557	1.20728	1.10283	5.29514	1.48891	4.83111	1.33277	4.62513	1.99216	4.62194	1.08767	7.31973	1.79972	4.30232	1.63632	0.619323	2.98536	3.92501	1.00442	4.11656	1.06153	7.8015	1.11928	5.08712	4.02033	15.4692	1.97855	8.76601	1.88472	9.79324	0.497739
	lmo0038	agmatine deiminase 1	lmo0038	+	985162	5.2	1091	2.64591	0.314465	1.70263	0.583186	1.68999	0.897858	2.01424	0.627593	2.04428	0.612195	1.59616	0.933162	4.52486	2.59844	4.21561	2.41657	4.25095	1.87723	5.17615	1.4867	6.63601	3.42639	2.73032	1.03843	0.786063	8.52549	2.49087	1.27483	8.35978	4.04198	2.70052	2.13094	14.2048	2.91585	11.3671	3.76685	16.071	5.26271	9.56145	6.9492
	lmo0039	carbamate kinase	lmo0039	+	985163	2.2	941	7.66808	3.9188	4.81594	3.1549	5.57117	3.6776	4.82562	3.13397	3.85092	2.60215	4.14474	3.11005	11.2621	5.88749	10.0911	5.3226	10.7161	6.70609	12.8675	5.60116	9.23125	2.64799	15.8254	6.01894	6.37863	16.4717	8.66253	5.17242	6.05685	10.1521	10.4351	4.94052	23.9516	6.7603	23.9584	5.82223	21.4963	9.42838	19.9512	5.85874
	lmo0040	agmatine deiminase	lmo0040	+	985194	5.2	1109	10.686	6.80604	9.31309	8.79718	7.84531	6.18309	10.106	6.03167	7.66741	6.32381	8.16545	5.79506	10.2122	4.76402	9.15626	5.42042	8.76232	4.52274	8.20412	4.23106	10.4454	7.86525	14.7732	4.08637	5.41321	12.1149	13.4777	4.38957	12.3363	3.97643	11.5125	8.38552	6.35202	3.5857	13.216	5.55865	4.86474	4.23603	11.2877	3.10751
	lmo0041	hypothetical protein	lmo0041	+	985277	3.5.2	779	6.04381	6.4937	13.0626	7.80174	8.57668	6.53641	9.58777	6.15041	8.58596	5.71382	8.58097	9.71655	13.6012	4.54727	9.65758	5.00713	9.63548	5.89985	9.17904	3.49374	3.71617	14.3908	28.6683	5.81522	3.30147	14.5881	13.9489	3.56954	8.77777	3.77251	28.9856	29.8331	12.6552	6.12328	26.0409	3.51573	6.9229	2.6792	17.4018	8.84444
	lmo0042	DedA protein	lmo0042	+	985331	5.2	659	171.655	271.725	226.042	135.302	197.217	109.237	142.526	92.8951	192.054	105.342	216.556	330.986	107.455	72.4031	120.657	64.6928	80.9398	78.8533	101.628	103.576	41.7224	15.1176	18.0697	6.87253	7.80347	20.3751	18.5457	2.10927	27.6633	5.57303	43.1919	32.9068	17.0927	6.0305	27.3561	4.15495	20.454	7.91581	12.6559	8.36202
	lmo0043	arginine deiminase	lmo0043	+	985417	2.2	1232	19.6717	15.2481	17.5522	10.3873	19.3171	11.4506	14.628	10.3041	18.9537	8.99127	13.6274	9.76244	385.95	227.201	373.45	272.921	396.144	264.278	406.163	197.973	41.1401	26.2995	29.0171	13.7952	9.74642	18.4569	17.6482	6.20978	15.7331	8.35277	35.8755	37.116	16.0114	10.9752	24.7104	10.0083	21.8972	8.05063	25.4041	7.27353
	lmo0044	30S ribosomal protein S6	rpsF	+	985454	3.7.1	293	7779.37	6783.82	6682.49	4070.38	5813.57	4892.08	5774.19	3725.75	5272.41	4139.95	7541.9	7204.36	4870.46	5759.45	5083.96	3805.93	4291.92	4071.26	4594.73	5313.96	19.7184	16.9688	40.5647	0	8.75899	14.0738	9.25182	7.10265	15.5253	22.5196	16.7175	13.1915	28.7786	8.12271	49.897	6.99558	13.7752	7.10807	35.514	16.4254
	lmo0045	single-strand binding protein	ssb	+	985468	3.1	536	4488.76	2840.85	2972.89	2007.9	3185.85	2744.56	2953.76	2631.96	2988.55	2626.76	4301.5	3470.95	2739.17	3982.44	2896.18	2898.95	2475.86	2678.71	2883.48	3608.23	16.1934	9.29016	8.32823	6.33501	1.59848	19.263	2.53262	5.1848	16.9998	8.21944	10.9831	11.5555	15.7559	10.3765	16.811	14.0433	17.5973	11.6747	17.4991	6.42334
	lmo0046	30S ribosomal protein S18	rpsR	+	985537	3.7.1	239	1563.79	1115.68	1325.35	889.806	1493.91	1030.57	1190.81	1034.37	1433.01	1188.94	1669.51	1375.93	1067.55	1260.21	1057.2	1157.81	981.828	1122.06	1199.29	1292.98	0	10.3934	6.21147	0	7.15318	0	17.0002	0	0	6.13033	4.09578	0	17.6269	0	9.40367	0	11.2497	2.17685	13.0514	2.87444
	lmo0047	lmo0047	lmo0047	+	985583	5.2	611	767.308	934.379	722.32	560.298	1359.79	464.597	576.123	381.515	727.36	429.11	237.3	305.85	174.417	159.746	186.975	147.295	155.674	135.35	139.77	299.191	2.36815	4.07583	4.87174	5.55866	1.40258	5.07071	2.22225	1.13735	7.45823	0	4.81857	2.53484	2.30417	3.90209	1.84386	1.12021	2.20583	0.853665	1.70606	3.3817
	lmo0048	sensor histidine kinase AgrB	lmo0048	+	985598	1.3	614	4201.22	6134.64	8779.25	12078.9	7115.92	9592.25	10017.4	10783.7	8406.02	9760.98	6557.23	5944.24	6795.32	6721.71	6773.69	8624.5	6675.09	7705.18	6353	6886.76	11.783	6.08392	26.6639	14.7508	15.3532	20.1839	6.63423	10.1862	27.8319	9.5693	7.99178	8.82866	18.3434	7.76611	25.6881	13.3769	13.1704	8.49501	32.2571	3.3652
	lmo0049	lmo0049	lmo0049	+	985690	6	161	712.007	1536.27	4999.37	2623.8	1714.1	1564.7	2532.65	1534.67	2056.65	1624.18	1229.57	2034.49	3018.24	904.831	2278.84	1390.79	1593.28	1490.84	1770.53	977.45	35.7853	23.0964	27.6065	62.9982	26.4932	25.5414	58.7662	38.67	7.04389	22.7049	12.1357	9.57606	0	19.655	48.7598	16.9276	24.9994	16.1248	12.8903	0
	lmo0050	histidine kinase	agrC	+	985694	1.3	1295	238.783	229.924	611.665	353.035	352.344	310.933	384.864	300.565	386.861	264.148	305.457	274.459	366.235	212.375	324.435	208.138	259.199	218.312	262.749	220.651	2.23658	7.69879	9.20218	1.74995	2.64932	7.18351	4.19759	1.07417	7.92437	3.40574	4.55087	7.78055	22.8496	4.29952	13.9314	1.05797	13.5413	2.82184	16.9185	3.19383
	lmo0051	response regulator	agrA	+	985847	3.5.2	728	406.251	452.562	939.275	750.89	763.485	620.555	768.987	613.45	829.571	582.316	637.717	482.773	635.336	475.216	622.699	434.747	520.128	484.636	552.744	494.392	0	1.71084	14.3145	6.22204	4.70991	8.51379	16.7903	0.954815	9.39185	3.02733	2.69681	5.32003	17.4093	4.36777	17.0272	3.76168	1.8518	2.14997	5.729	1.89264
	lmo0052	hypothetical protein	lmo0052	+	986050	5.2	1973	102.613	57.5806	103.569	64.4869	121.009	56.8873	122.977	56.5902	102.874	51.3071	96.7044	66.7856	105.241	53.0871	101.58	55.7188	93.6903	46.4342	96.5921	44.5287	7.34197	3.79089	9.81752	1.72336	3.91359	18.3409	8.95655	5.28921	13.2956	1.49066	7.96748	2.75057	20.0021	8.46836	18.8645	4.86218	21.2001	4.76392	23.8019	5.24215
	lmo0053	50S ribosomal protein L9	rplI	+	986067	3.7.1	446	114.308	78.935	163.715	87.2231	142.951	64.7791	141.716	71.2339	108.465	62.0659	100.759	76.2265	129.56	53.5241	119.302	57.3826	101.211	53.815	109.731	49.8094	6.48459	0	16.6751	2.53684	1.92032	2.31415	6.08509	0	10.2113	0	6.59724	5.20578	15.7735	0	15.1469	3.06741	6.04011	2.33755	7.00745	0
	lmo0054	replicative DNA helicase	dnaC	+	986068	3.1	1352	195.342	93.5265	232.292	136.813	241.638	146.381	246.833	149.62	212.222	145.306	199.989	110.195	185.016	115.679	178.427	122.251	172.799	106.861	184.606	113.348	42.8472	25.8106	22.0363	4.19057	7.61314	30.5817	22.1141	10.2891	21.0848	5.4371	19.6162	22.9316	14.5913	12.3552	35.0292	13.6809	26.9394	6.95046	21.6076	9.6877
	lmo0055	adenylosuccinate synthetase	purA	+	986069	2.3	1292	216.756	153.771	167.607	129.097	168.285	125.066	170.452	138.624	157.056	131.411	259.146	244.262	165.672	152.867	168.628	168.293	151.754	140.001	163.009	140.536	42.5937	21.2208	17.2941	14.0321	11.2858	24.0006	18.933	10.2283	15.8855	7.39623	25.8481	16.1971	21.8121	12.9285	28.8001	11.1345	16.7049	8.48516	29.0704	5.86893
	lmo0056	heat shock protein	lmo0056	+	986070	5.2	293	43.9659	63.6567	42.7505	51.5055	44.9204	56.9156	52.3702	50.2074	52.202	61.2049	47.666	41.3757	27.9287	27.4186	31.7227	34.2876	36.3403	36.0011	27.9841	38.8514	9.85922	4.24219	10.1412	7.71407	2.91966	24.6292	13.8777	0	11.644	0	20.061	7.91491	19.1857	8.12271	3.83823	2.33186	4.59172	1.77702	7.10279	11.7324
	lmo0057	hypothetical protein	lmo0057	+	986071	5.2	3206	1.18545	0.910154	1.06675	0.485413	0.557466	0.713359	0.685858	0.427397	0.913613	0.416911	1.06526	0.754648	0.861001	0.402174	1.08124	0.362056	0.942004	0.404395	0.92042	0.542388	17.1729	10.5003	37.6523	7.07183	7.22678	23.5463	25.8687	7.16245	26.3306	6.88157	16.8582	16.6887	44.8504	11.1697	43.2798	10.2611	33.6755	10.9148	34.8362	7.31383
	lmo0058	lmo0058	lmo0058	+	986073	6	515	1.32619	0.332748	0.720647	0.548527	0.558825	0.253349	0.710448	0.612997	0.540782	0	0.945819	0.370281	0.985751	0.124978	0.811037	1.02283	1.42797	0.486457	0.730278	0.449467	5.61746	0	14.4453	0	1.66353	6.0141	21.0855	1.34895	19.9031	2.85132	1.90502	1.50322	21.8628	4.62806	15.3083	9.30033	26.1621	6.07492	22.2582	2.6739
	lmo0059	hypothetical protein	lmo0059	+	986184	5.2	251	0	0	0	0	0.686557	0	0.581891	0.209198	0.830487	0	0.553336	1.26366	1.73009	0.255907	1.66069	0	0.584787	0.49804	1.49533	0.460169	0	0	17.7471	0	6.81255	8.20973	10.7938	2.76214	0	5.83841	3.90075	0	5.59583	3.15883	4.47794	5.44101	10.714	4.14638	8.28659	5.47513
	lmo0060	hypothetical protein	lmo0060	+	986285	5.2	1196	1.20691	1.00408	1.05623	0.650258	1.49356	0.327639	1.40879	0.308291	0.874197	0.232706	1.22316	1.06413	2.3675	0.969753	1.09881	0.925927	1.53891	0.943654	1.6265	0.726582	14.5294	7.29359	16.1903	5.68405	3.58555	11.2344	11.3619	5.81504	12.393	6.1457	10.6757	10.3681	30.6298	3.32509	23.5681	6.87285	18.0446	4.36461	22.6791	6.33962
	lmo0061	hypothetical protein	lmo0061	+	986287	5.2	4496	1.11593	0.973604	0.909582	0.676601	1.09006	0.697682	0.945621	0.738541	1.02384	0.681351	1.20929	1.03386	1.51888	0.975145	1.28956	0.974107	1.65488	0.986112	0.907773	0.941212	11.9245	5.54683	13.923	6.30402	5.91724	17.0219	11.7947	5.88176	14.9712	7.68848	11.5851	7.24433	18.501	5.6644	18.569	5.64065	16.2104	8.48084	16.0204	6.28964
	lmo0062	lmo0062	lmo0062	+	986293	6	395	0	0	0	0	0	0	0	0	0	0	0	0	0	0	0	0	0	0	0	0	0	0	0	0	0	0	0	0	0	0	0	0	0	0	0	0	0	0	0	0
	lmo0063	lmo0063	lmo0063	+	986361	6	299	0	0	0	0	0	0	0	0	0	0	0	0	0	0	0	0	0	0	0	0	0	0	0	0	0	0	0	0	0	0	0	0	0	0	0	0	0	0	0	0
	lmo0064	lmo0064	lmo0064	+	986373	6	701	0	0	0	0	0	0	0	0	0	0	0	0	0	0	0	0	0	0	0	0	0	0	0	0	0	0	0	0	0	0	0	0	0	0	0	0	0	0	0	0
	lmo0065	lmo0065	lmo0065	+	986383	6	332	0	0	0	0	0	0	0	0	0	0	0	0	0	0	0	0	0	0	0	0	0	0	0	0	0	0	0	0	0	0	0	0	0	0	0	0	0	0	0	0
	lmo0066	toxin	lmo0066	+	986392	4.5	1814	0	0	0	0	0	0	0	0	0	0	0	0	0	0	0	0	0	0	0	0	0	0	0	0	0	0	0	0	0	0	0	0	0	0	0	0	0	0	0	0
	lmo0067	dinitrogenase reductase ADP-ribosylation protein	lmo0067	+	986401	3.8	989	0	0	0	0	0	0	0	0	0	0	0	0	0	0	0	0	0	0	0	0	0	0	0	0	0	0	0	0	0	0	0	0	0	0	0	0	0	0	0	0
	lmo0068	lmo0068	lmo0068	+	986408	6	323	0	0	0	0	0	0	0	0	0	0	0	0	0	0	0	0	0	0	0	0	0	0	0	0	0	0	0	0	0	0	0	0	0	0	0	0	0	0	0	0
	lmo0069	lmo0069	lmo0069	+	986411	6	293	0	0	0	0	0	0	0	0	0	0	0	0	0	0	0	0	0	0	0	0	0	0	0	0	0	0	0	0	0	0	0	0	0	0	0	0	0	0	0	0
	lmo0070	lmo0070	lmo0070	+	986434	6	722	0	0	0	0	0	0	0	0	0	0	0	0	0	0	0	0	0	0	0	0	0	0	0	0	0	0	0	0	0	0	0	0	0	0	0	0	0	0	0	0
	lmo0071	lmo0071	lmo0071	+	986441	6	257	0	0	0	0	0	0	0	0	0	0	0	0	0	0	0	0	0	0	0	0	0	0	0	0	0	0	0	0	0	0	0	0	0	0	0	0	0	0	0	0
	lmo0072	hypothetical protein	lmo0072	+	986445	6	203	0.372721	0.420828	2.18737	1.38745	0.2827	0.320412	2.87522	0.516841	0	0	0.341767	1.87319	1.42478	0	0.586127	0.258715	1.44477	0.205075	0.923587	0	0	0	0	0	0	0	0	0	0	0	4.81857	0	0	0	0	0	0	0	0	0
	lmo0073	lmo0073	lmo0073	+	986452	5.1	284	0	0	0	0	0	0	0	0	0	0	0	0	0	0	0	0	0	0	0	0	0	0	0	0	0	0	0	0	0	0	0	0	0	0	0	0	0	0	0	0
	lmo0074	lmo0074	lmo0074	+	986466	5.1	449	0	0	0	0	0	0	0	0	0	0	0	0	0	0	0	0	0	0	0	0	0	0	0	0	0	0	0	0	0	0	0	0	0	0	0	0	0	0	0	0
	lmo0075	carboxyphosphonoenolpyruvate phosphonomutase	lmo0075	+	986472	2.1.1	773	12.3778	9.87152	17.0073	11.7019	27.5687	16.0454	17.9033	15.1887	24.2451	13.0997	13.3315	16.5392	20.4661	18.1635	26.1077	18.7518	21.9907	19.9988	29.0489	17.0798	18.7249	4.83413	19.2604	10.2555	7.76314	33.4117	28.1141	12.5902	22.1145	11.4053	27.9402	15.0322	14.5752	24.683	42.2801	15.9434	31.3945	22.9497	35.0735	17.826
	lmo0076	O6-methylguanine-DNA methyltransferase	lmo0076	+	986519	3.5.2	1052	22.8177	22.8278	44.3541	32.2552	53.5632	29.6714	49.3662	28.6368	49.5547	27.2993	26.4845	36.4106	52.307	45.8096	60.296	46.663	55.4198	43.6232	59.285	42.5086	20.6454	26.0575	42.4716	26.9223	41.574	30.4532	27.1229	37.0174	27.0919	25.8487	27.0719	25.7817	34.8185	19.655	42.8657	15.6255	29.4864	24.8074	32.7214	19.6543
	lmo0077	hypothetical protein	lmo0077	-	986552	5.2	638	74.0122	104.927	83.3325	99.1082	63.3566	81.5261	84.1037	84.8929	74.3461	77.4182	87.1778	80.5323	46.0546	58.4333	56.1361	67.397	49.2374	64.0951	53.9583	51.9018	18.1447	15.6145	46.6589	28.3936	17.4632	51.8022	27.6686	11.9823	41.0728	13.8148	10.7683	27.9189	28.6885	12.4574	31.7871	11.8016	40.1398	19.6223	37.5814	16.194
	lmo0078	phosphoglycerate dehydrogenase	lmo0078	+	986565	2.1.1	956	58.7941	51.4017	46.3943	60.9999	49.7765	64.3395	59.2981	79.3246	50.152	63.6849	56.3883	52.1086	37.1292	37.9384	30.361	35.6816	35.4172	36.0212	33.6004	38.7148	10.601	6.51622	9.34641	4.73968	3.5878	10.809	15.6324	2.18201	8.34668	3.84347	5.13578	4.86308	11.7881	4.15896	14.1497	5.0146	11.285	4.91326	8.7282	4.32518
	lmo0079	lmo0079	lmo0079	+	986575	5.2	1478	20.5639	14.2791	17.2979	10.7647	16.689	10.43	15.8137	8.16252	16.5087	9.30379	0	0	0	0	0	0	0	0	0	0	7.83938	7.58948	16.1271	6.1337	3.48228	13.2888	3.67821	3.2944	4.62925	2.48695	0	0	0	0	0	0	0	0	0	0
	lmo0080	lmo0080	lmo0080	+	986576	6	398	33.5393	35.2863	36.1602	25.8921	24.5715	16.382	28.482	16.7798	29.7227	14.8001	0	0	0	0	0	0	0	0	0	0	3.63235	9.37748	14.9449	0	0	0	3.40857	0	0	0	0	0	0	0	0	0	0	0	0	0
	lmo0081	lmo0081	lmo0081	+	986577	6	602	12.9877	13.6675	20.9669	10.3265	6.59915	7.80466	9.48395	8.39288	7.63552	4.34222	0	0	0	0	0	0	0	0	0	0	16.8244	8.27333	4.94445	3.76109	2.84704	1.71547	0	2.30866	0	2.43993	0	0	0	0	0	0	0	0	0	0
	lmo0082	lmo0082	lmo0082	+	986579	6	326	86.4986	113.153	98.0238	61.2387	68.6053	38.3789	63.677	31.1148	63.1475	36.288	92.5341	135.557	65.1087	74.7437	70.7547	67.3038	70.5285	72.2843	69.5261	79.0815	13.2964	22.8845	63.8243	20.8067	10.5001	25.3071	24.9545	14.9004	13.9585	40.4939	6.01216	11.8603	38.8114	17.0403	20.7053	12.5792	41.2833	7.98843	51.088	10.5484
	lmo0083	MerR family transcriptional regulator	lmo0083	-	986580	3.5.2	368	29.6722	35.1306	29.6274	27.4219	26.7255	32.7706	40.1363	32.7165	33.6516	25.9677	20.217	18.2953	25.2059	15.2046	21.3865	15.1611	22.1648	17.7999	23.3175	18.3843	19.6383	6.75992	4.03998	3.07308	2.32624	2.80332	14.7427	0	15.4622	0	0	6.30619	11.4646	0	15.2905	3.71581	25.6091	5.66334	2.82957	3.73911
	lmo0084	oxidoreductase	lmo0084	-	986581	2.1.1	983	20.2451	19.3684	21.3891	25.3844	24.2639	23.7808	24.6629	24.1087	22.0484	22.7595	17.9261	15.6632	21.3413	17.4984	20.7789	17.1635	20.5923	16.7511	19.1475	14.7899	27.9846	7.60491	13.6349	5.76203	5.23403	14.7174	11.0571	3.53689	17.395	5.98081	12.9866	7.09446	20.0631	6.47175	28.6697	9.05729	24.6945	11.6806	32.8937	9.81517
	lmo0085	lmo0085	lmo0085	+	986582	5.1	689	0.550979	0.622094	1.83232	0.922956	1.33729	0.378922	1.16884	0.611221	1.31434	0.484432	1.41462	0.738415	2.84337	0.467309	2.68599	0.688406	1.70859	0.727571	1.72938	0.672246	0	3.61509	15.1236	0	0	0	3.94208	0	0	0	2.84924	2.24829	10.2185	1.15366	1.63542	0	7.82588	0	3.02641	0
	lmo0086	lmo0086	lmo0086	+	986583	5.1	5879	2.56036	1.88342	2.95965	1.33577	2.10871	1.04494	2.24444	0.771042	2.56265	0.833751	2.00387	1.70052	3.96686	1.39287	3.39595	1.06812	2.84457	1.2949	3.38586	1.16357	7.14794	8.27227	16.4794	4.43559	4.08753	10.2035	9.02053	3.43295	10.6736	3.75327	10.8664	8.04682	15.8282	3.38446	18.0397	4.08076	9.87219	4.7091	14.3832	5.86621
	lmo0087	lmo0087	lmo0087	+	986585	5.1	2306	3.26288	2.4188	3.25594	1.77897	2.42482	1.01999	2.95561	1.05116	2.87269	1.03837	2.62925	2.23613	4.09463	1.6213	3.3689	1.57853	3.09808	1.68647	2.55898	0.980177	8.79509	2.70309	17.447	3.44073	2.97661	12.5548	10.0218	2.41373	10.8818	1.91324	6.81743	4.70709	28.7287	6.90096	32.7722	8.61788	22.2361	7.02026	21.724	5.98064
	lmo0088	ATP synthase subunit C	lmo0088	+	986586	1.4	242	5.00642	2.8263	3.36658	1.74716	1.6613	0.806964	3.31893	1.51862	2.58374	1.60481	2.86915	2.62092	3.28931	1.8577	3.19837	2.17193	1.51611	2.58243	3.35988	1.43164	0	0	6.13479	13.9996	10.5973	12.7707	16.7903	2.86444	4.69593	0	8.09044	0	17.4093	3.27583	13.9314	5.64253	5.55541	4.29994	8.5935	5.67791
	lmo0089	ATP synthase subunit delta	lmo0089	+	986587	1.4	1031	2.21032	1.58055	2.95465	0.82279	2.51471	1.26675	2.62866	0.919496	2.9743	0.809734	1.6214	2.65368	4.85834	1.74969	4.86622	1.63652	3.14153	1.29722	4.13824	1.46077	2.80873	6.04266	26.0015	2.19761	1.66353	9.02115	14.4963	2.02343	11.0573	2.13849	5.71505	4.50966	34.1606	3.85671	24.0559	7.97171	9.15674	3.5437	20.2347	5.3478
	lmo0090	ATP synthase F0F1 subunit alpha	lmo0090	+	986589	1.4	1496	2.53958	2.23655	3.12983	1.51257	2.46555	1.39723	2.35089	1.44384	2.88923	1.19086	2.74783	1.40395	3.59194	2.49856	4.67257	2.1506	3.78998	2.34747	4.23727	2.28517	9.6814	7.49822	3.98331	6.81744	4.58721	13.82	8.17646	4.18473	13.7208	3.93128	13.7894	9.84473	23.5496	7.44446	27.1369	10.9911	10.8214	6.63088	11.1595	8.29499
	lmo0091	ATP synthase subunit gamma	lmo0091	+	986593	1.4	869	2.6219	1.57883	2.64999	1.62666	2.91668	0.976704	2.61249	0.787737	2.88666	0.896478	3.52609	1.4641	4.76074	2.74262	5.08516	3.39719	4.9969	2.40433	5.84726	2.59916	6.66347	4.3007	10.2811	3.91023	0	5.94498	7.81619	1.60014	3.93486	1.69113	3.38962	5.34939	4.86258	0.914972	10.3765	1.57602	7.75842	5.40459	13.2014	1.5859
	lmo0092	ATP synthase F0F1 subunit beta	lmo0092	+	986598	1.4	1370	3.10574	1.44021	4.66512	1.54836	4.71125	1.8117	3.85041	1.11511	3.46006	1.34093	3.00037	1.99752	8.42711	2.58707	6.54103	3.19516	7.04047	2.92939	6.87133	2.15685	13.7425	5.45823	19.5723	6.61688	5.63489	11.3176	12.8959	5.07702	13.3171	5.36572	8.60384	7.92068	21.5997	11.0317	21.4	8.00078	19.6931	8.00241	21.3239	12.0764
	lmo0093	ATP synthase subunit epsilon	lmo0093	+	986604	1.4	323	7.27496	3.70952	3.90217	3.49432	5.16189	2.01741	7.92018	2.27793	4.30623	1.89138	5.16447	3.1451	7.62523	2.98558	7.01182	1.62895	6.36768	3.87364	5.4275	1.78955	8.94633	11.5482	18.4044	6.9998	2.64932	9.57802	4.19759	0	3.52194	4.54099	18.2035	7.18205	8.70463	4.91374	0	2.11595	0	3.22496	16.1128	4.25843
	lmo0094	lmo0094	lmo0094	+	986607	6	560	2.43963	4.2848	7.55639	2.3965	6.8876	3.61192	6.66529	1.87942	5.47144	2.08539	6.21394	4.88164	9.97348	2.52896	8.20578	3.8572	9.85068	3.95236	10.6352	2.58384	20.6675	15.5623	15.9439	6.064	4.59027	20.2829	4.84855	0	4.06813	3.9339	8.76104	4.14792	27.65	7.0947	12.0689	3.66613	2.40635	1.86254	22.3339	3.68912
	lmo0095	lmo0095	lmo0095	+	986608	5.1	632	31.2308	52.079	38.419	58.1282	56.5775	48.9456	36.9487	54.7166	36.4784	46.2047	39.9818	51.7153	40.7515	37.8985	37.401	37.8533	46.6776	43.818	39.5873	48.0887	9.15833	0	7.06518	0	2.7121	8.17082	2.14853	0	0	0	3.10581	3.67612	4.45545	6.28772	7.13075	0	8.53059	4.12672	4.94839	3.26951
	lmo0096	PTS mannose transporter subunit IIAB	lmo0096	+	986611	1.2	965	199.061	389.431	102.625	104.382	125.073	93.1066	114.455	109.419	73.5161	97.8669	86.6813	108.257	69.6551	58.4804	77.7329	56.3291	70.4795	73.2768	66.3147	50.7186	18.0038	10.3288	35.4941	9.39104	14.2175	26.7709	21.1183	9.36727	15.3566	9.13839	11.1934	8.02962	39.4141	14.0087	45.5582	12.0648	39.1294	15.6841	33.5066	22.8527
	lmo0097	PTS mannose transporter subunit IIC	lmo0097	+	986614	1.2	806	129.74	246.802	62.4825	60.238	74.679	64.7971	63.5061	74.3406	51.9533	66.0647	55.2061	70.1598	47.8123	42.1134	52.673	40.548	51.496	51.6332	50.6634	36.0676	10.7755	3.09097	18.4728	4.21549	7.44569	12.8182	10.1117	6.90022	8.48409	14.5852	4.87231	5.767	24.4636	11.8368	29.3646	9.34478	13.3826	8.41606	32.3454	11.9679
	lmo0098	PTS mannose transporter subunit IID	lmo0098	+	986620	1.2	911	412.524	712.302	199.464	217.633	244.342	238.235	215.131	230.12	186.641	223.511	189.667	223.188	171.222	144.251	189.712	143.345	182.43	171.149	182.49	143.745	9.53491	2.7351	4.90379	6.21693	1.88241	11.3424	10.4387	3.05289	10.0097	0.806623	8.62271	6.80404	24.7395	16.5839	22.2719	8.2689	31.0847	9.16567	21.7523	9.07719
	lmo0099	lmo0099	lmo0099	+	986621	5.2	389	556.226	805.66	334.859	451.775	440.812	407.771	357.755	437.017	414.094	478.675	535.596	583.156	300.344	289.372	323.146	310.983	287.742	327.281	311.926	309.531	59.4587	6.39592	22.9347	2.90761	8.80391	23.8714	27.8978	23.202	23.4074	15.0901	32.7663	17.8999	72.3153	46.9451	60.7622	40.4309	44.9988	30.8108	99.0566	26.5333
	lmo0100	lmo0100	lmo0100	+	986623	6	350	298.075	585.534	167.175	276.185	199.137	153.261	207.422	160.106	236.313	161.891	552.4	901.616	715.253	630.555	808.205	790.464	805.476	726.576	825.756	652	28.9035	3.55329	21.2358	16.1534	12.2277	17.6825	23.2482	3.96615	13.0041	4.19168	8.40161	4.41972	12.0526	20.4109	12.8597	17.5786	15.3842	13.396	20.8227	7.86172
	lmo0101	transcriptional regulator	lmo0101	-	986628	3.5.2	293	92.0697	196.226	77.1533	93.3838	110.438	85.3735	80.0515	74.2352	91.1163	82.4276	182.127	392.745	152.248	77.2108	150.073	106.633	112.53	137.317	129.453	108.666	19.7184	12.7266	25.3529	7.71407	17.518	21.1107	13.8777	7.10265	23.288	5.00435	6.687	7.91491	38.3714	10.8303	61.4117	2.33186	27.5503	14.2161	46.1681	11.7324
	lmo0102	lmo0102	lmo0102	+	986630	5.2	290	79.4318	79.9487	57.7587	62.0061	81.2544	51.4377	75.8378	43.2974	81.2679	51.1151	83.3769	84.9178	53.9361	44.9869	54.0325	42.8026	48.1093	42.1229	47.049	51.6053	9.96086	4.28593	15.3686	3.8968	0	3.55473	9.3472	0	3.92134	0	3.37797	2.6655	4.84587	0	7.75561	2.3559	18.5562	0	7.17602	7.11202
	lmo0103	NADH oxidase	lmo0103	+	986631	1.4	632	66.9061	46.6541	52.9877	45.7201	60.0396	37.1739	54.9018	40.392	59.6219	38.636	59.8075	46.1816	39.374	30.6652	38.6289	33.5177	33.5241	30.2034	36.0155	35.7231	20.6062	29.5546	2.35506	0	8.13631	16.3416	12.8912	4.39848	12.6189	8.13504	21.7407	12.2537	20.0495	6.28772	14.2615	11.9135	19.1938	8.25345	18.1441	7.62885
	lmo0104	lmo0104	lmo0104	+	986632	6	371	126.112	175.852	62.9752	110.134	97.0482	85.0436	89.874	105.719	97.8903	114.864	166.054	151.174	65.6319	53.9139	75.0527	73.0661	62.393	60.3913	76.1413	68.7358	0	0	8.0148	0	0	11.1229	7.31192	1.87113	9.2025	0	2.64244	0	0	8.55942	9.10033	1.84292	7.25788	4.21325	16.8405	1.85448
	lmo0105	chitinase B	lmo0105	+	986634	2.1.1	2270	0.301328	0.151209	0.720456	0.15579	0.964989	0.259039	1.03311	0.394629	0.583645	0.343433	0.644706	0.560884	1.63182	0.511138	1.4479	0.511278	1.07069	0.386852	1.41039	0.382967	4.46726	0.549187	4.59501	2.49663	0.75595	7.74339	4.7909	1.5325	2.51235	1.29571	3.46275	2.0493	12.4188	4.20621	10.9316	3.01879	6.5388	4.83105	5.05734	3.94904
	lmo0106	transcriptional regulator	lmo0106	+	986639	3.5.2	902	12.2094	8.74652	6.50641	9.16823	7.72776	5.35652	9.82448	7.82301	9.03879	7.46498	13.8977	10.8616	9.25399	6.64168	10.4607	7.24745	9.13899	8.52458	10.6412	7.19147	1.60499	2.76236	4.95267	3.76733	0.950588	3.43663	6.02444	5.39581	11.3732	0.814662	2.17716	4.29491	12.493	4.40767	6.24829	4.55526	20.9297	2.89282	13.8752	4.58383
	lmo0107	ABC transporter ATP-binding protein	lmo0107	-	986644	1.2	1781	6.10158	4.62486	5.71762	4.20906	5.37225	4.47498	5.22526	4.76294	4.81515	4.0016	6.76859	5.89707	4.60776	4.84931	6.03889	3.19866	5.54071	4.06145	5.77994	3.87192	69.944	46.1928	71.9443	50.9076	45.2794	63.8534	73.2669	49.9976	67.2371	49.9509	58.4718	51.3625	87.8376	39.3099	71.5566	39.6259	70.4527	44.5631	70.8964	36.0031
	lmo0108	ABC transporter ATP-binding protein	lmo0108	-	986645	1.2	1742	4.36231	4.48207	3.15745	2.55759	3.37488	1.98755	2.77625	2.29865	3.76221	2.84462	4.84003	4.93283	2.58472	2.18292	3.70441	2.30127	3.25508	2.37619	3.09876	2.42836	46.564	32.1998	52.1721	30.5774	22.6538	45.6975	52.2784	31.149	43.209	27.4335	30.454	31.5961	59.0596	31.0555	66.0361	25.1729	57.3135	27.5759	58.705	15.8317
	lmo0109	AraC family transcriptional regulator	lmo0109	+	986650	3.5.2	833	9.57276	9.98483	4.01281	2.03626	3.38833	2.66472	3.42855	2.3388	3.01126	3.00592	8.77775	6.94921	2.96232	2.01044	3.65592	2.27818	5.65434	2.95957	3.76522	2.43327	12.1644	2.9909	19.6622	6.79837	3.0877	13.6435	6.52287	5.00763	9.57766	4.41031	7.07186	10.2305	18.5991	1.90893	25.7079	5.75416	14.568	6.26431	16.2751	4.96307
	lmo0110	lipase	lmo0110	+	986652	2.4	1115	15.4659	13.9235	4.59819	3.36046	8.16486	5.68128	5.64997	6.23544	6.81356	6.23989	14.1815	9.35922	7.09711	4.10277	6.48206	4.44544	6.47038	5.54805	7.54098	6.80604	7.79197	5.58783	20.037	11.1771	9.99906	19.465	15.8425	8.73193	9.2025	15.8202	12.3314	6.25533	20.2172	9.98599	19.2118	11.6718	20.564	8.89464	17.7761	13.5995
	lmo0111	lmo0111	lmo0111	+	986654	5.2	707	85.0562	112.889	33.824	48.6724	34.6188	50.6848	39.5587	53.239	32.3186	44.851	86.5596	106.957	33.5609	33.0641	34.8746	41.8943	31.0135	37.9354	35.2163	37.0163	20.4704	14.0927	31.5838	22.4231	29.0977	29.2211	32.6558	17.6964	30.623	29.0931	16.6608	10.9557	47.8017	13.492	36.6584	5.80989	20.974	18.4479	28.0199	15.5902
	lmo0112	Fnr/Crp family transcriptional regulator	lmo0112	-	986655	3.5.2	695	14.202	14.5549	17.5241	25.8233	18.8093	23.0089	23.07	25.3742	22.8527	23.0523	18.1313	21.9615	13.4679	14.825	17.2655	11.9812	15.1389	14.2456	12.9037	14.2454	1236.91	1014.25	471.215	549.062	425.491	420.607	463.109	512.044	359.056	439.693	1029.6	1006.35	498.415	354.552	513.959	365.439	434.472	378.321	418.544	289.427
	lmo0113	hypothetical protein	lmo0113	-	986656	4.3	452	58.9146	91.7238	384.659	312.093	284.407	246.45	400.903	256.141	288.129	220.133	80.34	119.082	206.122	56.6589	213.933	94.604	185.59	116.733	191.185	75.1324	268.745	286.334	187.578	102.633	73.9004	155.278	102.076	55.316	123.431	50.3418	225.675	380.125	133.855	54.4742	134.516	42.375	95.3618	57.6648	112.939	60.9153
	lmo0114	repressor C1	lmo0114	-	986659	3.5.2	335	96.1753	107.822	421.877	566.29	392.367	478.753	593.965	504.114	427.078	431.419	94.828	88.7087	206.097	118.421	204.265	144.197	213.813	167.839	205.234	124.246	69.0146	66.8145	79.8618	20.2494	20.4376	46.1797	36.429	12.4296	33.9616	6.56821	38.0323	64.6384	50.3625	7.10737	47.0184	26.5249	24.1065	15.5489	18.6448	24.6381
	lmo0115	hypothetical protein	lmaD	+	986665	4.5	428	16.8376	12.8073	114.763	35.1325	82.6749	35.6531	146.295	36.6198	81.7942	31.1663	16.2518	16.0334	165.484	23.751	145.073	44.043	130.362	31.4009	119.166	22.0302	0	0	10.4248	7.92984	0	12.0562	3.1702	0	15.9596	1.71478	4.5827	0	13.1482	0	10.5216	3.19612	3.14677	1.21782	9.7353	1.60808
	lmo0116	hypothetical protein	lmaC	+	986666	4.5	416	22.2453	23.4695	131.442	59.8999	96.3946	42.7923	169.845	42.9833	99.0371	37.1398	28.7576	16.4948	185.581	36.3425	166.452	57.967	160.442	40.6314	138.56	31.0068	10.4267	0	25.0246	13.5967	8.23387	7.44191	9.7843	5.00763	16.4188	1.76412	21.2156	7.44039	10.145	1.90893	24.3548	4.93214	16.1866	5.01145	15.0232	0
	lmo0117	antigen B	lmaB	+	986670	4.5	389	98.0658	115.566	315.218	137.165	229.352	120.169	479.2	111.383	258.115	95.8493	72.4019	71.8535	467.844	92.103	443.329	125.719	420.183	98.5812	371.348	73.2943	22.297	12.7918	19.1122	8.72283	13.2059	18.5666	38.3595	10.7086	17.5555	5.65877	15.1229	31.822	36.1577	0	37.6147	5.27359	17.3072	4.01879	13.386	10.6133
	lmo0118	antigen A	lmaA	+	986672	4.5	512	51.8758	41.502	149.321	41.518	142.547	49.9468	222.241	54.0537	119.26	42.461	39.6849	43.9487	241.647	51.792	232.963	74.2799	205.106	55.9435	212.53	47.8091	0	0	5.8119	0	1.67326	2.01642	2.65111	0	4.44877	0	1.91616	0	5.49766	1.55171	13.1981	9.35472	13.1576	8.14726	6.10591	5.37907
	lmo0119	lmo0119	lmo0119	+	986674	5.2	302	27.3526	41.3662	223.849	51.3768	119.91	29.554	257.461	29.7516	104.987	29.6015	25.5411	29.2168	262.358	24.6887	207.373	36.5787	188.22	29.2709	153.383	20.0925	4.78319	16.4647	19.6799	11.2274	0	23.8976	22.4425	0	18.8302	4.85571	6.48837	2.55994	9.30792	5.2543	26.0696	6.78779	8.91066	3.44847	0	11.3839
	lmo0120	lmo0120	lmo0120	+	986675	5.2	404	37.7359	44.0903	205.851	58.5298	130.293	35.6678	262.135	25.5128	126.086	26.9608	26.3388	32.8663	275.944	24.3624	215.964	39.4856	195.943	30.5759	161.274	21.904	0	6.15903	22.0852	2.79992	0	0	3.35807	1.71867	11.2702	0	7.2814	9.57606	3.48185	0	11.1451	0	19.9995	3.86995	12.8903	0
	lmo0121	phage tail protein	lmo0121	+	986683	4.3	1868	27.7453	21.267	127.015	25.8582	85.0714	22.5224	161.739	18.7573	71.7391	15.8873	21.7107	19.9345	190.116	17.4592	146.76	24.7087	135.105	19.0262	123.256	16.2248	13.1826	2.00193	4.78572	3.03362	2.75564	11.6228	6.54904	4.84151	12.8215	2.75521	3.15566	2.49008	14.3354	4.68501	7.84897	2.20086	10.8344	2.51578	11.7316	2.58377
	lmo0122	hypothetical protein	lmo0122	+	986687	4.3	818	43.2629	34.3815	161.182	45.9637	104.498	38.7875	228.728	35.5314	110.135	31.29	27.0709	26.9062	273.71	30.7876	215.416	40.1472	192.89	29.014	170.161	25.4863	23.0049	7.61419	29.1234	4.15373	5.24042	20.2086	21.5876	4.24945	18.1129	2.69465	13.2025	11.365	20.6615	3.88779	16.5339	5.85955	16.4831	6.37904	11.4737	6.73862
	lmo0123	hypothetical protein	lmo0123	+	986689	4.3	1136	45.2733	43.7928	210.423	65.2833	132.739	49.6123	276.83	37.788	135.166	33.514	28.0231	34.8969	345.617	32.0458	255.966	46.7898	224.678	38.5606	195.316	24.6306	3.82403	1.09693	9.1779	0.997333	0.754953	9.09785	3.58844	1.22438	3.01084	0.647001	0.864546	4.0932	9.92189	2.80044	5.95483	3.61777	5.93652	4.13543	4.59151	1.21349
	lmo0124	lmo0124	lmo0124	+	986692	6	299	33.7089	35.1981	131.636	52.1265	102.077	36.386	190.383	31.4549	99.9906	26.7407	20.2189	24.4139	204.912	29.2348	165.405	42.75	160.875	34.7233	132.935	24.5454	0	0	0	0	0	0	4.53339	0	0	0	0	0	9.401	0	15.0459	0	4.49988	1.74148	6.96074	2.29955
	lmo0125	lmo0125	lmo0125	+	986693	6	575	37.7535	35.0252	149.904	40.5395	104.028	35.4055	194.624	31.4842	94.1045	29.2089	25.9031	27.3108	238.933	27.3181	179.355	44.9894	167.322	33.1923	141.963	23.0516	2.51616	2.16529	0	0	0	5.38763	2.36114	0	5.94328	0	1.70658	2.69327	4.89635	1.38199	0	0	4.68738	1.81404	1.81269	4.79074
	lmo0126	lmo0126	lmo0126	+	986697	6	479	31.0477	34.3396	100.091	40.9818	68.0035	26.6903	144.956	24.4918	71.5049	21.7036	17.5753	15.7894	139.727	20.287	120.442	26.7188	109.757	19.7846	90.2807	20.6558	3.01939	0	0	4.72487	0	6.46516	8.50011	0	4.75462	1.53258	6.14368	3.23192	11.7512	6.63355	21.1583	7.14132	14.0621	5.44212	13.0514	2.87444
	lmo0127	hypothetical protein	lmo0127	+	986705	4.3	536	18.6902	18.8644	69.2465	14.6264	44.6761	13.511	90.1118	10.0134	40.6614	7.98817	10.906	11.3856	105.545	8.16616	72.8108	12.2853	67.0969	7.47894	60.4649	7.98997	2.69889	4.64508	2.77608	2.11167	1.59848	1.9263	2.53262	0	6.37492	0	9.15259	4.3333	21.0078	0	4.20276	6.38331	5.0278	1.94578	1.94434	3.854
	lmo0128	hypothetical protein	lmo0128	+	986706	4.3	422	9.88636	11.3653	40.7896	9.36774	33.6754	9.42602	60.4919	7.85158	30.3452	7.90209	6.92259	9.0338	66.1362	6.09821	53.2836	10.855	50.1672	7.91212	42.0178	6.30529	3.42625	0	7.04848	0	0	0	6.43034	0	2.69766	0	2.32385	1.83371	0	1.88186	5.33542	3.24145	0	3.70527	4.93669	1.63089
	lmo0129	N-acetylmuramoyl-L-alanine amidase	lmo0129	+	986713	1.1	728	19.087	34.5045	87.429	23.4896	58.3828	21.1604	98.6628	16.8494	54.8326	15.2075	15.4934	18.958	123.1	14.2423	104.152	24.036	96.1216	19.11	84.8586	15.5094	3.97615	0	2.04493	1.55551	1.17748	2.83793	0	0.954815	1.56531	0	2.69681	1.06401	9.67181	2.18388	9.28758	0.940421	3.70361	2.14997	5.729	0
	lmo0130	5'-nucleotidase	lmo0130	-	986721	1.8	2354	20.6312	17.0604	16.6426	13.2506	18.2441	12.4067	16.0335	14.7744	17.0329	15.5183	11.9309	8.35656	8.45432	11.4464	10.1546	10.1746	7.94714	8.47365	8.96056	8.98648	29.54	18.5359	56.3384	22.6312	19.3181	43.9247	65.8352	13.5961	38.7638	16.8682	16.2788	9.2223	47.3044	12.8446	48.396	15.1378	40.6996	14.198	41.6757	9.95985
	lmo0131	hypothetical protein	lmo0131	+	986722	5.2	749	82.7262	101.531	68.4211	102.932	79.8164	107.981	83.3873	108.528	76.923	86.0158	43.9703	52.8188	61.4252	26.9132	59.3067	42.0111	58.9465	42.8952	50.9968	29.0679	21.2565	19.9553	59.6301	46.8707	40.0578	63.4448	54.4007	29.6986	51.7303	33.349	13.1065	14.479	28.203	6.36821	19.5596	5.48454	12.5997	10.4489	22.2744	9.19822
	lmo0132	inosine 5-monophosphate dehydrogenase	lmo0132	-	986732	2.3	1508	265.694	248.217	273.58	320.881	256.748	364.635	281.029	398.72	285.978	409.793	246.586	276.109	221.363	277.57	227.215	257.524	215.776	270.613	246.721	261.242	20.1693	9.09162	32.601	14.2779	14.221	26.0492	32.4457	17.9896	32.5167	13.1625	14.3312	14.3926	27.1003	14.243	26.1732	9.5407	29.5221	13.8487	22.8334	19.6582
	lmo0133	hypothetical protein	lmo0133	+	986735	5.2	233	8.44834	2.20126	2.22477	1.20957	1.47874	1.676	2.50661	0.901159	2.68311	0.952303	3.27745	4.62693	97.1958	41.0633	75.6255	36.5385	129.733	42.5505	88.3013	25.2739	0	0	0	0	3.6683	8.84125	5.81204	0	4.87654	0	8.40161	3.31479	12.0526	3.40182	19.2896	2.92977	23.0763	15.6286	17.848	0
	lmo0134	hypothetical protein	lmo0134	+	986737	5.2	278	23.4373	20.3084	6.93061	4.81878	6.82128	5.38843	6.83252	5.85753	7.25113	4.59256	12.7446	15.9791	205.49	110.024	155.141	138.66	232.67	120.108	196.29	77.9318	0	4.47027	5.3432	0	0	18.5381	29.2477	4.98968	12.27	2.6367	7.04651	0	40.4344	0	36.4013	4.91446	14.5158	13.1079	22.454	9.89056
	lmo0135	peptide ABC transporter substrate-binding protein	lmo0135	+	986748	1.2	1574	304.237	338.272	454.441	330.303	510.579	345.122	358.212	287.956	520.926	319.226	364.804	417.229	235.893	283.381	296.647	199.919	209.307	197.144	230.162	307.798	8.28175	5.54313	21.7697	7.91977	2.18002	13.1356	8.63503	4.41943	10.8677	9.34146	11.2342	4.92483	20.5927	10.6137	22.2106	7.39977	14.5711	9.9513	15.9103	7.88419
	lmo0136	peptide ABC transporter permease	lmo0136	+	986752	1.2	950	139.917	151.657	403.448	223.069	439.535	263.656	342.229	224.951	405.728	242.99	195.892	259.977	263.149	298.37	304.017	203.619	233.446	222.462	263.037	393.675	21.3357	18.3605	17.2432	13.1163	7.22087	17.4036	10.0106	5.85539	23.9981	11.6032	12.4036	5.70939	14.8281	10.0445	17.7988	5.04624	7.09761	7.69107	21.9582	8.70494
	lmo0137	peptide ABC transporter permease	lmo0137	+	986757	1.2	893	97.9781	109.952	316.616	213.625	427.112	255.753	316.154	266.301	379.471	285.341	182.49	204.957	236.767	387.076	290.231	271.564	236.379	266.033	265.968	496.732	19.4538	9.76558	20.0101	16.4895	8.64142	11.5708	4.56382	14.0146	16.5933	13.9887	8.79632	6.94104	14.1961	7.12327	21.458	5.36797	10.5702	9.9346	24.5261	9.25995
	lmo0138	lmo0138	lmo0138	+	986772	5.1	284	2.6679	0.903673	2.0876	1.48968	2.83295	0.91739	2.05806	2.40467	1.9582	2.73662	2.69096	2.68161	3.05953	1.35765	2.30749	4.81482	1.80976	1.90828	2.64438	2.44132	50.8528	17.5046	47.0764	23.873	39.1542	68.9617	28.632	26.8655	44.0428	54.2051	31.0417	2.72162	29.6874	11.1723	39.5944	9.62199	23.6836	10.9988	21.9813	14.5235
	lmo0139	lmo0139	lmo0139	+	986775	5.1	368	0	0.697959	1.20928	1.34233	1.56289	1.23997	1.98694	1.00007	1.32338	1.50975	1.7005	0.690388	2.36305	1.39813	1.78221	1.85938	0.998416	1.02037	0.851002	1.41418	23.5659	13.5198	32.3199	12.2923	18.6099	36.4432	22.1141	18.8634	27.8319	13.9552	7.99178	2.10206	19.1077	19.4153	21.4067	3.71581	18.2922	14.1584	16.9774	5.60867
	lmo0140	lmo0140	lmo0140	+	986783	5.1	1388	8.10165	9.27095	6.58575	8.25278	7.97177	6.72934	8.3928	6.79372	6.42865	5.45466	7.17784	8.80357	6.90543	5.43209	6.71451	6.49749	5.4639	5.57202	5.74233	4.88395	10.4342	10.775	21.4651	8.98031	5.56187	11.9156	15.6661	12.027	17.2522	9.00351	6.36926	8.9349	23.3502	5.15783	12.1862	3.94855	17.4941	4.51355	9.77209	5.4633
	lmo0141	lmo0141	lmo0141	+	986784	6	242	1.56451	0.353288	0.918157	2.62074	0.711985	0.268988	0.905163	0.650837	0.574164	0.917032	0.286915	0.786276	1.19611	0	0.246029	0	0.303223	0.344324	1.29226	0.238606	0	0	0	0	0	0	0	0	0	0	0	0	0	0	0	0	0	0	0	0
	lmo0142	lmo0142	lmo0142	+	986788	5.1	356	4.47265	7.45467	8.95782	9.51394	2.2616	6.59133	7.80418	3.98706	3.51736	3.90124	3.9059	5.53036	4.07081	1.62576	3.68423	2.51323	2.68314	1.40623	2.63882	2.43619	12.179	0	0	0	2.40443	2.89755	0	0	3.19639	2.06062	2.75347	6.51816	3.95	0	6.3218	0	0	1.46343	0	1.9324
	lmo0142a	hypothetical protein	lmo0142a	+	16695797	6	287	1.84807	4.76939	7.74695	1.71986	2.00246	1.81567	4.07324	1.28133	1.69558	0.58031	4.11544	6.85534	2.77536	1.79135	2.28345	0.916282	2.81429	2.03366	3.27104	1.00662	0	0	0	0	0	0	0	0	0	2.55431	0	0	0	0	0	0	0	0	0	0
	lmo0143	lmo0143	lmo0143	+	986794	6	176	0	0	0	0	0	0	0	0	0	0	0	0	0	0	0	0	0	0	0	0	0	0	0	0	0	0	0	0	0	0	0	0	0	0	0	0	0	0	0	0
	lmo0144	lmo0144	lmo0144	+	986795	6	443	7.36376	10.8278	4.18754	4.62171	2.46789	4.56371	4.95393	2.96834	4.55646	3.38775	8.63653	7.45899	2.94584	2.75965	3.23162	2.49625	3.15311	2.92093	1.83885	2.22	0	0	0	0	0	0	0	0	0	0	0	0	0	0	0	1.54407	3.04046	0	0	0
	lmo0146	hypothetical protein	lmo0146	+	986800	6	206	6.97907	12.0272	5.38918	4.44386	4.17904	2.84192	4.25033	4.83883	2.69607	1.07652	6.06264	7.07648	3.51034	0.311539	3.4658	2.03972	2.13574	1.81893	1.2136	2.80103	0	0	0	0	0	0	0	3.36261	5.51261	3.55382	0	0	0	3.84554	10.9028	0	6.52157	0	5.04401	0
	lmo0147	lmo0147	lmo0147	+	986802	6	437	0	0	0	0	0	0	0	0	0	0	5.09373	3.78059	1.82489	2.65022	1.50145	0.963978	1.68226	1.14617	1.43388	1.1914	0	0	0	0	0	0	0	0	0	0	22.4427	7.08366	12.8781	3.63482	0	6.26089	9.24634	2.38559	11.9191	6.30015
	lmo0148	lmo0148	lmo0148	+	986805	5.1	350	0	0	0	0	0	0	0	0	0	0	4.1713	4.53621	3.51934	0.918641	2.21426	0.902185	1.67939	1.0727	2.14714	1.81708	0	0	0	0	0	0	0	0	0	0	2.80054	0	0	0	3.21493	0	0	0	0	0
	lmo0149	lmo0149	lmo0149	+	986806		617	2.46068	1.38914	0.722046	1.71747	1.30646	1.90381	2.72867	2.38851	2.25763	2.07334	10.9432	5.77111	6.11412	2.29571	6.67502	3.67224	5.84219	4.12938	5.69097	2.43934	0	0	0	0	0	0	0	0	0	0	82.711	64.0109	150.598	55.3869	147.902	57.6853	93.9296	51.568	82.7855	61.3959
	lmo0150	lmo0150	lmo0150	+	986809	6	365	0	0	0	0	0	0	0	0	0	0	15.6204	13.2249	12.1107	4.58116	9.14743	6.34487	10.8713	5.02938	7.5502	5.70307	0	0	0	0	0	0	0	0	0	0	26.8576	23.3122	57.793	17.3995	58.5803	20.6045	29.5074	22.839	31.3804	18.8488
	lmo0151	lmo0151	lmo0151	+	986811	6	407	0	0	0	0	0	0	0	0	0	0	41.8664	46.2053	38.1129	21.9704	33.1162	20.4385	33.2296	23.9938	26.938	20.3219	0	0	0	0	0	0	0	0	0	0	45.7764	106.463	155.531	42.923	138.289	21.844	69.4835	34.5735	61.4183	49.0346
	lmo0152	peptide ABC transporter substrate-binding protein	lmo0152	-	986821	1.2	1655	391.195	590.575	760.953	671.707	920.573	918.807	617.405	664.48	930.187	778.826	543.364	862.984	503.426	689.397	591.929	438.891	468.529	513.847	541.76	877.842	78.7666	40.6697	53.1126	26.021	26.954	38.1038	50.0973	23.1179	44.1009	24.4325	38.5835	19.2042	32.3585	13.9401	32.027	16.5596	22.0103	18.9291	29.0031	15.8303
	lmo0153	zinc ABC transporter substrate-binding protein	lmo0153	+	986823	1.2	941	1.13003	1.45816	3.71064	3.00467	3.30597	1.59594	3.42463	2.74222	4.29526	3.37097	1.03618	1.01415	0.771379	1.30073	1.84051	1.34466	1.40796	1.42116	1.00006	1.23102	16.924	7.94398	18.9905	8.42651	4.55616	14.2755	12.9938	8.12809	10.9023	5.46654	12.5221	6.58735	16.4667	5.07023	20.3646	7.27778	22.9293	9.42838	15.5176	6.59108
	lmo0154	zinc ABC transporter ATP-binding protein	lmo0154	+	986826	1.2	704	0.970661	1.82657	2.95373	0.802949	1.79966	0.92715	2.49594	1.19643	2.37484	1.18531	0.593365	0.632366	1.75218	0.27442	0.848014	0.898346	1.25418	0.712091	1.069	0.657943	20.5575	15.9218	40.1763	8.04232	12.1756	29.3454	17.3619	11.8478	22.6603	6.26077	22.309	6.60137	18.0019	7.9038	12.805	3.88974	9.57422	8.1516	11.8481	4.89267
	lmo0155	zinc ABC transporter permease	lmo0155	+	986832	1.2	806	1.97861	2.44675	1.9353	2.80585	2.7156	2.51089	2.45303	2.87433	3.19846	2.07099	2.76462	2.84111	1.53071	2.63708	2.59291	2.3544	2.28262	2.28098	2.80166	2.01174	66.449	23.1822	35.0983	26.6981	19.146	47.4272	30.335	17.2506	36.7644	15.4968	9.74462	21.1457	27.9583	10.8504	13.9832	10.1943	13.3826	5.8265	25.8763	17.0971
	lmo0156	lmo0156	lmo0156	-	986833	5.1	680	0.781565	0.630315	0.982873	0.727341	0.846854	0.575895	0.968963	0.0774123	0.614633	0.409029	0.614276	1.21578	1.28042	0.189394	0.96569	0.0775005	0.216397	0.245729	0.368892	0.255424	23.4102	9.15715	83.1845	14.9864	13.8652	21.2657	19.9709	7.1548	36.864	4.32094	18.7648	21.6411	31.0606	8.18235	33.1407	7.04695	33.6996	9.20605	19.9316	7.09114
	lmo0157	ATP-dependent helicase	lmo0157	+	986835	3.2	2339	92.5093	54.2243	132.819	76.5961	132.47	85.7554	131.064	86.8266	131.532	85.0883	79.7911	43.4659	70.8318	47.1814	71.8442	44.6582	62.1268	43.4086	70.3189	46.3355	5.57425	5.86293	19.7493	7.26902	8.80391	23.8714	14.5301	7.43654	19.0185	5.65877	6.72129	6.2981	12.6552	12.5867	24.112	6.73848	11.5382	9.60045	17.4018	8.25481
	lmo0158	hypothetical protein	lmo0158	+	986836	5.2	812	137.761	118.267	221.191	129.509	222.738	142.788	223.652	146.092	213.745	135.54	132.494	113.981	169.728	109.781	188.032	118.474	155.795	120.206	175.357	104.124	7.13066	7.67038	7.33458	4.18438	6.33492	8.90649	5.01852	4.28081	8.42147	6.33392	4.83635	8.58665	13.876	0	9.71597	3.37302	4.98142	6.42612	10.2741	3.39418
	lmo0159	peptidoglycan binding protein	lmo0159	+	986840	1.8	2381	3.63896	3.82032	6.21317	4.72327	6.53699	4.82959	6.06368	5.59933	6.32593	4.63078	4.27337	3.5828	4.54531	4.38588	4.84404	3.58942	4.48533	3.81119	4.79862	4.06502	10.9519	1.57079	13.1427	5.71268	4.32434	14.3308	13.132	5.84433	15.8088	5.55899	10.3168	12.0485	20.7201	14.0357	27.9505	17.8443	24.3696	13.3791	22.7933	16.2185
	lmo0160	peptidoglycan binding protein	lmo0160	+	986846	1.8	1715	66.9516	112.514	47.8469	71.8733	60.2922	69.3255	52.4251	65.7436	66.9558	70.0917	77.765	163.6	39.5925	60.6178	49.124	52.4087	37.5715	57.9015	43.6626	67.1042	82.7692	56.6911	209.366	181.726	183.081	143.469	213.989	188.212	125.682	127.751	82.4885	76.3908	135.591	76.5409	144.672	73.1112	121.151	87.9872	125.342	73.9717
	lmo0161	lmo0161	lmo0161	-	986851	5.2	830	213.557	243.187	252.198	387.519	258.929	351.991	294.067	375.686	253.188	342.571	401.458	397.688	191.934	212.634	205.255	224.83	189.395	252.271	203.829	242.321	40.1132	33.0186	64.5814	30.0208	30.9885	65.9742	50.7347	41.0432	61.793	37.1804	35.4869	44.8035	57.6956	17.2424	39.38	14.8498	24.3676	26.4051	32.6677	19.0938
	lmo0162	DNA polymerase III subunit delta'	lmo0162	+	986854	3.1	992	737.686	559.704	433.268	427.766	451.203	453.599	491.225	466.178	493.736	441.302	511.915	444.343	253.629	300.232	270.447	284.033	258.151	272.456	267.47	307.365	7.29761	5.02399	24.0202	13.7035	7.77989	32.2933	39.7185	12.6174	22.9831	9.63074	17.8185	5.4679	61.0639	18.4377	42.0466	11.7368	55.7387	19.9928	37.8529	14.5893
	lmo0163	lmo0163	lmo0163	+	986862	5.2	833	870.665	600.222	495.716	456.206	477.271	468.521	537.14	483.12	510.743	446.279	574.817	504.696	309.475	339.454	308.674	291.923	298.443	283.918	320.948	339.823	13.9022	4.48635	37.5369	13.5967	4.11694	31.008	26.0915	5.00763	25.9965	5.29237	24.7515	6.51034	37.1982	22.9072	36.5323	13.1524	38.8479	11.2758	25.0386	19.8523
	lmo0164	DNA replication intiation control protein YabA	lmo0164	+	986868	5.2	389	663.455	451.918	415.904	353.255	394.232	390.006	399.302	389.03	431.802	390.539	464.445	393.724	262.894	283.088	252.017	264.701	262.425	241.465	271.345	292.582	7.43234	6.39592	11.4673	0	8.80391	7.95712	3.48722	1.78477	14.6296	0	15.1229	1.98887	7.23153	6.12328	17.3606	12.3051	10.3843	12.0564	2.67721	7.07555
	lmo0165	hypothetical protein	lmo0165	+	986872	5.2	752	89.3639	62.5911	101.235	62.7724	92.6715	66.3189	101.847	61.9591	103.205	55.9317	80.9238	62.0813	61.7595	48.4735	63.2784	50.7452	54.7975	51.8914	57.2992	54.2852	13.473	4.96894	9.89876	7.52967	4.55979	8.24244	9.03066	1.84876	9.09251	2.93084	7.83258	10.3009	9.36354	6.34284	20.9803	6.37313	8.96391	6.24434	8.3196	4.58079
	lmo0166	GIY-YIG nuclease	lmo0166	+	986878	5.2	272	124.776	108.49	102.975	76.203	132.875	87.1521	107.695	91.3389	116.779	87.3398	116.711	101.248	77.9873	73.465	80.8083	66.1173	66.6657	68.8061	81.208	84.1047	5.30881	9.13703	5.46063	8.30746	3.14425	7.57821	9.9635	2.54967	12.5397	2.69465	10.8021	8.52375	5.16538	0	0	0	4.94493	1.91371	3.82458	0
	lmo0167	hypothetical protein	lmo0167	+	986880	5.2	881	166.036	115.439	134.66	116.81	158.824	122.428	154.783	144.167	167.126	138.137	150.112	120.228	104.218	109.601	114.283	108.009	109.773	102.122	109.159	118.724	47.6529	24.0391	32.1137	23.1422	28.2234	30.4933	30.8394	20.5188	37.5195	21.6855	30.0915	32.5391	28.7786	15.3429	20.4706	17.8776	26.0197	20.7319	24.8598	12.5146
	lmo0168	AbrB family transcriptional regulator	lmo0168	-	986889	3.5.2	284	55.7591	89.7649	34.7063	51.1458	49.9814	36.6956	35.7587	34.5903	40.6327	41.4402	77.5486	82.4596	25.2412	21.0437	29.3681	23.3334	27.1464	26.1287	28.2067	33.5681	30.5117	35.0092	130.768	55.7037	18.0712	76.2208	128.844	12.2116	64.0623	18.0684	24.1436	10.8865	64.3226	11.1723	47.5133	12.0275	47.3672	21.9976	43.9625	9.68233
	lmo0169	glucose transporter	lmo0169	+	986890	1.2	857	12.318	4.9028	10.9216	4.86578	9.14129	7.38964	10.4252	6.02138	9.67546	5.25931	9.83236	4.08258	589.95	254.647	480.161	310.639	515.095	284.071	487.719	178.404	13.5133	14.5362	8.68737	6.6082	8.00355	8.43937	6.34041	6.49007	11.9697	5.14434	13.7481	9.94437	9.86118	8.34992	13.152	4.79418	1.57339	7.3069	9.7353	8.0404
	lmo0170	lmo0170	lmo0170	+	986891	5.2	1265	150.569	195.839	117.019	127.211	144.177	160.312	121.965	153.49	120.346	148.251	156.843	193.932	1107.06	647.841	953.207	816.222	1024.81	792.69	971.179	551.188	20.6062	20.6882	18.8405	11.6442	8.81434	16.3416	6.44558	11.546	11.7176	11.6215	30.2816	24.5075	18.9357	3.77263	15.1528	5.41522	10.6632	7.4281	17.3194	7.08394
	lmo0171	internalin	lmo0171	+	986893	1.8	2498	21.3288	18.7569	14.6718	13.3082	12.7619	12.8688	13.496	12.151	13.0366	10.8343	24.105	23.1154	20.4122	13.3416	19.2345	17.6137	18.4576	16.791	17.3911	14.2459	135.129	94.3264	109.167	73.5105	46.7146	75.7503	77.2799	46.2369	67.5807	48.5717	138.067	107.394	81.8214	33.765	94.827	28.2567	64.2841	38.6763	55.1511	40.0283
	lmo0172	pseudo	lmo0172	-	986894	4.4	386	0	0	0.192172	0	0.44706	0.337799	0.378906	0.272443	0	0	0.360312	0.987416	0.938811	0.166637	0.617933	0	0.571187	0.216203	0	0.149822	14.9799	35.4503	11.5562	11.7206	0	0	24.5998	28.7777	14.743	24.7114	5.08004	0	32.7942	18.5122	23.3269	21.2579	17.4414	9.44988	0	0
	lmo0173	pseudo	lmo0173	-	986908	4.4	521	2.03925	0.822308	2.70698	2.30444	1.87817	2.75481	2.52821	3.02976	1.47006	3.30843	9.48304	8.9066	8.76979	8.77144	9.96417	7.68413	7.9047	7.85414	9.14387	8.66387	33.3174	45.3963	22.8468	15.2065	3.28882	21.7982	23.4486	10.6676	21.8603	11.2742	105.455	93.6142	29.7158	18.2994	58.3676	18.3869	25.8614	28.0238	44.0047	19.8237
	lmo0174	transposase	lmo0174	-	986910	4.4	305	0	0	0	0	0	0	0	0	0	0	0	0	0	0	0	0.172477	0	0	0.205242	0	0	0	0	0	0	0	0	0	0	0	0	0	0	0	3.68771	0	0	0	0	2.25447
	lmo0175	peptidoglycan-binding protein	lmo0175	-	986928	1.8	1247	4.69127	5.57193	6.61471	5.72656	5.73011	5.6565	7.10858	4.90005	5.53392	4.24072	5.36311	3.82742	5.35664	2.84205	4.88627	4.22899	3.83766	3.08401	5.13301	3.06632	19.7421	15.9898	35.8354	20.8984	13.7561	37.299	27.2439	16.1745	26.5162	14.7364	26.7801	17.4026	32.7679	10.2055	26.2218	13.7333	30.2877	15.0705	37.6482	11.6083
	lmo0176	glucose transporter	lmo0176	+	986935	1.2	860	128.491	98.7114	78.4305	63.4456	79.7076	72.3484	73.4034	70.5353	75.5135	71.2386	129.967	100.082	38.0621	38.1988	39.9955	30.4039	31.2362	40.1833	36.9821	43.9742	11.783	13.037	19.0456	3.95111	9.96958	22.827	11.0571	4.04216	15.904	10.2528	14.8419	13.5133	22.9293	8.32083	22.2805	10.3512	12.5432	13.3493	15.7647	9.61486
	lmo0177	methionyl-tRNA synthetase	metS	+	986940	3.7.2	1994	452.704	337.457	375.843	351.636	326.483	357.455	374.015	371.191	347.93	358.86	443.799	385.131	202.002	234.454	211.33	195.582	192.204	216.474	206.671	227.449	5.08528	1.8755	13.4504	1.13681	3.8724	5.7036	8.18056	2.44232	4.57588	2.94993	4.92726	2.33281	13.43	3.19208	10.7471	2.4055	9.47344	3.66627	9.42055	3.80377
	lmo0178	xylose repressor	lmo0178	+	986964	3.5.2	1214	510.593	494.32	359.55	399.517	359.932	370.88	379.263	373.667	342.316	351.728	67.4251	19.4996	34.2089	11.5708	34.6409	8.60083	28.8668	11.2938	31.3244	11.2622	4.77138	4.10602	20.8583	9.33307	4.94541	20.4331	11.1936	2.86444	8.45267	1.8164	9.70853	5.10723	29.0154	7.20682	23.2189	7.89954	18.8884	8.59989	23.2025	8.51687
	lmo0179	sugar ABC transporter permease	lmo0179	+	986967	1.2	878	282.601	274.834	307.974	266.135	254.04	228.886	267.165	239.899	248.568	241.282	39.421	13.4043	20.0053	5.06225	22.921	6.24447	17.352	6.23484	20.3631	6.00261	29.6786	14.1889	35.6153	5.16026	8.78889	25.8901	20.114	3.95939	15.5783	6.69524	24.6027	7.94192	43.3152	21.7345	29.5269	14.8189	36.8591	16.6421	48.7014	16.4814
	lmo0180	sugar ABC transporter permease	lmo0180	+	986972	1.2	848	112.306	111.937	148.479	127.768	121.727	95.8519	129.797	101.151	118.158	101.38	16.999	5.77621	11.5543	2.65854	12.1823	2.73525	8.33166	4.82905	7.98919	3.07321	13.6566	7.34514	35.1179	20.0348	5.05525	26.8049	19.2229	9.8383	26.8813	10.3977	30.1033	17.3587	58.1334	21.5649	55.8239	20.1875	23.851	16.6148	39.354	11.3759
	lmo0181	sugar ABC transporter substrate-binding protein	lmo0181	+	986977	1.2	1256	179.109	166.166	194.003	209.409	175.536	178.932	191.491	189.44	176.594	169.124	29.3968	9.22138	17.3422	8.25988	22.6393	6.2141	18.4647	7.62155	17.8869	7.79541	12.6829	13.8909	43.8806	12.6297	8.87745	26.3338	25.9669	7.19871	28.1419	4.09664	34.4085	35.1732	44.8735	13.2988	49.3749	11.9988	33.2927	19.9501	39.8706	15.3669
	lmo0182	alpha-glucosidase	lmo0182	+	986983	2.1.1	3302	51.726	37.9991	73.0423	66.5182	70.3468	56.9536	79.2672	57.8252	71.2816	54.1411	12.2639	3.9528	11.8577	4.76392	10.9325	3.94675	8.52163	3.6731	9.45006	4.07256	19.7453	8.68474	13.9913	5.14972	3.63831	14.4062	8.6468	3.79324	19.0012	7.127	24.7012	26.0667	37.9968	18.7981	43.3884	18.2652	36.7838	19.7715	35.4043	15.4557
	lmo0183	alpha-glucosidase	lmo0183	+	987006	2.1.1	2291	40.5388	30.152	78.3943	62.6404	73.2963	56.8085	86.9454	54.3508	71.648	50.095	9.42989	4.83498	10.684	3.99537	10.1728	3.52313	8.48706	3.86959	8.57663	3.99696	12.0143	4.35324	14.9596	3.46325	3.74512	13.9909	16.0212	5.16275	16.4296	2.88864	13.2952	7.10684	34.4539	10.4192	25.1093	10.1698	30.0385	12.3089	27.3327	10.2336
	lmo0184	oligo-1,6-glucosidase	lmo0184	+	987008	2.1.1	1661	51.6508	41.8397	136.615	113.846	94.7647	95.883	116.418	103.723	101.283	94.7266	21.0168	14.3701	21.292	12.2614	22.1946	10.7652	16.3592	11.9314	17.4203	9.69843	14.8244	10.5059	14.3514	6.82291	4.1318	23.0287	13.9111	6.70094	18.5379	2.21312	23.0665	13.5344	28.8478	13.8897	27.1586	11.5499	30.0534	9.74473	19.475	11.6223
	lmo0185	hypothetical protein	lmo0185	+	987009	5.2	773	153.445	153.73	129.14	130.184	142.314	138.244	138.395	149.163	147.543	144.097	105.842	130.668	140.915	137.809	143.824	154.447	131.468	129.722	144.189	120.532	44.9397	27.3934	44.2989	10.2555	16.6353	54.7952	35.1426	11.6909	30.9603	13.3062	52.0704	18.0386	49.1913	21.5976	52.4856	11.5147	36.627	20.2497	37.7714	23.1738
	lmo0186	hypothetical protein	lmo0186	+	987011	5.2	1226	2312.47	2878.14	2792.21	2026.38	2395.85	2073.38	2064.68	1708.67	3194.62	1977.31	2882.86	3398.58	1386.54	1760.43	1725.48	1560.19	1277.11	1499.7	1445.1	1994.04	5.90589	6.0988	18.2244	2.77254	5.59662	16.018	4.43364	2.26914	17.67	5.39589	6.40905	6.95377	22.9853	2.59503	18.3935	7.82228	14.3028	5.53526	11.0623	6.18462
	lmo0187	hypothetical protein	lmo0187	+	987012	5.2	575	80.7873	74.6707	71.7884	62.5292	88.4085	61.1653	74.973	71.6632	68.1864	75.1501	124.31	123.286	67.3655	80.8347	77.3261	71.8365	63.5773	67.6919	78.0688	89.8911	22.6454	4.33057	31.0574	5.90608	20.8634	34.1217	25.9726	8.45906	15.8487	12.7715	11.946	24.2394	41.619	15.2019	52.8957	20.2338	39.8427	19.0474	36.2538	27.5467
	lmo01876	pseudo	lmo01876	-	3167621	3.6	440	92.4145	73.9742	49.9178	45.0874	62.6402	45.7993	50.7076	48.5338	58.055	47.3722	98.1777	80.8741	64.9197	41.6763	67.7834	64.6259	85.713	45.2505	70.2094	49.0408	16.432	0	3.38039	2.57136	3.89289	21.1107	9.25182	0	15.5253	0	46.809	33.4185	22.3833	12.6353	23.0294	6.2183	15.3057	17.7702	26.0436	10.9503
	lmo0188	dimethyladenosine transferase	ksgA	+	987014	4.5	887	162.773	144.532	166.832	172.597	171.713	142.8	171.984	178.457	174.245	169.011	190.71	178.155	127.898	136.748	128.524	133.133	117.08	125.129	134.378	143.647	16.321	16.8541	41.9694	8.93893	12.5664	33.7819	21.4417	10.1901	26.9857	7.45581	15.4976	19.2168	30.1721	18.8249	39.3938	10.8085	47.1272	16.4734	36.4498	12.43
	lmo0189	Veg protein	lmo0189	+	987015	5.2	257	23486.3	30079.7	11879.4	22674.4	22448.7	20327.2	17100.8	21300.6	23185.2	25667.3	14994.5	16866.8	15601.9	18614.5	17404.8	24143	16832.9	19385.2	17685.6	22496.5	5.61746	48.3413	17.3343	30.7666	26.6165	32.0752	5.27139	40.4686	53.0749	25.6619	15.2401	15.0322	32.7942	21.5976	26.2428	29.2296	26.1621	24.2997	28.3286	18.7173
	lmo0190	4-diphosphocytidyl-2-C-methyl-D-erythritol kinase	ipk	+	987016	2.1.1	881	261.554	208.782	182.47	113.922	220.614	148.885	169.247	145.183	206.277	150.201	255.246	291.58	230.597	250.131	258.729	217.873	212.445	200.591	266.027	266.372	11.5024	1.41406	21.9726	3.85703	8.75899	12.901	12.3358	5.52428	10.3502	3.33624	14.4885	3.51774	25.5809	14.4404	35.8235	10.882	24.4892	15.4008	34.3302	19.554
	lmo0191	phospho-beta-glucosidase	lmo0191	+	987017	3.5.2	737	715.43	640.726	533.897	415.259	555.687	441.163	521.473	415.528	575.102	414.426	665.839	822.684	734.418	632.216	783.2	589.209	682.118	601.454	758.328	668.591	7.85532	6.75992	8.07996	3.07308	3.48935	25.2299	18.4284	3.77268	15.4622	3.98721	5.32785	7.35722	19.1077	17.258	24.4648	13.0053	21.9507	13.4504	33.9548	11.2173
	lmo0192	PurR family transcriptional regulator	lmo0192	+	987018	5.2	818	183.914	200.838	137.118	132.102	186.18	136.315	163.198	133.371	172.741	127.541	186.262	200.319	136.101	120.394	161.617	125.597	126.224	113.144	148.153	111.29	19.4656	4.56851	27.3032	4.15373	5.24042	22.7346	21.5876	5.09934	19.5062	4.49109	14.4028	7.57666	41.3231	16.5231	33.0679	10.882	28.0213	9.56856	20.3978	5.89629
	lmo0193	lmo0193	lmo0193	+	987019	1.2	677	509.368	555.233	363.298	365.697	591.083	345.716	317.172	297.179	411.363	316.017	294.512	280.398	143.077	190.898	158.633	148.759	128.348	155.062	136.909	242.871	4.27524	5.5186	10.9938	3.34504	2.5321	6.10281	8.0237	2.05327	13.4644	5.42507	1.44984	3.43213	29.1181	2.34816	23.3011	3.03348	13.9377	5.39396	27.7197	3.05251
	lmo0194	ABC transporter, ATP-binding protein	lmo0194	+	987020	1.2	692	293.936	279.474	268.615	215.343	381.892	218.352	208.105	201.742	261.025	218.176	156.343	151.087	95.627	122.556	99.5554	95.3504	82.5081	96.348	92.8918	150.517	4.1827	0	2.15116	3.27263	3.71594	4.47803	7.85003	2.00883	3.29325	4.24612	5.67381	4.47712	16.2788	10.338	16.2834	2.96782	7.79201	5.2772	3.01331	4.97739
	lmo0195	ABC transporter permease	lmo0195	+	987022	1.7	1208	359.107	380.959	394.429	344.26	523.139	348.554	327.658	298.385	375.636	317.301	256.103	245.166	174.117	215.602	181.234	160.953	159.068	183.778	172.62	270.483	2.39753	4.1264	8.63133	3.75175	1.41999	4.27802	2.24982	3.45439	1.88769	2.43388	3.25224	4.49101	9.33101	5.26733	9.33367	0.567053	3.34979	1.29639	5.18169	3.99426
	lmo0196	regulatory protein SpoVG	lmo0196	+	987023	1.7	308	1228.62	916.834	2142.07	971.174	1826.61	1269.2	2029.89	1423.21	1518.48	906.86	1938.18	2024.63	3123.14	2303.64	2973.77	2415.99	2721.74	2214.56	3002.8	1851.46	23.4515	8.07252	33.7711	7.3396	13.8897	36.8242	22.0068	15.7683	18.4646	11.9036	25.4495	10.0409	54.7631	12.8807	36.5191	17.7493	39.3194	16.9075	37.169	11.1629
	lmo0197	regulatory protein SpoVG	lmo0197	+	987024	1.1	308	897.411	709.574	1764.2	1124.37	1478.54	1046.67	1573.14	1096.67	1418.02	922.546	1233.53	1177.31	2024.95	1507.66	1833.02	1744.06	1848.99	1452.05	1949.97	1238.81	18.7612	4.03626	4.82444	0	0	6.69531	17.6054	4.50524	7.38582	9.52285	25.4495	12.5511	13.6908	5.15227	7.30382	17.7493	13.1065	1.69075	13.516	2.23258
	lmo0198	bifunctional N-acetylglucosamine-1-phosphate uridyltransferase/glucosamine-1-phosphate acetyltransferase	glmU	+	987026		1373	928.192	754.021	633.071	561.187	602.983	594.984	608.264	652.68	612.667	630.688	811.831	686.851	353.113	451.608	383.338	396.333	335.971	372.286	371.567	460.39	17.9317	18.1544	16.2746	8.25304	8.12151	15.81	11.8779	11.6517	14.1185	9.63721	12.1622	11.2906	56.447	23.7533	37.7789	17.4635	49.1254	22.4339	44.0745	16.0668
	lmo0199	ribose-phosphate pyrophosphokinase	prs	+	987027	3.5.2	956	861.81	753.174	656.67	665.528	612.021	606.035	625.772	680.869	691.413	697.157	979.509	894.299	447.221	616.18	485.089	560.151	449.413	560.864	495.541	596.595	16.6587	11.7292	18.6928	13.0341	8.07255	18.3754	5.6845	12.3647	11.9238	7.68694	14.3802	16.2103	98.7252	38.2625	71.9278	47.9969	76.1736	52.954	64.3704	28.8345
	lmo0200	listeriolysin positive regulatory protein	prfA	-	987031	2.4	713	24.4931	30.9008	16.7699	13.2799	13.8119	10.3447	14.2734	10.4107	11.7245	9.67508	39.7426	47.9	134.846	66.566	119.486	97.7203	125.901	120.76	116.372	72.0299	69.0146	66.3778	273.514	222.347	114.21	152.121	287.623	145.256	145.436	149.395	52.3159	43.4544	140.225	52.3995	102.729	93.1373	96.4261	79.7567	95.0521	51.2086
	lmo0201	phosphatidylinositol-specific phospholipase c	plcA	-	987032	4.5	953	18.0922	13.4983	15.2016	13.5734	14.9315	15.5531	15.8318	14.478	14.6981	14.4822	20.8284	16.2225	12.5677	8.65256	12.2829	8.90695	10.1179	9.64756	9.01902	8.63033	53.1716	30.0689	87.5075	53.489	36.8906	58.5524	62.7262	53.2624	49.0414	28.5311	35.0331	19.5135	54.6913	27.5355	39.0341	30.1822	35.3764	27.9294	30.6447	23.1402
	lmo0202	listeriolysin O precursor	hly	+	987033	2.2	1589	35.5787	39.199	29.7483	39.8303	21.9076	39.5473	34.2613	37.1345	23.1659	29.852	46.4803	39.7351	22.439	18.4137	21.3572	20.1817	20.2513	21.3123	19.1177	18.306	24.6109	15.6881	30.9402	12.8374	15.656	26.6739	21.3839	10.9443	26.5541	14.3427	12.9829	4.87837	26.6066	7.00903	24.8399	5.17409	18.6788	9.85742	22.3269	9.11144
	lmo0203	Zinc metalloproteinase precursor	mpl	+	987034	1.8	1532	3.71992	3.24804	3.83254	5.21583	4.66483	3.66687	5.11745	4.05786	4.41409	4.28816	5.63948	4.23758	4.59778	3.49156	4.48485	3.06407	4.66227	3.32936	4.30164	3.10141	25.5259	11.39	79.7402	14.7941	16.7981	58.0304	52.3425	20.4323	69.2258	16.7954	29.4961	20.239	54.2719	19.7319	69.1934	20.5715	65.1647	26.923	57.2115	26.1006
	lmo0204	actin-assembly inducing protein precursor	actA	+	987035	2.4	1919	6.96988	6.57281	7.16593	7.29712	6.1876	6.50236	7.94281	6.72701	7.7391	5.86113	10.2765	6.53469	5.90394	6.75115	7.09947	6.37732	7.59857	5.88309	6.77105	5.34515	29.439	18.838	48.1389	10.0403	16.0946	47.4112	32.5838	10.5134	36.254	11.4944	29.1825	22.2195	58.0218	17.8277	55.2466	16.068	32.3429	19.3195	53.2931	17.606
	lmo0205	phospholipase C	plcB	+	987036	6	869	9.52623	7.89416	10.0016	7.56399	8.81634	6.38614	10.0286	7.63499	9.46182	7.04376	13.1427	9.15062	11.359	6.96773	11.6821	7.03704	12.1958	7.26107	10.8283	5.93142	36.6491	15.7693	47.9783	6.51706	4.93323	30.9139	25.0118	8.00069	51.1532	6.76451	18.0779	16.0482	27.5546	7.31978	18.1588	10.2441	26.3786	12.6107	22.8024	2.37885
	lmo0206	lmo0206	orfX	+	987037	5.2	323	4.69352	7.41905	7.11572	3.49432	5.33989	1.81567	4.07324	1.46438	5.81341	1.71944	6.02522	9.23874	9.19513	1.79135	7.38086	2.60631	2.729	3.22803	6.20286	1.07373	8.94633	0	23.0054	3.4999	2.64932	6.38534	0	0	0	0	15.1696	4.78803	17.4093	0	6.96568	2.11595	4.16656	3.22496	9.66769	0
	lmo0207	Uncharacterized lipoprotein Lmo0207 precursor.	lmo0207	+	987038	5.2	461	21.3952	29.7312	12.2341	9.80224	9.98628	6.22515	9.20445	5.70539	11.6268	6.02919	29.1256	32.8091	12.2679	8.23556	15.7874	8.45359	10.6856	8.05919	10.7392	10.793	12.5481	5.39915	6.45348	9.8179	5.5739	20.1512	17.6626	9.03974	12.3497	4.77688	8.51072	25.1838	21.3659	1.723	12.2126	5.93565	11.688	13.57	11.2999	5.97287
	lmo0208	hypothetical protein	lmo0208	-	987041	6	332	324.462	357.575	85.9842	101.359	112.744	126.802	101.941	122.692	95.3189	112.256	338.761	319.589	121.325	105.544	135.908	126.001	127.894	136.813	137.113	108.998	13.0568	7.49072	13.4302	10.2159	2.57772	24.8511	4.08414	12.5416	20.5605	0	5.90383	6.98794	0	0	13.5548	12.3526	4.05395	1.5689	9.4064	6.21501
	lmo0209	lmo0209	lmo0209	-	987042	2.1.1	674	71.4167	96.4052	55.1996	75.3724	58.2689	67.2039	64.8459	69.8218	64.6968	61.1569	68.9974	78.5018	58.4541	40.6995	58.6336	60.7531	60.1473	57.7018	54.8023	48.8761	4.29424	5.54313	17.6682	1.67995	0	10.7274	8.05936	5.156	16.9053	5.44919	10.194	5.74564	20.8911	7.07579	13.3741	4.06262	11.9997	3.09596	20.1088	5.11012
	lmo0210	L-lactate dehydrogenase	ldh	-	987043	4.1	941	1651.22	2742.43	463.199	947.146	489.467	1146.72	602.346	1193.59	553.274	967.114	1416.76	2493.85	631.374	729.707	623.3	726.171	651.259	873.035	690.577	759.358	6.15416	7.94398	9.49524	4.81515	1.82247	27.4529	21.6563	5.91134	18.1705	5.46654	12.5221	4.94052	8.98184	5.91527	25.1563	6.55	20.0632	6.10072	28.8183	15.3792
	lmo0211	50S ribosomal protein L25	ctc	+	987044	6	623	1376.06	2437.89	1046.55	1643.13	1662.56	2763.73	1688.79	3317.76	1495.72	3226.7	1534.3	2333.1	6595.18	7981.19	7069.58	10337.9	8674.53	9449.09	8200.54	8230.92	16.2582	3.99745	23.8903	1.81726	11.0049	18.2351	21.7952	8.92384	25.6018	11.7891	6.30121	4.97219	15.819	14.0325	19.8924	16.48	12.9804	16.745	33.4651	9.94999
	lmo0212	lmo0212	lmo0212	+	987045	3.7.5	584	139.593	138.386	70.0483	112.006	83.3023	103.577	93.2458	106.517	89.914	102.468	97.6085	88.5104	41.9836	35.7168	44.7621	43.3951	37.9122	42.0499	42.1914	40.7356	14.8647	4.26395	12.7415	3.87681	2.93464	28.292	13.9489	2.37969	11.7037	3.77251	10.0819	9.28141	14.4631	4.08218	21.2185	9.37528	16.1534	9.82372	16.0632	5.89629
	lmo0213	peptidyl-tRNA hydrolase	pth	+	987046	3.2	560	435.338	588.854	330.758	359.349	414.798	339.054	325.423	315.555	458.855	328.697	364.012	491.796	226.8	236.228	268.02	216.003	208.703	219.169	251.328	292.387	12.9172	2.22318	10.6293	14.1493	1.53009	20.2829	16.9699	4.96299	6.10219	5.24521	5.25662	2.76528	15.0818	11.3515	20.1148	3.66613	21.6572	7.45017	13.0281	12.2971
	lmo0214	transcription-repair coupling factor	mfd	+	987048	5.2	3539	103.421	84.8547	69.2656	45.6741	74.4181	42.4128	65.51	40.8339	74.9634	40.5705	89.632	90.7109	48.1142	41.0432	52.7932	32.8594	43.4397	34.0119	46.0562	41.0291	51.5855	37.3457	43.375	30.4313	33.7048	52.8901	40.7237	23.3986	44.8063	23.6901	35.5431	28.7038	54.5736	23.3861	56.422	23.2396	47.2869	25.9746	51.6156	21.4365
	lmo0215	hypothetical protein	lmo0215	+	987049	5.2	1589	99.5629	72.8906	94.4836	59.9012	104.533	65.9396	97.481	63.4271	103.15	59.3887	101.599	92.8888	74.4463	62.9474	78.3221	52.0144	67.288	53.8597	77.1422	64.8004	41.0181	31.3762	38.4408	42.078	40.4897	65.7088	48.7553	37.6485	44.4961	49.5053	49.4585	34.1486	59.4214	27.5355	61.7449	29.751	44.9988	28.5865	55.1605	34.2764
	lmo0216	hypothetical protein	lmo0216	+	987050	1.7	278	378.813	391.09	376.119	307.134	409.07	261.222	377.628	243.938	394.562	252.191	446.31	462.026	317.221	235.303	323.782	244.026	295.261	232.718	317.396	255.201	5.19464	0	10.6864	4.0644	6.15327	3.70762	0	2.49484	20.45	0	0	2.78015	10.1086	2.85314	12.1338	2.45723	9.67717	3.74511	11.227	0
	lmo0217	DivIC protein	lmo0217	+	987052	2.3	386	857.408	1076.11	564.411	895.744	559.273	640.129	685.44	646.508	639.205	601.579	778.094	771.83	541.881	543.404	532.04	562.827	516.543	481.268	524.664	447.37	183.504	119.242	161.787	90.8346	75.4133	128.301	66.7709	57.5553	123.841	70.3325	149.861	114.245	120.245	71.992	104.971	67.3167	97.6719	72.8991	80.9388	85.5648
	lmo0218	hypothetical protein	lmo0218	+	987053	2.3	428	1271.68	1395.2	1043.1	867.098	1182.86	997.83	1058.59	964.158	1185.12	965.246	1239.2	1341.61	1126.88	1095.4	1160.3	1128.39	1072.27	968.941	1247.3	912.968	6.75667	0	41.6994	15.8597	8.00355	16.8787	41.2127	11.3576	26.5993	10.2887	18.3308	12.6565	29.5836	9.27769	44.7168	15.9806	44.0548	13.396	29.2059	12.8646
	lmo0219	hypothetical protein	lmo0219	+	987055	1.7	1946	561.144	602.045	521.397	426.704	478.22	415.349	473.424	398.456	502.945	379.095	523.386	632.729	453.301	366.595	464.8	336.509	383.743	346.2	416.403	338.179	29.0308	17.9362	30.6267	11.0659	7.49485	27.6272	17.463	7.15008	21.0991	13.2241	17.6706	21.9113	29.695	14.7185	31.2973	11.2677	24.9608	13.685	27.3496	10.6297
	lmo0220	cell division protein FtsH	ftsH	+	987058	5.2	2075	2418.03	2677.78	2369.65	2561.67	2479.04	2491.33	2321.28	2296.14	2626.62	2214.46	2410.56	2755.16	2247.19	2398.04	2412.28	2192.26	2313.74	2133.18	2269.5	2241.27	44.6799	15.6201	41.6492	25.6727	20.2604	32.8864	25.5495	22.1291	108.285	25.1592	29.8306	19.0553	50.9447	34.5098	44.5723	25.0978	46.8196	22.6493	69.9091	20.9352
	lmo0221	Type III pantothenate kinase	lmo0221	+	987060	5.2	779	229.372	255.786	274.314	242.126	296.043	234.975	249.94	227.024	302.566	220.053	224.625	299.253	214.545	261.84	240.366	238.853	196.11	219.206	221.022	268.2	39.0198	15.9898	40.1357	13.0842	11.0049	55.6998	48.8211	16.9553	42.4259	15.0901	28.9856	20.8832	63.2759	28.5753	70.8892	29.0048	48.4603	35.4993	50.8669	30.9555
	lmo0222	heat shock protein 33	hslO	+	987062	2.2	884	392.204	449.131	451.351	417.524	483.197	467.741	425.743	413.879	529.71	412.378	409.184	596.439	373.911	587.611	420.454	447.806	373.744	440.335	424.157	568.478	24.5645	23.9576	47.1651	28.189	13.5789	47.9225	27.6614	14.1572	42.5499	12.4685	35.5431	12.2703	43.0215	22.4866	63.7537	17.817	24.4061	22.4326	47.1914	23.3853
	lmo0223	cysteine synthase	cysK	+	987069	2.5	926	1498.39	1584.18	1279.47	1253.76	1454.9	1541.31	1286.67	1475.93	1503.43	1526.94	1162.68	1371.46	1081.18	1173.32	1156.75	1130.42	1098.33	1051.7	1214.55	1249.63	104.75	34.9809	49.8526	37.9212	35.1871	70.3008	54.2833	38.2946	59.0866	37.2978	63.6238	43.5106	74.5386	48.0879	92.5151	39.9359	91.7452	39.4509	75.4643	49.8609
	lmo0224	dihydropteroate synthases	sul	+	987081	2.5	815	102.685	82.3771	64.2541	36.4205	107.497	41.3332	57.8639	39.7968	61.4682	36.0475	35.0311	31.6881	46.3945	22.8397	40.5161	18.8862	37.8348	18.2517	37.7901	19.3271	83.4772	16.8128	45.6726	29.183	16.831	41.8334	45.0006	17.0603	30.7652	9.91672	49.3903	15.209	67.3968	23.4125	80.2078	20.1637	51.2854	35.8539	61.4183	26.2082
	lmo0225	dihydroneopterin aldolase	folA	+	987089	2.5	374	129.564	115.61	87.6583	62.2687	123.954	48.6309	85.0492	41.7525	96.177	45.162	55.9622	65.047	89.9095	40.9288	76.2059	41.5186	68.5744	32.3527	64.9811	31.6964	7.72963	6.65176	19.8767	6.04783	0	30.3432	21.7603	7.42464	9.12888	5.88512	18.3491	16.5474	22.5624	8.49094	36.1101	1.82818	21.5994	5.57273	22.2744	7.35857
	lmo0226	7,8-dihydro-6-hydroxymethylpterin pyrophosphokinase	folK	+	987097	5.2	479	108.825	130.204	91.414	56.9028	119.306	51.8827	83.8577	43.8217	84.8758	45.4963	67.5416	65.6786	95.6742	50.9191	92.1685	50.6887	78.9023	45.0601	82.2993	42.6404	18.1163	2.59834	18.6344	2.36243	12.5181	19.3955	11.3335	2.90025	19.0185	3.06517	10.2395	8.0798	49.9428	4.97516	44.6674	7.14132	25.3118	7.61896	32.6285	8.62333
	lmo0227	hypothetical protein	lmo0227	+	987098	3.7.2	995	392.161	274.786	266.869	200.273	354.131	220.308	282.378	227.491	294.803	229.663	315.562	223.74	187.132	203.437	199.043	183.504	179.991	162.217	197.177	220.806	7.27563	3.75664	23.9478	6.83113	2.58549	14.5401	21.8477	2.79542	16.0397	5.17016	16.7779	5.45143	24.0688	15.9845	43.053	8.94816	25.7523	11.0154	25.1593	12.4675
	lmo0228	lysyl-tRNA synthetase	lysS	+	987100	3.5.2	1496	1018.02	787.723	823.99	845.716	862.558	834.538	849.061	887.081	909.548	910.819	806.046	634.203	485.931	644.714	518.177	569.733	473.944	559.034	502.306	646.276	17.4265	4.99882	24.8957	5.30245	5.16061	16.584	17.2614	5.57964	19.8189	5.89691	19.6992	9.32658	44.2732	13.2937	37.6901	14.1968	23.4463	9.77182	26.5038	10.1383
	lmo0229	CtsR family transcriptional regulator	lmo0229	+	987186	5.2	458	19.5471	45.2624	129.46	67.985	66.2146	45.5697	73.3182	39.2799	60.1859	29.7361	16.5567	38.435	194.404	44.2569	129.86	71.8652	115.742	65.2595	105.084	30.8223	0	0	9.74348	2.47052	1.87011	2.25365	2.963	1.51647	2.48608	1.6027	0	1.68989	12.2889	0	7.37543	2.98722	5.8822	2.27644	9.099	0
	lmo0230	hypothetical protein	lmo0230	+	987194	2.2	518	33.1097	42.3455	90.4199	72.396	73.0052	53.2736	89.7054	50.3815	70.1641	34.993	18.404	25.1563	146.308	52.4358	115.884	73.6246	119.256	57.4732	100.438	37.0901	0	0	5.74471	2.18491	3.30783	3.98623	5.24092	1.34116	8.79468	1.41742	0	1.49453	16.3023	3.06754	23.9169	7.92563	15.6065	8.05308	12.0706	3.98767
	lmo0231	ATP:guanido phosphotransferase	lmo0231	+	987202	4.1	1022	23.1153	25.2596	66.0831	35.4145	55.9796	29.2637	63.7861	23.9111	49.3713	20.966	15.1299	19.9843	130.127	32.7171	100.401	50.8174	112.794	40.2404	91.6582	26.0151	0	0	7.28618	3.32542	0.839082	4.04468	3.98832	1.36082	2.23091	0.719101	3.84355	3.03289	17.9198	3.11252	12.1338	2.68061	3.95884	2.04279	10.2064	0.674356
	lmo0232	endopeptidase Clp ATP-binding chain C	clpC	+	987203	3.2	2462	122.805	195.504	281.781	268.129	258.523	231.786	277.675	203.808	261.228	187.237	118.352	192.332	430.88	245.387	377.085	272.353	417.927	276.456	373.075	222.32	2.94216	6.58289	11.4999	1.8416	2.43957	9.23969	6.62615	2.82607	10.6559	4.18147	5.98653	4.72388	12.0232	6.46387	18.7844	4.45354	13.7024	6.78773	13.9893	6.16202
	lmo0233	DNA repair protein RadA	lmo0233	+	987204	5.2	1373	66.7936	30.9906	73.5588	37.6459	63.0014	35.1558	78.014	36.4113	60.3173	29.0712	38.2599	25.6793	57.1686	21.1677	40.988	23.3928	40.9708	17.4466	40.9094	16.3732	58.0144	43.5705	27.1243	14.8555	22.4903	35.3843	15.8372	18.2374	39.0336	21.416	10.0159	10.726	17.4473	12.7457	16.4256	11.476	17.6851	7.98494	13.6783	15.0626
	lmo02333	hypothetical protein	lmo02333	+	984719	2.3	476	132.623	134.443	39.9139	38.7177	58.3962	40.4243	34.4304	36.1399	58.4997	38.3077	5.11575	2.53685	3.35138	3.6503	4.51208	3.09807	2.93497	2.36804	3.6866	2.55263	9.11513	10.4587	9.37581	21.3956	16.1959	8.67443	11.4048	10.2147	9.56906	13.88	28.8508	24.3919	50.2569	10.0129	40.217	15.8097	22.6409	18.6196	21.8891	10.1238
	lmo0234	hypothetical protein	lmo0234	+	987212	5.2	1073	261.379	243.159	222.074	133.153	197.606	123.668	223.3	119.523	168.621	104.521	234.219	228.128	256.962	96.5528	239.919	125.114	237.24	119.274	217.65	76.4986	10.7956	10.4514	12.4923	10.5584	3.99619	11.5578	3.79893	7.12911	4.24994	4.10972	7.32207	5.77773	15.7559	8.15297	22.0645	7.02164	11.3126	4.86446	5.83302	5.13867
	lmo0235	2-C-methyl-D-erythritol 4-phosphate cytidylyltransferase	ispD	+	987220	3.7.2	698	186.879	123.922	110.439	72.4808	167.485	97.7188	151.147	106.491	127.146	95.9578	161.484	94.2113	122.458	91.3358	155.663	103.366	159.91	88.0397	150.586	73.6586	6.2202	8.92135	12.7962	1.62227	8.59609	32.557	21.4023	3.98318	26.1198	6.31451	5.62511	6.65803	38.3302	14.8045	37.1304	7.84626	25.1066	11.2112	34.3556	12.8301
	lmo0236	2-C-methyl-D-erythritol 2,4-cyclodiphosphate synthase	ispF	+	987228	2.2	473	386.111	238.892	281.95	184.364	296.871	216.363	318.795	196.858	244.31	185.934	266.232	205.039	298.321	195.098	269.789	182.273	270.171	165.4	279.57	154.617	0	7.8937	9.43515	2.39234	3.62186	28.3703	5.73847	1.46848	9.62962	4.65595	12.4429	3.27283	8.925	13.435	16.6647	11.5708	22.7842	11.022	33.0415	8.73248
	lmo0237	glutamyl-tRNA synthetase	gltX	+	987229	3.7.2	1475	641.507	457.687	642.833	455.625	528.102	455.378	583.615	426.885	517.913	391.251	694.606	592.094	663.034	465.664	639.853	481.043	631.249	474.162	625.274	416.514	1.96383	5.91493	19.1899	5.3779	2.32624	17.5208	9.21421	3.77268	17.0084	2.99041	9.32374	4.20412	21.0185	8.08969	38.9908	5.10924	27.4383	9.55689	20.5144	6.07606
	lmo0238	serine O-acetyltransferase	cysE	+	987230	5.2	614	9.76711	7.39837	8.82775	6.78835	9.37736	4.46389	8.34516	5.5718	7.82683	5.43509	7.02872	7.14552	7.56178	4.29924	8.26297	5.66396	10.1838	6.32632	8.98658	4.71392	0	0	7.27197	9.21925	2.79148	25.2299	15.4799	3.39541	16.6992	7.17698	9.59013	5.04495	32.101	5.1774	33.0275	10.0327	35.121	7.64551	20.3729	11.2173
	lmo0239	cysteinyl-tRNA synthetase	cysS	+	987258	5.2	1415	15.948	7.6391	21.0612	10.6939	21.3822	9.04757	24.6465	9.60536	18.0807	9.04889	12.1124	9.71517	26.9411	7.69673	22.7994	12.7472	22.0113	9.27704	20.9346	7.3705	7.16465	0.880794	12.6335	0	1.8186	13.1495	6.72325	1.96627	8.86455	2.5976	5.55361	2.19113	19.9174	5.62165	20.72	4.35742	11.4404	4.05853	15.4847	4.38474
	lmo0240	hypothetical protein	lmo0240	+	987262	5.2	410	13.32	9.6084	22.7998	10.1578	25.6782	11.4506	25.8665	10.1331	22.405	11.2504	14.7583	9.60748	28.8181	13.9647	21.5284	10.9151	21.6926	10.5861	26.4357	9.02871	3.52629	0	7.25427	0	2.08852	7.55055	13.2362	0	13.8821	5.36964	11.9585	3.77451	10.2931	5.81041	5.4912	8.34023	6.56917	3.81345	15.2425	6.71403
	lmo0241	hypothetical protein	lmo0241	+	987267	3.5.1	755	10.2587	7.15408	21.6423	11.5125	22.6564	11.6722	22.5968	10.8783	19.5626	9.43233	10.9745	7.41346	19.7038	9.12736	18.1886	10.5416	18.9081	7.96863	18.1932	6.28897	7.66828	6.59897	5.91569	2.99991	0	12.3146	5.3969	2.76214	9.05643	4.86534	7.8015	5.13003	20.518	10.5294	13.4338	7.25468	5.357	4.83744	2.7622	8.21269
	lmo0242	hypothetical protein	lmo0242	+	987272	3.7.1	512	23.7146	9.70612	32.4738	14.3451	35.5243	12.8689	42.0186	14.798	27.7412	13.5745	20.1143	13.5322	33.5699	12.948	32.5146	15.8436	32.6044	12.2326	30.4838	11.7545	0	2.4312	5.8119	0	0	4.03285	0	1.35684	4.44877	4.30199	0	4.53603	2.74883	1.55171	13.1981	5.34555	0	6.11045	8.14121	0
	lmo0243	RNA polymerase factor sigma-70	sigH	+	987276	1.6	605	111.041	83.1573	70.1981	58.6163	71.4699	45.8411	82.6342	44.6274	72.6388	45.2297	96.5271	88.7012	62.8315	34.5855	55.1482	28.1308	46.4471	26.6476	43.2166	31.7653	9.56637	8.23237	12.2999	5.6137	9.91529	13.6558	6.73276	2.29723	11.2981	3.64178	8.11047	1.27997	20.9428	6.56787	14.8969	4.5252	13.366	2.58635	12.0607	7.96875
	lmo0244	50S ribosomal protein L33 type II	rpmG	+	987282	3.5.4	149	1502.96	1964.22	788.33	1093	1182.64	1097.24	873.953	1041.35	1154.31	1275.75	1849.91	2145.02	673.837	1162.08	837.389	936.63	695.077	919.262	803.053	1426.73	28.9861	16.6294	9.93835	7.55978	17.1676	6.89617	18.1336	4.6404	15.2148	4.90427	0	20.6843	28.203	15.9205	15.0459	9.14089	17.9995	6.96591	20.8822	9.19822
	lmo0245	preprotein translocase subunit SecE	secE	+	987283	6	179	263.166	406.829	279.717	184.762	103.487	171.399	162.115	177.776	204.244	122.561	453.182	662.005	199.826	169.103	190.648	175.046	131.811	153.861	149.683	218.396	16.1034	0	8.28196	6.29982	0	5.74681	0	3.867	6.3395	0	5.46105	8.61845	7.83416	0	0	0	0	5.80493	0	3.83259
	lmo0246	transcription antitermination protein NusG	nusG	+	987288	3.7.1	533	1513.72	1614.57	764.737	969.04	954.592	926.725	835.471	914.762	1152.36	957.498	1169.19	1266.37	553.824	705.993	618.226	672.769	509.987	591.335	579.584	759.62	18.9984	25.6915	19.5417	12.7412	14.4671	11.6228	20.3748	11.7313	25.6429	9.64322	16.5672	11.6204	7.92219	13.4162	23.245	7.703	7.58407	8.80522	17.5974	18.0864
	lmo0247	lmo0247	lmo0247	+	987292	3.7.1	470	42.7798	27.5227	31.8957	24.3378	31.223	27.4779	29.732	23.169	33.7696	28.0323	26.7928	22.5816	15.5819	19.4424	15.4857	11.9899	13.2974	13.1457	13.8675	18.8347	24.6167	15.888	18.9905	24.0757	21.8696	28.551	25.9876	7.38917	29.0729	17.1806	37.5664	23.0557	38.9213	11.8305	33.5418	17.4667	34.394	22.1844	24.3847	8.78811
	lmo0248	50S ribosomal protein L11	rplK	+	987298	3.7.1	425	17355.3	12859.2	11693.3	11425.6	13183.5	14404.9	12586.6	12952.4	13581.8	15570.3	14936.4	9496.59	7351.85	14560.6	8698.3	9608.17	7642.98	10253.4	8454.06	15452	6.80425	17.5663	38.4936	7.98569	22.1648	19.4258	31.9253	19.6073	50.8946	15.5417	34.6123	9.104	19.8613	5.60582	26.4892	14.4838	22.1825	11.0375	39.2154	16.194
	lmo0249	50S ribosomal protein L1	rplA	+	987301	3.7.1	689	7336.72	4386.14	5422.38	4338.1	5682.91	5545.15	5201.77	5560.43	6025.62	5809.39	6179.75	4259.18	3709.76	5784.81	4060.01	4609.88	3627.99	4337.6	4113.29	6345.08	6.30133	5.42263	12.9631	1.64343	4.97612	11.9933	5.91312	6.05269	8.26891	3.19843	4.27386	1.12415	12.2622	11.5366	19.6251	6.95503	15.6518	6.05731	13.6188	7.99845
	lmo0250	50S ribosomal protein L10	rplJ	+	987306	3.5.2	500	3721.32	2083.85	5947.43	5681.27	5372.82	6398.89	5990.14	6405.16	5467.67	5803.71	3325.43	1912.94	4782.33	7565.12	4515.38	5783.33	4369.66	5993.22	4854.58	6804.06	14.4641	4.97886	41.6578	13.5805	10.28	33.0356	13.573	9.72539	22.7766	7.34172	5.88616	10.8376	33.776	11.1221	60.8142	15.0524	35.029	19.8132	45.8492	12.3928
	lmo0251	50S ribosomal protein L7/L12	rplL	+	987315	4.2	362	4085.58	2637.9	6958.68	7987.49	5848.42	7781.74	7172.26	7388.91	7388.31	7158.32	4362.61	2450.51	6214.27	9651.97	5995.79	7099.56	6202.78	7866.65	6833.69	8684.73	3.99258	6.87165	24.6405	0	0	14.2483	3.74661	7.67008	6.28711	6.07967	5.41591	4.27361	3.88471	6.57873	15.5433	7.55446	11.1567	10.0747	11.5053	5.70137
	lmo0252	penicilinase repressor	lmo0252	+	987321	6	386	0	0	0	0	0	0	0	0	0	0	0	0	0	0	0	0	0	0	0	0	0	0	0	0	0	0	0	0	0	0	0	0	0	0	0	0	0	0	0	0
	lmo0253	penicillinase antirepressor	lmo0253	+	987325	5.2	1040	0	0	0	0	0	0	0	0	0	0	0	0	0	0	0	0	0	0	0	0	0	0	0	0	0	0	0	0	0	0	0	0	0	0	0	0	0	0	0	0
	lmo0254	lmo0254	lmo0254	+	987329	5.2	662	0	0	0	0	0	0	0	0	0	0	0	0	0	0	0	0	0	0	0	0	0	0	0	0	0	0	0	0	0	0	0	0	0	0	0	0	0	0	0	0
	lmo0255	hypothetical protein	lmo0255	+	987335	5.2	503	4.37503	14.3082	23.4622	6.17745	13.3879	3.24226	10.3286	3.76556	15.7793	3.53712	7.05504	28.5587	17.0126	2.94293	13.8787	3.66513	7.60223	4.81438	9.59505	2.41589	0	0	5.91569	2.24994	0	0	0	0	2.26411	0	0	1.53901	8.39375	1.57942	0	0	2.6785	0	2.07165	0
	lmo0256	hypothetical protein	lmo0256	+	987337	3.5.3	605	211.292	179.065	98.1792	76.2479	101.447	52.0971	97.9996	51.7609	103.836	58.008	141.972	177.402	56.2366	54.1662	61.2648	56.697	48.7573	44.3896	55.1348	58.7467	31.0907	14.4067	29.5199	16.8411	12.7482	30.7255	13.4655	6.89168	33.8944	7.28356	19.4651	26.8793	23.2698	21.0172	35.3802	15.8382	42.3256	15.5181	34.4591	14.7991
	lmo0257	hypothetical protein	lmo0257	+	987339	3.5.3	1178	163.356	90.8004	111.272	58.6965	116.173	57.3252	115.419	57.2339	121.238	58.8283	16.5579	13.1266	14.5451	6.67312	13.9955	8.95298	12.2493	7.48707	11.6126	6.49154	1.22927	2.1157	5.05769	0	2.18418	4.38688	1.15353	1.77114	4.83931	1.24791	2.50124	2.63159	5.98028	2.70068	12.4425	2.32593	8.01506	3.98812	6.19913	1.17026
	lmo0258	DNA-directed RNA polymerase subunit beta	rpoB	+	987342	5.2	3554	4024.49	2527.41	1764.38	1191.06	1764.52	1416.13	1523.18	1351.12	1852.79	1359.1	2205.87	1629.42	1279.27	1272.92	1339.92	964.535	1177.93	978.299	1308.65	1292.91	24.0532	8.06911	28.5151	13.0781	10.1412	23.5692	22.1888	10.1815	27.9259	13.8644	29.0334	14.1823	44.03	18.809	43.8045	17.7418	33.0371	21.4562	36.7127	16.8828
	lmo0259	DNA-directed RNA polymerase subunit beta'	rpoC	+	987344	2.1.1	3605	4013.1	2431.86	2473.02	1933.4	2390.33	2058.61	2189.5	2055.74	2516.96	2011.11	2628.49	1916.28	1973.63	2134.37	2019.05	1706.73	1828.16	1725.12	2002.72	1960.73	22.9092	11.7596	23.5643	9.74847	6.1891	17.7855	16.9719	11.1956	18.0375	8.77219	19.8997	15.7025	25.4187	14.7903	27.5382	14.0688	29.5749	15.5023	20.5579	13.0091
	lmo0260	hypothetical protein	lmo0260	+	987345	1.8	545	61.1344	81.9182	55.4375	72.1855	67.177	76.7369	57.0701	74.4421	64.6502	72.341	39.4571	51.0906	50.9712	49.1342	52.4487	65.5373	56.5444	54.861	57.1677	58.2998	31.8529	20.5583	24.5729	4.15373	6.28851	34.1019	27.3996	3.8245	35.5291	12.1259	25.2048	7.10312	36.1577	17.4951	41.3348	21.3455	44.5043	7.65485	24.8598	12.6349
	lmo0261	phospho-beta-glucosidase	lmo0261	+	987346	1.8	1460	49.8574	71.5114	64.2408	67.2243	61.026	79.9491	63.6328	78.6978	66.0365	74.6228	61.7033	77.5943	75.2502	73.2725	78.3629	76.1142	75.5492	78.6309	77.5915	70.9983	43.6478	8.53665	34.6924	17.0755	11.1631	33.2772	21.4103	13.8164	31.2419	8.55981	24.2215	18.051	40.5382	13.0764	47.1149	15.0158	34.188	14.3037	34.3034	16.0544
	lmo0262	internalin G	inlG	+	987350	1.8	1472	6.55564	4.25457	4.99844	4.70772	4.46332	3.63873	4.87793	3.79368	4.87805	3.02565	6.81584	5.75054	5.27837	3.67756	5.51986	4.83707	5.35241	4.68624	6.22497	3.42456	16.7265	16.9342	34.4098	9.23803	6.99292	25.2813	29.5455	5.198	27.1139	9.48891	20.6875	13.6912	35.4213	10.8082	20.6843	5.58507	18.3295	10.9951	15.5943	9.36682
	lmo0263	internalin H	inlH	+	987355	2.2	1646	48.6588	35.2361	13.6369	14.0918	11.9053	16.9065	14.6013	14.6278	13.8505	11.5005	47.9195	34.493	862.261	820.615	842.58	948.238	908.132	960.511	868.273	605.265	36.9586	21.9605	40.731	12.3931	16.1565	21.3543	24.7726	10.5656	32.5635	12.0597	29.8418	30.612	44.522	9.18305	36.3129	17.8988	25.4092	13.9572	34.8671	18.8488
	lmo0264	internalin E	inlE	+	987358	3.5.2	1499	4.66348	5.32264	3.22273	2.1228	3.30646	2.39668	2.19955	1.96813	2.13933	2.11697	4.41562	3.90622	19.038	16.982	19.0116	17.8389	19.0594	18.2402	16.7477	11.7122	51.2088	40.742	61.6178	21.1674	15.4509	42.0666	37.1738	13.9212	36.5155	21.0883	32.111	20.1672	53.5857	12.7364	43.633	10.9691	35.9991	14.9767	40.3723	12.4176
	lmo0265	succinyl-diaminopimelate desuccinylase	lmo0265	+	987360	5.2	1139	15.3404	12.5761	5.08852	4.28284	3.74354	6.42173	5.46671	4.39315	3.48804	3.07869	11.4977	15.9779	381.422	239.626	352.417	338.287	372.035	303.453	391.092	198.815	48.3102	35.0092	40.538	17.9048	17.3182	29.9439	44.1409	16.4856	17.0165	16.1325	17.2454	16.3297	21.0285	6.28441	25.7364	7.81787	11.8418	10.9988	20.1495	4.23602
	lmo0266	transcriptional regulator	lmo0266	+	987368	2.1.1	416	12.2167	14.4111	35.8478	35.2951	36.2344	34.6414	42.5492	26.6749	32.4547	24.5817	8.02537	9.01106	62.3829	27.9915	53.4767	33.2867	50.5357	31.2009	51.8095	23.3594	17.3778	14.9545	25.0246	13.5967	12.3508	27.287	13.0457	8.34604	16.4188	12.3489	14.1437	24.1813	30.4349	13.3625	46.0036	14.7964	6.47465	13.7815	22.5348	23.161
	lmo0267	hypothetical protein	lmo0267	+	987388	1.2	959	13.1477	14.0399	20.9942	15.405	25.7116	19.9497	27.0361	23.3935	21.8003	16.0746	7.18991	9.35422	36.4834	20.0855	34.8123	21.8258	37.2253	19.1309	32.8412	14.7973	4.52908	5.19669	12.4229	5.90608	7.15318	15.0854	11.3335	3.62531	15.4525	3.06517	7.16762	6.46384	23.5025	8.29194	12.9301	8.56959	11.2497	10.34	19.5771	10.0606
	lmo0268	phosphoglycerate mutase	lmo0268	+	987396	6	635	57.6241	53.0482	77.9957	51.9574	88.6824	48.3036	72.9724	48.6562	83.9105	48.0015	51.8518	45.463	69.9219	47.1497	63.0751	45.7242	63.2563	38.8095	65.4701	36.922	15.9515	5.88304	14.0637	10.6978	10.7972	21.1439	32.0759	15.3221	25.1188	10.41	18.547	10.9763	33.2582	5.00645	23.0656	8.62349	25.471	11.5003	34.4753	7.59287
	lmo0269	transporter	lmo0269	+	987397	2.1.1	1886	12.6524	14.5129	14.9766	16.5744	16.2896	16.5921	15.9303	17.5726	18.5585	17.5661	14.2618	14.3442	16.1732	15.9256	17.2036	17.1171	14.682	15.5857	17.6064	17.5142	19.2012	15.8627	19.7503	11.4178	14.5565	18.6383	20.9012	13.2794	21.77	12.4751	19.2743	13.5648	17.9351	14.3428	28.1064	14.1691	20.7467	10.7977	23.2393	12.43
	lmo0270	lmo0270	lmo0270	-	987398	5.2	629	170.536	245.283	193.6	275.177	152.507	332.838	227.868	314.884	165.433	280.317	194.221	269.917	183.275	189.883	178.596	205.582	185.494	234.61	190.705	204.775	4.60097	3.95938	18.9302	12.5996	12.2626	18.0614	17.2701	7.734	18.1129	7.0061	1.5603	3.69362	17.9067	3.7906	16.1206	5.44101	8.57121	3.3171	4.97195	7.66518
	lmo0271	phospho-beta-glucosidase	lmo0271	-	987399	5.2	1436	123.974	148.817	158.316	241.332	139.542	277.286	188.678	299.211	144.619	255.249	133.813	173.913	145.126	173.226	135.796	185.879	146.443	197.619	145.406	166.278	8.06851	9.54715	21.7855	15.7824	14.3362	23.0352	26.5	12.594	23.0287	8.19084	17.1014	4.31822	33.3647	16.6185	36.9079	13.8354	27.2436	10.907	21.0711	10.0816
	lmo0272	hypothetical protein	lmo0272	-	987400	5.1	812	473.512	439.91	534.5	594.105	512.44	579.995	562.738	648.5	577.994	661.459	313.442	268.306	214.327	298.329	227.08	313.551	211.442	271.595	229.586	281.776	3.56533	1.53408	12.8355	0	0	12.7236	15.0555	3.42465	9.82505	1.80969	4.83635	3.81629	32.9555	5.87473	31.9239	4.21628	18.2652	6.42612	11.5584	1.69709
	lmo0273	lmo0273	lmo0273	+	987401	1.1	503	654.746	817.439	338.21	565.939	455.988	604.488	489.079	741.187	473.239	785.352	724.456	723.823	291.521	426.725	362.862	497.829	354.819	530.329	379.191	513.433	0	0	2.95784	2.24994	3.40627	8.20973	2.69845	5.52428	2.26411	5.83841	7.8015	3.07802	8.39375	3.15883	4.47794	5.44101	16.071	3.10978	6.21494	2.73756
	lmo0274	lmo0274	lmo0274	-	987410	5.2	662	33.9463	38.5867	20.4155	17.2898	16.875	16.1685	18.689	14.7101	16.3091	14.0325	46.6906	51.6807	39.2363	26.7487	41.2994	30.807	35.4524	37.1028	39.0275	28.8595	480.916	474.051	1007.33	697.826	403.944	407.217	701.548	428.345	490.522	426.072	363.246	533.486	714.646	324.173	648.47	340.198	564.013	358.539	587.411	332.967
	lmo0275	hypothetical protein	lmo0275	-	987414	2.1.1	842	289.168	300.522	152.888	182.398	156.662	180.895	159.508	178.603	161.865	171.623	308.573	316.024	111.711	114.366	118.293	117.514	99.9923	121.387	112.272	123.116	36.1037	45.864	53.0517	22.8677	21.3832	44.1748	40.3327	21.468	35.1944	30.5426	48.9745	42.3255	56.8743	22.6627	49.5282	21.9577	40.0346	22.9305	40.8726	26.1871
	lmo0276	hypothetical protein	lmo0276	-	987415	1.2	821	117.475	145.275	82.423	95.9821	78.9992	84.6075	81.5242	92.0316	81.218	82.8868	112.045	138.766	65.0616	50.9946	57.9667	51.1085	54.4108	55.9331	57.2265	54.0312	88.1573	66.7603	74.3563	59.3195	19.8409	51.5954	57.9083	35.5651	56.9167	25.9532	81.3178	67.9411	85.7755	27.1152	70.0127	32.5269	44.3419	37.499	64.7806	23.4991
	lmo0277	oxidoreductase	lmo0277	+	987427	2.3	971	111.393	138.224	109.031	113.929	109.29	103.628	119.029	124.527	124.019	129.76	120.504	155.355	115.724	130.171	125.598	120.868	109.994	121.503	136.657	113.04	14.9106	6.41566	9.20218	9.33307	8.83108	14.8991	5.59678	4.29667	14.0878	4.54099	5.05652	1.59601	8.70463	6.55165	6.96568	4.93721	13.8885	2.68747	7.51931	2.83896
	lmo0278	sugar ABC transporter ATP-binding protein	lmo0278	-	987432	2.3	1100	127.554	178.56	92.3386	114.27	112.827	109.771	90.8986	124.205	100.808	129.433	26.8496	27.8239	16.6315	19.0947	21.5574	15.2917	15.3925	17.2129	20.022	19.3797	107.941	62.3036	150.294	123.593	114.607	108.046	149.466	116.326	86.0237	105.569	126.78	167.672	270.247	109.896	199.86	122.045	194.954	122.9	199.149	105.892
	lmo0279	anaerobic ribonucleoside triphosphate reductase	lmo0279	+	987434	5.1	2132	290.345	341.424	23.535	29.757	19.1154	54.4547	29.1829	41.5217	20.212	33.3527	491.213	477.707	29.0928	17.596	25.5621	23.9269	27.1864	23.6733	23.3785	25.3073	23.1019	7.60134	24.4615	4.78467	11.268	15.0338	16.5778	9.13721	19.2592	5.51816	11.5212	6.54566	21.8167	10.8227	21.1616	9.64229	15.1895	11.5119	24.4752	9.70276
	lmo0280	anaerobic ribonucleotide reductase activator protein	lmo0280	+	987436	5.2	551	438.992	494.565	37.4548	60.7612	42.8352	96.6251	39.1828	80.7002	45.3699	75.9953	691.646	533.505	37.3851	43.927	39.2068	42.643	40.3121	46.9132	37.0907	68.4851	7.87666	0	21.6051	12.3257	34.2108	22.4875	34.4932	22.6976	20.6723	18.6575	12.4654	9.83628	15.3277	18.747	10.2214	13.6617	9.78236	15.1433	32.1556	18.7464
	lmo0281	lmo0281	lmo0281	-	987437	1.2	671	93.0072	200.187	196.219	173.109	155.591	136.661	152.965	108.181	154.782	110.673	142.761	370.757	217.776	108.057	218.322	106.341	168.09	160.431	202.617	131.666	10.7835	9.27979	6.65515	1.68745	2.55471	0	2.02384	2.07161	5.09424	2.1894	24.8673	34.6277	8.39375	1.18456	8.39614	2.04038	14.0621	5.44212	9.32241	10.2659
	lmo0282	hypothetical protein	lmo0282	-	987439	1.2	779	54.8817	58.7735	97.254	70.5785	88.3546	64.5261	85.5379	60.6254	90.7786	50.7816	71.5975	85.4893	75.7382	70.6068	70.7456	58.3263	60.0801	60.0176	67.2324	68.4625	13.0066	11.1929	15.2898	0	2.20098	11.9357	6.97445	3.56954	5.85185	0	22.6843	15.911	14.4631	3.06164	17.3606	7.03146	10.3843	10.047	14.7246	4.42222
	lmo0283	ABC transporter permease	lmo0283	-	987440	1.2	662	53.7865	30.9471	86.1489	48.3473	91.5078	68.5189	82.2757	63.2931	84.3865	56.466	66.3553	42.651	51.9498	50.2875	58.1619	42.8273	47.5662	43.9807	55.6994	54.4831	19.6738	1.88115	4.49699	6.84143	1.29469	4.68066	12.3079	3.14959	5.16339	3.32869	11.8611	12.8692	12.7615	4.80257	15.3182	10.3404	18.3253	2.364	9.44896	5.20261
	lmo0284	ABC transporter ATP-binding protein	lmo0284	-	987441	2.2	1016	76.4837	50.0575	116.712	82.9359	112.733	81.7533	109.869	79.6728	112.015	71.8146	71.777	53.5433	64.876	59.0353	66.3102	48.73	51.4405	48.1703	53.4173	58.4944	9.97556	11.0372	10.2608	5.57506	6.75226	21.3598	10.6983	2.05327	15.7085	5.0634	9.66557	5.33887	26.345	9.39264	26.6299	8.08929	13.274	6.67823	27.7197	10.8534
	lmo0285	lipoprotein	lmo0285	-	987445	3.5.2	821	99.5301	86.7889	156.794	115.179	129.093	98.5232	125.23	89.2098	129.253	82.8191	85.4965	86.5448	67.1832	57.5063	67.64	51.2369	53.4247	46.6194	57.6849	55.8652	14.1052	16.6901	27.2035	8.27714	6.26556	21.3932	6.61809	11.855	11.1057	5.36964	15.546	12.2671	41.1722	6.77881	30.2016	9.17426	22.9921	5.72018	16.5127	5.87477
	lmo0286	aminotransferase	lmo0286	+	987447	1.3	1181	35.3158	25.2027	22.3364	17.4206	42.6432	21.4562	29.4017	27.7415	33.0508	26.3466	25.3636	17.5655	11.3115	8.45663	13.2518	8.75165	12.0312	7.00795	11.3706	9.85976	7.35688	7.38615	6.30606	11.5124	6.5359	10.5018	9.20486	3.5333	6.75784	5.60132	9.14795	11.1559	25.0534	13.4691	37.2328	12.1801	36.5473	12.818	27.3836	13.4238
	lmo0287	two-component response regulator	lmo0287	+	987448	5.2	713	2464.86	2135.28	1453.25	1668.51	1756.29	1925.58	1494.09	1923.02	1843.97	1739.41	2025.21	1927.33	1042.84	1339.18	1107.03	1241.54	1020.32	1150.65	1155.19	1478.28	18.2686	8.73392	8.35156	4.76457	8.4155	23.1804	0	7.79899	17.5801	5.15154	13.7673	11.95	17.775	16.7232	12.6436	7.68142	18.9071	7.31713	21.9351	7.72959
	lmo0288	two-component sensor histidine kinase	lmo0288	+	987449	5.2	1832	183.803	183.875	98.9987	103.38	97.6282	81.7318	92.7578	85.0157	103.785	84.6435	142.408	163.964	58.036	57.0652	58.8391	55.5132	52.1771	52.1059	55.5402	57.0323	30.8363	12.9279	24.3986	17.3219	13.5805	18.0587	21.5169	14.43	26.1465	8.02662	27.8862	26.6594	39.2349	16.5024	44.9406	19.0747	39.0334	18.5264	31.329	21.0761
	lmo0289	hypothetical protein	lmo0289	+	987451	5.2	1322	116.84	133.932	98.8799	70.9204	80.1201	63.4372	80.6334	61.6435	80.0431	58.1099	117.202	131.083	57.5599	43.9185	60.9599	42.6451	47.0057	43.8591	51.7432	42.1164	17.5275	14.1406	31.5503	17.1424	7.13696	27.3658	20.5596	7.36571	13.8003	10.5647	17.089	18.7613	25.5809	12.6353	37.5294	10.3638	27.5503	12.2417	31.568	10.9503
	lmo0290	hypothetical protein	lmo0290	+	987453	4.1	839	221.226	208.899	140.508	130.737	132.986	122.558	133.457	131.481	141.598	121.964	227.753	214.796	105.536	103.105	102.275	95.1886	92.4548	95.9722	100.86	101.467	18.979	14.8477	26.6206	17.5495	7.15318	23.3977	17.8098	9.11507	24.4524	8.75762	8.19157	21.2383	18.4662	12.3194	34.9279	12.2423	22.4994	14.305	29.8317	8.21269
	lmo0291	hypothetical protein	lmo0291	+	987454	5.2	830	87.4724	76.5512	113.659	112.058	148.167	121.132	143.813	137.536	123.572	116.179	84.4028	89.6695	275.179	194.94	273.385	257.157	289.767	223.222	295.201	172.758	3.4881	4.50254	14.3514	0	4.1318	9.95837	6.54641	2.51285	13.7318	2.65574	4.73159	0.933407	18.6662	3.83165	16.2952	3.29996	12.9961	6.28692	8.79515	12.4525
	lmo0292	heat-shock protein htrA serine protease	htrA	+	987455	3.5.2	1502	323.566	523.49	289.368	417.733	428.444	413.624	364.347	524.758	327.686	428.85	292.334	388.444	815.112	693.328	809.385	840.372	913.857	872.947	848.167	623.096	9.64275	0.82981	10.9104	4.52682	3.42667	4.12944	8.14382	2.77868	9.11066	1.46834	9.15625	4.1286	5.62934	3.17775	9.7603	4.10519	8.9818	3.1284	14.5884	5.04892
	lmo0293	rRNA large subunit methyltransferase	lmo0293	+	987456	1.4	479	2.3761	0.89426	0.619756	0.737083	1.44177	1.0894	0.458239	0.439315	0.145335	0.348186	3.48602	2.25563	1.21107	0.537405	0.996417	0.329861	1.53506	0.784412	0.392525	0.120794	126.814	75.3519	24.8459	54.3359	35.7659	73.2718	36.8338	46.404	45.1689	26.0539	67.5805	48.4788	20.5647	9.95032	11.7546	9.99785	0	13.0611	21.7523	17.2467
	lmo0294	LysR family transcriptional regulator	lmo0294	-	987457	6	863	15.9286	23.5488	7.74695	7.78032	8.07658	6.12788	4.49753	3.72197	8.8816	5.02935	13.3147	20.2712	1.42973	1.79135	1.79909	1.40497	1.3645	1.35577	1.74455	1.47637	52.0006	36.0881	91.4467	53.811	28.8114	40.7066	59.8156	17.7237	36.9804	23.8402	58.0236	45.7855	48.9635	8.29194	36.5698	11.9022	26.5618	13.303	12.0846	5.58919
	lmo0295	FMN-containing NADPH-linked nitro/flavin reductase	lmo0295	+	987458	3.5.2	737	5.46051	5.46735	6.85259	5.17756	3.51651	2.83421	6.25887	2.28587	3.87561	1.96267	8.40801	14.8433	6.69532	1.66028	5.1036	2.64604	4.49287	2.83437	6.21231	1.88557	0	1.68998	6.05997	0	0	1.40166	3.68568	0	1.54622	0.996802	6.65981	5.25516	0	5.39313	6.11621	0	10.9753	3.53959	2.82957	5.60867
	lmo0296	lmo0296	lmo0296	+	987461	1.2	638	4.04568	2.55263	1.86218	0.885883	4.33208	1.63666	2.29478	0.577503	3.38433	1.22056	10.038	3.88708	3.63888	2.52303	6.3621	2.47783	5.53488	1.89863	5.30738	1.72401	0	1.95181	0	8.87299	0	9.71292	4.25671	1.0893	3.57155	2.30247	1.53832	1.21387	6.62042	3.73721	8.82974	3.21862	2.11262	1.63519	9.80385	1.0796
	lmo0297	transcriptional antiterminator BglG	lmo0297	-	987506	1.2	1871	3.00566	2.84329	3.57552	4.1957	2.86506	3.38692	3.13326	3.09773	3.57748	2.58907	2.64431	2.31346	1.97963	1.27461	2.07587	1.6634	1.37762	1.49731	2.01295	1.36281	6.19361	6.66242	11.1488	7.26902	4.58537	12.1567	15.2566	4.46192	14.02	2.75079	14.7028	14.9166	35.4044	6.80364	28.3316	9.15554	24.5186	13.396	23.4256	10.3185
	lmo0298	PTS beta-glucoside transporter subunit IIC	lmo0298	-	987507	2.1.1	1313	4.28204	2.94003	4.6977	3.23105	4.21339	2.78568	3.73845	3.81141	3.13234	2.62862	1.96321	1.59948	2.26729	1.81589	2.36592	1.4058	2.52339	1.94213	1.91184	1.58853	35.2951	21.8308	34.0355	5.17793	20.9043	35.4255	22.7705	20.6593	27.7896	25.1932	24.6869	25.9734	28.9757	18.7799	38.6452	14.087	31.8485	20.6751	32.5788	23.6256
	lmo0299	PTS beta-glucoside transporter subunit IIB	lmo0299	-	987508	1.2	290	10.7128	5.01523	6.13367	4.62006	4.55817	5.84009	5.54296	4.34786	9.3494	4.59462	4.79178	2.62632	4.99409	3.98899	4.93072	2.35777	5.82375	3.45034	4.96389	1.59399	84.6673	25.7156	15.3686	31.1744	17.6986	28.4378	37.3888	4.78392	27.4494	12.6399	23.6458	15.993	53.3046	19.1484	34.9002	9.4236	13.9172	19.7487	28.7041	30.8188
	lmo0300	phospho-beta-galactosidase	lmo0300	-	987510	6	1391	5.18918	3.51537	3.73991	2.33833	2.85868	2.44176	3.31828	2.27232	3.30763	1.96105	2.05355	1.55561	2.40125	1.76046	2.31925	1.13745	2.17026	1.56281	1.89495	2.29093	24.988	18.8156	35.3411	17.1073	17.2663	39.3855	18.5635	19.5017	37.7091	19.0252	30.3653	13.3735	39.5085	17.1557	31.6158	21.1777	34.9129	14.6374	36.0038	20.3193
	lmo0301	PTS beta-glucoside transporter subunit IIA	lmo0301	-	987511	6	341	4.66882	3.76531	1.52221	1.8621	1.68628	1.52898	1.92943	2.77462	2.44775	1.46605	2.44633	2.4209	2.33714	1.50851	1.22367	0.617284	3.23172	0.978604	0.918186	1.18675	25.4264	7.29359	61.025	19.8942	20.0791	45.3695	43.7433	14.2468	66.7316	34.4159	11.4969	22.6801	61.8487	27.9307	69.2902	12.0275	31.5781	22.9142	61.0591	26.223
	lmo0302	lmo0302	lmo0302	+	987513	5.2	284	0	0.301224	0	0	0	0	0	0	0	0	75.5916	47.5986	24.7312	13.8028	16.9915	13.7037	22.7513	10.7157	16.7477	12.2066	0	0	0	0	0	0	0	0	0	0	6.89816	21.7729	34.6352	2.79307	27.7161	7.2165	9.47344	5.4994	3.66355	7.26175
	lmo0303	putaive secreted, lysin rich protein	lmo0303	+	987514	2.2	554	0	0	0	0	0	0	0	0	0	0	82.2826	79.1801	49.2282	9.99283	34.9015	15.6907	26.0214	13.3421	22.2926	9.50684	0	0	0	0	0	0	0	0	0	0	3.5423	1.39759	5.08162	2.86856	0	0	9.72948	0	5.64384	1.243
	lmo0304	lmo0304	lmo0304	+	987515	6	1265	0	0	0	0	0	0	0	0	0	0	15.3098	16.2491	16.1858	3.92229	13.0337	4.75251	11.2329	4.39502	8.83025	2.70213	0	0	0	0	0	0	0	0	0	0	0.776452	1.22537	10.0248	0	2.67403	0.541522	0	1.23802	4.94839	1.08984
	lmo0305	L-allo-threonine aldolase	lmo0305	+	987517	6	1076	7.27169	5.50007	7.04347	7.0957	8.08569	4.91596	9.12223	5.38436	8.09667	4.96577	10.034	5.73609	9.44564	4.0717	7.71598	4.85144	8.96238	4.1175	8.10562	2.74563	2.69138	0	11.0734	4.21158	0.797011	7.68376	6.31392	2.58518	5.29763	2.73218	4.56355	2.88082	17.0213	5.91291	13.6209	2.54621	13.7879	3.88073	12.603	8.32708
	lmo0306	lmo0306	lmo0306	-	987520		383	0	0	0	0	0	0	0	0	0	0	0	0	0	0	0	0	0	0	0	0	0	0	0	0	0	0	0	0	0	0	0	0	0	0	0	0	0	0	0	0
	lmo0307	lmo0307	lmo0307	+	987521	5.2	1145	0	0	0	0	0	0	0	0	0	0	0	0	0	0	0	0	0	0	0	0	0	0	0	0	0	0	0	0	0	0	0	0	0	0	0	0	0	0	0	0
	lmo0308	pseudo	lmo0308	+	987522	6	356	0	0	0	0	0	0	0	0	0	0	0	0	0	0	0	0	0	0	0	0	0	0	0	0	0	0	0	0	0	0	0	0	0	0	0	0	0	0	0	0
	lmo0309	hypothetical protein	lmo0309	+	987523	6	1661	0	0	0	0	0	0	0	0	0	0	0	0	0	0	0	0	0	0	0	0	0	0	0	0	0	0	0	0	0	0	0	0	0	0	0	0	0	0	0	0
	lmo0310	lmo0310	lmo0310	+	987524	5.2	1076	0	0	0	0	0	0	0	0	0	0	0	0	0	0	0	0	0	0	0	0	0	0	0	0	0	0	0	0	0	0	0	0	0	0	0	0	0	0	0	0
	lmo0311	lmo0311	lmo0311	+	987525	5.2	620	0	0	0	0	0	0	0	0	0	0	0	0	0	0	0	0	0	0	0	0	0	0	0	0	0	0	0	0	0	0	0	0	0	0	0	0	0	0	0	0
	lmo0312	hypothetical protein	lmo0312	+	987527	5.2	1202	0	0	0	0	0	0	0	0	0	0	0	0	0	0	0	0	0	0	0	0	0	0	0	0	0	0	0	0	0	0	0	0	0	0	0	0	0	0	0	0
	lmo0313	hypothetical protein	lmo0313	+	987528	2.5	746	0	0	0	0	0	0	0	0	0	0	0	0	0	0	0	0	0	0	0	0	0	0	0	0	0	0	0	0	0	0	0	0	0	0	0	0	0	0	0	0
	lmo0314	hypothetical protein	lmo0314	+	987529	2.5	785	14.6072	5.7888	10.2189	8.82248	14.0875	9.14764	16.5106	9.9265	10.6505	9.35583	39.384	18.5555	35.6848	24.1217	35.2169	22.6958	35.2479	21.7693	35.7967	23.5318	3.6878	0	9.48316	0	4.36835	9.21244	10.3818	3.54229	10.1626	4.67964	8.75435	3.94738	12.5586	14.1786	17.2281	6.97778	6.87005	11.2997	26.5677	11.41
	lmo0315	thiamin biosynthesis protein	lmo0315	+	987530	2.5	674	0	0	0.220358	0	0.170876	0.290507	0	0.156201	0	0.0825329	0.413158	0.0943531	0	0	0.265711	0	0.654961	0.185935	0.279129	0.171796	10.7356	0	2.20852	1.67995	0	4.59745	2.01484	3.0936	0	0	4.36884	1.14913	4.17822	2.3586	15.0459	4.06262	1.99995	3.09596	7.73415	3.06607
	lmo0316	hydroxyethylthiazole kinase	lmo0316	+	987532	2.5	809	0.187741	0.105986	0	0.262074	0.49839	0.403482	0.181033	0.325418	0.516747	0.687774	0.258224	0.157255	0.179417	0.0796156	0	0.0651578	0.181934	0.103297	0.155071	0.357909	0	0	3.68087	0	0	2.55414	8.39517	0.859333	2.81756	0.908198	2.42713	1.91521	3.48185	2.94824	11.1451	4.2319	8.33312	2.57997	5.1561	2.55506
	lmo0317	phosphomethylpyrimidine kinase	lmo0317	+	987534	2.1.1	803	1.60771	0.854219	1.66502	1.49617	2.22363	1.54467	1.73264	1.77037	1.12797	2.63305	3.20852	1.98036	2.71134	1.44377	2.60258	1.0503	1.74127	1.35288	1.87474	1.44232	9.01309	4.65375	18.5417	1.41041	6.40583	7.7196	18.6072	11.2547	14.1929	8.23478	9.78098	7.71802	15.7853	5.94049	19.6495	5.11617	16.7906	11.0467	9.09051	6.86434
	lmo0318	thiamine-phosphate pyrophosphorylase	thiE	+	987536	1.8	644	2.71133	2.52888	3.11319	4.1688	4.38119	2.43215	4.20585	4.08665	3.89363	3.36849	7.24227	5.03582	6.87209	4.39922	4.54181	3.68217	5.82611	3.76194	5.16063	4.0452	6.74096	1.93365	9.24498	12.3066	13.3082	11.2263	21.0855	16.1874	26.5374	5.70264	9.14408	3.60773	10.9314	6.17074	20.9942	3.18868	16.7438	4.04995	19.4253	7.48692
	lmo0319	phospho-beta-glucosidase	lmo0319	-	987537	5.2	1415	19.1699	20.5528	26.7861	22.6372	32.5824	25.8964	26.873	35.7781	23.4507	35.5661	61.2023	53.8382	46.0308	58.5225	49.9897	58.1823	48.3936	60.9803	50.4294	59.2916	72.67	57.2516	113.702	100.103	76.3814	78.1664	88.3627	61.9375	92.6749	57.6667	63.1723	50.9438	91.6199	48.9084	102.803	42.1217	77.2226	46.8576	68.575	38.9755
	lmo0320	peptidoglycan-bound surface protein	lmo0320	-	987538	5.2	1199	1.26725	2.00314	1.73532	0.884499	2.1146	1.19834	1.71076	1.18615	1.80216	1.11419	0	0	0	0	0	0	0	0	0	0	30.1939	20.7867	47.2072	28.3492	15.737	52.5833	38.5338	29.5825	44.6935	22.0692	0	0	0	0	0	0	0	0	0	0
	lmo0321	hypothetical protein	lmo0321	+	987539	5.2	659	6.10585	2.08119	3.49317	1.28654	3.4952	1.48555	3.11047	2.23651	2.95955	1.9414	10.9862	6.07934	130.575	45.9237	158.883	63.5733	154.176	55.5269	168.334	35.9308	0	1.8897	4.51743	0	2.60116	1.56731	6.1819	5.27318	5.18686	4.45842	2.97875	0	6.40977	1.2061	8.54879	2.07748	2.0454	3.16632	9.49191	1.04525
	lmo0322	hypothetical protein	lmo0322	+	987554	6	392	0.58042	0.655336	0.567716	0.360101	1.02722	0.166321	0.746242	0.804852	0.887543	0.56702	1.24184	2.91702	18.4896	3.77414	13.5391	4.16314	8.06202	4.89676	12.9443	3.09824	11.0634	3.17355	7.58653	2.88541	2.18418	0	0	0	0	0	7.50373	0	3.58817	0	5.7427	0	0	0	2.65677	0
	lmo0323	hypothetical protein	lmo0323	-	987557	3.5.2	770	5.02956	11.2461	4.82301	6.14905	5.3108	6.52793	4.94494	5.88032	5.60983	7.73144	10.4897	8.09527	6.03177	6.02228	8.14193	4.5864	6.11637	5.48037	5.13184	5.7154	7.5191	6.47058	15.4683	4.41233	12.2467	10.7333	14.1117	4.51401	10.3603	11.4497	2.54991	2.01209	5.48696	3.09738	11.7089	3.55677	12.2565	4.74332	9.4796	2.6843
	lmo0324	lmo0324	lmo0324	+	987558	3.5.2	479	0.792032	0.715408	0.464817	1.03192	0.96118	0.953226	0.763732	0.109829	1.88936	0.348186	1.01676	0.530736	1.05968	0.940459	0.747312	0.87963	0.307013	0.261471	0.261683	0.241589	9.05816	7.79503	3.10574	4.72487	3.57659	10.7753	14.1669	8.70075	2.37731	9.1955	8.19157	3.23192	5.87562	3.31677	7.05275	8.56959	0	6.53054	4.35046	7.18611
	lmo0325	transcriptional regulator	lmo0325	+	987559	1.8	902	20.7981	23.5776	22.1547	19.5119	15.8387	17.662	21.4352	14.1865	21.3995	14.5598	31.1927	32.5142	168.825	110.338	171.344	98.1328	134.311	123.19	154.819	82.3167	3.20998	2.76236	11.5562	1.25578	0.950588	3.43663	7.53055	1.54166	3.79106	0	4.35432	1.71796	20.3012	4.40767	16.2455	3.03684	11.9598	4.62851	11.5627	3.81986
	lmo0326	transcriptional regulator	lmo0326	+	987560	5.1	872	0	0.0983379	0.17038	0	0.0660605	0	0.335937	0.0603869	0.0799094	0	0	0	0.332939	0.29548	0.547858	0.120911	0.506413	0	0.143881	0	3.32029	7.14321	1.70762	2.59786	3.93302	8.29436	7.78933	0	6.53557	3.37063	3.37797	5.331	6.46117	6.3828	7.75561	0	4.63906	4.78757	9.56802	5.53157
	lmo0327	cell surface protein	lmo0327	+	987561	4.4	4046	3.70124	2.82133	1.76417	1.2414	1.56753	1.06598	1.55804	1.4329	1.75824	1.39033	4.56533	3.17891	2.6753	1.45008	2.57044	1.7084	2.74923	1.75735	2.46746	1.77654	16.1153	8.62904	15.8395	13.4496	9.96885	12.2689	11.762	9.11568	15.2261	5.99855	11.6589	11.8831	13.5893	7.27773	20.076	5.08204	18.0129	10.0693	14.4478	8.01179
	lmo0328	lmo0328	lmo0328	+	987562	4.4	680	2.00974	1.51276	1.20129	0.935153	0.762169	0.191965	1.18429	0.154825	1.43414	0.327223	1.74045	1.68339	1.60053	0.378788	0.8779	0.697504	1.08198	0.55289	1.01445	1.27712	2.1282	0	8.75626	1.66515	2.52094	4.55694	5.99127	2.04423	8.37819	8.64188	1.44345	2.27801	4.14141	1.16891	1.65703	1.00671	5.94698	1.53434	12.2656	2.02604
	lmo0329	transposase	lmo0329	+	987563	1.8	305	3.23025	3.64718	2.18737	6.24352	2.45007	6.19463	4.31284	3.44561	4.10358	4.73351	0	5.61956	0	6.53316	4.8844	0	4.5751	7.51942	0	5.30547	14.2089	8.15166	19.487	0	8.4155	6.76095	4.4445	4.54941	11.1874	2.40405	12.8495	15.209	41.475	2.60139	29.5017	4.48083	22.0583	5.12199	10.2364	4.50893
	lmo0330	transposase	lmo0330	+	987564	6	815	0	0.315621	0	0.693725	0.918775	0	0	0	0.427456	0	0	5.46346	1.87003	2.13381	0	1.09954	0.902979	1.99948	0.692691	0	163.402	105.462	63.9416	44.4693	36.8178	65.9193	51.6673	23.0314	0	55.8942	139.739	0	51.8437	42.923	73.2933	32.7661	69.4835	32.0125	65.2569	56.6434
	lmo0331	internalin	lmo0331	-	987566	1.8	1901	34.9793	38.1852	29.0523	24.8143	31.2004	25.3621	26.4439	24.1692	28.6086	23.93	46.0037	50.1939	18.5289	21.6657	20.9656	14.901	16.077	17.8603	17.4345	22.0402	17.5258	8.52453	26.6486	10.7316	5.86696	13.5966	12.1558	6.95328	10.1992	4.64126	10.3364	13.05	18.5351	5.85929	24.9183	3.9649	14.905	4.3949	17.5665	3.98976
	lmo0332	lmo0332	lmo0332	+	987567	6	335	14.9355	17.8852	33.4226	12.4251	17.8505	8.36504	18.5478	7.06042	15.5716	6.79791	15.9776	34.1187	15.1383	5.37405	12.6331	6.126	8.11391	6.10099	8.78508	6.21228	30.1939	14.8477	124.229	20.2494	17.8829	76.9662	64.7627	22.7877	30.5654	8.75762	29.2556	48.4788	41.9687	4.73825	50.3768	12.2423	36.1598	10.8842	21.7523	14.3722
	lmo0333	internalin I	lmo0333	+	987568	5.1	5336	10.4571	10.52	7.59454	6.23143	7.17508	5.80524	6.62158	5.19572	7.84271	4.90605	10.1504	10.919	5.81366	4.54332	6.49715	3.73806	5.28773	3.76259	5.61317	3.97623	57.5703	38.7926	89.6631	33.7832	23.9645	57.565	47.9077	17.9982	60.0809	21.227	39.4153	50.2864	57.336	16.8542	54.7623	16.1854	39.2064	19.9697	36.9752	22.1036
	lmo0334	lmo0334	lmo0334	+	987569	5.1	524	10.5725	18.3144	18.1323	21.5649	11.644	13.5708	13.5464	16.6689	11.0289	11.5664	18.0609	33.8458	19.9307	7.37013	17.9924	12.164	13.0524	13.706	13.5178	12.9215	2.76058	0	8.51859	2.15994	0	0	0	0	4.34708	0	0	2.9549	5.372	1.51624	0	0	2.57136	0	3.97756	0
	lmo0335	lmo0335	lmo0335	+	987570	5.1	284	12.0055	6.32571	13.8303	20.1107	9.51062	24.3108	16.4644	17.5726	12.2388	12.5103	0	0	0	0	0	0	0	0	0	0	116.962	35.0092	47.0764	31.8307	36.1424	105.257	62.0359	43.9617	72.0701	41.2991	0	0	0	0	0	0	0	0	0	0
	lmo0336	lmo0336	lmo0336	+	987572	6	368	7.62411	6.51428	9.0696	10.1633	10.6277	9.74261	11.1269	12.7151	9.8308	6.49192	0	0	0	0	0	0	0	0	0	0	172.817	87.8789	133.319	61.4617	46.5247	120.543	44.2282	60.3629	61.8488	61.8017	0	0	0	0	3.05811	0	0	0	0	0
	lmo0337	lmo0337	lmo0337	+	987574	2.6	1475	12.518	13.0286	11.8913	13.9506	8.9085	12.8425	13.6106	13.0009	10.2089	11.1721	0	0	0	0	0	0	0	0	0	0	196.383	149.563	117.159	65.303	55.2481	93.9113	80.1636	46.6869	93.5463	54.8241	0	0	0	0	0	0	0	0	0	0
	lmo0338	lmo0338	lmo0338	+	987576	6	380	4.19091	3.37988	5.07517	2.22866	1.21094	0.857796	3.07898	1.79877	1.6479	1.4622	0	0	0	0	0	0	0	0	0	0	0	6.547	0	2.97629	0	5.43006	0	0	2.99504	0	0	0	0	0	0	0	0	0	0	0
	lmo0339	hypothetical protein	lmo0339	+	987577	5.2	371	32.2945	30.6933	18.5927	19.7823	15.968	16.8681	21.2859	14.0297	17.4402	11.6811	0.18742	0.171205	0	0	0	0	0	0.112461	0.168828	0.155864	31.1679	26.8216	44.0814	33.5313	25.3822	27.8071	40.2156	18.7113	30.675	13.8427	0	0	0	0	3.03344	0	0	0	0	0
	lmo0340	lmo0340	lmo0340	+	987578	2.1.2	218	32.6361	25.4803	10.1878	12.6011	19.2236	16.1172	16.7393	15.4061	12.7417	10.1753	13.371	17.158	15.9263	14.429	11.7386	16.1466	15.1404	13.7541	13.4785	11.914	13.2357	11.39	20.4213	5.17793	11.7586	23.617	24.8405	19.0701	0	13.4363	13.4656	7.08366	38.6342	3.63482	20.6108	12.5218	30.8211	23.8559	19.0705	6.30015
	lmo0341	lmo0341	lmo0341	-	987581	2.1.2	332	212.35	491.118	296.59	471.308	281.946	234.761	324.758	207.072	280.929	227.69	390.895	638.031	341.28	142.146	348.836	217.134	323.94	292.722	311.191	192.574	8.70454	0	13.4302	0	2.57772	3.10638	0	0	6.85351	2.20913	2.95192	4.65862	4.23468	7.1714	3.38871	4.11752	12.1618	7.84449	12.5419	4.14334
	lmo0342	transketolase	lmo0342	-	987582	2.1.1	1997	4.90917	3.60927	5.28561	3.25821	4.67601	2.97704	4.99063	3.53563	4.81832	2.73251	5.05979	2.90072	5.23704	4.45417	5.59549	3.80381	6.30621	4.37617	5.72088	3.85961	25.3882	11.2361	17.9069	7.94572	6.4443	18.1206	24.5048	8.36108	22.2739	8.10014	28.5352	18.6345	35.9948	17.1317	42.3589	16.127	27.0263	19.8727	34.4901	21.062
	lmo0343	translaldolase	lmo0343	-	987583	2.1.1	656	3.47192	1.82935	4.07511	1.61552	3.3356	1.69131	3.34786	0.722161	2.86689	1.61109	2.54686	2.32651	3.76039	3.53362	4.91384	2.49028	4.71034	2.86543	3.44131	2.82405	41.9129	11.39	27.2284	24.1637	15.6782	28.3404	24.8405	13.7729	27.7896	16.7954	34.4121	21.251	40.7806	8.48125	41.2216	6.26089	30.8211	19.8799	30.195	16.8004
	lmo0344	short chain dehydrogenase	lmo0344	-	987585	2.1.2	764	1.2921	0.785546	1.94433	0.83247	2.03544	0.512659	1.43761	0.895858	1.64143	0.509762	1.73162	0.999033	1.89971	1.34878	2.65711	1.17284	3.08217	1.58591	2.545	1.36426	22.7342	11.4123	21.4357	7.41155	5.61033	20.2829	16.0002	14.5581	22.3747	10.5778	19.2743	18.2508	29.4933	12.4867	32.4519	8.96166	24.7052	17.0733	17.7431	7.21429
	lmo0345	sugar-phosphate isomerase	lmo0345	-	987586	2.1.1	446	1.02061	0.192056	0.66551	0.949798	1.54821	1.0236	1.80425	0.825558	1.24852	0.623151	1.24779	1.13984	1.46303	2.16405	2.00621	1.18071	1.64839	0.748731	2.24802	1.55654	25.9384	2.79017	36.6852	20.2947	3.84063	37.0264	18.2553	6.22872	28.081	19.7487	17.5926	10.4116	28.3923	5.34246	42.9161	16.8708	24.1604	17.5317	25.694	12.3466
	lmo0346	triosephosphate isomerase	lmo0346	-	987587	2.1.1	764	2.88238	1.45887	1.1666	1.01746	2.18621	0.512659	1.72513	1.03368	2.09739	0.509762	1.54934	1.49855	2.6596	2.02317	3.28231	2.06972	2.50426	2.02341	3.94064	1.89481	20.8397	0	35.0765	8.89386	13.4648	18.9307	10.6668	8.18894	40.2745	9.61621	21.8442	13.1812	27.65	11.4461	33.927	14.3387	44.1165	11.6099	34.1213	9.01786
	lmo0347	dihydroxyacetone kinase	lmo0347	-	987589	5.1	650	1.05118	0.395617	1.82785	0.434777	0.974468	0.702839	1.68936	0.971756	1.17876	0.513454	1.28517	1.07615	1.22781	1.48591	2.29589	0.648575	1.24503	1.15674	1.15768	1.42504	15.5839	11.495	38.929	13.9351	7.91135	50.8473	22.9803	10.6922	40.3157	13.5602	21.1395	10.7234	64.9838	36.6832	50.2685	24.2213	70.5051	35.3111	52.9273	38.1493
	lmo0348	dihydroxyacetone kinase	lmo0348	-	987591	5.1	995	0.916085	0.344775	0.672025	0.0710441	0.636926	0.525012	1.10419	0.317577	0.770452	0.335601	0.770004	0.191832	1.02138	0.647476	0.780326	0.847836	1.03571	0.672053	1.19807	0.582141	23.282	10.0177	20.9544	4.55409	12.9274	35.3117	17.7512	9.78397	35.5165	12.5561	15.791	11.6816	43.8902	15.9845	40.787	17.208	28.4631	22.5553	42.9804	20.0865
	lmo0349	lmo0349	lmo0349	-	987592	5.2	341	0	0.25102	0.217458	0	0.505884	0	0	0	0.203979	0	0.203861	0	0.212468	0.188563	0	0	0.430895	0.122326	0.183637	0	0	3.6468	8.71785	6.63139	7.52966	3.02464	0	2.03526	16.6829	0	0	2.26801	4.12324	0	6.59907	4.00916	3.94727	3.05522	6.10591	2.01715
	lmo0350	lmo0350	lmo0350	-	987593	3.5.2	431	0.704028	0	0.688618	0	0.667486	0.453917	0.678873	0.488128	0.161484	0.515831	0	0.147427	0.504611	0.298558	0.415174	0	0.852814	0.193682	0.290759	0.134216	0	0	0	0	0	4.78901	12.5928	1.61125	7.92437	3.40574	4.55087	5.38653	6.52847	3.6853	13.0607	4.76088	6.24984	3.62808	9.66769	4.79074
	lmo0351	phosphotransferase mannnose-specific family component IIA	lmo0351	-	987594	5.2	377	0.603453	0.454227	0.590244	1.12317	0.762841	1.21045	0.775854	1.11572	0.922763	0.14738	0.184445	0.168488	0.576698	0.682419	1.10713	0	0.194929	0.221351	0.166148	0.920337	0	3.29948	15.7752	0	4.5417	5.47315	0	1.84143	12.0752	1.94614	0	2.05201	14.9222	0	8.95588	1.81367	3.57134	4.14638	5.52439	3.65009
	lmo0352	DeoR family transcriptional regulator	lmo0352	+	987595	2.4	764	33.7934	34.2274	26.3457	27.934	26.9884	29.9906	30.4774	31.2172	29.7282	28.9836	33.8121	41.1268	29.2555	19.8945	29.3845	22.8359	27.8358	23.57	25.6142	23.4957	3.78903	0	1.9487	2.96462	2.24413	4.05657	3.5556	1.81976	2.98329	0.961621	3.85486	0	5.53	1.04056	5.90034	3.58466	10.588	2.0488	4.09455	1.80357
	lmo0353	hypothetical protein	lmo0353	+	987596	1.4	413	16.162	18.6628	13.6526	16.0663	15.4625	10.2625	14.6991	13.7525	13.9859	12.5145	13.4725	20.7679	16.4986	10.7481	16.4625	11.7284	14.7722	14.8546	14.7149	14.2852	21.0044	9.03771	18.0043	10.9562	12.4403	14.9917	16.4253	11.7691	16.5378	21.3229	21.3693	14.9886	10.2185	11.5366	21.8056	6.62384	16.3039	7.57164	15.132	0
	lmo0354	fatty-acid--CoA ligase	lmo0354	-	987600	2.1.1	1526	136.883	117.051	90.1021	125.718	74.8172	114.633	107.889	131.915	81.0451	126.268	160.215	117.492	56.0088	60.0542	54.382	62.8702	61.282	70.4653	56.5935	53.3488	16.135	10.618	16.5965	6.6835	11.8048	12.1936	24.9381	7.74919	20.1768	9.6351	7.08112	6.09557	12.0052	8.86211	14.7798	4.48963	16.7972	6.5006	14.3591	4.96957
	lmo0355	fumarate reductase subunit A	lmo0355	+	987602	1.2	1520	281.295	108.99	51.243	43.5446	46.713	61.9261	61.7493	70.2904	45.4982	53.0359	409.842	150.951	49.9714	29.6792	41.3503	29.1822	37.6409	46.5112	43.3971	25.8838	20.0101	16.3998	17.642	8.94649	10.1584	17.6825	13.4124	6.8645	23.2573	13.5424	16.8032	26.0084	21.3238	9.42042	22.9991	8.56395	19.5261	11.6785	13.7293	11.339
	lmo0356	oxidoreductase	lmo0356	+	987603	1.2	1016	248.591	401.895	455.731	587.231	449.004	647.149	530.386	613.952	487.435	615.108	289.233	561.359	670.766	732.583	673.566	736.969	711.98	818.031	742.285	720.917	9.97556	4.90543	19.0558	7.80509	0.844033	12.2056	6.68642	5.4754	8.97628	2.89337	4.83278	6.10156	13.8658	3.9136	11.0958	6.06697	17.2562	3.59597	15.3999	4.74834
	lmo0357	PTS sugar transporter subunit IIA	lmo0357	+	987604	2.1.2	446	0.850504	0.768223	1.4974	1.1081	0.51607	0.731142	0.820114	0.707621	0.624259	0.623151	0.155974	0.427438	2.27583	1.58697	2.00621	0.236142	1.31871	1.0295	1.54551	0.518848	0	0	0	0	0	0	0	0	2.55282	0	0	1.73526	3.1547	0	2.52448	4.60112	0	1.16878	7.00745	0
	lmo0358	PTS fructose transporter subunit IIBC	lmo0358	+	987605	3.5.2	1394	1.09011	0.861567	1.49275	0.405792	0.826821	0.140568	1.15627	0.604648	0.900141	0.479223	0.999575	1.4153	1.82311	0.924568	1.45713	0.605337	1.53176	0.539811	1.48568	0.706582	34.2846	22.3513	34.1965	17.8834	16.6138	38.5592	30.2226	18.9608	32.72	18.9843	42.9837	30.0256	25.2715	22.8251	28.3121	14.7434	21.2898	18.3511	26.9448	20.7702
	lmo0359	D-fructose-1,6-biphosphate aldolase	lmo0359	+	987607	5.2	860	51.3965	44.2705	21.6807	25.3947	25.9217	21.0289	25.0355	26.6956	27.7909	22.1933	46.1563	46.0095	21.6051	17.3018	24.2334	19.3703	21.4802	18.4639	24.4359	18.6537	222.193	153.547	180.068	90.8755	78.7597	162.192	135.844	69.5251	153.738	78.605	196.369	209.005	149.04	69.3402	136.304	44.5897	98.7779	57.0379	110.353	78.5214
	lmo0360	DeoR family transcriptional regulator	lmo0360	+	987608	5.2	770	33.4318	28.7277	19.9672	17.3458	18.4008	19.0751	19.7798	17.1623	19.9963	16.1132	29.0276	28.9943	17.7183	14.5538	21.0139	11.5687	15.7688	16.0613	17.5949	12.634	601.528	490.146	464.048	322.1	281.674	366.275	366.905	260.91	359.649	256.663	495.957	629.784	343.85	162.096	333.702	155.609	234.624	177.536	288.451	176.269
	lmo0360a	hypothetical protein	lmo0360a	-	16695810	2.2	227	5.66928	6.77755	5.54519	6.51736	4.8059	5.447	8.03928	4.16193	1.52984	3.66511	14.9838	15.9221	4.78052	3.39414	4.71987	3.93519	6.14026	3.85325	3.85638	3.56025	133.489	196.927	169.998	99.4708	79.0614	104.35	107.37	91.5868	45.0438	58.0768	163.831	98.6586	154.622	48.8788	123.733	45.1031	118.418	52.7026	119.065	39.3345
	lmo0361	membrane protein	lmo0361	-	987609	3.5.2	734	2.06898	1.63522	6.37464	5.10242	6.74787	4.26867	7.08244	4.59039	6.73881	4.39614	2.4663	1.90632	2.96587	4.29924	4.55505	5.52911	4.21046	3.81356	4.61417	5.04871	57.1835	18.6656	28.3953	6.17125	5.83933	18.296	18.5036	10.4172	24.8405	10.0087	20.061	16.8851	21.1043	9.74726	26.1	5.59647	16.5302	11.3729	17.0467	11.2631
	lmo0362	hypothetical protein	lmo0362	-	987610	5.2	179	3.80175	0.476939	4.54488	4.32422	6.40787	5.81014	6.9245	3.80739	4.65073	4.64248	1.16201	0	1.21107	5.37405	1.66069	4.39815	2.04675	3.48628	3.48911	5.79813	56.3619	13.8578	57.9737	18.8995	0	22.9872	7.55565	0	0	4.08689	21.8442	12.9277	7.83416	13.2671	18.8073	11.4261	29.9992	8.70739	11.6012	0
	lmo0363	peptidase E	lmo0363	-	987612	1.2	617	0	0	0	0	0	0	0	0	0	0	0	0	0	0	0	0	0	0	0	0	0	0	0	0	0	0	0	0	0	0	0	0	0	0	0	0	0	0	0	0
	lmo0364	transcriptional regulator	lmo0364	+	987613	5.2	944	0	0	0	0	0	0	0	0	0	0	0	0	0	0	0	0	0	0	0	0	0	0	0	0	0	0	0	0	0	0	0	0	0	0	0	0	0	0	0	0
	lmo0365	hypothetical protein	lmo0365	+	987614	6.1	1448	0.419793	0.355482	0.46193	0.146501	0.517405	0.135329	0.65779	0.218293	0.722163	0.230682	0.38493	0.351626	0.100295	0.222528	0.412595	0.291389	0.254255	0.173231	0.346744	0.280103	7.00148	4.30367	7.20171	4.69552	2.36958	15.7056	12.2017	3.36261	10.2377	3.04613	7.4623	5.88839	11.6783	3.84554	14.0179	5.67757	11.1798	7.57164	7.9263	9.52196
	lmo0366	hypothetical protein	lmo0366	+	987616	5.2	1160	3.14357	1.62677	2.69041	1.82842	2.53334	1.74529	2.02083	1.81629	1.92278	1.63146	3.30286	2.46854	3.50489	2.72174	2.83219	2.04565	3.23673	2.0179	2.86702	2.94651	12.4833	7.51975	23.1125	7.81373	4.43608	23.1654	7.02851	8.99302	19.6574	4.43538	9.31341	6.68097	17.0044	6.17074	9.71956	5.90497	20.9297	7.6499	13.4898	4.7536
	lmo0367	hypothetical protein	lmo0367	+	987617	5.2	1265	5.1651	4.06867	4.05338	3.91248	6.10418	3.71739	4.74889	5.16351	5.95117	4.09242	6.27814	3.62208	5.33787	5.45046	6.46962	6.29499	4.53972	4.62634	6.25063	6.73242	34.3437	22.6585	11.7753	12.5399	13.5605	27.7808	25.7823	18.6936	34.2513	9.87826	31.0581	16.5425	24.505	16.9769	24.9576	10.2889	15.9948	12.7928	14.0204	10.3534
	lmo0368	hypothetical protein	lmo0368	+	987618	3.5.2	509	94.6711	69.5208	35.4355	36.6287	34.2632	33.451	37.3779	32.6643	38.3001	23.9224	87.3555	77.9245	39.0391	21.2433	36.5744	22.5599	26.1503	23.0504	31.8946	20.1229	42.6266	51.3555	37.9996	40.0224	33.662	70.99	32.0004	31.3909	38.037	33.1759	44.3308	34.9808	63.595	15.6084	37.6147	22.8522	37.0579	23.5612	49.1346	14.8795
	lmo0369	hypothetical protein	lmo0369	+	987619	2.1.1	719	407.421	331.115	275.998	296.602	282.106	287.783	306.205	314.842	280.303	306.636	402.248	363.377	176.311	181.195	176.615	175.486	155.144	171.234	165.82	161.945	42.2714	32.9123	49.6918	31.4991	30.9971	35.9176	34.0004	22.2352	39.6219	39.8472	34.1315	33.3965	21.5439	16.5839	40.7492	17.1392	22.4994	19.5916	23.2025	23.9537
	lmo0370	hypothetical protein	lmo0370	+	987620	1.2	335	504.185	396.54	298.147	408.765	292.302	305.421	364.409	349.098	331.78	321.989	344.244	306.121	137.975	155.272	139.142	135.714	129.165	137.708	137.944	140.984	17.2536	14.8477	13.3103	26.9992	20.4376	27.7078	32.3814	35.2173	27.1693	21.894	5.85112	6.92554	12.5906	14.2147	10.0754	10.2019	0	7.77445	12.4299	8.21269
	lmo0371	GntR family transcriptional regulator	lmo0371	-	987623	1.2	713	65.4924	78.8752	42.81	58.2729	47.332	57.0333	53.2943	60.6181	62.6285	65.6969	66.1074	68.5943	36.2302	47.96	37.1772	42.4292	27.657	41.7181	38.7027	51.8096	38.567	29.6953	48.0215	36.5284	27.6509	36.2194	40.0005	24.3718	41.553	38.1214	15.1441	9.77724	21.725	10.0339	15.8045	4.80089	7.56283	12.4391	19.0104	6.7634
	lmo0372	beta-glucosidase	lmo0372	+	987624	6	1442	1.37	0.654427	1.49463	0.980734	1.59864	0.996541	1.47348	1.3152	1.69205	0.810744	1.20791	1.32408	1.10784	0.67036	1.36722	0.658351	1.48081	0.898749	1.56683	0.723259	5.02185	12.9647	15.4964	3.14336	4.16401	16.4877	7.53995	3.37659	5.53553	3.56859	9.53696	6.98794	16.613	6.06811	13.2942	7.12648	8.41974	6.15491	13.7478	8.12732
	lmo0373	PTS beta-glucoside transporter subunit IIC	lmo0373	+	987627	3.5.2	1334	1.93647	0.771676	2.39546	1.06007	3.02394	1.07716	1.6476	1.14518	1.67217	1.00152	2.2979	2.05138	2.83036	0.869509	2.14957	1.30462	1.76619	1.28483	2.77561	1.25952	36.9112	23.3559	16.75	9.34355	3.85789	17.8216	17.3186	11.4707	21.3691	11.0208	25.7712	10.4583	15.8444	8.94411	19.4413	8.21653	13.1457	6.65284	15.6421	10.8518
	lmo0374	PTS beta-glucoside transporter subunit IIB	lmo0374	+	987628	6	302	4.26599	2.8333	2.94538	0.934124	4.56798	4.31446	5.32344	1.39189	3.68374	3.12563	5.52241	2.31212	3.35741	3.19251	3.35427	2.09021	3.64768	3.31369	4.14547	3.44443	28.6991	16.4647	14.7599	11.2274	5.66588	23.8976	13.4655	11.4861	18.8302	2.42785	19.4651	12.7997	27.9237	5.2543	11.1727	11.313	22.2767	3.44847	6.89182	2.27679
	lmo0375	lmo0375	lmo0375	+	987629	6	194	94.7514	342.515	484.363	636.476	498.335	376.43	499.316	360.103	562.022	399.967	153.742	523.224	601.061	253.986	537.145	438.191	558.48	497.089	560.727	337.778	7.43234	0	15.2898	11.6304	8.80391	10.6095	6.97445	0	5.85185	0	0	11.9332	7.23153	0	11.5738	0	0	2.6792	0	0
	lmo0376	transcriptional regulator	lmo0376	-	987632	6	920	42.1867	33.0905	27.3742	33.7281	24.7339	37.1887	27.0664	39.2664	29.2375	35.0832	37.5476	37.2725	16.4894	23.3867	16.8125	19.8275	19.2008	22.1214	18.3434	24.4894	1809.67	1943.26	1651	1872.71	1936.72	1261.3	1872.42	1955.92	1317.05	1613.46	1641.52	2287.4	2031.78	1324.12	1928.52	1562.44	2084.31	1534.43	1726.58	1436.66
	lmo0377	lmo0377	lmo0377	+	987633	6	419	7370.51	4765.03	5502.55	5649.67	7473.17	5304.76	6145.29	6025.64	7616.73	5499.61	7907.45	4699.44	5110.87	3184.97	5469.47	3930.44	4748.35	3396.73	5363.31	3415.79	27.6058	5.93907	21.2965	5.39985	6.13129	7.38876	19.4288	16.5729	59.7724	14.0122	9.36179	9.23406	20.145	1.8953	32.2412	17.9553	9.64261	1.24391	14.9159	9.85523
	lmo0378	lmo0378	lmo0378	+	987634	6	446	3.23192	6.14579	19.6325	8.54818	8.38613	6.14159	11.6456	6.13272	9.51994	3.61428	2.49558	4.8443	10.8915	1.15416	8.15858	2.95178	6.75841	2.33978	4.07453	1.94568	0	0	3.33502	2.53684	3.84063	2.31415	0	0	0	0	0	1.73526	3.1547	0	0	0	0	1.16878	0	1.54333
	lmo0379	lmo0379	lmo0379	+	987635	3.5.2	455	0.166744	0	0	0	0	0	0	0	0	0	3.66949	4.05035	4.30247	2.26276	5.50651	1.15741	4.03964	1.00919	4.68275	1.52582	0	0	0	0	0	0	0	0	0	0	0	5.10303	6.18487	0	2.47465	1.50344	2.96045	0	4.57943	1.51286
	lmo0380	lmo0380	lmo0380	+	987636	2.1.1	629	3.01726	4.49685	10.5063	5.95282	5.584	4.87637	7.33182	2.59405	8.4156	2.74127	1.88134	2.7295	5.42096	1.02363	2.46732	0.921518	3.04089	0.664053	1.89409	1.19644	0	0	0	0	0	0	0	0	1.81129	0	1.5603	6.15604	2.23833	3.7906	7.1647	0	0	0	8.28659	0
	lmo0381	lmo0381	lmo0381	+	987637	2.1.1	386	11.5919	7.32045	18.2564	10.7877	14.1569	5.74258	14.9668	6.2662	14.0603	5.03835	5.40468	6.74734	7.13496	3.66602	6.17933	2.72754	6.85424	4.64837	4.21939	3.59574	0	0	0	0	0	2.67293	3.51426	0	0	0	2.54002	6.01288	3.6438	8.22766	17.4952	3.54298	3.48828	6.74991	5.39592	0
	lmo0382	transcriptional regulator	lmo0382	-	987638	2.1.1	761	3.49242	2.47858	1.56159	1.02147	2.34619	1.20091	2.30924	1.38367	2.38029	0.657989	2.6534	2.00593	1.81183	0.677046	2.03991	0.969671	1.64385	0.713726	0.989038	0.380454	28.5296	14.7308	52.822	16.3696	16.8973	52.943	39.2656	19.1828	53.9107	15.4465	37.4103	20.3586	59.2189	20.8931	51.8313	17.9939	56.6914	13.7124	34.2556	17.2014
	lmo0383	methylmalonate-semialdehyde dehydrogenase	lmo0383	+	987639	2.1.1	1466	0.466473	0.2926	0.60835	0.819985	0.668305	1.02479	1.09952	0.754651	0.808408	0.607604	0.427732	0.260484	0.544856	0.571474	0.489039	0.827464	0.753406	0.370729	1.02747	0.31619	1.97588	2.55052	11.1781	4.6379	7.02152	18.3334	10.1978	5.69374	11.6678	3.51021	11.3911	9.51731	19.2249	14.1082	21.5381	7.47721	17.4842	11.3962	21.352	12.2267
	lmo0384	IolB protein	lmo0384	+	987640	5.2	821	0.4625	0.522196	0.452377	0.344331	0.210477	0.397592	0.267585	0.256534	0.339469	0.0677734	0.254454	0.232439	1.23759	0.313813	0.581849	0.38524	0.627472	0.458051	1.06965	0.282147	10.5789	1.51728	18.1357	9.65666	1.04426	17.618	4.96357	4.23394	13.8821	1.78988	8.37095	3.77451	17.1551	3.87361	12.3552	4.17012	11.4961	4.44903	12.7021	6.71403
	lmo0385	IolC protein	lmo0385	+	987641	6	977	0.932946	0.438901	0.836481	0.361758	0.530713	0.401006	0.29987	0.431229	0.713302	0.341777	0.712887	0.586089	1.04018	0.461575	0.978078	0.593616	0.376703	0.855528	1.09168	0.829998	5.92763	5.10104	18.2914	6.95686	3.51076	17.9808	5.56244	5.69374	17.5017	5.26532	8.0408	6.34487	14.4187	3.25573	16.1535	8.41187	15.1837	8.01293	22.4195	7.05385
	lmo0386	IolD protein	lmo0386	+	987642	4.1	1916	2.37981	0.940443	1.86218	1.10735	1.89528	1.05701	2.44777	1.10001	1.63758	1.04619	3.8188	2.09304	3.71469	3.26312	4.11665	2.28511	3.4593	2.6188	3.76758	2.29868	28.7291	12.3614	31.106	20.7036	13.4332	31.2972	22.7024	17.4287	35.1202	12.6636	15.3832	8.90169	20.5969	17.8556	23.546	12.1592	27.4641	11.1738	30.5009	8.99669
	lmo0387	hypothetical protein	lmo0387	+	987643	3.2	371	362.189	451.63	158.138	200.677	195.337	208.743	169.893	198.825	187.342	218.196	451.308	560.355	228.735	286.905	279.479	274.388	243.432	290.711	265.735	307.051	374.014	251.453	717.325	408.472	323.047	678.494	595.922	290.025	521.475	270.921	208.753	191.83	659.586	169.049	461.083	162.177	489.907	199.427	421.012	178.03
	lmo0388	lmo0388	lmo0388	+	987645	6	368	176.179	341.069	359.761	275.369	280.696	168.459	255.72	161.296	267.322	173.017	457.623	890.774	348.944	169.173	361.302	226.701	288.143	290.24	327.466	247.481	286.719	145.338	436.318	307.308	304.737	434.515	515.996	269.747	426.757	245.213	165.163	117.715	454.764	151.008	388.379	198.796	362.186	172.732	398.969	173.869
	lmo0389	low temperature requirement protein A	ltrA	-	987647	5.2	1115	5.85933	6.84638	18.726	13.1248	17.57	10.4254	16.7528	9.87277	13.4396	8.08689	6.37229	9.07387	23.3098	5.77855	17.9462	9.17464	16.8362	10.4213	17.7269	5.92282	110.386	79.3472	56.1036	49.7889	35.3813	63.0295	53.6208	23.701	65.44	34.9363	39.6366	38.227	32.8529	32.0978	48.5351	19.6578	26.6122	19.1937	33.681	22.8719
	lmo0390	uracil-DNA glycosylase	lmo0390	+	987648	6	665	55.3709	48.7251	25.6836	33.0425	31.5198	25.9101	33.5767	27.942	35.1947	26.3492	43.1303	47.8141	39.6051	27.306	37.8818	29.8757	39.1649	27.953	38.4745	25.5953	23.9375	14.9814	40.2906	15.3239	16.7552	32.617	32.6731	19.8576	20.5605	20.9867	26.5673	27.9517	55.0509	14.3428	27.1097	18.5288	28.3776	12.5512	26.6515	15.5375
	lmo0391	lmo0391	lmo0391	+	987649	1.1	299	78.3161	84.9905	61.7277	44.3429	105.153	59.917	69.8967	72.3991	63.2499	62.3949	82.0376	76.6383	69.273	51.8058	67.3578	57.7038	84.7356	52.5731	77.4582	43.8725	4.83102	4.15735	9.93835	3.77989	2.86127	6.89617	0	2.3202	3.8037	2.45213	26.213	5.17107	42.3045	2.65342	15.0459	13.7113	22.4994	5.22443	10.4411	2.29955
	lmo0392	hypothetical protein	lmo0392	+	987651	4.2	944	180.634	189.504	109.313	139.274	182.105	171.468	163.085	239.322	144.025	227.378	192.856	171.588	126.335	158.253	152.025	184.08	170.914	166.589	163.224	176.153	7.66828	2.63959	18.9302	3.5999	4.5417	13.1356	10.0742	3.68286	15.6978	7.0061	14.5628	4.10403	5.96889	5.05413	11.9412	2.1764	4.2856	2.76425	8.83903	5.11012
	lmo0393	lmo0393	lmo0393	+	987652	2.2	449	368.517	390.327	260.959	378.172	312.448	337.86	313.639	408.856	305.863	399.129	367.194	327.783	264.82	286.329	299.058	356.074	313.235	297.775	277.593	310.78	12.8827	11.0863	46.379	22.6794	5.72254	27.5847	6.04452	12.3744	27.8938	9.80853	17.4753	29.3027	6.26733	15.9205	17.5535	6.09393	14.9996	8.1269	20.8822	9.19822
	lmo0394	P60 protein	lmo0394	+	987653	5.2	683	410.523	632.948	87.3095	75.3117	115.004	73.2001	59.7051	35.9159	118.41	56.85	438.81	665.655	38.3504	32.6214	59.0858	31.3272	35.3334	31.3765	39.7575	60.8634	74.1604	83.8763	217.946	79.5767	28.8637	105.862	71.5799	54.9521	110.107	43.0199	45.9878	92.9886	204.101	46.5512	163.327	64.1466	108.55	73.3254	112.959	50.4288
	lmo0395	blasticidin S-acetyltransferase	lmo0395	+	987654	1.2	425	21.9538	22.5706	9.42728	5.4814	9.74718	7.36496	8.0891	6.93004	12.6094	6.80025	15.548	14.5018	5.11718	4.54145	5.8943	5.9468	2.42151	3.9282	4.71767	7.62195	517.123	330.831	489.919	460.508	437.251	478.361	520.382	416.656	508.946	326.376	385.35	329.565	523.013	321.4	566.869	292.895	424.637	316.409	436.271	296.351
	lmo0396	pyrroline-5-carboxylate reductase	proC	-	987655	1.2	800	95.9694	94.6375	72.6066	89.1345	68.5426	78.5838	75.0574	91.746	81.7796	87.4246	115.33	129.762	97.8831	105.629	102.03	113.594	99.348	104.406	108.986	90.9893	289.499	194.632	284.751	127.412	127.525	264.741	173.186	92.1128	219.389	109.29	152.173	96.8366	93.3058	49.6895	114.112	53.0651	82.5821	50.8746	79.514	52.5366
	lmo0397	hypothetical protein	lmo0397	+	987657	1.2	482	217.558	212.045	171.838	182.687	184.833	184.454	181.55	158.153	218.093	152.596	194.293	272.686	141.416	144.198	154.104	124.132	141.112	130.79	146.022	145.133	3.00063	2.5822	9.25934	4.69552	1.77719	4.28334	11.2631	7.20559	11.8127	3.04613	16.2814	8.02962	23.3565	13.1847	18.6905	12.7745	13.9748	8.6533	8.64688	4.28488
	lmo0398	PTS sugar transporter subunit IIA	lmo0398	+	987659	2.1.1	458	0.662615	0.187035	0.648111	0.154161	0.879511	0.427216	0.798674	0.229707	0.151985	0.121372	0.455689	0.971282	0.949855	0.140498	0.781503	0.344953	0.16053	0.364578	0.684139	0.126321	0	2.71722	16.2391	2.47052	0	9.0146	14.815	3.03294	14.9165	1.6027	2.14159	0	24.5778	6.93704	22.1263	5.97444	8.8233	4.55288	13.6485	4.50893
	lmo0399	PTS fructose transporter subunit IIB	lmo0399	+	987673	3.5.2	332	0.456667	0	0.223336	0	0.519557	0	0.220175	0.474935	0.209492	0	1.25622	0.382512	0.21821	0.387319	0.359069	0.158492	0.663812	0.628158	0.943002	0	0	0	26.8604	6.81062	5.15544	21.7447	16.3365	6.27081	30.8408	2.20913	2.95192	4.65862	8.46937	11.9523	40.6645	12.3526	8.1079	17.2579	18.8128	12.43
	lmo0400	PTS fructose transporter subunit IIC	lmo0400	+	987677	6	1112	0.409893	0.154266	0.3341	0.254303	0.82905	0.176183	0.724619	0.236827	0.501426	0.250268	0.187926	0.171667	1.63216	0.46353	0.859443	0.426775	1.39025	0.375879	0.95927	0.260473	7.81297	4.48232	20.091	3.05652	5.39862	20.4469	10.9974	5.00313	8.20205	3.96571	6.18232	11.8475	21.5387	7.86728	25.3468	11.0873	19.4065	9.38802	24.3907	9.91722
	lmo0401	alpha-mannosidase	lmo0401	+	987679	6	2627	16.347	21.8216	17.9135	20.0594	19.3992	19.9723	18.0227	22.2065	19.5373	21.6437	13.6629	21.1567	15.7881	15.0915	16.9482	17.0905	15.1404	16.3966	17.1827	15.0469	17.6476	10.9154	19.854	8.1984	8.49236	16.5319	16.0428	7.41616	19.9738	5.31855	10.0992	8.26427	18.7805	11.2074	21.899	12.5218	32.3622	9.54234	21.4543	9.18772
	lmo0402	transcriptional antiterminator BglG	lmo0402	+	987748	1.2	1934	22.1229	37.9333	32.1312	36.1296	34.8707	36.3809	32.207	36.5891	34.2135	37.0247	25.2939	34.6583	33.7596	35.5271	34.8205	35.458	30.9203	38.1166	36.6113	33.3205	8.98794	3.22275	6.16332	1.17206	1.33082	6.94963	7.02851	3.23749	8.25609	2.66123	8.12807	2.80601	9.47387	5.34798	11.0803	1.41719	9.76719	5.93992	9.71265	4.27824
	lmo0403	lmo0403	lmo0403	+	987752	5.2	416	101.927	148.846	164.436	77.2081	101.097	62.5426	106.373	58.786	87.3266	52.2362	165.022	265.139	122.152	33.0949	104.516	41.3869	75.4501	52.871	78.4673	34.9	10.4267	5.9818	35.7495	8.15804	6.1754	19.8451	16.3072	3.33842	24.6283	8.82062	11.7864	14.8808	33.8165	7.63574	35.1792	9.86427	35.6106	3.75858	27.5425	13.2348
	lmo0404	lmo0404	lmo0404	+	987761	5.2	398	92.6142	121.135	167.567	65.4396	90.3365	50.9479	90.2237	49.5468	81.4751	48.0304	167.399	307.428	167	42.1843	146.391	57.9366	87.5333	75.9117	116.793	49.6982	7.26469	6.25165	26.1536	0	0	7.77764	23.86	6.97804	2.85992	7.37484	0	5.83204	10.6026	1.99505	2.82817	12.0275	6.76674	7.85629	15.7009	1.72899
	lmo0405	phosphate transporter	lmo0405	+	987767	5.2	1007	12.8988	6.47274	14.2396	13.5483	14.0744	16.2762	16.7294	15.6375	12.8033	13.0984	9.13005	7.45558	105.896	60.3941	100.887	70.4228	102.703	66.3223	105.296	45.0965	30.1939	18.5596	28.0995	15.7496	13.6251	38.9962	18.8891	14.5012	26.0372	12.4066	34.1315	17.6986	27.9792	7.89708	44.7794	12.9224	42.856	13.994	18.6448	18.4786
	lmo0406	hypothetical protein	lmo0406	+	987775	1.8	380	43.5056	26.3631	29.475	21.5437	31.0302	24.1898	39.0646	28.3652	26.1832	21.6405	29.8279	15.2116	103.179	48.7473	104.977	61.3663	98.6309	56.2197	108.794	47.0242	22.8237	22.9145	11.7382	5.95259	4.50594	29.8653	14.2784	5.48079	23.9603	1.93081	18.0602	28.502	11.1035	8.35723	23.6943	8.99694	14.1729	1.37124	19.1831	5.43202
	lmo0407	lmo0407	lmo0407	+	987777	2.1.2	392	121.114	165.145	145.524	131.077	122.972	82.8277	112.869	81.0217	115.736	94.9759	147.069	239.844	196.914	84.3439	181.637	109.719	167.053	103.258	158.688	91.7668	33.1902	15.8677	30.3461	2.88541	0	15.7928	6.92121	0	8.71076	5.61557	25.0124	41.4475	25.1172	10.1276	17.2281	1.74445	17.1751	7.97623	18.5974	1.75538
	lmo0408	lmo0408	lmo0408	+	987782	2.1.2	422	308.634	277.436	189.707	212.614	212.278	189.911	168.649	211.494	221.817	227.317	334.427	332.293	310.754	267.254	286.487	308.058	267.384	259.715	294.867	244.81	47.9676	5.89695	24.6697	16.0846	8.11708	17.1182	22.5062	6.58213	24.2789	12.1737	27.8862	18.3371	23.3358	5.64557	26.6771	16.2073	9.57422	4.94036	22.2151	13.0471
	lmo0409	internalin F	lmo0409	+	987787	6	2465	3.82334	2.19322	3.67933	2.06598	3.71843	2.75663	3.09209	2.43707	4.32823	1.94284	4.46708	4.20973	5.15661	4.23648	5.52757	4.23764	5.13929	4.71623	4.81344	3.66791	58.7715	40.9666	87.0513	26.6708	28.195	52.0149	50.1872	27.3795	47.6619	25.9532	128.355	111.662	124.66	50.6797	107.536	45.0373	96.3479	48.7275	97.806	52.873
	lmo0410	pseudo	lmo0410	-	987792	6	1106	51.583	35.751	25.9323	23.3949	30.789	23.028	26.2277	23.4301	33.0214	22.294	57.1871	42.8616	24.5495	25.6323	28.4613	21.3114	27.0904	22.4104	29.3879	24.5124	14.4014	7.88657	4.03998	6.14617	1.55082	10.2788	12.2856	3.1439	12.3698	3.98721	6.21583	3.50344	6.36924	4.3145	18.3486	8.05092	13.4143	5.66334	22.6365	4.98548
	lmo0411	phosphoenolpyruvate synthase	lmo0411	-	987794	5.2	1592	59.1384	46.5622	28.8052	20.7438	29.5775	24.1268	26.2804	24.7208	27.7204	21.5775	60.5731	51.6143	27.5968	22.5083	33.5141	19.713	27.0125	23.8459	28.4254	21.8021	12.7371	12.5268	34.6252	9.96582	11.8546	25.3249	23.9049	11.3607	28.6531	12.4685	21.5974	19.9637	51.3425	29.9821	47.4611	24.5306	48.3038	25.909	45.2251	21.22
	lmo0412	lmo0412	lmo0412	-	987812	2.1.1	872	71.5932	38.5484	4.77063	8.02432	4.75635	9.1345	5.37499	7.8503	5.03429	7.91295	83.1374	46.0336	4.24497	5.02317	3.90349	4.17144	5.06413	5.1755	5.17971	3.91855	177.635	141.436	83.6734	44.1637	43.2632	81.7587	46.736	31.0955	78.4268	34.549	121.607	119.948	51.6893	20.972	52.9966	24.3443	55.6687	16.7565	43.0561	41.8819
	lmo0413	lmo0413	lmo0413	+	987816	3.5.2	191	113.261	112.677	67.0111	60.0722	69.3852	69.7897	82.483	63.4261	63.9475	57.1605	100.586	102.498	44.658	41.313	47.6412	40.1331	52.576	40.0922	47.7572	35.9363	7.54847	32.4793	23.293	0	0	5.38763	7.08343	3.62531	11.8866	3.83146	15.3592	16.1596	29.3781	12.4379	11.7546	7.14132	7.03107	8.16318	0	7.18611
	lmo0414	hypothetical protein	lmo0414	+	987822	5.1	809	70.4967	43.4544	34.6145	24.6349	46.7774	31.8751	40.0082	31.6307	39.1867	27.9236	73.7659	64.7105	27.3611	21.2574	32.771	19.2216	31.0197	20.2462	35.0462	19.1123	26.839	12.3181	14.7235	12.5996	7.41811	8.93948	10.0742	10.312	9.86144	17.2558	15.7764	20.1097	22.632	6.87924	19.5039	9.31017	19.9995	9.67488	19.3354	17.8854
	lmo0415	endo-1,4-beta-xylanase	lmo0415	+	987823	6	1400	1697.74	1727.09	1775.13	2456.75	1472.23	2487.8	1875.66	2555.21	1666.29	2397.07	2249.47	2216.27	1340.06	1638.41	1407.36	1525.81	1235.47	1675.53	1306.06	1646.86	19.6551	8.90224	23.4094	12.9504	7.3523	18.4587	16.5027	12.4208	26.8784	9.45148	21.049	9.96566	19.1241	17.6137	19.3309	11.7442	12.5264	10.4414	19.3768	6.89374
	lmo0416	transcriptional regulator	lmo0416	+	987824	5.2	203	49.1992	76.1699	53.9552	52.0294	45.232	46.4597	48.8788	48.3246	36.2483	40.963	46.822	56.5078	30.2766	23.3929	32.5301	19.4036	22.7551	23.7887	22.474	22.7377	0	0	0	0	0	0	0	3.41206	0	3.60608	0	0	0	0	0	3.36062	0	5.12199	0	0
	lmo0417	lmo0417	lmo0417	+	987835	5.2	410	7.40001	10.6528	17.1903	11.8794	4.20955	6.99761	7.84915	8.20909	6.11044	3.11758	8.65143	15.8059	7.95591	2.66741	6.69126	2.9535	3.94411	3.7662	6.57073	3.10362	0	0	3.62714	0	0	0	0	1.69358	0	0	2.3917	3.77451	0	0	5.4912	1.66805	0	2.5423	0	0
	lmo0418	lmo0418	lmo0418	-	987842	1.7	299	26.8657	37.7735	19.3364	49.5319	19.8003	29.8496	26.1502	31.2792	22.3235	31.7545	27.8882	37.7884	10.173	8.81344	10.1634	7.03704	5.89465	6.69365	9.21125	8.31065	671.512	536.298	611.209	529.185	403.439	513.765	444.272	343.39	323.314	331.038	373.536	294.751	211.522	130.018	225.688	127.973	242.994	146.284	219.263	140.273
	lmo0419	hypothetical protein	lmo0419	-	987843	5.2	554	46.854	64.9668	26.5323	18.3593	25.6661	15.4283	16.9094	13.2982	20.9911	15.7593	48.9927	69.426	18.5915	9.29566	16.3735	9.98499	11.5503	12.136	13.0134	9.40237	23.5023	4.49443	29.5465	34.7341	6.18653	27.9575	19.6039	7.52497	30.8408	10.6038	38.9653	32.1445	53.357	2.86856	44.731	16.0583	38.9179	16.9441	52.6758	18.645
	lmo0420	hypothetical protein	lmo0420	+	987845	3.5.1	812	8.51069	6.12453	4.29942	2.87217	5.32018	3.53754	3.96802	2.91796	4.63357	2.94652	8.48994	5.87531	5.36265	3.56948	5.00047	2.40194	4.98471	3.03602	6.72072	3.13798	28.5226	23.0112	12.8355	1.39479	5.2791	8.90649	13.3827	6.8493	14.0358	6.33392	13.3	7.63258	8.6725	1.95824	2.77599	3.37302	6.64189	4.49828	6.42134	3.39418
	lmo0421	rod shape-determining protein RodA	lmo0421	-	987848	1.2	1250	27.837	19.5579	18.4886	9.21972	17.4257	10.8679	16.9962	12.4736	17.2869	10.2869	43.6937	33.2951	19.2841	13.8153	20.0239	11.5597	19.4368	14.313	18.9265	14.3215	106.584	77.7633	58.3908	49.8547	32.2493	62.8428	80.4487	37.279	58.3781	33.5184	81.7193	71.9238	74.3964	33.0882	71.2604	34.525	58.2719	28.3982	49.2426	38.0502
	lmo0422	lineage-specific thermal regulator protein	lstR	-	987850	3.5.2	431	27.9851	28.6163	28.4055	12.2847	16.5537	11.1966	18.669	8.54223	19.0551	7.99538	29.8571	47.9137	21.3619	6.71756	19.098	6.7194	16.374	8.81253	15.9917	11.811	3.35487	5.77409	17.2541	18.3745	0	2.3945	0	1.61125	2.64146	1.70287	6.82631	7.18205	3.26423	1.84265	2.61213	3.17392	3.12492	7.25616	2.41692	3.19383
	lmo0423	RNA polymerase factor sigma C	sigC	-	987863	1.2	548	16.2042	22.8305	26.1449	6.31555	11.24	4.52429	16.0258	4.32113	15.1212	3.95752	31.7488	44.547	20.383	6.69554	20.6906	7.49849	14.8977	8.68712	19.2187	9.18829	7.9197	15.9024	29.8694	12.3931	9.38122	15.0736	7.43179	7.60721	4.15705	2.67993	16.1146	33.9087	43.6658	7.24978	34.9426	6.24378	22.1306	7.61302	5.70552	13.8225
	lmo0424	glucose uptake protein	lmo0424	-	987866	1.2	857	2.74719	2.60148	2.5137	2.39165	2.01646	1.98073	3.50355	2.51915	2.76442	2.53226	5.28185	5.12179	5.25077	3.68292	5.92276	3.32168	4.80915	4.58336	5.85585	3.71675	351.347	295.085	99.036	186.351	111.049	153.114	175.946	119.255	144.966	136.325	270.379	214.256	85.4636	66.7994	85.4879	58.3291	78.6693	42.6236	62.0625	61.9111
	lmo0425	transcriptional antiterminator BglG	lmo0425	+	987867	1.2	1961	3.83663	2.14404	2.50177	1.00983	2.3809	1.49918	2.69058	1.26286	2.45336	1.39132	3.23372	2.9864	1.74068	1.80778	1.95017	1.0222	1.65242	1.15143	1.8886	1.09343	14.7738	5.08544	35.7112	10.9813	8.75006	26.3615	31.8862	13.1265	28.4987	4.12438	18.5375	15.8137	41.6864	18.6632	55.2142	10.4827	37.8431	21.835	37.2516	15.8226
	lmo0426	PTS fructose transporter subunit IIA	lmo0426	+	987869	2.1.1	464	2.94329	3.50781	2.71893	1.36955	3.34863	1.96795	2.04976	1.81394	3.60056	1.31786	2.69885	2.87625	2.8128	0.970796	3.21425	1.36201	0.95075	1.16959	2.02593	1.87036	12.4671	10.7286	32.0592	7.31592	5.53794	20.0211	29.2477	1.4969	19.632	3.16404	31.7093	6.67235	42.4561	8.55942	55.8153	13.269	17.4189	20.2236	20.2086	19.2866
	lmo0427	PTS fructose transporter subunit IIB	lmo0427	+	984685	3.5.2	320	4.97426	2.94186	4.40201	1.32262	3.05422	1.83264	1.82725	1.31384	2.82521	1.90906	1.95478	1.38884	0.90547	1.80809	1.86246	0.986501	1.37725	1.82459	1.95651	1.62564	9.02994	3.88537	27.8645	0	8.02225	12.89	16.9473	2.16841	3.55486	13.7503	6.12454	16.9147	43.9299	4.95966	21.0924	8.54289	25.233	3.2551	22.7688	6.44735
	lmo0428	PTS fructose transporter subunit IIC	lmo0428	+	984384	2.1.1	1106	5.2888	1.86122	2.82165	1.34233	4.16772	2.47994	3.90766	2.28587	3.90711	2.56657	2.96012	2.58896	2.49434	1.22336	3.24038	1.66868	2.52932	2.11633	3.91461	2.14745	20.9475	12.3932	35.0132	16.3898	13.182	35.5087	33.1712	16.3483	26.8011	12.6262	31.0791	34.3337	25.477	25.1679	54.0265	18.5791	46.3403	23.1253	35.8412	29.2897
	lmo0429	sugar hydrolase	lmo0429	+	985137	2.1.1	2582	7.27087	3.98834	6.93897	4.30093	7.3456	4.6056	7.20977	4.00026	7.80523	4.37827	6.55906	3.94508	7.73619	5.29291	6.75851	4.43391	5.84787	4.81033	7.95079	4.60169	60.5981	47.8023	72.1425	46.9743	35.8905	85.7016	58.4444	36.11	68.9172	32.7521	61.6508	94.5928	126.657	54.8558	105.286	56.5334	98.2553	64.1171	101.46	62.4966
	lmo0430	LysR family transcriptional regulator	lmo0430	-	986731	1.8	875	41.6631	55.7626	89.8222	66.1557	98.4222	65.3641	87.0445	55.787	86.564	53.5475	110.47	190.12	213.844	121.321	209.998	127.185	180.507	155.641	197.087	130.855	4.96338	1.42375	15.316	3.88345	0.979887	7.08511	4.65759	0.794589	10.4211	2.51932	7.85493	2.65637	9.65856	1.81741	11.5936	0.782611	10.7874	2.38559	13.111	2.36256
	lmo0431	acetyltransferase	lmo0431	+	986199	1.8	569	3.86845	4.06653	2.73997	3.97249	2.52942	3.09619	3.08708	3.88447	3.54924	3.2253	3.79181	2.23468	5.09922	4.41238	4.61498	4.53704	2.0683	4.03674	3.85638	3.25509	25.4264	8.75231	15.6921	3.97883	7.52966	14.5183	14.316	4.88463	22.0214	5.16239	22.419	14.9689	37.1092	11.1723	33.6553	6.01375	33.157	12.8319	23.813	10.8926
	lmo0432	oxidoreductase	lmo0432	+	985147	1.8	746	5.08936	4.48207	5.07752	5.11518	4.32338	4.46261	7.06682	4.3755	4.6694	4.69841	8.40005	4.09242	5.64191	5.17981	6.24261	4.94571	7.3979	5.88047	6.89414	3.7257	15.5213	11.6873	11.9739	6.07212	10.3419	13.8477	12.7445	7.45446	9.16554	9.84793	13.1591	16.6139	26.4285	10.6563	33.2339	7.34208	16.2646	6.99389	29.3525	9.23516
	lmo0433	internalin A	inlA	+	985151	5.2	2402	53.696	86.242	13.6486	19.6408	12.1437	22.8489	15.9878	20.5123	13.6154	15.1851	77.4381	128.914	232.113	131.983	173.683	172.763	220.252	217.899	187.105	105.877	23.5218	12.9755	27.2964	10.8536	6.42982	24.1065	17.545	8.68989	19.9445	10.4086	15.9536	12.5888	30.5151	7.28779	31.463	10.556	20.2242	8.26169	16.0766	11.7705
	lmo0434	internalin B	inlB	+	986892	5.2	1892	15.9461	18.0042	4.3216	4.0744	6.00166	4.14352	4.10551	4.6786	5.4541	4.56155	17.5314	18.1342	24.5668	16.829	21.6653	17.4253	23.1598	21.9453	21.3659	13.5994	59.7178	54.0258	29.1378	14.9758	16.3242	28.4153	20.1165	8.45715	22.3038	9.32666	57.6396	56.5458	32.7768	15.1384	21.46	14.4864	20.6809	9.93553	21.511	17.8571
	lmo0435	peptidoglycan binding protein	lmo0435	+	985154	6	6041	0	0	0	0	0	0	0	0	0	0	0	0	0	0	0	0	0	0	0	0	0	0	0	0	0	0	0	0	0	0	0	0	0	0	0	0	0	0	0	0
	lmo0436	hypothetical protein	lmo0436	-	986537	4.5	485	145.499	194.485	27.8508	31.4489	30.8527	34.027	22.0256	24.6233	32.1532	29.4597	250.19	270.348	34.6873	33.1732	37.7654	32.5789	33.2029	34.1741	33.9865	48.7949	0	5.13253	9.20218	2.33327	0	2.12845	0	1.43222	4.69593	0	2.02261	1.59601	2.90154	3.27583	0	1.41063	2.77771	1.07499	2.14838	0
	lmo0437	hypothetical protein	lmo0437	+	985156	6	845	15.6384	20.5997	15.8236	14.8044	11.1115	13.2119	15.1663	16.4509	13.7708	15.6725	12.0321	18.2182	13.2272	13.2636	15.4056	15.222	16.8966	16.2693	17.0001	14.2554	11.9919	17.6908	28.1939	5.36155	6.08781	12.2273	20.8986	5.75936	9.44181	4.34775	6.97155	13.7529	91.6764	43.2827	100.039	37.2767	73.4024	43.8457	77.7529	39.9568
	lmo0438	lmo0438	lmo0438	+	985161	1.1	617	1.35338	2.63937	3.00853	4.92343	2.23964	1.69227	3.55914	2.98563	3.16069	1.8029	1.57943	5.97722	4.58559	2.71311	4.74023	5.38026	4.64991	4.67093	5.18285	3.56519	30.487	22.1994	33.7711	23.8537	5.55587	8.36914	11.0034	10.1368	5.53937	5.95178	12.7248	27.6125	269.252	74.7079	259.286	78.7626	166.015	82.0016	187.534	62.5122
	lmo0439	hypothetical protein	lmo0439	-	985164	6	1268	14.2004	15.7627	12.3658	10.706	10.4071	12.7226	10.0531	11.8812	9.84019	11.458	13.4057	12.4466	176.249	175.781	181.239	170.353	168.908	193.385	190.886	149.362	15.9892	7.8626	29.3687	16.0846	13.5285	21.1939	35.3669	11.5187	22.4805	9.27521	19.3654	16.5034	48.8941	15.6821	29.3448	17.828	30.8503	17.703	30.4429	12.5035
	lmo0440	lmo0440	lmo0440	+	985165	3.5.2	503	98.6646	138.994	49.1378	58.5454	38.4472	47.4668	42.9144	42.1533	49.1371	44.6562	217.876	280.532	95.7319	73.5733	88.9658	61.4694	73.8293	86.8249	87.3523	79.2641	46.0097	64.3399	183.386	69.748	34.0627	57.4681	91.7472	31.7646	49.8103	42.3285	31.206	30.7802	44.7666	18.953	49.2573	19.0435	58.927	31.0978	35.218	17.7942
	lmo0441	D-alanyl-D-alanine carboxypeptidase	lmo0441	-	985168	5.2	2036	165.769	216.161	117.708	139.053	110.868	136.055	108.664	155.177	133.392	143.992	149.709	181.998	92.8186	142.179	99.8765	102.446	89.1287	115.442	89.0725	130.963	315.19	210.623	224.674	170.346	142.01	218.362	195.624	135.658	192.706	142.289	486.91	396.779	467.973	241.504	447.609	226.84	379.74	260.324	373.153	247.566
	lmo0442	lmo0442	lmo0442	+	985171	3.5.2	314	9.41387	11.9916	10.3883	7.86221	14.6466	12.6578	9.77576	10.5436	10.8517	13.0874	48.2509	33.7649	28.3735	33.1656	28.0895	21.7813	25.7306	33.2026	28.1122	28.5305	4.60097	19.7969	14.1976	3.5999	10.9001	9.85167	4.31752	6.62914	18.1129	9.34146	24.9648	24.6242	22.3833	12.6353	28.6588	8.70561	12.8568	13.2684	16.5732	0
	lmo0443	LytR family transcriptional regulator	lmo0443	+	985172	4.2	929	960.249	1417.43	472.214	691.089	437.926	736.927	400.649	816.332	530.708	733.391	1083.36	1683.77	387.228	826.633	431.481	578.513	436.949	710.121	436.048	802.136	12.4671	2.68216	3.20592	3.65796	1.84598	7.786	4.38715	2.24535	8.589	6.32809	7.39884	10.0085	12.1303	18.8307	15.7739	11.0575	17.4189	8.4265	13.4724	4.45075
	lmo0444	hypothetical protein	lmo0444	+	985173	2.2	2780	0	0	0	0	0	0	0	0	0	0	55.8064	76.6275	39.8463	41.5083	42.6729	31.7122	37.7291	39.1877	37.1946	48.4949	0	0	0	0	0	0	0	0	0	0	20.501	16.4559	38.0299	9.73207	30.0268	10.8468	24.7566	13.3382	24.4039	12.8993
	lmo0445	transcripitonal regulator	lmo0445	+	985175	1.2	1487	0	0	0	0	0	0	0	0	0	0	12.7446	15.4085	98.0084	79.7873	89.9989	86.4024	96.3625	94.2138	90.6605	70.6062	0	0	0	0	0	0	0	0	0	0	9.24855	19.8085	18.0059	5.34964	21.2341	4.14658	14.5158	6.31988	13.3321	6.49068
	lmo0446	penicillin acylase	pva	+	985176	5.1	989	0	0	0	0	0	0	0	0	0	0	0.774671	0.643316	1.61475	0.78168	1.57011	0.852975	1.33969	1.22548	1.45908	0.702803	0	0	0	0	0	0	0	0	0	0	4.96459	8.61845	15.6683	2.4122	11.3984	4.84744	14.9996	5.2772	15.8199	4.18101
	lmo0447	glutamate decarboxylase	gadD1	+	986724	5.2	1388	0	0	0	0	0	0	0	0	0	0	0.602336	0.183408	0.889335	0.324997	1.07604	0.569955	0.848762	0.542142	1.31124	0.459175	0	0	0	0	0	0	0	0	0	0	24.0616	15.6361	29.4416	18.339	35.7461	16.7813	23.3255	14.2929	21.7993	10.9266
	lmo0448	amino acid antiporter	gadT1	+	985174	6	1451	0	0	0	0	0	0	0	0	0	0	1.00835	0.921112	2.20194	0.532964	2.34693	0.43618	1.92835	0.720305	1.73014	0.958368	0	0	0	0	0	0	0	0	0	0	104.256	71.0488	116.541	52.0816	99.4769	47.6875	80.8863	47.4948	76.942	46.0861
	lmo0448a	hypothetical protein	lmo0448a	+	16695811	5.2	155	0	0	0	0	0	0	0	0	0	0	2.23463	2.44955	6.98692	0	4.59885	0.338319	3.30629	2.1454	4.02589	0.371675	0	0	0	0	0	0	0	0	0	0	12.6024	34.8053	0	5.10273	14.4672	0	0	6.69799	0	0
	lmo0449	lmo0449	lmo0449	+	985180	5.2	725	156.993	190.263	84.5122	88.4986	87.8566	87.062	78.4687	88.9522	78.2168	88.2454	145.011	171.59	73.7649	54.7176	75.5136	69.0619	77.3368	70.1289	69.811	56.7034	163.696	73.8702	141.683	85.9066	63.8465	119.686	119.891	61.3607	102.165	85.1154	75.8228	67.3094	122.368	60.305	118.129	55.7141	83.6755	66.2049	93.481	45.611
	lmo0450	hypothetical protein	lmo0450	-	985181	5.2	665	28.8842	18.5619	23.7852	15.087	22.6873	17.9604	23.1184	16.2269	23.4631	18.9045	47.0037	42.0764	35.4591	28.0806	34.5604	30.272	33.5225	29.0837	36.2113	26.7271	41.3466	18.7268	22.3837	37.4584	38.6658	18.6383	36.7572	30.3089	18.8472	23.1959	29.5192	16.3052	14.8214	9.56187	15.2492	7.20566	14.1888	10.1978	14.1096	8.28668
	lmo0451	lmo0451	lmo0451	-	985185	5.2	755	42.2417	44.855	38.9561	29.2025	32.6496	19.4536	33.5557	20.9198	28.9748	18.2015	73.2248	101.177	65.4552	36.9359	59.3105	40.4211	55.8471	45.1556	54.8288	31.2915	13.4195	24.7461	29.5784	8.99974	13.6251	5.47315	26.9845	13.8107	16.6034	7.78455	11.7022	8.20805	7.46111	5.26472	32.8382	7.25468	8.92834	10.3659	13.811	7.30017
	lmo0452	hypothetical protein	lmo0452	-	985178	1.2	2159	157.421	178.494	181.107	203.861	188.338	220.967	160.214	215.484	193.619	212.239	173.559	191.33	152.46	158.355	169.668	153.324	156.065	171.079	172.071	156.361	40.9295	36.3768	51.7623	30.9741	19.4725	38.791	36.519	20.624	42.2633	20.0939	47.7842	28.01	21.5439	8.84473	28.211	16.8218	24.9994	14.0286	22.7191	16.9273
	lmo0453	hypothetical protein	lmo0453	-	985179	5.2	1148	126.791	151.076	162.658	159.441	158.356	167.99	137.384	167.054	155.975	165.238	154.125	221.496	191.367	191.558	179.095	163.754	171.35	201.785	183.93	167.03	88.2954	62.9572	84.3333	34.5421	32.871	64.8204	65.1009	39.9826	78.4575	23.689	60.7417	54.6811	56.4551	34.6399	65.8012	34.6065	59.9201	35.0114	64.5186	44.43
	lmo0454	hypothetical protein	lmo0454	-	985184	2.2	947	258.423	323.111	251.903	311.926	299.973	330.061	246.328	335.881	305.535	352.711	245.419	368.962	294.871	376.047	305.358	347.955	287.582	386.491	329.919	349.478	47.3929	30.2592	64.4735	17.9425	32.5968	55.6495	50.2116	33.0408	50.5555	29.4877	44.587	14.7277	59.5	38.6257	61.8976	27.4805	64.0806	19.2885	51.765	22.5589
	lmo0455	hypothetical protein	lmo0455	+	985188	3.5.2	1595	34.3492	29.2618	43.6159	32.2321	31.8707	31.2486	35.97	31.8751	34.9679	27.052	36.9134	31.2057	26.3156	16.2838	23.487	16.1376	20.7291	16.1208	21.9184	16.9657	18.1617	10.9404	28.0217	13.4996	4.8405	20.7404	17.0428	2.61677	15.7296	7.37484	13.55	9.72006	37.9927	7.98021	37.4733	5.58419	26.2211	6.87425	26.8224	6.91595
	lmo0456	permease	lmo0456	+	985191	1.8	1283	3.37539	1.73837	1.9114	0.771526	2.24575	0.916319	2.74087	1.84759	2.22757	1.17147	2.49777	1.93446	2.0939	0.602697	2.09527	1.10981	1.72157	1.10779	2.44564	1.39986	7.9012	12.6275	13.9323	4.41576	8.02225	15.3069	6.35522	6.50523	8.88715	4.58343	4.5934	4.22868	15.3755	11.1592	26.3654	6.9411	13.6679	6.5102	19.5161	6.44735
	lmo0457	hypothetical protein	lmo0457	+	985189	6	1100	4.55796	2.49516	3.78271	2.82783	3.4571	3.02776	3.99554	1.81951	2.7879	2.63116	4.68602	2.42953	3.16791	2.87007	3.58384	1.67777	2.61003	2.54584	2.73805	2.58046	17.1126	11.3279	13.54	5.14972	6.2371	15.9721	23.4699	10.7475	19.6922	4.67709	6.2497	6.34055	14.0887	10.122	18.4486	11.2082	14.7135	4.27065	14.2249	5.63923
	lmo0458	hydantoinase	lmo0458	+	985192	6	1550	5.63767	2.15868	3.88397	2.37235	4.87097	3.91931	4.44353	3.33097	4.13798	3.12492	4.27043	1.7657	3.60743	2.07894	3.73897	2.10975	4.22811	2.15785	4.94009	2.01869	42.0495	22.5156	30.757	20.4714	14.3894	35.3479	29.8134	15.7073	29.429	18.4977	20.9146	9.00187	24.5481	10.2647	24.0094	11.4924	20.0188	9.09476	20.1956	8.89576
	lmo0459	transcriptional regulator	lmo0459	+	985370	6	1538	21.195	30.1224	28.2213	16.69	17.1626	13.2087	16.1977	11.578	16.681	12.2351	0	0	0	0	0	0	0	0	0	0	66.8621	84.2815	60.0563	79.5767	33.4652	68.5584	56.5569	25.78	74.8876	35.3719	0.638719	0	0	0	0	0	0	0	0	0
	lmo0460	membrane associated lipoprotein	lmo0460	+	985198	4.4	2069	7.67697	5.01822	7.61671	3.45254	7.10437	3.63134	6.23382	3.76919	6.40317	3.71398	0	0	0	0	0	0	0	0	0	0	41.3087	30.1257	25.9261	13.6953	14.099	38.9784	24.9665	14.4592	32.5244	16.3476	0	0	0	0	0	0	0	0	0	0
	lmo0461	lmo0461	lmo0461	+	985193	6	473	6.25605	4.16567	7.06051	2.83637	3.89339	2.89588	4.94975	2.78047	3.5322	4.11359	0	0	0	0	0	0	0	0	0	0	15.288	10.5249	6.2901	7.17701	1.81093	4.36467	5.73847	1.46848	7.22221	10.8639	0	0	0	0	0	0	0	0	0	0
	lmo0462	lmo0462	lmo0462	+	985196	6	485	17.0531	11.3052	10.7118	12.5213	11.1544	6.45571	10.4094	7.37615	9.04308	6.64848	0	0	0	0	0	0	0	0	0	0	5.96422	5.13253	27.6065	6.9998	3.53243	4.2569	19.5887	2.86444	25.8276	6.05465	0	0	0	0	0	0	0	0	0	0
	lmo0463	lmo0463	lmo0463	+	985195	5.1	305	18.3876	10.0999	11.1799	9.4809	10.9311	11.3212	9.58408	9.81998	10.7149	3.64116	0	0	0	0	0	0	0	0	0	0	37.8903	28.5308	14.6152	14.8231	16.831	23.6633	13.3335	36.3953	33.5621	26.4446	0	0	0	0	0	0	0	0	0	0
	lmo0464	transposase	lmo0464	+	985200	6	266	41.2925	24.1149	20.055	22.5266	20.9516	15.6678	21.968	12.8339	22.2085	14.8142	0	0	0	0	0	0	0	0	0	0	21.7124	18.6847	11.1667	12.7412	9.64473	19.3713	20.3748	10.4279	4.27382	5.51041	0	0	0	0	0	0	0	0	0	0
	lmo0464a	hypothetical protein	lmo0464a	+	16695812	6	164	0	0	0	0	0	0	0	0	0	0	0	0	0	0	0	0	0	0	0	0	0	0	0	0	0	0	0	0	0	0	0	0	0	0	0	0	0	0	0	0
	lmo0465	hypothetical protein	lmo0465	-	985197	3.2	236	0	0	0	0	0	0	0	0	0	0	0	0	0	0	0	0	0	0	0	0	0	0	0	0	0	0	0	0	0	0	0	0	0	0	0	0	0	0	0	0
	lmo0466	lmo0466	lmo0466	+	985199	5.2	1730	0	0	0	0	0	0	0	0	0	0	0	0	0	0	0	0	0	0	0	0	0	0	0	0	0	0	0	0	0	0	0	0	0	0	0	0	0	0	0	0
	lmo0467	lmo0467	lmo0467	+	985201	5.1	323	0	0	0	0	0	0	0	0	0	0	0	0	0	0	0	0	0	0	0	0	0	0	0	0	0	0	0	0	0	0	0	0	0	0	0	0	0	0	0	0
	lmo0468	lmo0468	lmo0468	+	984468	5.1	305	0	0	0	0	0	0	0	0	0	0	0	0	0	0	0	0	0	0	0	0	0	0	0	0	0	0	0	0	0	0	0	0	0	0	0	0	0	0	0	0
	lmo0469	lmo0469	lmo0469	+	985204	6	872	0	0	0	0	0	0	0	0	0	0	0	0	0	0	0	0	0	0	0	0	0	0	0	0	0	0	0	0	0	0	0	0	0	0	0	0	0	0	0	0
	lmo0470	hypothetical protein	lmo0470	+	985233	5.1	629	0	0	0	0	0	0	0	0	0	0	0	0	0	0	0	0	0	0	0	0	0	0	0	0	0	0	0	0	0	0	0	0	0	0	0	0	0	0	0	0
	lmo0471	lmo0471	lmo0471	+	985203	4.2	1010	0	0	0	0	0	0	0	0	0	0	0	0	0	0	0	0	0	0	0	0	0	0	0	0	0	0	0	0	0	0	0	0	0	0	0	0	0	0	0	0
	lmo0472	lmo0472	lmo0472	+	985207	5.2	887	0	0	0	0	0	0	0	0.0593669	0	0	0	0	0	0	0	0	0	0	0	0	0	0	0	0	0	0	0	0	0	0	0	0	0	0	0	0	0	0	0	0
	lmo0473	hypothetical protein	lmo0473	+	986271	5.2	1022	0.445954	0.167838	0.218096	0.622521	0.338245	0.383367	0.286679	0.154598	0.340962	0.272286	0	0	0	0	0	0	0	0	0	0	1.41672	0	1.45724	1.10847	0	2.02234	1.32944	0	1.11545	0.719101	0	0	0	0	0	0	0	0	0	0
	lmo0474	lmo0474	lmo0474	+	985208	5.2	347	5.02531	9.37431	7.90723	7.52333	4.8059	3.3809	5.89917	4.54464	5.41248	1.60085	2.20381	5.12435	2.50565	1.4825	1.88976	0.758302	1.69386	0.360649	1.2633	1.16629	49.9761	32.2553	72.8241	13.0341	0	20.8074	7.81619	8.00069	6.5581	4.22782	56.4936	62.4095	64.8344	9.14972	64.8529	9.8501	27.1545	6.00509	24.0025	5.94712
	lmo0475	lmo0475	lmo0475	+	985206	3.5.2	242	2.19031	2.8263	4.59079	0.582386	0.474657	0.806964	0.905163	1.51862	0.861246	1.14629	1.14766	2.09673	0.299029	0.265385	0.984115	0.434385	0	0.516486	0.775357	0.238606	232.605	153.976	184.044	46.6653	70.6487	51.0828	55.9678	74.4755	56.3511	33.3006	283.165	197.905	150.88	26.2066	148.601	47.9615	116.664	45.1494	55.8578	25.5506
	lmo0476	oxetanocin A resistance protein OxrB	lmo0476	-	985213	5.2	977	51.312	43.9778	14.7525	15.2662	15.0369	16.7086	18.2921	18.8663	19.9724	17.6015	65.3718	46.1057	20.1349	17.6717	22.9237	17.4847	22.3762	17.1106	25.2372	16.7778	4.44572	0	4.57286	3.47843	0	3.17309	2.78122	2.13515	1.16678	0.752188	3.0153	0.793109	5.76748	1.62786	10.3844	1.40198	6.90166	2.13678	3.20279	2.11615
	lmo0477	secreted protein	lmo0477	+	985893	5.2	377	390.233	569.147	623.101	772.369	526.055	587.066	671.308	518.391	671.956	494.313	299.908	327.54	125.72	142.626	131.748	113.095	129.628	145.981	139.897	158.758	7.66828	6.59897	19.719	14.9996	2.27085	10.9463	10.7938	11.0486	9.05643	1.94614	0	6.15604	0	0	11.9412	1.81367	7.14267	1.38213	0	0
	lmo0478	secreted protein	lmo0478	+	985211	5.2	377	99.7709	146.488	201.667	138.712	117.935	102.196	134.805	87.3051	140.629	75.7534	211.559	279.521	75.5474	40.4333	79.0807	41.6079	63.157	52.5708	66.1269	49.3914	3.83414	9.89845	39.4379	11.9997	6.81255	5.47315	21.5876	1.84143	6.03762	1.94614	10.402	26.6762	26.1139	0	32.8382	5.44101	17.8567	6.91063	5.52439	10.9503
	lmo0479	secreted protein	lmo0479	+	985210	5.2	359	197.691	342.919	311.531	300.337	266.567	241.121	272.296	208.675	311.405	224.386	177.593	248.031	80.334	77.7446	88.6811	64.0664	67.7475	66.2393	75.3647	90.3541	20.1292	27.7157	66.2557	15.7496	19.0751	54.5947	15.1113	13.5345	47.5462	16.3476	19.1137	28.01	31.3367	8.84473	65.8257	7.61741	22.4994	11.6099	26.1028	19.163
	lmo0480	transcriptional regulator	lmo0480	+	985214	5.2	560	12.4692	7.65142	9.27977	3.15329	12.336	3.61192	9.67121	5.82621	12.1864	5.95826	25.7257	25.7705	11.7868	6.20746	11.8291	6.96178	10.6387	7.97929	11.3069	6.40791	15.5006	6.66954	26.5731	4.04267	3.06018	22.1268	14.5456	7.44449	18.3066	2.6226	14.0177	2.76528	17.5954	5.67576	36.2067	6.11022	19.2508	4.65636	29.7785	6.14854
	lmo0481	hypothetical protein	lmo0481	+	985215		1700	49.0361	40.1234	26.408	24.5434	35.2263	26.0918	29.3532	24.4839	30.7588	26.2992	63.5722	57.2109	28.9203	21.9132	26.9577	23.3327	26.0338	22.9713	28.2821	23.7924	10.2244	4.39931	15.7752	3.99989	4.03707	9.73005	10.394	6.13809	14.0878	7.35208	8.09044	3.19202	14.9222	6.55165	15.9216	6.85164	16.6662	7.06419	14.1179	6.89461
	lmo0482	ribosomal RNA large subunit methyltransferase N	lmo0482	+	986229	5.2	1103	290.09	190.516	104.348	83.6428	131.901	102.723	114.493	110.02	128.464	110.511	312.226	236.408	54.827	71.323	69.5325	65.3508	52.5927	57.9783	60.3009	73.9996	10.5022	6.77829	12.1529	2.05429	0.777519	20.6136	9.8552	3.78293	15.5042	3.3317	3.56155	4.21555	19.1596	5.7683	23.5092	8.0728	13.4507	8.04487	25.5353	9.99806
	lmo0483	lmo0483	lmo0483	+	985216	3.5.2	479	199.117	155.601	58.412	72.2341	68.2438	80.888	63.848	102.141	60.8955	85.4216	299.362	264.705	58.1311	69.3253	71.2438	90.6019	65.8543	78.1798	61.7572	61.6051	18.1163	5.19669	9.31721	7.0873	3.57659	2.15505	11.3335	5.8005	11.8866	4.59775	12.2874	8.0798	85.1965	51.41	91.6858	111.405	81.5604	84.897	108.762	68.9866
	lmo0484	lmo0484	lmo0484	+	985220	1.4	365	35.9401	39.8752	95.5034	172.26	124.953	116.262	167.871	119.551	133.232	129.228	42.0989	69.4307	164.784	244.387	161.06	309.745	162.667	192.374	173.826	216.4	3.95985	3.40766	20.3655	9.29482	7.03591	22.6104	40.8748	3.80361	53.0024	8.03978	13.4288	8.47717	57.793	15.2245	33.9149	11.2388	51.638	14.2744	34.2331	26.3883
	lmo0485	lmo0485	lmo0485	+	985219	2.2	575	29.3052	46.0544	152.228	167.563	172.712	172.829	178.331	177.831	169.921	163.26	29.2922	72.3128	159.079	220.896	143.131	205.797	151.204	164.363	154.611	213.303	15.0969	10.8264	12.9406	13.7809	8.94147	23.3464	9.44457	6.04219	27.7353	3.83146	18.7723	12.1197	44.0672	15.2019	21.5501	10.712	23.4369	11.7913	27.1904	17.9653
	lmo0486	50S ribosomal protein L32	rpmF	+	985221	2.2	170	339.712	612.992	1060.76	2084.31	1623.21	2094.71	1469.37	2393.57	1901.49	2376.95	362.872	775.806	1195.77	1486.25	1191.15	1935.5	1095.77	1400.38	1433.11	1542.78	0	21.8808	0	6.63139	10.0395	12.0985	7.95332	4.07053	20.0195	4.30199	11.4969	13.6081	8.24649	0	6.59907	12.0275	15.7891	12.2209	18.3177	0
	lmo0487	lmo0487	lmo0487	+	985223	3.5.2	728	93.5576	115.054	56.6197	66.295	65.2653	77.8272	66.9821	81.7162	69.1867	82.1508	96.8817	138.821	78.2458	96.3348	79.4673	101.139	74.1885	95.2055	88.0461	91.3066	3.97615	0	4.08986	3.11102	0	1.41897	1.86559	0	4.69593	1.00911	8.09044	2.12801	17.4093	6.55165	20.1231	3.76168	3.70361	4.29994	11.458	12.3021
	lmo0488	LysR family transcriptional regulator	lmo0488	-	985225	4.2	893	7.82464	12.3876	9.48352	9.26053	8.64417	11.4058	8.69321	10.1426	7.9593	10.3443	11.854	13.3931	8.20924	7.35776	8.96106	7.49752	8.48922	8.79759	7.6573	10.2472	24.3172	30.6918	21.6776	34.2473	17.2828	18.5132	27.3829	15.5718	15.3169	13.9887	65.9724	51.1901	37.8564	12.4657	34.0804	16.8708	27.1805	19.2848	36.2052	30.0948
	lmo0489	NADH:flavin oxidoreductase	lmo0489	+	984913	2.4	1994	12.9202	14.76	10.7362	14.684	14.1358	13.1056	11.8338	13.371	15.8754	15.4703	20.2696	23.943	14.1321	19.8153	15.3433	19.8942	13.4439	17.2374	16.7477	22.9309	20.3411	11.8781	18.6811	14.2101	8.60533	29.555	15.6794	11.5138	21.1634	7.0061	24.1436	11.2753	30.3942	9.57625	20.9285	10.3093	20.3002	13.0938	16.7476	7.26175
	lmo0490	shikimate 5-dehydrogenase	aroE	+	985396	5.2	875	72.9971	56.6446	42.1095	45.5578	36.8013	50.4408	43.1038	50.4309	39.579	50.5585	98.2134	76.9204	36.6638	41.0784	39.9249	35.5467	34.7387	41.2145	33.7679	36.8671	18.199	11.39	15.316	20.7117	13.7184	18.8936	20.1829	15.0972	26.0527	15.1159	13.4656	13.2819	24.1464	9.99576	19.3226	7.82611	27.739	9.54234	26.222	11.0253
	lmo0491	3-dehydroquinate dehydratase	aroD	+	985226	5.2	758	86.6539	69.7876	42.8195	55.657	52.1241	58.5607	47.2366	75.9858	47.9779	67.3801	122.539	108.413	46.6236	57.0117	48.8362	54.3772	45.5301	59.9695	51.1368	53.7033	22.9139	21.3619	11.7846	11.9522	4.52375	21.8061	10.7511	7.3366	30.0688	8.723	14.2462	12.2634	13.0053	4.19513	7.43373	8.12925	7.11444	8.25997	9.62948	11.8159
	lmo0492	LysR family transcriptional regulator	lmo0492	-	985232	1.1	908	126.558	211.27	98.9974	88.4304	93.5168	73.2739	68.1561	64.8968	83.1145	66.5575	211.922	345.556	94.2473	56.8975	105.627	56.4938	76.1149	79.3444	86.5022	73.7363	12.7552	24.6971	37.7198	13.7224	9.44314	10.2418	17.954	13.0176	16.3195	5.66499	16.2209	20.4795	37.2317	1.75143	16.1383	6.03359	10.3958	10.9202	3.44591	4.55357
	lmo0493	acylase	lmo0493	-	985231	2.1.1	1760	5.52668	5.65501	5.87026	6.58979	5.30532	6.45846	6.70314	5.62802	5.66485	5.63108	8.78928	6.25672	6.76711	5.85927	7.57073	5.42464	5.35573	6.08168	5.95585	6.12409	37.0351	19.8306	43.1734	30.2649	19.985	37.0067	44.021	12.6484	36.9354	17.5451	35.1665	28.6303	44.0421	18.9853	54.4676	20.6332	46.762	21.9539	34.9816	17.6286
	lmo0494	hypothetical protein	lmo0494	+	985230	2.1.1	593	38.4016	24.8586	29.548	27.3986	36.4083	32.3519	33.9436	39.6715	28.1862	32.3567	53.7575	48.7848	29.8485	35.5013	29.5906	34.2078	27.042	35.6375	30.9791	34.3593	0	0	7.52906	1.90904	1.44509	8.70729	4.57918	3.51545	9.6053	2.4769	13.2389	1.30583	14.2439	5.36044	18.9973	2.30831	13.636	6.15674	10.5466	8.12974
	lmo0495	hypothetical protein	lmo0495	+	985247	2.1.1	959	11.8805	4.56073	13.3248	4.27508	12.9759	5.31083	11.3032	5.82092	10.1735	5.04869	8.06142	6.30249	7.87193	2.68703	6.53898	3.84838	6.83104	3.57343	6.86918	3.44264	1.50969	7.79503	6.21147	4.72487	0.894147	12.9303	5.66674	6.52556	5.94328	3.06517	5.11973	0	7.34453	2.48758	9.40367	5.71306	5.62485	4.35369	6.52569	4.31166
	lmo0496	hypothetical protein	lmo0496	+	984435	3.5.2	224	17.9105	24.8008	67.76	24.8446	34.0898	12.2013	34.2152	11.9494	31.935	9.40875	26.9585	53.7813	56.1934	12.6111	55.2679	21.5803	35.0404	26.2168	47.731	22.1617	0	0	0	5.03986	0	0	0	0	0	0	0	0	0	0	0	0	0	0	0	0
	lmo0497	sugar transferase	lmo0497	-	984596	2.1.1	1508	112.365	148.486	72.4979	61.194	62.2187	54.4484	55.4867	49.2592	60.7461	51.4272	143.691	183.341	44.2051	33.5905	48.137	36.6192	38.868	38.758	39.9964	36.8098	2.88132	4.13255	9.87908	3.00588	0.568841	4.79853	4.50635	1.38382	2.26861	0.487502	1.30283	3.08414	5.60696	2.63759	5.23465	1.81728	7.15687	2.42353	9.68691	0.914336
	lmo0498	5-phosphate isomerase	lmo0498	+	985236	1.2	449	0.675867	1.33543	1.48741	0.471733	1.02526	1.59779	0.977576	1.64011	1.86029	0.495197	0.464803	0.424589	0.322951	0.429924	0.664278	0.58642	0.491221	0.464837	0.837386	0.386542	12.8827	2.77157	29.8151	20.1594	1.90751	32.1821	15.1113	12.3744	25.358	8.17378	30.5819	12.0658	50.1386	7.07579	35.107	10.6644	29.9992	8.1269	30.1632	3.06607
	lmo0499	ribulose-5-phosphate 3 epimerase	lmo0499	+	985241	6	668	1.36386	0.641622	1.334	2.22116	0.862045	1.46556	1.64391	0.709208	1.45987	0.832731	0.521079	0.475996	0.868926	0.86756	1.25111	0.788906	0.770974	1.18815	0.563264	0.693348	12.9983	16.7785	31.1966	10.1701	5.13232	13.916	12.1975	6.24269	15.3513	5.49806	16.1627	6.9566	27.402	5.94937	21.9278	6.14858	24.2146	10.933	24.9713	4.12476
	lmo0500	transaldolase	lmo0500	+	985240	2.1.1	650	1.28477	1.05498	1.14241	0.543471	2.2147	1.00406	1.80198	1.37665	1.50023	1.11248	1.07097	0.586989	1.22781	1.08967	1.92855	0.810719	1.81095	1.02821	2.41183	0.801584	24.489	15.3266	25.1894	5.22566	7.91135	25.4237	14.6238	6.4153	15.7757	6.78009	25.6694	17.8724	23.8274	9.78219	24.2675	6.31859	22.8105	7.22272	24.0578	8.47762
	lmo0501	transcriptional antiterminator BglG	lmo0501	+	985244	2.1.1	2060	1.47569	1.33293	2.77853	1.09865	1.65093	1.14173	1.81428	1.33009	1.52316	1.05419	1.18399	1.32877	2.46796	1.31418	2.17558	1.22918	2.39533	1.19761	2.28544	1.01277	58.366	31.4676	58.5886	27.5101	20.8244	44.6695	37.6133	21.2769	43.1861	21.0591	42.4483	33.119	34.2103	10.8145	42.1591	12.9729	35.3703	15.2094	28.8764	11.7153
	lmo0502	sugar-phosphate isomerase	lmo0502	+	985250	1.2	602	1.13485	0.996588	2.34336	0.586732	1.33896	0.867185	1.45907	0.786832	1.50397	0.461938	1.38747	1.05619	2.04857	0.85557	1.98292	1.40041	2.1995	1.52633	1.87474	1.15386	36.0524	18.615	39.5556	13.1638	14.2352	42.8866	24.8096	9.23463	28.3858	8.53977	30.9731	18.0087	30.4012	13.2011	20.5852	11.3693	24.6262	8.66407	32.899	13.7287
	lmo0503	PTS fructose transporter subunit IIA	lmo0503	+	985248	1.2	467	2.27455	0.733752	1.27129	0.302393	1.23228	0.838001	2.50661	0.901159	1.04343	0.476151	1.34078	1.08869	2.79477	2.06694	3.44913	0.676639	0.944655	1.43027	4.42848	1.4867	65.0329	45.3044	54.1513	26.6531	23.8439	55.2578	49.4024	20.8223	51.2036	12.575	35.7068	46.4071	36.1577	11.9064	26.5232	7.32443	34.6145	10.047	31.2341	22.1111
	lmo0504	lmo0504	lmo0504	+	985256		398	1.33395	0.430321	2.05032	0.886716	1.30084	0.491459	1.10253	0.528499	1.74839	0	1.22316	1.11734	1.82115	2.74763	2.54723	1.45503	1.47736	1.36306	2.20365	1.45316	123.5	34.3841	52.3071	19.8942	25.816	57.036	30.6771	13.9561	51.4786	14.7497	73.9089	62.2084	31.8079	19.9505	36.7662	8.59107	23.6836	20.9501	41.8691	15.5609
	lmo0505	ribulose-5-phosphate 3-epimerase	lmo0505	+	985251	6	650	0.350392	1.71434	1.25665	0.326083	1.06306	0.602434	1.46411	0.647837	1.17876	0.342302	1.17807	0.586989	2.344	0.990608	2.20406	1.37822	2.60324	1.28526	2.5083	0.445325	222.628	187.751	121.367	83.6105	47.4681	123.94	112.813	53.4608	103.419	49.7207	102.678	140.596	77.9806	17.1188	60.6689	22.1151	43.5473	24.8783	43.3041	21.194
	lmo0506	sorbitol dehydrogenase	lmo0506	+	986275	5.2	1046	1.96079	1.47591	2.84129	1.01375	3.24983	1.56075	2.94113	1.00703	3.13158	1.01097	2.92999	1.88571	5.06635	3.57243	4.91071	2.47002	4.36328	2.75706	5.4586	2.65817	459.57	400.249	122.45	189.536	168.889	185.742	123.402	179.5	189.64	172.844	397.139	356.345	76.7703	96.5571	123.945	92.9804	108.307	101.794	113.685	113.989
	lmo0507	PTS galactitol transporter subunit IIB	lmo0507	+	986799	6	293	1.29311	0.87601	2.78258	1.44408	3.53086	1.55629	2.99258	0.537936	3.08467	0.568467	3.08287	1.94964	2.22441	2.19349	5.89716	2.33371	4.00997	2.13446	4.486	2.95823	14.7888	0	10.1412	0	0	7.03691	4.62591	0	3.88133	2.50218	23.4045	13.1915	9.59285	5.41514	15.3529	0	4.59172	3.55404	14.2056	11.7324
	lmo0508	PTS galactitol transporter subunit IIC	lmo0508	+	985255	3.5.2	1271	3.70611	2.29471	4.85281	2.00264	4.26184	1.74715	4.20773	1.5749	4.22295	2.32124	5.09748	2.9541	8.45461	3.95449	8.08413	3.69279	6.54575	4.3414	8.14674	3.41871	23.9272	9.80507	17.5796	12.4808	6.74828	13.8249	10.692	6.5666	17.942	6.94	9.27348	15.8547	15.5205	9.3871	23.9528	5.92865	12.7355	6.57161	17.2377	11.9316
	lmo0509	phosphoribosyl pyrophosphate synthetase	prs	+	985257	1.8	935	353.693	293.684	177.505	179.999	236.228	199.235	202.565	227.317	221.357	228.374	475.007	396.827	176.614	224.47	183.315	185.286	156.813	174.671	179.488	224.368	29.4197	9.32738	9.55611	6.05752	2.75122	14.367	15.9831	8.18019	18.287	9.43128	21.004	11.6018	21.092	8.50455	24.112	7.32443	21.6341	11.7215	20.079	8.1074
	lmo0510	lmo0510	lmo0510	+	985258	5.2	578	21.9307	40.3297	14.3861	13.932	11.6537	9.0313	15.3221	8.64972	13.2534	7.98602	28.7792	36.189	10.6674	4.00965	11.4614	6.56305	11.5806	7.15319	8.67757	6.2087	7.50936	4.30813	54.0688	23.5019	13.3427	17.8657	25.838	16.8305	17.7375	15.2464	22.0706	24.1138	46.2743	8.24897	29.2342	9.47243	13.9893	9.92552	9.0165	13.1063
	lmo0511	hypothetical protein	lmo0511	+	985259	1.1	680	54.7095	59.5018	38.5505	39.796	40.1409	33.4019	42.7421	30.3456	41.4878	34.113	110.775	104.464	41.1869	38.3523	44.0706	41.0753	36.3547	39.6852	47.126	38.9096	44.6922	60.4372	148.856	166.515	121.005	151.898	145.788	114.477	120.646	85.3386	56.2945	79.7302	113.889	63.121	119.307	63.4225	93.1694	79.0186	85.8593	89.1457
	lmo0512	lmo0512	lmo0512	-	985264	2.1.2	359	222.403	279.486	236.334	402.742	324.078	426.319	310.788	477.828	351.711	447.07	269.779	367.8	296.509	451.779	294.773	419.29	299.235	428.58	369.322	412.633	32.2068	10.3934	12.4229	6.29982	7.15318	22.9872	15.1113	11.601	15.8487	14.3041	10.9221	12.9277	11.7512	2.21118	18.8073	9.52177	11.2497	11.6099	20.3021	13.4141
	lmo0513	hypothetical protein	lmo0513	-	985263	5.2	458	108.006	146.074	150.2	204.88	165.725	205.491	157.978	214.087	170.983	201.842	124.707	194.95	188.23	211.731	188.342	189.839	172.248	231.963	193.064	198.45	3.15753	0	3.24783	9.88207	5.61033	9.0146	8.889	1.51647	9.94431	1.6027	2.14159	0	18.4333	6.93704	19.6678	5.97444	8.8233	4.55288	11.3738	1.50298
	lmo0514	internalin	lmo0514	+	985260	1.2	1817	15.4329	16.5276	15.0951	14.9071	14.1163	15.0287	11.6954	13.8899	14.5047	15.4749	34.2082	47.6787	12.7901	16.9912	11.9044	13.1799	9.36238	15.9241	12.2637	18.2746	5.58038	6.17428	18.0399	9.35617	5.19373	14.2248	8.22893	8.80604	13.8088	4.04642	8.65116	7.25315	13.1862	5.2543	13.6555	5.27939	14.1085	5.74745	15.5066	7.58929
	lmo0515	hypothetical protein	lmo0515	+	986558	3.5.2	431	167.207	177.262	50.9577	62.7339	51.3964	65.818	46.5028	58.9414	53.2896	54.936	216.101	217.454	733.872	896.869	722.679	1006.08	886.074	1091.01	852.942	817.24	0	2.88705	41.4098	23.6243	9.93497	9.57802	18.8891	14.5012	23.7731	11.9201	6.82631	17.9551	39.1708	1.84265	15.6728	6.34784	15.6246	3.62808	16.9185	7.98456
	lmo0516	encapsulation protein CapA	lmo0516	-	985267	2.1.1	1430	44.8984	39.7749	31.6504	37.1354	32.805	33.3443	33.3544	33.4874	31.5898	30.6773	57.3939	54.6981	17.7217	18.8373	20.5132	15.7854	15.7561	18.1257	17.8625	20.9073	50.6396	34.8625	23.9604	11.8865	5.99847	20.9632	16.1567	6.3234	17.5433	7.19704	13.7385	9.75674	149.785	30.0387	105.668	39.2848	108.488	48.5569	104.338	36.6386
	lmo0517	phosphoglycerate mutase	lmo0517	-	985270	3.5.2	815	1.21134	1.57811	1.09369	0.433578	1.06012	0.160206	1.07821	0.581446	0.769422	0.477902	2.81957	1.79514	1.51383	1.5806	1.02572	1.48761	1.26417	0.820301	1.23145	1.77639	5.32833	4.58531	5.48071	1.38967	3.15581	3.80304	0	2.55904	4.19526	4.5076	19.2743	13.3079	74.3093	28.2901	69.1447	20.1637	92.6447	44.8174	63.9774	25.3627
	lmo0518	hypothetical protein	lmo0518	-	985271	5.2	368	7.83017	10.702	20.3562	12.6562	18.5984	8.14836	14.7034	11.4293	11.3432	10.1153	10.5809	6.38609	14.7691	5.24298	10.3692	7.43753	21.5658	7.02924	9.87162	5.18532	490.957	381.935	650.437	500.913	458.269	664.387	523.367	462.154	513.345	498.401	0	0	7.64309	4.3145	0	3.71581	10.9753	8.49501	16.9774	16.826
	lmo0519	multidrug resistance protein	lmo0519	+	985272	1.2	1415	216.077	142.718	686.144	378.136	784.828	424.405	713.973	441.809	654.205	414.793	131.563	114.243	323.344	237.415	318.938	226.356	297.646	192.366	325.507	216.078	5.1176	3.52318	6.31675	4.80495	1.2124	6.57474	1.92093	2.45784	4.83521	1.03904	5.55361	4.93005	11.9504	6.18382	7.96921	6.77821	6.67356	5.90331	5.89893	6.33352
	lmo0520	transcriptional regulator	lmo0520	+	985284	5.2	1004	1.43748	0.683375	2.22002	0.704079	2.35274	0.975583	1.89679	0.839288	2.013	0.44346	0.763109	0.126743	1.08454	0.0641678	1.4277	0.577668	0.953115	0.374645	0.749898	0.346157	0	0	4.45001	2.25665	5.97877	3.08784	1.35325	2.77039	1.13543	2.19594	0.978098	0.771802	7.01567	3.16826	6.73696	3.41078	6.71624	5.19844	8.31133	1.37287
	lmo0521	6-phospho-beta-glucosidase	lmo0521	-	985300	3.5.2	1316	64.0842	82.5245	33.4866	54.0505	38.7975	61.4928	40.3612	65.6871	37.8732	51.6489	73.1614	94.6862	45.0218	52.1981	47.1652	52.2168	46.3247	57.5593	44.9213	50.3209	6.60276	4.73502	22.6386	16.3594	5.86593	19.636	12.392	7.92779	22.5276	7.26144	25.3771	10.6013	24.6268	10.2752	33.4162	10.411	25.6258	7.93384	14.2703	11.524
	lmo0522	transcriptional regulator	lmo0522	+	985274	6	752	32.4134	43.3235	48.099	63.5242	45.3401	57.1176	54.4288	57.1984	48.8234	57.3374	50.1839	69.6089	66.681	72.6246	63.9136	76.6084	72.3132	82.615	76.8994	71.9183	17.3224	28.1573	19.7975	9.0356	14.8193	20.6061	19.8675	14.7901	18.185	7.81556	18.276	19.5718	84.2719	61.3141	122.885	71.9254	86.0536	60.362	110.928	50.3886
	lmo0523	hypothetical protein	lmo0523	+	985275	1.8	443	7.02126	7.34743	19.9327	12.4308	10.521	12.6606	16.0177	11.3984	13.8265	10.2887	14.4466	18.504	19.4752	12.2005	18.8511	10.4605	14.6039	16.018	15.701	11.4918	26.1136	70.2255	50.3633	45.9717	36.7325	32.617	39.8203	47.0311	35.9809	31.4801	26.5673	27.9517	308.073	141.635	317.692	143.599	279.722	147.084	251.621	99.4402
	lmo0524	sulfate transporter	lmo0524	-	985278	2.1.1	1661	153.397	184.508	76.3844	98.3486	82.6545	101.232	80.0677	111.526	87.9776	107.062	176.65	184.665	439.219	487.118	452.093	561.566	433.365	552.644	481.195	405.276	61.0418	45.7759	93.2842	66.1822	40.285	80.2894	69.5557	35.5987	70.032	42.9345	68.0166	41.0699	56.8472	31.6111	62.4648	27.6372	42.2372	27.9768	31.4113	25.7351
	lmo0525	lmo0525	lmo0525	+	985282	5.2	1331	75.7497	81.2085	73.5332	67.785	85.7701	79.2515	78.2171	85.607	83.116	81.557	83.4341	95.915	106.377	93.3439	108.259	104.05	97.2484	100.662	105.522	89.1484	7.61647	6.55438	8.95347	3.40531	5.15544	7.76596	5.10517	3.65797	6.85351	3.31369	5.16585	6.98794	6.35202	5.37855	7.6246	3.08814	7.09441	5.09892	7.83867	3.62542
	lmo0526	transcriptional regulator	lmo0526	-	985281	6	740	61.6695	70.4402	38.0385	54.8127	41.6382	43.0468	46.8999	42.6865	44.9068	44.0565	71.7903	90.8483	36.381	34.8987	38.8078	30.7693	32.7149	37.3187	39.9199	38.2629	5.86763	1.68314	24.1418	6.12128	5.79205	8.37592	5.50614	6.57546	3.07992	7.94213	1.32657	6.28066	19.0304	6.44555	21.3201	7.40153	21.8618	12.6909	23.9539	11.1719
	lmo0527	transmembrane protein	lmo0527	+	985287	6	1475	42.6023	41.4704	78.8048	47.6047	72.0103	38.129	72.9208	34.788	59.0321	41.8955	36.6079	42.8472	58.2395	31.1957	55.0864	32.1816	42.9319	35.2312	49.5709	27.0658	13.7468	3.37996	8.07996	0.768271	5.23403	9.81163	7.37137	2.82951	13.1429	1.9936	7.32579	6.30619	13.3754	4.85382	21.4067	2.32238	12.8045	4.24751	10.6109	7.94561
	lmo0528	hypothetical secreted protein	lmo0528	+	985299	5.2	1496	41.2428	31.1396	40.34	31.1022	36.0587	24.8881	36.1449	26.0243	33.4591	24.0776	39.96	35.3966	56.0148	41.3985	51.6779	40.2268	41.9359	38.1185	49.0852	31.2952	9.6814	4.99882	10.9541	1.51499	1.7202	11.056	6.35947	1.39491	9.90944	1.96564	11.8195	9.84473	14.1298	4.25398	12.8146	4.57961	13.5267	6.28188	11.857	3.68666
	lmo0529	glucosaminyltransferase	lmo0529	+	985294	5.2	1250	38.1695	23.4009	38.8202	31.7317	33.0535	27.4832	42.0217	30.0883	35.5217	30.0147	39.5695	33.9569	57.7362	51.8074	57.73	44.1714	47.6496	46.2162	51.5585	36.2904	17.3778	12.9606	8.34154	9.97094	5.48925	14.8838	19.5686	13.3537	14.5945	9.99671	24.3586	20.4611	25.926	14.6352	26.1589	13.1524	19.424	9.18765	25.0386	18.1979
	lmo0530	lmo0530	lmo0530	+	984571	3.5.2	2051	101.232	65.6	111.592	111.933	93.0827	96.9949	121.983	100.374	104.981	93.474	110.527	81.4416	162.077	154.15	154.474	147.891	137.815	148.911	150.43	108.644	19.0698	12.7638	28.333	10.4997	6.69303	23.693	13.9183	6.10579	22.8	6.09448	20.1196	11.7181	32.2987	9.31024	38.4946	18.3753	21.71	12.2209	30.5295	11.7667
	lmo0531	lmo0531	lmo0531	+	985297	2.1.1	854	83.1495	53.0155	97.5953	99.1467	91.6662	96.7082	105.647	111.91	94.8911	99.1047	111.471	66.9659	151.617	156.885	153.903	156.173	145.987	162.84	152.272	121.93	33.9019	26.2569	43.5893	14.5891	11.0435	39.9252	25.4506	12.2116	21.3541	7.74358	32.1914	29.0306	47.8296	24.2066	29.0359	11.2257	39.4727	17.1093	24.4236	17.7509
	lmo0532	lmo0532	lmo0532	+	985308	2.2	830	23.9726	15.1863	15.5722	9.53684	13.6717	11.4053	16.8517	10.5309	11.6688	8.44696	19.7164	15.6347	15.8269	7.91557	16.475	8.63753	12.7682	7.24944	14.6618	7.74479	74.9942	31.5178	37.6725	34.1145	35.1203	47.3023	19.6392	34.3423	54.9271	36.2951	57.962	39.2031	23.757	22.9899	32.5903	25.5747	21.1186	27.0338	28.8984	30.7161
	lmo0533	hypothetical protein	lmo0533	+	985302	2.2	269	45.3394	36.8833	27.5447	20.1797	27.3402	19.3671	29.3273	21.0871	20.4115	17.9509	23.4983	19.3424	15.071	6.68771	12.8427	8.99178	10.916	7.28245	14.189	6.01287	42.9424	32.3349	22.0852	12.5996	9.53757	38.3121	30.2226	12.89	25.358	5.44919	29.1256	20.1097	20.8911	5.89649	33.4353	12.6957	0	13.5448	15.4683	5.11012
	lmo0534	hypothetical protein	lmo0534	+	985301	2.1.1	1355	53.8862	30.0725	29.5618	26.248	31.6849	31.3323	37.4702	38.2943	30.559	33.1547	40.516	26.4429	27.5437	20.7353	25.6158	21.0956	25.1588	22.0283	27.9283	21.2085	142.152	78.1802	84.6519	51.0118	66.4676	91.5421	79.2341	75.9711	112.765	71.611	115.262	73.2187	65.5158	42.2669	66.5747	44.9967	70.684	44.6928	57.7495	58.5064
	lmo0535	LacI family transcriptional regulator	lmo0535	-	985755	1.1	968	164.939	121.464	89.7207	96.9024	108.319	97.2029	93.2178	103.695	111.589	94.8618	188.151	129.48	76.1134	83.8552	87.6106	91.6667	76.2685	83.9729	82.1183	101.303	22.4351	9.00973	41.538	28.0859	26.5753	14.9453	36.4917	22.2682	37.6837	26.5711	14.2021	3.2019	16.0079	10.6794	22.1263	12.0275	22.2904	14.0181	20.4728	12.8149
	lmo0536	6-phospho-beta-glucosidase	lmo0536	+	985314	1.2	1322	12.2989	12.8481	16.5268	18.773	15.4748	22.9738	16.1267	23.8684	17.2425	24.0019	14.0706	12.6125	14.0055	19.4489	14.3249	18.191	15.7057	19.9216	16.5673	19.4147	20.8139	15.0833	36.0575	11.9997	20.1132	32.057	33.9233	12.6269	35.3632	23.9097	37.893	33.4185	120.444	59.5666	107.471	42.4917	113.262	54.1003	101.017	46.4082
	lmo0537	allantoate amidohydrolase	lmo0537	+	985309	1.2	1271	108.972	152.193	140.205	139.684	159.32	158.888	143.409	159.521	162.172	168.531	113.844	168.083	168.35	187.686	178.556	176.714	159.531	168.46	179.623	159.904	25.0666	9.80507	29.2994	13.3723	15.521	27.6497	31.0067	12.0388	23.3246	13.88	30.1388	12.1959	172.943	77.6	152.588	84.618	131.6	87.4846	128.872	70.5052
	lmo0538	N-acyl-L-amino acid amidohydrolase	lmo0538	+	985381	1.2	1181	99	128.192	141.946	169.716	186.723	187.078	159.228	218.765	189.511	212.564	135.607	200.117	188.115	226.037	194.327	223.122	189.569	209.035	204.511	225.99	17.1661	10.5516	18.9182	10.553	13.0718	18.3781	19.5603	11.7777	18.3427	6.84606	18.2959	8.53096	146.741	101.692	142.248	92.221	141.621	97.2399	136.918	100.387
	lmo0539	tagatose 1,6-diphosphate aldolase	lmo0539	-	985316	1.2	1016	317.972	282.533	229.109	314.976	200.515	385.5	276.62	383.85	208.665	322.536	358.405	291.952	4679.07	5356.8	4618.91	6123.32	5277.36	6549.1	5173.7	4544.32	25.6514	31.8853	165.639	79.1659	59.9263	102.731	96.2844	55.4384	80.7865	51.3574	22.2308	57.2021	37.4376	17.2198	46.6023	16.8527	31.8576	21.5758	28.7464	24.42
	lmo0540	penicillin-binding protein	lmo0540	+	985229	6	1193	847.084	794.211	706.771	929.539	705.67	879.623	684.426	914.216	711.105	810.777	1423.84	1247.9	546.866	814.317	612.721	663.613	489.061	766.525	518.737	868.019	16.9935	4.17824	17.4795	16.1453	7.18912	12.9953	14.8076	8.16151	27.7154	14.7867	9.05601	7.79559	20.0775	8.00026	18.9019	9.76101	9.04499	12.2516	20.1127	8.66666
	lmo0541	ABC transporter substrate-binding protein	lmo0541	-	986277	1.4	920	16.1812	18.6426	75.1782	105.256	76.7065	69.6933	89.3193	81.3376	69.8366	78.3928	11.5065	22.8199	66.4311	191.015	66.0816	179.192	62.8827	123.598	64.4405	149.643	44.0614	39.2714	63.1264	35.7058	28.8923	49.4188	51.6836	26.4518	43.3647	31.1509	64.0383	72.4287	85.742	38.0295	88.2169	34.2411	74.7538	60.1292	80.4906	49.4367
	lmo0542	PTS sorbitol transporter subunit IIA	lmo0542	-	984602	3.5.2	350	1.29974	1.4675	1.05941	1.41117	2.13596	0.931112	2.50661	1.35174	2.78249	0.952303	2.78087	2.54027	2.48424	2.38847	3.57688	3.15765	2.729	2.38378	4.11536	2.47783	28.9035	21.3197	8.49432	3.23068	4.89106	11.7883	19.3735	13.8815	6.50205	14.6709	28.0054	26.5183	44.1927	18.143	38.5792	17.5786	34.6145	26.792	20.8227	17.6889
	lmo0543	PTS sorbitol transporter subunit IIBC	lmo0543	-	984396	5.1	986	0.924439	0.434899	1.2056	0.501843	1.22704	0.2649	0.891407	0.74777	1.41359	0.564435	1.69533	0.516217	1.61966	1.76413	1.51431	1.44377	2.01565	1.73784	1.27262	1.05741	13.2156	10.1091	6.04155	4.59561	8.69687	15.7208	9.64552	7.05228	11.5614	7.45329	20.9146	8.64465	24.2883	8.87162	20.5795	12.5027	23.2517	14.8211	25.3887	13.2801
	lmo0544	PTS sorbitol transporter subunit IIC	lmo0544	-	986622	1.9	521	0.436983	0	0.569891	0	0.220961	0.125218	0.421369	0.201984	0.267283	0.106724	0.267128	0.244017	0.696015	0	0.687184	0.303321	0.564622	0.240433	0.240628	0.111075	22.2116	7.16784	31.4143	4.3447	9.86645	23.7799	15.6324	14.6679	10.9302	4.22782	11.2987	19.3172	32.4172	18.2994	21.6176	5.25339	23.2753	22.0187	32.0034	15.859
	lmo0545	lmo0545	lmo0545	-	984402	1.8	380	0	0	0.780795	0.371443	0.605468	0.171559	0	0.138367	1.2817	0.438659	0.182993	0.501483	0.190719	0	0.78458	0.415573	0.193394	0.109804	0.659359	0.152182	19.0198	32.735	15.651	14.8815	2.25297	10.8601	10.7088	7.30772	8.98512	1.93081	12.9001	6.10757	22.2071	2.08931	35.5414	10.7963	14.1729	5.48497	5.48089	5.43202
	lmo0546	NAD(P)-dependent oxidoreductase	lmo0546	-	985462	5.2	1250	1.03325	0.892116	1.01063	0.339376	1.38299	0.783742	1.17215	0.927091	1.67292	0.712514	1.0589	0.661829	1.62637	1.54649	1.43369	1.01252	1.17799	1.13701	1.50609	1.1587	2.31704	1.99393	10.7248	4.53224	4.11694	10.7494	6.52287	3.89482	6.38511	3.52825	7.07186	6.82036	6.76331	7.63574	11.7264	7.1242	18.3448	7.51717	19.1963	6.61742
	lmo0547	DeoR family transcriptional regulator	lmo0547	-	984998	1.8	947	53.9785	46.2751	25.967	37.1714	28.6529	34.8884	32.0961	41.7627	30.2444	37.5512	51.9226	44.6759	27.5173	29.2512	28.1898	28.5045	27.2814	31.2	28.0895	24.4647	3.05761	1.31562	12.5802	3.58851	1.81093	5.45583	10.0423	0.73424	13.2407	0.775992	4.14763	4.09104	13.3875	3.35876	21.4261	9.40124	8.54408	3.8577	6.60829	5.09395
	lmo0548	lmo0548	lmo0548	+	986247	5.2	665	0.228334	0.128902	0.781674	0.106246	0.346371	0.196288	0.110087	0.237467	0.314238	0.418241	0.732797	0.0956281	0.65463	0.677808	0.538604	0.079246	0.442541	0.251263	0.565801	0.609413	8.70454	3.74536	29.0988	3.40531	6.4443	10.8723	2.04207	2.09027	6.85351	4.41826	0	9.31725	19.0561	1.19523	13.5548	7.20566	12.1618	4.7067	14.1096	1.03584
	lmo0549	internalin	lmo0549	+	984412	2.1.1	2021	0.714474	0.849149	1.06664	0.524925	1.0553	0.743508	0.979027	0.599658	0.966026	0.523484	0.793061	0.692949	1.11404	0.956804	1.27139	0.965766	1.38475	1.05519	1.61514	0.831581	36.5552	26.5231	56.0323	44.3044	31.4145	48.089	61.8801	29.9492	42.8904	30.9245	35.9748	33.3741	69.7403	25.983	75.8991	23.7338	52.7434	31.7807	50.6048	28.6591
	lmo0550	pepdidoglycan-bound protein	lmo0550	+	985431	1.2	296	1.79207	0.289054	3.25529	1.42949	2.71849	1.32049	2.22176	0.887505	2.34885	1.31302	2.11274	1.71551	2.4466	1.9542	4.02593	1.59933	2.23282	1.97204	2.74899	2.14745	92.7165	151.176	80.3099	106.906	89.5953	90.5558	96.1629	96.0891	111.421	106.507	79.4334	70.5146	85.4636	72.366	121.583	48.4744	90.9067	56.2902	84.3726	41.8101
	lmo0551	lmo0551	lmo0551	+	984417	2.1.2	842	4.87057	2.54594	4.85218	3.10571	6.43067	3.95441	4.95746	5.25302	7.36503	3.23817	4.46607	2.94643	7.84391	5.89042	8.58124	7.19982	6.38063	6.99737	7.37555	6.46529	364.475	309.212	311.237	348.396	313.62	293.271	330.728	369.911	280.201	361.275	232.046	256.713	393.102	274.785	295.831	295.209	307.465	296.857	284.87	288.876
	lmo0552	hypothetical protein	lmo0552	+	986885	2.1.2	1031	4.64168	4.99122	4.39595	4.25108	4.8059	3.16686	5.3994	2.80957	6.28659	3.13097	7.1612	7.40562	7.11149	5.37405	7.82071	4.50043	8.21081	5.71587	7.30278	4.66322	108.136	174.029	196.456	185.698	187.979	104.244	208.22	175.364	122.736	158.248	94.2983	153.328	162.604	53.994	158.55	84.3673	126.886	106.817	142.655	70.8584
	lmo0553	lmo0553	lmo0553	-	984712	5.2	635	692.804	1013.72	608.18	919.323	572.083	917.563	687.877	890.897	610.298	886.713	892.333	1271.16	755.316	753.28	754.363	828.18	813.526	985.498	803.614	798.519	13.6727	1.96101	18.7516	7.13187	2.69931	19.5175	4.27679	4.37774	12.5594	9.25333	6.18232	15.8547	24.3894	7.50968	37.2598	7.54555	29.7162	7.39307	24.6252	14.101
	lmo0554	NADH-dependent butanol dehydrogenase	lmo0554	+	984446	5.2	1181	35.6374	17.286	26.9295	21.4914	25.2737	20.9032	29.3397	20.6946	26.7948	21.6806	36.5708	23.3847	313.832	187.41	288.152	219.193	276.966	214.026	285.646	135.584	15.9399	13.7171	34.0527	12.4717	13.798	22.7539	17.2591	12.3665	26.066	13.0697	26.6122	21.6555	27.4395	11.4488	31.5047	11.6001	26.2684	13.26	21.2002	8.75465
	lmo0555	di-tripeptide transporter	lmo0555	+	984577	2.2	1478	77.4231	48.8741	53.6033	48.5129	51.081	47.1116	54.778	52.7178	52.5447	52.7717	84.5224	49.1765	339.246	232.229	325.644	292.508	350.58	291.688	342.386	185.626	5.87954	8.43275	18.143	11.5007	15.0899	18.1846	14.7128	12.707	16.2024	12.4348	11.2987	7.86674	13.3483	10.2262	18.3114	10.1978	15.5168	9.18426	17.6489	7.9295
	lmo0556	phosphoglycerate mutase	lmo0556	+	984853	2.2	707	33.1848	25.2212	50.0007	32.5815	52.6205	35.1747	63.0661	37.0067	45.3249	25.9664	25.0127	29.4154	47.211	19.2191	36.9012	21.9908	33.6153	19.145	36.5469	14.9048	14.3293	21.1391	33.6893	28.8297	16.9736	40.9095	23.0511	20.6458	32.2347	25.976	11.1072	18.6246	11.9504	10.119	19.1261	2.90495	15.2538	9.59288	20.6463	8.76949
	lmo0557	phosphoglycerate mutase	lmo0557	+	984617	2.2	695	55.2784	61.7965	102.901	67.5066	82.2803	51.3709	97.0202	55.596	84.094	46.1046	55.3956	69.5447	73.1859	35.2093	67.0004	40.9483	59.3911	40.0321	61.3602	29.1572	74.9641	96.7659	246.317	151.522	175.13	166.459	209.083	172.015	167.232	152.201	33.8962	91.3853	119.539	37.7426	103.765	53.1906	85.3426	76.565	99.0105	69.3831
	lmo0558	hypothetical protein	lmo0558	-	984498	2.2	1040	807.9	912.589	933.528	1237.04	951.263	1421.31	981.802	1553.53	997.025	1457.71	841.936	1032.29	1015.9	1303.59	1023.47	1374.15	1039.85	1430.6	1145.01	1223.73	25.06	14.377	41.5291	19.6075	23.9126	45.7095	43.113	26.7458	38.3658	37.4533	29.2725	20.118	29.8014	16.8228	21.6799	19.0984	25.9359	14.5541	21.0627	11.2658
	lmo0559	hypothetical protein	lmo0559	+	985234	2.2	905	30.9679	61.4967	18.7158	12.34	15.5316	8.22462	9.87287	7.97167	17.4787	8.05516	38.7848	78.3802	11.6294	8.61272	14.7813	8.7963	7.97014	8.63489	10.606	9.72754	3.19935	1.37661	13.1634	5.00648	4.7372	6.8505	6.00449	6.9145	2.51901	2.43589	5.42488	5.13683	3.11291	0	3.73656	0.756697	2.98006	1.1533	5.7622	0.761442
	lmo0560	glutamate dehydrogenase	lmo0560	-	986813	2.2	1376	248.591	253.744	87.9271	117.522	104.452	145.253	101.858	167.227	97.0168	161.344	221.819	265.807	101.74	115.677	101.335	115.099	105.95	117.819	104.4	111.457	18.9452	26.2665	30.3131	13.9996	14.9609	30.0487	20.741	13.1427	30.6616	19.7667	18.5604	19.1521	21.5055	13.8741	25.4043	13.9404	21.5681	11.3822	21.231	14.5288
	lmo0561	phosphoribosyl-ATP pyrophosphatase	hisE	-	984508	2.2	311	52.1523	66.588	42.9062	55.5647	43.6228	71.6491	54.2837	61.673	48.9668	51.6029	68.1561	82.4682	47.0452	45.6794	46.9466	39.7525	48.8859	45.992	45.2913	47.5744	27.8713	7.9949	28.6683	14.538	5.50244	39.7856	26.1542	6.69288	18.287	11.7891	18.9036	2.48609	31.638	0	28.9344	10.9867	8.65362	16.745	26.7721	6.63333
	lmo0562	phosphoribosyl-AMP cyclohydrolase	hisI	-	984519	2.2	317	34.431	36.9852	32.7418	37.8276	36.0896	49.1258	35.9674	50.2311	34.8804	41.1691	42.7531	54.8761	33.1329	34.0695	36.0966	33.0276	30.3537	35.5206	32.7844	35.1899	22.7878	0	9.37581	0	2.69931	13.0116	21.3839	4.37774	7.17679	2.31333	3.09116	12.1959	4.43443	10.0129	28.3884	6.46761	16.9807	6.57161	22.9836	8.67756
	lmo0563	imidazole glycerol phosphate synthase subunit HisF	hisF	-	984515	2.2	755	28.3623	36.6789	25.0854	28.3601	29.522	40.6364	24.8273	40.2357	26.5756	37.1398	33.108	37.8255	27.297	27.3821	24.7523	24.6436	24.561	25.4554	25.4206	30.1411	13.4195	11.5482	13.8033	7.49979	11.3542	16.4195	21.5876	7.36571	25.6599	5.83841	14.3027	6.15604	11.1917	22.1118	17.9118	18.1367	24.9994	11.057	24.8598	6.38765
	lmo0564	1-(5-phosphoribosyl)-5-[(5-phosphoribosylamino)methylideneamino] imidazole-4-carboxamide isomerase	hisA	-	984608	3.7.2	722	26.9225	33.4847	25.2017	29.0674	26.7216	44.8417	23.9324	39.593	25.1834	37.448	28.5439	34.8832	24.8243	23.0125	26.3782	20.5855	22.9304	24.0712	23.4538	23.0161	26.0594	13.8003	18.5571	7.8421	15.4342	34.3378	18.8108	9.62738	33.1443	14.2448	24.4727	5.36418	19.5041	18.7171	29.6547	17.0681	28.0076	9.39386	31.771	13.3584
	lmo0565	imidazole glycerol phosphate synthase subunit HisH	hisH	-	984852	2.2	626	23.2835	28.7532	23.4855	30.3579	25.4782	40.0316	24.5563	36.5745	22.3635	29.4098	23.3513	28.0351	21.6717	20.5705	21.0725	17.5926	17.3925	17.6816	19.0315	22.1938	18.4919	23.8699	40.4191	9.0428	10.9522	31.3462	32.5363	8.88115	43.6788	3.51981	28.2198	21.0307	40.4828	29.2003	77.3891	15.3077	58.1325	19.1646	38.3007	25.3061
	lmo0566	imidazoleglycerol-phosphate dehydratase	hisB	-	985436	3.2	584	30.2841	37.1278	28.9855	35.4404	27.9974	45.1403	34.0898	38.6597	28.8584	31.0451	28.0073	35.1647	28.3203	27.8899	28.0019	19.4872	24.561	24.8151	23.1891	24.2827	54.5038	29.8476	61.1591	25.1993	27.879	42.438	53.4708	26.1766	31.2098	15.0901	62.1719	23.8665	50.6207	29.936	54.0108	26.9539	46.1527	17.8613	41.0505	21.2267
	lmo0567	histidinol dehydrogenase	hisD	-	985596	6	1283	22.5618	30.6221	16.7971	28.6016	23.1312	38.2818	23.069	34.8167	21.7324	27.0305	22.8057	26.5368	21.0522	20.341	21.8374	17.1405	21.9213	19.9076	22.402	18.1982	55.3084	17.4842	61.5342	22.0788	18.7186	46.7264	45.5458	11.3842	47.1019	14.3232	31.3883	19.3311	59.3053	29.138	65.9136	21.8912	67.288	24.4132	47.977	24.7148
	lmo0568	ATP phosphoribosyltransferase	hisG	-	985390	5.2	641	19.4233	28.0814	22.8209	31.0815	21.8287	38.8926	28.2081	25.4556	20.7544	23.95	16.3984	22.8167	23.0895	15.2683	20.3008	17.4282	22.1508	17.9201	21.8151	16.0758	42.8922	27.1976	71.9834	19.4294	22.7297	46.7264	38.1313	15.1789	53.3229	22.9171	38.2784	21.7475	68.0913	21.0786	59.7617	24.5608	67.288	23.5995	45.5375	21.4912
	lmo0569	ATP phosphoribosyltransferase	hisZ	-	984506	2.1.1	1181	32.421	44.7402	30.8934	45.1379	28.2499	47.7235	38.2719	43.8423	29.2736	37.3283	28.4898	38.0945	26.7418	24.2787	28.5774	23.3526	30.6078	27.2177	26.5137	21.4854	22.0706	14.7723	40.3588	23.0247	14.5242	19.2533	36.8194	15.8998	33.7892	5.60132	14.1377	13.7808	54.8789	19.5302	61.1	23.7802	35.4052	18.122	47.7005	14.0074
	lmo0570	histidinol-phosphatase	hisJ	+	984572	3.5.2	827	33.426	34.8373	33.1435	38.7129	30.2981	48.1547	37.1019	48.0063	30.6678	36.0633	30.9868	27.3829	26.0642	21.4962	25.8491	26.3252	24.65	24.0503	22.7551	21.6379	395.583	311.801	185.444	260.21	237.403	262.354	256.235	273.212	242.555	202.568	203.008	207.03	126.028	138.439	173.082	111.777	156.518	122.408	148.798	120.81
	lmo0571	methyltransferase	lmo0571	-	985060	1.8	296	28.6732	39.8894	14.774	25.9691	27.9616	33.2322	24.9331	33.7252	19.9652	34.3262	33.3343	31.0936	14.1903	23.8847	18.9219	20.969	20.0954	25.3547	16.9169	23.622	707.573	554.313	682.634	763.615	604.046	626.925	874.624	820.273	649.318	535.011	562.653	490.991	631.481	324.307	566.12	387.796	549.986	369.404	551.937	320.544
	lmo0572	lmo0572	lmo0572	+	986053	5.2	1031	54.5213	67.4646	64.2096	69.9371	54.1502	66.7575	70.9027	61.6062	58.7425	51.2292	57.5598	59.1832	55.5541	35.4312	50.1105	41.7824	44.4098	43.2542	51.1803	38.3733	36.5135	32.6303	15.8898	2.19761	1.66353	7.01645	2.63569	0.674477	5.52863	1.42566	34.2903	39.0837	13.6642	1.54269	4.3738	1.32862	2.61621	3.5437	8.09388	5.3478
	lmo0573	hypothetical protein	lmo0573	-	985853	5.2	1295	168.38	123.54	14.7479	8.2444	17.3546	11.9531	11.1448	10.4541	15.3409	10.4886	240.794	212.589	5.94319	11.6935	12.0862	10.5067	7.39105	11.1367	10.225	12.0347	16.7744	16.3599	6.90163	14.8746	10.5973	13.5689	14.6915	11.2787	12.3268	7.37911	40.9578	23.3416	15.2331	11.0559	32.2163	14.2826	18.7495	15.7217	18.5297	13.8399
	lmo0574	beta-glucosidase	lmo0574	+	984589	5.2	1394	16.7877	16.9852	24.8436	29.1156	23.5644	36.8288	29.0645	34.2382	21.7534	29.1128	27.6383	36.2498	41.3585	35.6421	41.3566	44.8328	47.4319	42.885	42.4095	34.9134	23.8954	24.1394	28.8533	8.94168	11.6912	30.4025	22.4232	9.97935	22.086	14.2382	22.5488	20.0171	31.3367	14.2657	40.4459	18.6749	34.8378	20.2236	35.9264	17.3085
	lmo0575	GntR family transcriptional regulator	lmo0575	+	986339	2.4	728	249.904	218.567	140.07	175.784	162.886	175.021	153.677	176.087	157.799	182.337	346.02	361.337	170.446	214.254	180.093	209.157	165.256	205.446	186	227.551	13.9165	13.6867	22.4942	13.9996	9.41982	17.0276	16.7903	3.81926	21.9143	11.1002	24.2713	20.2161	23.2123	3.27583	9.28758	13.1659	20.3698	11.4665	20.0515	9.46319
	lmo0576	hypothetical cell wall associated protein	lmo0576	+	985083	5.2	1463	25.0853	21.2863	11.4299	8.84499	10.2027	8.21515	9.91599	7.41794	9.72078	6.88761	26.4785	24.4922	7.29617	6.73959	8.37153	5.91227	7.65016	6.62964	7.5931	6.93082	37.6186	24.7056	60.0782	41.8267	30.489	48.7537	50.1646	21.3953	35.8545	19.0945	33.572	30.1999	54.9034	27.7304	61.6634	24.3507	33.1959	27.1214	37.0859	24.5034
	lmo0577	lmo0577	lmo0577	-	984939	1.1	458	90.1156	81.7342	64.001	72.1474	77.6483	78.3229	75.0753	86.7144	67.4811	86.0527	105.72	111.42	88.6532	85.5633	93.7804	88.538	86.365	96.7955	99.337	85.5192	6.31506	8.15166	6.49566	0	0	9.0146	8.889	0	2.48608	3.2054	2.14159	3.37979	6.14444	0	9.83391	1.49361	5.8822	0	2.27475	4.50893
	lmo0578	hypothetical protein	lmo0578	-	984630	1.6	752	42.9149	47.3138	43.1607	42.7567	45.4167	37.9337	45.2762	45.0866	42.0604	39.7292	42.3137	52.3547	66.1985	45.3904	60.3408	46.6099	54.3083	50.0024	61.1358	39.1162	13.473	6.62526	15.838	4.5178	10.2595	16.4849	16.2552	7.39506	4.54625	3.90778	14.3597	9.27085	16.8544	5.2857	23.9775	7.28358	16.135	12.4887	24.9588	0.916157
	lmo0579	hypothetical protein	lmo0579	+	986865	5.2	209	163.294	233.427	170.344	211.606	211.185	220.993	193.77	209.867	193.67	223.635	168.657	282.655	461.935	573.642	477.711	576.535	465.607	571.55	522.17	474.342	6.90146	0	14.1976	21.5994	4.08753	14.7775	12.9525	0	21.7354	7.0061	9.36179	3.69362	26.86	7.5812	16.1206	3.26461	6.42841	7.46348	29.8317	9.85523
	lmo0580	hypothetical protein	lmo0580	+	986638	5.2	656	128.114	141.644	145.232	158.86	153.789	161.868	150.989	171.955	161.183	169.758	142.837	210.55	461.311	447.494	430.052	525.047	455.333	482.093	488.571	369.862	2.20594	9.49166	20.4213	10.3559	13.0652	22.0426	26.9105	12.7134	17.3685	7.83787	8.97706	3.54183	27.9025	9.69286	13.7405	10.4348	12.3284	5.56637	17.4813	7.35017
	lmo0581	hypothetical protein	lmo0581	-	984637	1.8	1184	77.7675	78.1697	150.75	111.962	156.611	123.888	150.287	118.115	160.95	127.545	97.1967	89.0024	121.781	133.603	138.489	112.682	111.488	115.762	132.657	142.287	78.2747	55.7821	69.1911	31.5788	44.1867	62.8512	47.0555	34.0688	53.9259	44.0763	49.7716	64.8021	151.13	63.1447	128.557	61.325	109.364	82.8855	106.614	57.6344
	lmo0582	invasion associated secreted endopeptidase	iap	-	985140	6	1448	1603.24	1985.84	1723.62	2150.88	1736.29	2401.73	1872.83	2351.45	1947.48	2460.3	1750.66	2030.16	1699.4	2219.63	1841.95	2119.13	1747.44	2186	1785.56	2135.5	42.0089	42.176	67.9018	42.2597	23.6958	56.3973	35.6664	19.6953	60.6387	30.969	54.9497	47.1071	70.0695	35.7085	62.3018	18.9252	52.1726	31.3682	79.263	28.0898
	lmo0583, azi, div	preprotein translocase subunit SecA	lmo0583	+	984550	3.2	2330	108.719	82.0556	96.9276	97.3822	83.5991	91.218	103.86	87.3428	89.8123	71.4356	98.6733	80.2183	76.9034	60.7261	73.1988	64.4836	65.7174	58.8135	66.7376	52.1607	21.7613	22.4722	19.186	13.1348	11.4156	27.9575	26.8386	11.6458	21.0501	16.4107	21.5068	16.6379	31.4576	12.9768	32.4348	8.82326	28.3776	11.8788	19.7086	10.6543
	lmo0584	hypothetical protein	lmo0584	+	984661	5.2	1172	204.251	165.916	159.647	160.039	129.698	139.532	146.074	127.997	143.447	119.351	228.954	185.364	989.295	690.627	879.038	799.316	1039.92	874.69	924.979	552.577	11.12	10.6326	13.9798	9.66724	1.46357	12.3461	6.95661	7.71422	11.6738	4.39001	10.8942	10.5802	6.01087	4.07174	8.65811	5.84456	6.90519	6.23547	11.5716	1.17624
	lmo0585	secreted protein	lmo0585	+	984672	5.2	713	6.17652	4.44876	4.99971	2.6758	4.60397	5.21814	4.82627	5.98059	5.56915	5.61779	7.90945	5.88716	9.15932	8.9417	8.03832	9.31373	7.43023	8.14441	9.4118	7.06494	18.2686	8.73392	18.791	11.1173	15.6288	23.1804	24.7622	5.84924	25.5711	11.3334	12.3906	8.69088	21.725	17.8381	33.1894	10.562	15.1257	17.5611	35.0961	13.5268
	lmo0586	lmo0586	lmo0586	+	986388	5.2	1025	2.37146	1.67347	1.30475	0.965535	1.96733	1.08303	1.35775	1.18178	2.10779	0.81447	2.7861	2.60712	2.8329	1.00567	3.43793	1.95473	2.80082	1.54946	2.99941	1.69536	15.5384	7.29359	20.3417	6.63139	6.69303	20.1642	18.5577	6.78421	13.3463	5.01899	5.74847	9.07206	21.9906	6.98268	12.0983	5.34555	22.3678	9.16567	13.2295	9.41338
	lmo0587	secreted protein	lmo0587	+	986515	6	2465	2.37417	0.905139	2.3222	0.860826	2.15155	0.901208	2.2596	1.32543	1.83879	0.971418	3.02517	2.84092	4.65568	2.61511	4.70328	3.14612	4.3923	2.8501	4.86438	2.70391	5.87715	7.08064	9.67236	8.73698	3.13278	18.4569	15.4422	5.64525	16.6585	6.26457	9.96541	6.60538	14.8678	7.42441	22.4224	11.1203	16.9704	9.74549	21.1701	10.071
	lmo0588	DNA photolyase	lmo0588	+	984699	1.2	1403	22.4748	35.4647	57.1553	45.3085	69.1721	49.8145	61.1507	45.9215	61.4134	47.4167	21.3531	35.6999	63.348	45.6105	70.2176	49.545	70.7442	47.914	74.479	48.2764	9.29042	4.44161	15.9268	3.23068	2.44553	10.3148	18.4048	3.47038	13.8169	1.04792	6.30121	4.97219	24.1051	9.07152	21.7008	4.88296	20.1918	4.83744	17.848	7.86172
	lmo0589	lmo0589	lmo0589	+	985047	2.2	413	2.57123	2.69574	5.02991	1.36734	4.87555	0.947305	4.25033	0.636688	3.87561	0.807387	2.18929	1.07686	53.0061	11.5269	46.9327	11.2185	41.825	9.29674	33.6775	5.88216	7.00148	0	3.60085	0	2.07338	12.4931	6.57013	3.36261	5.51261	0	4.74874	1.87358	10.2185	0	10.9028	6.62384	22.8255	3.78582	7.56602	8.33172
	lmo0590	hypothetical protein	lmo0590	+	985311	2.2	1766	2.36668	2.5264	5.72406	2.16244	6.59281	1.88657	6.43142	1.99892	6.23782	1.60792	3.51167	3.09971	49.3473	14.8174	45.71	15.1733	44.2849	11.1987	39.7723	7.25176	19.685	9.88164	10.124	2.56699	3.40049	8.7812	10.7755	3.93922	17.4363	4.57954	12.795	10.9743	12.7688	5.40595	15.3269	7.37169	21.3916	4.73067	12.9997	5.07542
	lmo0591	hypothetical protein	lmo0591	+	984755	5.2	770	3.25442	2.56099	9.45309	3.67107	9.9484	2.28901	6.84684	2.52991	5.88127	2.23995	3.43628	5.2041	53.9089	14.3866	53.2715	17.3188	46.0639	14.4335	46.5938	8.5731	84.5898	35.5882	32.87	8.82465	12.2467	28.175	21.1676	14.4448	23.6806	16.2203	68.8474	57.3446	32.9218	12.3895	32.1993	5.33515	14.0074	10.1643	27.0846	13.4215
	lmo0592	lmo0592	lmo0592	+	986217	3.5.2	542	183.576	205.532	147.235	187.39	132.016	126.274	185.388	138.154	145.303	99.7235	189.645	243.142	322.639	171.732	279.217	223.358	312.916	191.765	280.247	117.778	2.66907	2.29688	8.23621	0	4.74244	5.71506	5.00927	0	4.20298	0	3.62058	5.71389	7.79088	1.46598	8.31264	0	4.97225	4.81071	7.69142	1.27047
	lmo0593	formate transporter	lmo0593	+	984793	2.5	800	555.407	433.425	198.601	137.545	189.068	130.157	155.698	134.197	172.791	133.119	800.609	734.125	175.355	148.3	195.925	142.652	163.556	169.901	177.905	148.391	1.80937	6.22824	0	1.41569	3.21491	1.29142	5.0937	3.47595	5.69843	0.918402	2.4544	3.87346	5.28146	0.99379	4.22637	1.71178	6.7414	1.95672	2.60702	0.861256
	lmo0594	homoserine O-acetyltransferase	metX	-	985447	5.2	1106	17.1714	12.098	19.0126	13.2315	16.9834	15.4701	14.8358	15.4296	16.1956	16.0537	15.9343	14.6132	18.445	17.5931	19.2803	15.0658	16.7734	16.0236	19.0057	15.4512	6.5461	1.12665	14.8133	7.17053	6.97871	8.40997	11.0571	5.65902	6.18488	6.64535	8.87975	9.10894	25.477	10.7863	15.2905	9.28953	13.4143	5.1914	14.1478	8.7246
	lmo0595	O-acetylhomoserine sulfhydrylase	lmo0595	-	984789	5.2	1277	22.1323	18.1371	14.8974	12.5131	14.5756	13.9116	14.8013	18.3563	14.7382	15.9108	18.3302	15.9968	14.783	15.4914	15.1568	14.041	11.4157	13.9451	13.5142	14.3819	20.4128	3.90361	12.8312	6.21109	10.0749	21.0447	15.9626	5.99113	17.8577	4.60495	16.9216	10.3179	22.0681	8.72016	22.0743	10.7287	25.3515	12.6727	21.2417	8.63682
	lmo0596	hypothetical protein	lmo0596	+	985266	1.8	527	57.4583	27.8034	26.1988	15.6798	23.5926	21.2928	25.6892	20.0687	19.5542	14.5605	68.1358	22.9181	1009.59	427.359	1008.87	698.806	1054.03	706.843	1024.61	334.6	5.48979	0	5.64679	0	3.25144	0	2.57579	0	6.48358	1.39326	1.86172	8.81433	29.3781	19.5991	8.54879	18.1779	23.0108	9.89476	15.8199	24.8247
	lmo0597	Crp/Fnr family transcriptional regulator	lmo0597	-	985531	3.5.2	701	73.8688	264.884	693.385	710.623	669.868	618.258	723.051	646.281	672.964	689.309	117.889	374.146	865.964	903.484	842.951	973.608	802.222	906.372	871.561	871.949	33.0326	19.5431	19.1122	11.3074	11.0049	11.7883	13.5614	3.96615	9.75308	7.33544	2.80054	3.31479	204.893	133.805	163.961	215.827	155.765	166.706	175.506	155.269
	lmo0597a	hypothetical protein	lmo0597a	-	16695798	6	548	15.7887	11.4153	14.4948	13.5333	13.0258	13.6919	12.2865	14.9799	13.3422	12.2785	19.5573	10.7887	2.64714	7.5178	5.4449	8.17143	4.42904	8.1537	4.00389	9.39951	26.399	11.3589	27.154	4.13103	6.25414	20.7262	19.8181	11.4108	27.0208	10.7197	14.3241	1.41286	254.289	168.195	236.376	290.96	258.19	204.6	237.73	196.028
	lmo0599	hypothetical protein	lmo0599	+	985146	5.2	332	17.125	21.9134	14.0701	4.67483	18.5309	4.31835	11.8894	4.27441	10.6841	3.51323	14.8653	18.7431	17.0204	9.102	13.6446	8.24158	11.7273	7.161	12.259	9.40237	0	22.4722	26.8604	17.0265	5.15544	15.5319	16.3365	6.27081	10.2803	6.62739	2.95192	6.98794	12.704	2.39047	13.5548	2.05876	16.2158	0	6.27093	4.14334
	lmo0600	lmo0600	lmo0600	+	985344	5.2	590	30.7485	26.0016	20.8892	9.81779	24.493	9.06912	14.6388	9.1877	22.5454	8.95503	21.1167	26.0788	26.8033	14.6218	26.8071	15.1814	20.8208	14.0159	26.0355	16.5801	39.2367	52.7582	70.6279	19.1873	52.2872	94.5161	52.9279	36.5108	69.5092	32.3632	21.6224	9.18719	33.4046	13.4691	30.55	9.2801	31.9789	15.912	19.4335	18.6766
	lmo0601	cell surface protein	lmo0601	+	984830	3.5.2	1100	51.6569	41.9498	31.6802	20.6303	38.0282	20.5413	27.5027	21.0201	36.3694	17.9121	33.2454	35.6331	33.989	19.2119	31.06	25.8856	26.9034	19.4168	29.6051	23.7507	26.3271	21.5231	71.762	27.8085	24.1688	67.6464	48.175	24.0239	71.5137	22.0492	15.1778	16.9081	37.1429	10.122	31.7726	7.47212	18.3919	12.812	30.3465	15.038
	lmo0602	transcripitonal regulator	lmo0602	+	984599	1.2	500	40.8252	34.0997	14.696	19.3495	21.5258	18.7873	18.5857	15.2576	20.8865	12.7877	84.0541	71.697	720.693	528.009	712.885	664.621	754.039	721.221	787.87	459.221	228.533	224.049	226.142	201.443	202.174	235.378	217.168	159.774	207.267	164.454	129.495	145.533	84.4401	69.9105	114.871	72.5251	118.56	78.2101	110.455	74.3568
	lmo0603	lmo0603	lmo0603	-	986186	1.2	386	157.178	202.311	258.28	207.16	332.315	238.993	250.078	208.692	275.619	222.551	201.054	282.566	229.258	183.634	245.01	181.518	207.531	213.717	245.049	226.232	3.74498	6.4455	7.70415	2.93015	4.43608	5.34587	7.02851	0	0	1.90088	0	0	87.4511	30.8537	72.8967	53.1447	62.7891	47.2494	80.9388	28.5216
	lmo0604	hypothetical protein	lmo0604	-	985855	4.1	344	201.217	526.789	410.656	551.722	304.736	642.083	314.525	556.822	393.29	590.362	243.718	502.122	372.166	341.696	367.374	331.047	301.994	399.436	330.949	394.609	4.20089	3.61509	8.64205	9.86059	0	2.99834	7.88416	6.05269	23.153	10.6614	0	11.2415	61.3108	11.5366	35.9793	19.8715	54.7812	18.1719	42.3697	17.9965
	lmo0605	hypothetical protein	lmo0605	-	985094	1.8	1340	28.18	16.3888	29.1715	21.0538	34.3616	23.8352	33.734	24.924	33.1377	22.2257	34.5222	20.1371	14.4136	16.1582	18.0559	12.791	14.7256	13.0716	18.874	15.7816	68.0882	22.3213	11.1167	7.61052	11.5219	15.4277	16.2269	10.9003	16.1678	13.1658	24.1899	11.5684	600.444	458.264	611.765	438.64	535.557	397.774	525.559	324.098
	lmo0606	MarR family transcriptional regulator	lmo0606	+	985290	2.1.1	461	35.7134	37.3499	58.2732	83.0127	39.8203	77.8143	72.5247	82.1576	53.6042	74.8825	32.8984	32.6713	73.9222	55.9739	67.8081	54.3772	65.7088	72.4421	71.64	45.3057	0	0	6.45348	4.90895	1.85797	6.71705	8.83128	4.51987	4.93987	3.18459	2.12768	1.67892	15.2614	0	14.6551	5.93565	5.844	4.52332	4.51996	2.98643
	lmo0607	ABC transporter ATP-binding protein	lmo0607	+	985501	3.5.2	1712	26.0552	24.4567	42.5906	49.4865	30.4682	46.6286	48.3224	54.7797	36.6112	43.9043	21.083	20.7461	64.0529	46.3053	57.0627	49.666	56.6065	57.8319	55.398	37.0633	11.8449	7.28082	16.5349	6.61978	7.51647	16.9083	14.2909	4.87608	11.3245	5.15335	12.0506	9.50898	29.6354	8.82924	17.1275	11.206	18.1256	11.5895	26.8189	6.44358
	lmo0608	ABC transporter ATP-binding protein	lmo0608	+	984780	2.1.1	1817	37.2229	36.5968	45.4488	48.3799	34.9578	56.7351	52.1858	60.1992	38.334	53.8098	37.0845	32.9302	78.3795	59.1678	71.1632	61.7773	76.196	70.9452	75.344	46.755	0	1.37206	6.55997	1.87123	2.36078	6.82789	8.22893	1.14861	10.6704	2.8325	5.40698	4.26656	8.53226	6.13001	17.3797	7.54199	10.3958	7.18431	11.4864	7.96875
	lmo0609	phage shock protein E	lmo0609	+	986403	5.2	299	148.015	685.075	1218.69	2275.64	2104.6	2423.92	1629.38	2483.01	2071.2	2931.26	211.95	1006.49	1492.76	1977.87	1616.39	2403.5	1463.59	2197.61	1689.22	2183.19	4.83102	0	4.96918	0	0	0	9.06678	2.3202	7.6074	2.45213	0	2.58554	4.7005	5.30684	22.5688	6.85567	8.99977	15.6733	24.3626	6.89866
	lmo0610	internalin	lmo0610	-	985509	6	1769	8.50562	6.4023	5.58831	4.99717	4.9851	5.98247	3.89374	5.09307	4.96603	4.72116	8.86276	6.33285	275.097	255.331	273.39	289.115	271.254	303.862	282.511	214.957	47.4914	128.948	544.925	468.322	429.676	452.927	391.869	405.445	384.883	354.105	66.0879	130.591	209.531	124.576	242.902	115.81	183.046	142.565	185.816	156.681
	lmo0611	azoreductase	acpD	-	985209	2.1.1	626	34.4401	109.947	290.722	373.888	346.853	368.937	323.208	390.969	348.137	440.258	48.2594	149.012	658.843	708.14	668.219	748.065	717.206	760.309	755.55	573.802	9.24597	9.94581	19.0208	3.61712	4.10709	14.8482	2.16909	3.33043	12.7397	4.69308	10.9744	8.65969	15.7433	2.53916	17.9975	3.28023	10.7653	1.66649	13.322	7.70186
	lmo0612	MarR family transcriptional evidence	lmo0612	+	984912	5.1	455	2.83464	4.51837	48.765	35.2248	43.3796	23.9382	52.5769	26.7057	40.6939	21.0133	2.29343	8.79904	79.8347	24.1832	60.3094	37.5	64.4727	27.615	61.4267	19.3271	12.7132	5.47019	42.4995	14.9206	15.0593	43.1011	26.8425	6.10579	37.5365	24.1987	8.62271	11.9071	12.3697	0	19.7972	13.5309	11.8418	10.3114	18.3177	4.53859
	lmo0613	oxidoreductase	lmo0613	+	987413	3.8	941	6.13446	9.75142	58.0281	42.8165	55.2219	40.6617	61.4099	40.4617	46.7294	34.8925	6.66118	11.8317	88.0144	31.7651	65.6239	50.1445	83.5388	40.5918	70.1377	27.4518	130.776	100.624	115.525	89.0803	68.3425	159.227	90.9566	47.2907	121.137	70.2841	79.3069	100.457	86.8245	27.0412	70.6773	33.4778	45.8587	29.3944	65.3955	39.5465
	lmo0614	hypothetical protein	lmo0614	+	985507	6	533	62.9354	83.5982	52.0874	34.3199	38.8792	31.0908	42.563	30.2091	40.6285	29.837	82.5155	96.1288	34.4269	21.3754	40.1925	24.4122	31.3222	27.1851	34.5775	22.8016	81.4217	112.108	231.709	67.9531	77.1579	158.844	89.1397	37.801	100.435	48.2161	125.175	177.211	235.025	52.174	207.092	47.5018	103.649	50.8746	136.868	59.4267
	lmo0615	lmo0615	lmo0615	-	984917	6	242	5.63223	16.9578	14.6905	6.98863	13.0531	7.26267	5.43098	6.29142	9.4737	5.04368	9.4682	19.6569	16.4466	3.71539	16.2379	7.16736	9.3999	6.88647	11.8888	6.44236	328.032	482.458	650.287	270.659	148.362	336.295	486.92	148.951	281.756	121.093	351.934	555.412	359.791	81.8957	306.49	115.672	316.658	146.198	313.663	96.5245
	lmo0616	glycerophosphoryl diester phosphodiesterase	lmo0616	+	985453	5.2	1751	35.457	35.1824	24.4082	22.1327	17.6765	17.908	21.6774	18.2948	20.546	16.1215	36.054	41.6228	18.7466	12.1468	18.0856	13.7969	17.2432	15.4495	15.5218	13.2046	11.5812	14.2375	45.9479	26.5369	19.1078	33.0638	32.6032	20.262	30.612	15.9557	10.6603	7.52639	21.7318	2.27176	23.1871	8.60872	15.4106	9.54234	20.8584	4.33135
	lmo0617	lmo0617	lmo0617	-	985148	6	494	131.026	221.126	174.734	349.368	159.381	247.195	215.363	267.636	211.115	250.975	61.4103	93.2809	86.9031	78.4286	81.4042	87.3233	82.4655	75.9797	76.7604	68.1719	111.26	57.9509	141.546	50.3986	48.5549	45.9745	74.1828	36.5607	64.5476	25.2644	67.5184	78.3496	56.9757	12.8651	63.831	31.8546	57.2712	30.6078	31.6397	26.4797
	lmo0618	protein kinase	lmo0618	-	984940	5.1	1142	52.4862	69.25	42.8136	47.8543	41.4241	47.7506	37.0761	50.6423	42.2349	52.9803	64.8406	78.8442	33.948	38.0838	35.2015	36.986	30.5563	41.0301	35.8801	36.3714	318.264	166.949	182.594	112.107	84.8618	174.667	152.303	74.2951	166.724	71.4401	163.401	150.653	125.84	55.0184	153.026	49.7831	112.202	54.8497	96.8291	47.681
	lmo0619	lmo0619	lmo0619	+	984942	5.2	455	21.8434	17.3204	22.9962	20.0176	20.3618	15.1943	19.9374	13.7575	16.8283	12.8279	13.4548	15.5031	16.2538	8.06108	12.8485	6.94445	13.4116	6.14686	11.7069	7.50196	3.1783	5.47019	0	2.48677	3.76483	4.53695	0	4.57934	0	0	4.31135	1.70101	3.09243	0	14.8479	0	8.88135	3.43713	9.15886	3.02573
	lmo0620	lmo0620	lmo0620	+	985155	6	392	92.8673	128.446	81.751	86.9645	80.8565	72.3495	77.0494	71.3635	84.1391	71.8698	77.881	81.1905	33.4661	27.2395	39.7045	24.4416	38.9977	28.4225	38.0339	36.5887	0	0	0	0	0	0	0	0	2.90359	0	0	11.8422	7.17633	0	2.87135	1.74445	3.43503	2.65874	2.65677	7.02154
	lmo0621	hypothetical protein	lmo0621	+	985249	5.2	740	22.4719	20.3906	17.7647	17.9526	22.1811	20.6413	19.4922	21.4855	21.559	19.9232	30.2028	34.7235	22.162	20.2778	18.3147	20.5128	16.1089	21.1717	19.8328	22.457	7.82351	11.782	8.04725	6.12128	9.26727	13.9599	5.50614	2.81806	4.61988	4.96383	9.28599	6.28066	9.51518	2.14852	6.09145	0	7.28726	2.82021	4.22717	2.79298
	lmo0622	hypothetical protein	lmo0622	+	985471	1.8	278	5.45054	14.462	44.5158	18.007	23.151	20.1481	26.2789	20.7848	23.5037	19.3686	7.74671	18.7184	63.8088	26.8125	36.2139	29.8885	42.2556	25.3411	40.7438	19.1193	0	13.4108	16.0296	0	6.15327	0	4.87462	4.98968	4.09	5.27341	0	13.9007	0	0	8.08918	0	9.67717	5.61767	3.74233	2.47264
	lmo0623	lmo0623	lmo0623	+	984945	5.1	266	45.2793	60.448	99.7181	76.3253	79.9183	69.0362	82.6546	77.9907	89.0954	69.898	33.424	70.8443	138.524	81.1542	100.313	111.683	113.698	92.9152	113.141	84.2574	0	0	22.3334	16.9883	3.21491	7.74851	5.0937	0	8.54764	16.5312	7.36321	5.81019	10.5629	0	4.22637	2.56767	10.1121	1.95672	15.6421	2.58377
	lmo0624	hypothetical protein	lmo0624	-	985292	5.2	443	459.122	562.272	306.696	374.358	319.138	444.446	331.583	470.186	317.852	431.75	464.174	546.658	248.596	258.245	236.312	278.867	250.589	294.355	243.295	306.491	32.642	30.8992	174.593	86.8354	71.5318	121.149	119.461	47.0311	118.223	61.3033	17.7115	29.6987	168.329	48.407	104.203	49.4102	100.335	55.3037	110.525	55.9351
	lmo0625	lmo0625	lmo0625	-	985881	3.5.2	701	348.115	467.033	232.965	364.887	248.839	426.077	269.774	441.643	247.244	381.715	330.228	405.9	176.898	196.497	170.328	213.893	173.502	231.763	183.849	233.329	33.0326	37.3095	163.516	137.304	97.8212	162.09	125.928	74.3654	162.551	80.6899	53.2102	70.7155	255.112	117.93	189.681	105.472	146.15	110.889	205.252	90.4098
	lmo0626	hypothetical protein	lmo0626	-	985506	1.2	1679	76.2161	53.9622	37.8494	28.8515	31.3413	27.235	33.2987	26.2647	31.0187	26.6611	149.11	117.558	141.392	76.9257	125.228	87.1462	125.217	95.0758	123.477	65.9537	9.4895	14.1053	76.3124	41.1738	27.5908	54.7999	57.4769	27.3452	65.2063	25.835	18.1385	19.3915	60.435	26.5342	53.7353	18.7715	40.1775	20.8355	60.9064	20.9424
	lmo0627	pepdidoglycan bound protein	lmo0627	+	984956	1.2	4748	5.21951	3.70584	6.53034	3.66539	6.4362	3.82632	6.34529	3.33024	7.28604	3.39021	4.84475	3.98303	5.90614	3.92445	6.31966	3.25624	5.86486	3.48848	5.34277	3.95577	10.071	6.82824	10.6729	6.68585	5.60325	8.93061	8.87777	4.8368	8.89052	4.49222	7.45159	5.06327	19.8947	5.19621	17.5836	4.04209	11.939	6.27064	12.532	5.66536
	lmo0628	lmo0628	lmo0628	+	984963	1.2	275	3.30587	2.17733	0.808378	0.512753	0.835809	0.710479	1.59387	0.764026	0.505514	0.60554	2.02088	0.692264	55.5511	39.4876	52.2036	59.0882	50.4569	43.0479	59.6182	31.5116	31.5066	76.8206	43.2102	41.0858	40.431	41.2271	24.638	32.7854	53.7479	39.9804	74.7926	14.0518	15.3277	20.1891	32.7084	29.8073	39.1294	13.2504	60.5281	19.9961
	lmo0629	lmo0629	lmo0629	+	984966	2.1.1	527	56.7383	74.6301	41.6927	45.029	45.5468	35.2817	41.6581	34.8457	46.243	40.4106	50.5737	70.6844	103.629	55.6947	88.6584	73.3692	84.5681	72.1026	88.8533	52.82	10.9796	9.44852	2.8234	2.14767	0	1.95914	0	0	4.32239	1.39326	3.72344	2.93811	8.01221	1.50762	6.4116	0	5.1135	0	3.95496	1.30656
	lmo0630	transcriptional antiterminator BglG	lmo0630	+	984967	5.2	2030	0.112312	0.126808	0.512649	0.1742	0.369138	0.160916	0.613693	0.129783	0.377829	0.137148	0.377609	0.250865	0.679771	0.349274	0.853651	0.389792	0.94326	0.494361	0.587531	0.256933	4.28155	5.52676	13.212	1.11666	1.26792	4.58387	2.00889	2.74174	3.93292	2.17323	4.35593	8.78395	16.6635	3.1355	16.1126	2.02531	12.6289	5.91639	12.3381	2.71735
	lmo0631	PTS fructose transporter subunit IIA	lmo0631	+	984965	5.2	452	0.503544	0.379024	0	0.312406	0	0	0.647402	0.23275	0.307995	0	0.461724	0.281185	0.962436	0.427077	1.18778	0.349522	0.975935	0.0923517	0.83184	0.255988	0	5.50642	9.87254	0	0	6.8505	6.00449	3.07311	2.51901	3.24786	2.16995	1.71228	12.4516	1.75723	7.47312	3.02679	2.98006	2.30659	20.7439	4.56865
	lmo0632	PTS fructose transporter subunit IIC	lmo0632	+	984378	3.6	1061	0.214788	0.242511	0.490203	0.133258	0.488736	0.184644	0.414227	0.496401	0.394129	0.367202	0.656501	0.179911	0.615796	0.789409	1.23848	0.347876	1.17948	0.472716	1.59671	0.43677	4.09408	3.52318	21.0558	2.13553	4.84961	9.74036	17.9287	1.96627	16.1174	6.92693	10.1816	4.38227	31.8678	11.2433	44.6276	9.03761	21.6096	14.2663	31.461	11.6926
	lmo0633	PTS fructose transporter subunit IIB	lmo0633	+	984968	6	308	0.492136	0.555657	1.20341	0.228997	2.23964	0.423068	1.89821	0.511823	1.58034	0.360581	1.35379	0.412222	2.8219	0.834804	3.86958	1.53722	1.43074	0.676947	2.43899	0.187642	0	0	4.82444	7.3396	0	3.34766	4.40135	0	7.38582	4.76142	3.18119	0	9.12718	2.57614	3.65191	0	0	3.38151	3.379	0
	lmo0634	tagatose 6-phosphate kinase	lmo0634	+	987068	3.5.2	1268	1.3781	1.15006	0.761875	0.724885	1.31793	0.360558	1.44441	0.623142	1.04449	0.439005	1.53835	0.803005	2.69126	0.711458	3.43917	1.08134	2.55481	0.989015	2.62302	0.776739	10.2788	2.94847	11.7475	2.68077	6.08781	12.2273	7.50207	2.19404	13.4883	1.7391	6.97155	5.50114	17.7797	5.01829	15.117	5.94266	22.3398	8.64563	15.6329	4.89267
	lmo0635	lmo0635	lmo0635	+	984974	2.1.1	704	99.2231	107.281	64.0327	69.5555	68.2233	57.4833	69.7823	54.0638	87.3743	57.1321	86.1368	86.0018	33.0853	39.8823	41.6375	35.5595	29.8913	31.332	33.05	40.7102	2.05575	3.53817	16.9163	6.43386	0	4.40181	5.78731	2.96196	4.85579	4.17384	18.126	6.60137	32.0034	5.64557	22.4088	6.80705	13.4039	8.89265	19.2531	2.9356
	lmo0636	hypothetical protein	lmo0636	+	984970	1.2	416	22.7923	19.1462	13.7327	11.0297	12.7235	8.62116	14.945	9.73446	13.0488	10.1533	37.4517	26.8804	18.8194	14.3824	15.1971	8.73302	16.6096	9.22986	16.7176	8.20358	17.3778	5.9818	7.1499	0	10.2923	19.8451	16.3072	3.33842	10.9459	0	33.002	20.4611	16.9083	5.7268	40.5914	11.5083	29.1359	8.77003	30.0463	11.5805
	lmo0637	hypothetical protein	lmo0637	+	984971	5.2	593	14.4646	11.5622	7.6374	5.59885	6.9904	5.61207	9.01049	6.74504	7.63377	4.78316	23.5922	17.2623	10.031	8.90247	11.2726	7.10812	9.67556	6.76126	10.3616	7.6137	46.3583	33.5947	25.0969	24.8175	15.8959	48.7608	20.6063	14.0618	34.5791	16.0999	87.7077	67.903	40.3578	36.183	45.5936	21.9289	29.5447	27.2656	52.7328	29.0348
	lmo0638	lmo0638	lmo0638	+	984973	2.1.1	629	0	0	0	0	0	0	0	0	0	0	0	0	0	0	0	0	0	0	0	0	0	0	0	0	0	0	0	0	0	0	0	0	0	0	0	0	0	0	0	0
	lmo0639	transcripitonal regulator	lmo0639	+	984972	5.2	533	14.5236	12.7005	12.3951	6.75797	12.4197	9.66996	13.8673	7.40418	12.0187	8.34603	18.2788	29.101	12.9271	6.76285	11.7555	7.61029	11.8666	7.12924	10.7025	7.49196	0	0	0	0	3.21491	3.87425	2.54685	0	2.13691	1.3776	9.20401	2.9051	2.64073	1.49069	4.22637	1.28383	5.05605	1.95672	3.91053	1.29188
	lmo0640	oxidoreductase	lmo0640	+	987093	1.2	917	200.607	225.564	164.62	231.858	183.064	222.651	202.703	237.862	184.813	219.44	335.007	415.015	459.176	386.721	421.947	440.62	466.82	497.376	444.622	387.11	3.15753	0	6.49566	2.47052	0	7.88778	2.963	0	4.97216	2.40405	5.35397	3.37979	12.2889	4.33565	6.14619	3.73403	5.8822	2.27644	4.5495	4.50893
	lmo0641	heavy metal-transporting ATPase	lmo0641	+	985323	5.2	1880	275.885	166.404	36.4144	20.5396	45.1003	24.568	32.9757	23.5983	36.4196	24.1972	306.125	198.277	36.2354	18.7192	42.6218	15.6285	34.2758	22.1965	39.3318	17.5393	9.24597	3.97832	15.0581	4.21998	4.56343	14.8482	6.50726	5.55072	11.5264	5.08417	7.83882	2.88656	14.2439	5.50151	11.3984	6.19598	13.636	6.66594	10.5466	3.66755
	lmo0642	lmo0642	lmo0642	+	984976	6	728	95.3307	84.7891	31.8295	24.8485	35.1246	20.1741	29.4681	20.1036	35.8852	23.3843	95.8297	74.6088	101.072	59.6232	98.5755	71.022	91.9776	63.8147	91.0614	50.1868	21.8688	11.9759	22.4942	7.77756	12.9523	22.7034	9.32797	9.54815	15.6531	12.1093	5.39363	2.12801	9.67181	4.36777	15.4793	11.2851	9.25902	10.0332	8.5935	5.67791
	lmo0643	transaldolase	lmo0643	+	984977	5.2	650	1.51837	2.10996	1.94209	0.869554	1.94894	1.10446	0.788368	1.37665	1.28592	0.77018	1.28517	1.36964	2.23238	1.08967	1.37753	1.29715	1.35821	1.221	1.25415	1.15784	60.1095	38.3166	141.976	144.577	145.041	93.7498	110.723	116.545	64.8557	89.2712	31.7093	36.9362	90.9774	33.0149	55.4687	58.9735	51.842	56.1767	70.5697	45.5672
	lmo0644	hypothetical protein	lmo0644	-	984979	3.5.2	1820	835.76	814.033	517.287	575.561	459.529	540.824	487.339	550.482	492.502	503.315	818.075	865.091	432.073	470.544	450.505	483.724	413.289	548.224	442.18	444.459	11.9383	6.84901	22.1034	8.09532	9.42758	17.6097	19.4182	12.9962	10.0262	6.46361	16.1942	10.2229	39.4935	18.3597	27.266	15.4356	17.0506	16.3532	33.8289	17.8054
	lmo0645	amino acid transporter	lmo0645	+	984978	1.2	1391	38.9461	20.9072	19.8215	14.64	21.5437	17.0454	23.544	18.2922	19.0439	17.6094	49.4354	28.1382	19.3144	17.9289	19.327	18.5026	17.1504	19.7155	18.5434	15.5783	116.611	57.3427	25.7026	8.96095	9.86645	40.8717	32.2418	20.0017	35.2498	11.6265	104.513	88.5992	53.691	42.8893	69.7169	22.6552	65.9466	26.6476	52.5056	26.7621
	lmo0646	hypothetical protein	lmo0646	+	984982	3.5.2	839	5.52159	4.29245	9.82756	7.7499	11.0536	9.10428	11.7833	10.2298	10.0489	8.75438	10.5411	8.1885	18.512	16.506	18.0778	17.09	20.6137	17.1326	19.8879	13.667	184.614	86.1165	31.9447	28.3492	23.5033	61.573	30.7623	29.0025	35.3201	36.782	160.321	91.4172	171.232	99.5032	198.821	108.548	110.89	100.757	161.589	110.05
	lmo0647	lmo0647	lmo0647	-	985414	5.2	284	62.6956	91.8735	67.586	91.8638	71.8355	58.9423	54.7957	63.4463	41.1222	64.3105	134.548	193.3	821.485	213.378	613.583	377.037	403.318	426.133	522.705	237.621	462.761	638.919	972.913	970.835	484.91	820.281	801.695	437.174	732.713	549.794	334.561	495.334	3379.41	1695.4	3892.13	2364.61	2889.4	2333.58	3333.83	1817.86
	lmo0648	hypothetical protein	lmo0648	+	987051	5.2	950	24.5455	40.8031	56.8533	48.3638	42.207	46.3253	48.8017	38.4158	43.7198	39.6588	25.0729	46.8119	147.926	92.8338	143.899	106.777	112.113	106.678	119.664	85.6001	214.881	167.868	161.459	124.009	102.897	98.9829	132.999	110.521	98.3922	80.4485	295.62	166.388	8441.62	3215.91	8058.09	4105.47	6771.12	4976.67	6881.69	2832.73
	lmo0649	transcriptional regulator	lmo0649	+	986557	6	641	46.4264	66.0582	71.4747	73.7358	58.6589	72.491	63.1542	63.5569	62.5892	59.5278	42.4621	76.2871	180.075	146.556	171.626	153.154	141.857	158.088	159.945	126.258	6.77246	1.94269	13.9323	5.29891	5.34817	9.66753	14.8289	2.16841	15.9969	3.43757	9.18681	2.41639	17.572	2.47983	21.0924	5.33931	14.7192	5.69642	21.1424	4.29823
	lmo0650	hypothetical protein	lmo0650	+	984986	3.8	2690	66.9369	78.99	93.4125	96.8972	85.724	100.147	88.1672	99.9502	88.3482	89.1852	68.1918	87.9708	246.074	230.491	232.253	236.863	219.133	239.041	230.398	183.769	69.4762	38.9317	70.9091	31.1831	25.5186	53.0475	42.9586	21.2103	44.1009	17.7691	52.2361	38.9128	55.0225	29.8769	49.9013	21.4001	40.1327	28.7334	38.8001	28.9687
	lmo0651	transcriptional regulator	lmo0651	+	984985	5.2	647	96.9213	125.329	215.193	204.854	185.205	188.628	191.668	189.068	185.383	191.287	133.308	197.847	320.035	210.384	296.803	240.432	268.807	258.63	290.371	207.587	49.2048	30.7952	23.0054	13.9996	6.62331	23.945	20.9879	9.6675	19.3707	2.27049	31.8561	22.7431	28.29	11.0559	24.3799	12.6957	29.1659	24.1872	33.8369	10.6461
	lmo0652	hypothetical protein	lmo0652	-	984987	6	536	145.698	126.296	55.6742	59.4278	60.7852	78.6316	65.2628	67.9343	60.5374	55.191	151.256	137.813	118.4	105.68	130.814	149.095	141.192	158.85	128.649	122.873	24.29	18.5803	44.4172	31.6751	39.9619	38.5261	20.261	20.7392	25.4997	34.2477	21.9662	20.2221	42.0156	28.1648	60.94	17.8733	57.8197	26.2681	46.6642	26.978
	lmo0653	lmo0653	lmo0653	-	985279	5.2	920	1215.41	1081.08	467.946	572.226	498.185	714.533	501.764	717.099	489.084	637.97	1470.11	1145.01	1188.66	1280.74	1308.65	1350.28	1435.34	1542.96	1395.19	1118.08	47.2087	32.5004	37.2284	44.3245	31.6883	37.0641	53.1603	34.0094	50.7986	39.1383	40.5576	37.0565	19.9044	28.5221	50.2346	28.2862	36.644	30.6319	37.4111	35.2049
	lmo0654	lmo0654	lmo0654	+	984989	3.5.2	209	573.522	887.924	478.452	1065.11	700.288	1231.96	728.294	1142.97	810.555	1114.46	651.388	1161.25	3240.47	4954.87	3925.31	4969.16	3726.61	5438.79	4129.51	4275.43	0	5.93907	14.1976	10.7997	16.3501	9.85167	19.4288	6.62914	16.3016	17.5152	9.36179	11.0809	6.715	26.5342	21.4941	22.8522	51.4272	22.3904	54.6915	13.1403
	lmo0655	phosphoprotein phosphatase	lmo0655	+	984992	4.4	707	29.963	29.2226	15.0212	11.3935	15.4766	12.4635	19.2616	16.0089	16.2578	12.039	17.3316	18.5308	133.833	92.1786	130.97	104.139	111.982	96.1385	137.228	71.7395	20.4704	40.5165	77.9066	44.8462	50.9209	87.6632	63.3907	42.2748	74.1399	34.2883	20.826	33.9626	39.8347	23.6109	52.5968	30.9861	40.0413	15.4962	35.3936	26.3085
	lmo0656	hypothetical protein	lmo0656	-	985077	5.2	563	173.506	480.998	393.216	333.099	410.853	315.579	311.213	286.489	341.507	354.31	211.015	542.706	425.419	376.527	462.168	422.971	384.354	478.51	461.899	377.598	7.70907	13.2681	29.075	8.04232	6.08781	16.5068	14.4683	7.40489	22.2557	14.3476	17.4289	11.0023	92.5098	31.0507	108.042	38.8974	105.316	33.3474	53.6865	28.1328
	lmo0657	lmo0657	lmo0657	+	985003	2.5	416	90.2575	81.3198	88.9952	73.3052	90.4477	87.9358	87.2083	97.471	98.2006	82.2954	60.6918	60.7865	66.565	61.7049	67.5269	58.853	63.6113	64.91	78.9191	59.2327	31.28	14.9545	7.1499	5.43869	10.2923	2.48064	19.5686	6.67683	10.9459	8.82062	23.5729	11.1606	20.2899	7.63574	13.5305	11.5083	19.424	6.26431	32.5502	4.96307
	lmo0658	hypothetical protein	lmo0658	+	985006	5.2	635	62.8844	58.1775	64.6651	54.0713	72.1792	71.2222	69.2834	62.5816	63.7281	63.6808	50.8652	48.5674	49.3566	44.3106	52.2649	42.2389	45.6465	46.1767	55.0028	47.8619	47.8544	23.5322	23.4395	21.3956	4.04897	30.9027	29.9375	17.5109	25.1188	13.88	44.8218	21.9527	19.9549	16.271	26.6142	8.62349	31.8388	11.5003	16.4168	8.67756
	lmo0659	transcriptional regulator	lmo0659	-	984988	2.1.1	896	1.44102	3.15832	2.98478	1.26216	1.41445	1.38452	2.04343	1.05788	1.24434	0.931601	4.19721	5.96412	1.94419	0.575149	1.7329	0.470705	1.56073	1.11934	0.770171	1.1635	17.773	6.95209	36.5625	29.0761	20.0959	20.7577	43.9694	17.0717	16.5378	18.8626	9.86276	6.91782	48.7343	15.9738	31.4504	18.3429	28.5946	19.2203	23.2801	4.61449
	lmo0660	transposase	lmo0660	+	985017	6	284	6.93653	7.22939	8.3504	12.6623	8.70121	10.0913	10.033	8.50883	8.8119	9.96911	8.31752	8.49178	11.7282	8.59848	12.3765	8.70371	12.6683	9.54139	11.0182	6.71362	0	13.1285	20.9229	35.8095	30.1186	14.5183	14.316	19.5385	16.0156	10.3248	3.44908	16.3297	34.6352	2.79307	3.95944	12.0275	18.9469	5.4994	7.32709	2.42058
	lmo0661	hypothetical protein	lmo0661	-	984999	5.2	308	29.7743	170.031	46.2109	100.758	45.5394	173.035	69.2845	155.082	46.0557	127.826	22.5632	59.1539	50.3239	48.2099	47.0154	68.8332	66.0525	80.0151	50.8123	56.4801	9.38062	8.07252	9.64889	14.6792	13.8897	13.3906	17.6054	11.2631	11.0787	4.76142	6.36238	2.51023	4.56359	15.4568	32.8672	6.65599	17.4753	20.2891	27.032	8.93031
	lmo0662	phosphomethylpyrimidine kinase	thiD	-	985000	1.2	815	493.296	448.077	491.886	516.478	453.663	565.047	555.817	581.704	473.793	500.227	465.572	569.839	599.388	529.739	608.034	568.526	631.363	590.821	614.57	471.453	7.10444	3.05687	9.13452	4.169	3.15581	15.2121	6.66675	0.853015	22.3747	0.90152	3.61393	2.85169	12.0969	5.85313	9.68025	7.5614	9.92621	6.40249	8.95683	3.3817
	lmo0663	hypothetical protein	lmo0663	-	985001	1.2	866	241.874	234.377	331.966	306.953	275.383	342.954	354.583	353.762	298.515	298.532	197.581	266.874	400.783	259.442	365.606	312.71	352.098	313.017	353.788	241.956	10.0298	4.31559	15.4749	6.53961	2.97018	11.9311	9.41189	4.01419	14.4777	5.09093	6.80269	3.5786	13.0118	4.59069	18.2216	6.32588	12.4564	4.21811	9.63424	5.56985
	lmo0664	acetyl transferase	lmo0664	+	987123	2.1.1	563	151.261	159.216	169.708	171.63	223.832	201.307	207.085	229.005	205.448	233.704	137.586	163.399	240.667	185.462	245.394	223.744	247.047	192.339	261.349	173.019	15.4181	13.2681	2.64318	6.03174	4.56586	14.6727	9.64552	6.17074	12.1395	6.52163	6.97155	8.25171	12.5013	7.05697	14.0055	9.72436	9.57422	4.63159	18.5126	4.89267
	lmo0665	lmo0665	lmo0665	+	985007	5.2	263	80.9313	70.5653	100.57	66.4714	121.895	94.5798	111.366	88.6617	97.771	98.3361	62.0617	75.268	127.162	81.8321	121.608	86.1638	121.131	83.8291	135.837	72.2569	10.9796	0	11.2936	4.29533	0	15.6731	0	0	0	5.57303	3.72344	0	0	3.01525	4.2744	5.19369	0	0	3.95496	2.61313
	lmo0666	hypothetical protein	lmo0666	+	987139	6	377	92.5295	105.381	140.872	83.1148	168.74	119.661	146.83	120.498	137.676	131.168	90.3783	112.55	171.664	98.0977	192.799	114.073	169.393	113.221	204.694	93.4143	38.3414	26.3959	19.719	11.9997	9.0834	13.6829	21.5876	14.7314	24.1505	11.6768	7.8015	6.15604	14.9222	0	8.95588	7.25468	14.2853	6.91063	11.0488	7.30017
	lmo0667	ABC transporter ATP-binding protein	lmo0667	+	985013	5.2	935	70.9173	73.1917	153.827	86.4844	161.737	105.099	148.203	110.617	146.379	97.3135	69.1245	108.461	159.845	111.339	164.664	121.739	146.973	136.188	170.228	94.2195	68.1298	86.6114	87.5977	70.2672	44.9366	80.6764	85.7276	50.5685	65.8333	44.0127	45.1587	48.8932	69.3022	25.5136	42.196	23.4382	34.6145	29.5828	56.8906	23.5852
	lmo0668	ABC transporter permease	lmo0668	+	987144	6	770	160.65	203.766	328.157	286.344	319.546	280.192	333.213	272.067	326.275	246.322	236.561	356.522	403.846	354.813	402.289	349.662	428.432	394.804	437.917	317.806	16.918	8.08823	7.73413	7.35388	6.68001	8.05001	7.05586	2.7084	10.3603	4.77069	8.92467	6.03627	25.6058	6.19475	14.6361	2.66758	14.0074	9.48665	13.5423	8.05291
	lmo0669	oxidoreductase	lmo0669	+	987147	6	884	5.84224	4.65622	4.70595	4.31755	3.58406	4.13603	4.05943	2.74013	3.94129	2.76975	4.64803	4.89357	204.691	96.1864	196.986	122.254	235.869	113.215	200.121	66.1707	9.8258	7.04635	18.5291	2.56264	1.93984	17.5326	15.3674	4.71905	6.44695	6.64985	4.44289	3.50581	17.5273	2.69839	12.7507	6.19722	7.62692	4.72265	9.43829	4.67706
	lmo0670	lmo0670	lmo0670	+	985009	6	176	7.73238	5.82027	7.56313	4.79728	2.93241	6.2779	4.5565	4.16977	8.67085	7.55386	9.84751	7.91606	251.655	156.303	267.85	208.726	283.076	172.068	262.57	121.531	24.5645	7.04635	16.8447	0	4.84961	23.3769	23.0511	3.93254	0	0	5.55361	8.76453	23.9008	0	6.37537	3.87326	7.62692	0	11.7979	3.89755
	lmo0671	lmo0671	lmo0671	+	985011	1.5	608	39.9527	36.2285	25.7672	31.139	25.9471	25.6519	28.7735	25.3634	22.7954	17.9296	31.1395	35.8704	24.102	10.6952	21.5972	14.2994	19.3585	12.3651	20.419	9.23511	38.077	38.9111	29.3744	24.2062	16.9139	56.0526	24.5652	17.1443	37.4749	20.5351	25.8256	25.4733	37.0483	10.4568	35.2059	12.383	17.7335	11.1523	27.4315	22.6557
	lmo0672	hypothetical protein	lmo0672	+	985014	1.5	428	11.3432	6.80388	6.2409	4.7833	9.14129	3.96146	7.69072	4.66964	6.99235	3.50621	12.0264	8.01671	7.45271	3.00646	5.15628	1.59933	4.29389	3.60817	8.05179	3.91948	40.54	49.423	31.2745	18.503	34.0151	28.935	19.0212	48.6755	23.9394	41.1547	13.7481	18.0807	3.28706	11.1332	15.7824	7.99029	25.1742	15.8316	9.7353	9.64848
	lmo0673	lmo0673	lmo0673	-	987146	1.5	209	155.691	266.132	252.506	183.976	203.77	144.423	167.934	125.519	187.358	144.58	227.421	410.031	146.02	89.3628	149.178	102.288	106.665	129.49	119.327	101.329	0	0	0	0	4.08753	0	0	0	0	0	0	0	0	0	0	0	0	0	9.94391	0
	lmo0674	lmo0674	mogR	-	985015	1.5	920	453.073	633.474	275.923	366.476	323.733	280.902	308.319	269.027	335.398	248.304	413.705	584.328	157.872	136.819	190.26	153.634	144.326	152.987	144.429	143.914	4.72087	1.35419	1.61862	0	0.93201	2.24631	1.47667	1.51153	4.95596	3.19496	2.13461	5.05317	4.59332	3.45722	4.90094	0.744373	4.39728	1.70177	4.53468	1.49808
	lmo0675	lmo0675	fliN	+	987142	1.5	314	125.76	126.457	68.7044	62.4484	73.782	37.5584	67.9648	42.1742	64.2243	45.4521	120.849	165.994	25.8361	15.1497	26.0017	12.9012	18.4793	9.82798	16.5483	16.5661	23.0049	3.95938	33.1278	17.9995	10.9001	22.9872	12.9525	8.83886	18.1129	2.33537	37.4472	12.3121	290.983	98.5556	272.259	115.349	201.423	134.343	215.451	118.263
	lmo0676	flagellar biosynthesis protein FliP	fliP	+	985021	1.5	767	102.073	65.9517	45.9975	46.5283	61.6507	23.9158	44.5828	31.5758	52.8657	34.8911	122.101	138.904	15.5168	15.7023	22.3415	13.8817	13.7196	12.1475	14.1472	13.1364	75.4847	55.2148	36.8806	25.1008	31.2951	47.1418	42.5006	33.5341	41.603	22.9888	103.675	33.3292	1033.74	727.617	1137.26	712.347	794.511	674.142	870.092	626.988
	lmo0677	flagellar biosynthesis protein FliQ	fliQ	+	985022	1.5	272	296.62	202.201	140.841	148.259	181.674	109.898	153.082	127.836	152.299	129.173	179.026	202.729	25.286	31.89	32.6299	31.8987	18.6232	24.6721	21.3948	31.0083	148.647	109.644	38.2244	107.997	116.337	68.2039	59.781	112.185	50.1587	129.343	154.83	53.9837	1291.35	1594.97	1760.86	1715.17	1275.79	1502.26	1262.11	1364.57
	lmo0678	flagellar biosynthesis protein FliR	fliR	+	985024	1.5	761	150.673	97.6786	89.0107	71.2242	86.3548	61.0751	82.94	66.8312	84.3173	61.0467	90.3986	105.479	19.4533	20.1421	22.2036	17.8697	15.3748	16.4706	14.918	20.3163	11.4119	3.2735	21.5201	0	2.25297	13.5751	1.7848	4.56732	10.4826	1.93081	6.45006	7.12549	11.1035	3.13396	11.8471	6.29786	23.0309	9.5987	19.1831	2.71601
	lmo0679	flagellar biosynthesis protein FlhB	flhB	+	986322	6	1046	176.762	122.665	121.82	126.651	133.739	89.2747	132.211	107.601	115.868	98.9153	98.2878	100.247	23.2497	24.6375	28.1509	22.1294	20.9719	17.1017	19.555	25.0864	13.8425	3.57365	18.5098	4.33225	5.73894	13.8319	23.3814	3.32407	20.7078	4.2157	10.3275	5.18589	10.7748	11.4044	23.7113	8.51229	21.9192	11.9758	28.92	11.2013
	lmo0680	flagellar biosynthesis protein FlhA	flhA	+	986323	1.5	2075	39.6291	24.6878	36.863	29.4151	43.2531	23.7716	43.3694	24.0734	34.8468	21.0119	22.3334	20.1864	10.7456	7.51746	9.64739	6.71163	8.9087	5.8642	8.50092	5.75344	2.09437	1.20155	16.5161	2.73114	3.30783	10.4638	5.89603	2.01173	9.89402	2.12613	7.10252	2.61543	23.0949	4.98475	25.004	9.24657	23.4098	5.53649	15.0883	4.65228
	lmo0681	flagellar biosynthesis regulator FlhF	flhF	+	985019	1.5	1223	38.7009	16.272	36.3347	24.9163	42.405	20.0258	44.2066	22.6549	37.7872	20.2084	16.063	11.7074	12.6449	6.63853	11.7714	8.23575	8.18701	5.19524	9.18456	4.83177	4.73629	0	12.1794	5.55866	2.80517	10.9865	10.0001	2.84338	7.45823	4.20709	5.62167	3.16855	8.06458	9.10487	21.2044	5.04093	8.8233	5.54883	13.6485	2.25447
	lmo0682	flagellar basal body rod protein FlgG	flgG	+	985030	6	779	43.184	17.9402	54.3479	30.8441	60.7022	32.0954	66.8324	33.6583	47.6699	27.2121	18.0558	16.6569	21.1471	11.0788	18.0888	14.6831	15.02	10.7806	13.8491	11.0016	3.71617	4.79694	15.2898	0	1.10049	13.2619	5.23084	1.78477	11.7037	3.77251	5.04097	1.98887	12.6552	10.2055	20.2541	7.03146	12.1151	4.68859	10.7088	6.19111
	lmo0683	chemotaxis protein CheR	cheR	+	985031	5.2	788	58.6887	41.8908	100.386	85.4679	96.118	57.3282	113.183	66.4819	97.1701	64.8182	32.0767	28.575	30.2997	18.5538	27.733	21.8068	20.8255	15.6419	25.233	17.6369	3.67378	7.9037	13.2259	5.74889	2.17587	14.4217	8.61862	3.52882	17.3553	1.86474	1.24587	6.88166	33.958	5.04452	14.3022	2.60672	22.2428	6.62159	11.91	6.12049
	lmo0684	lmo0684	lmo0684	+	985027	1.5	335	53.8582	43.4355	113.327	77.7096	87.536	60.5007	109.323	65.1127	87.824	62.0102	37.9727	34.1187	37.6295	19.0011	35.5863	23.2474	22.8067	21.7892	27.2898	17.0838	4.31341	0	8.87353	0	0	9.23594	0	0	10.1885	4.37881	2.92556	0	25.1812	2.36912	20.1507	0	12.0533	0	3.10747	4.10635
	lmo0685	flagellar motor protein MotA	motA	+	985036	1.5	851	59.4359	35.4681	90.432	68.9328	92.0567	69.2	107.998	78.7673	86.3005	62.0523	34.6147	29.6016	32.1529	25.5835	31.0152	25.2119	24.4746	22.8818	27.0529	22.5936	6.80425	0	3.49942	1.33095	2.01498	8.4988	11.1739	2.45092	8.03598	1.72685	1.15374	0	4.96531	1.86861	11.9201	2.41397	11.0913	3.06598	6.12741	6.47762
	lmo0686	flagellar motor rotation MotB	motB	+	986861	3.5.2	827	80.2592	46.2423	145.508	104.773	142.296	109.177	165.232	121.862	131.602	102.269	48.6695	41.1513	51.6019	43.5376	48.7378	40.0933	34.7948	38.1469	44.069	34.0325	15.7533	4.51886	14.4034	1.36953	2.07338	13.7424	6.57013	0	19.2941	3.55382	13.059	5.62073	23.8431	8.65246	16.3542	9.93575	13.0431	10.0955	21.437	3.33269
	lmo0687	lmo0687	lmo0687	+	985029	1.3	500	89.5423	74.5395	228.011	200.981	182.567	165.563	266.492	168.15	189.371	148.448	63.1797	55.9339	81.6563	64.3599	73.6274	62.3642	60.8878	61.7927	69.9493	56.4768	20.2498	12.4472	11.9022	6.79023	3.42667	10.3236	10.8584	5.55736	13.666	5.87337	13.7344	7.74113	33.776	6.3555	24.7761	8.21038	24.2509	4.1712	16.6724	4.13094
	lmo0688	hypothetical protein	gmaR	+	986281	1.5	1913	131.174	104.328	348.773	340.38	290.885	285.908	375.44	304.05	300.293	280.761	91.1392	76.8985	124.485	115.062	115.884	117.413	97.8592	107.998	106.445	106.269	18.1731	9.12271	16.3562	5.9246	2.69085	18.9158	16.3429	4.36401	13.1162	6.5339	14.3802	14.5892	22.8394	6.65434	21.8142	8.59645	16.9275	10.0995	24.5481	6.48777
	lmo0689	chemotaxis protein CheV	cheV	+	987162	6	908	203.262	168.676	470.769	597.45	463.523	528.881	572.995	601.006	483.645	558.384	135.913	98.6503	186.496	225.391	169.621	227.078	161.227	211.8	164.023	214.001	30.2935	20.5809	16.3999	6.23745	1.88863	19.3457	16.4579	4.59445	16.3195	9.71142	16.2209	15.3596	24.8211	7.00573	18.6211	8.29619	16.3362	11.4949	31.0132	13.6607
	lmo0690	flagellin	flaA	+	987167	6	863	7287.75	11492.4	3647.01	5600.52	4293.6	6823.96	3708.43	6578.43	3478.19	6195.51	1631	2536.84	828.318	933.07	895.529	992.333	896.734	1139.43	929.048	1064.73	15.0969	11.5482	29.3319	15.7496	8.94147	21.5505	15.7409	11.2787	14.528	13.623	17.0658	12.5686	44.0672	6.44928	44.4062	17.4566	35.9366	13.9076	32.6285	19.9614
	lmo0691	chemotaxis response regulator CheY	cheY	+	985049	1.5	359	756.549	704.2	220.633	184.959	258.718	204.263	200.607	209.407	231.18	225.16	302.315	306.765	81.9488	83.1186	92.9989	81.3658	68.9756	74.8388	78.3305	68.4501	16.1034	10.3934	28.9869	0	4.76878	20.1138	7.55565	3.867	12.679	0	5.46105	4.30923	19.5854	13.2671	34.4801	1.90435	22.4994	10.1586	29.0031	7.66518
	lmo0692	two-component sensor histidine kinase CheA	cheA	+	985032	1.5	1856	720.388	524.294	199.363	196.352	238.789	194.825	210.755	198.38	229.23	200.969	250.648	247.174	80.1768	74.5595	85.8303	77.7031	73.0483	68.7793	79.0376	70.5017	9.36546	5.37299	17.661	3.66387	6.47137	17.2683	18.3093	4.87279	5.53042	3.96144	8.99882	6.26544	34.931	9.43057	28.5604	10.7062	18.174	10.1281	15.7432	11.1449
	lmo0693	flagellar motor switch protein FliY	fliY	+	985035	1.5	299	587.751	482.185	211.709	241.055	221.071	189.338	229.486	202.261	239.28	200.555	175.463	181.724	77.7504	72.4422	84.0976	74.5927	59.9289	66.2393	69.0843	58.5611	9.66204	0	14.9075	7.55978	5.72254	17.2404	9.06678	6.9606	11.4111	2.45213	22.9364	12.9277	28.203	23.8808	60.1835	11.4261	22.4994	5.22443	17.4018	13.7973
	lmo0694	lmo0694	lmo0694	+	985033	1.5	410	425.87	439.898	170.275	207.459	164.453	165.875	184.098	172.648	177.033	168.078	153.012	185.951	65.9456	70.7649	65.6035	64.335	53.0662	57.6126	60.359	51.6329	10.5789	0	21.7628	0	2.08852	17.618	3.30905	1.69358	8.32927	1.78988	9.5668	11.3235	20.5861	1.9368	21.9648	3.33609	13.1383	0	2.54041	3.35701
	lmo0695	lmo0695	lmo0695	+	985037	1.5	1046	241.613	264.107	113.367	138.411	129.773	121.426	132.421	139.523	129.994	141.004	81.0408	102.862	46.3606	45.4562	48.479	51.3664	37.5805	42.4347	40.6096	40.4817	11.074	3.57365	5.69533	2.16613	1.6397	11.8559	3.8969	3.32407	14.1685	2.81047	9.38862	8.14926	14.8153	7.60292	9.70006	3.27396	15.4724	7.48486	10.9696	7.90678
	lmo0696	flagellar basal body rod modification protein	flgD	+	985038	1.8	422	189.099	200.923	102.502	100.703	113.297	92.8695	114.397	91.2279	110.001	101.805	77.9616	88.0796	40.3689	39.9433	47.6301	42.1723	36.5803	37.187	38.6029	34.9532	6.85251	11.7939	0	0	0	0	6.43034	0	2.69766	3.4782	9.2954	16.5034	13.3347	13.173	8.00313	6.4829	12.7656	6.17545	14.8101	4.89267
	lmo0697	flagellar hook protein FlgE	flgE	+	985043	6	1235	301.864	252.546	151.088	135.967	180.245	135.805	167.161	147.448	164.186	151.173	129.287	132.478	82.1879	73.3062	84.7921	73.1033	70.464	67.4239	78.3525	66.0029	9.38062	5.04533	16.8856	5.5047	2.77793	13.3906	16.5051	2.81578	24.0039	5.95178	41.3555	25.7299	41.0723	27.6935	38.3451	21.0773	29.4895	25.3613	35.4795	34.0468
	lmo0698	flagellar motor switch protein	lmo0698	+	985039	6	236	371.513	354.625	248.53	240.345	254.287	215.398	274.402	225.997	232.242	233.182	153.856	171.717	125.092	112.923	145.048	100.434	105.084	96.7332	112.888	87.5835	24.4609	0	6.2901	9.56935	3.62186	8.72933	5.73847	2.93696	14.4444	3.10397	8.29526	0	0	0	14.2841	2.89269	17.0882	15.4308	30.8387	2.91083
	lmo0699	flagellar motor switch protein FliM	fliM	+	987173	6	992	224.047	190.026	156.83	143.586	159.887	124.146	164.8	133.732	153.572	132.738	92.7499	113.844	85.2502	59.0983	74.7162	62.2385	61.0687	58.7296	69.0021	54.4195	11.6762	2.51199	16.5139	3.42588	6.05103	12.5006	4.10881	2.1029	10.3424	3.70413	11.879	2.34339	24.1415	6.4131	20.4551	8.9752	16.3138	8.94414	22.0809	7.64202
	lmo0700	flagellar motor switch protein FliY	lmo0700	+	985046	1.5	1547	281.153	248.175	205.144	198.567	194.099	167.844	214.934	174.636	191.707	157.952	118.858	135.564	95.524	85.0683	97.2085	85.7128	79.7758	77.644	90.1082	73.3006	16.8524	11.2796	16.3713	5.8603	6.09961	17.3741	11.4213	2.24826	14.743	6.17786	18.4152	8.01717	27.3285	13.3699	38.6352	12.8433	23.5459	11.8123	24.2816	8.46735
	lmo0701	lmo0701	lmo0701	+	985048	1.5	1403	199.782	155.127	162.037	140.209	141.63	132.311	175.776	136.338	146.677	121.141	80.9432	96.2129	73.1815	59.5739	69.7492	58.4917	60.6154	52.9497	61.5067	45.7573	16.5163	6.21826	21.2358	5.65368	3.6683	19.156	20.3421	3.96615	15.4424	7.33544	18.2035	13.8116	26.1139	9.07152	31.3456	6.83614	19.2303	13.396	27.5157	12.2839
	lmo0702	lmo0702	lmo0702	+	985034	1.5	1166	98.2527	82.3179	68.3166	54.6313	67.505	52.0896	75.8313	52.4016	63.7831	45.6371	43.7321	49.9901	34.931	21.3304	34.2214	24.0146	30.3067	22.8356	29.0071	18.4328	17.3867	12.8247	17.8839	2.91508	5.14882	9.75037	6.99238	3.57871	20.5341	5.04295	10.1078	9.30527	26.5838	10.2317	23.207	7.04953	20.8221	7.16289	24.1568	5.91145
	lmo0703	lmo0703	lmo0703	+	985050	1.5	464	185.755	257.547	112.276	83.9989	91.9012	48.9176	86.2475	44.8951	85.8134	45.2866	85.7636	151.071	51.568	13.8685	45.2566	23.6081	34.0685	23.1219	36.1967	19.5765	6.23357	0	0	0	1.84598	2.22457	5.84954	0	4.908	1.58202	4.22791	5.00426	6.06516	5.13565	4.85351	0	8.70945	1.12353	2.2454	2.96717
	lmo0704	lmo0704	lmo0704	+	985042	6	428	305.204	286.764	102.802	103.583	103.512	92.0277	108.696	90.4435	100.657	88.9537	114.738	120.399	44.8856	36.2279	43.3406	36.7845	38.1297	33.0587	41.1373	30.5449	0	0	3.47495	2.64328	2.00089	9.645	12.6808	0	10.6397	5.14434	13.7481	9.04034	23.0094	5.56661	36.8256	3.19612	3.14677	1.21782	14.6029	1.60808
	lmo0705	flagellar hook-associated protein FlgK	flgK	+	985054	1.5	1520	270.797	245.242	126.103	138.635	136.916	129.138	136.755	138.57	137.595	130.209	103.503	121.012	56.6597	52.5745	56.7584	58.3644	46.0701	52.0672	51.614	45.2871	20.963	3.27996	20.5824	3.7277	10.1584	21.7631	15.2007	8.2374	16.5052	6.28752	20.0346	12.2392	26.8865	14.1306	29.6763	10.3669	24.8514	11.6785	26.7721	9.97834
	lmo0706	flagellar hook-associated protein FlgL	flgL	+	985052	1.5	875	331.308	344.18	188.219	220.519	204.218	199.674	223.386	222.847	202.912	207.322	123.682	169.327	82.2861	81.7886	84.6272	88.6258	68.6363	81.0918	72.9128	70.7557	6.61783	9.96625	34.0355	9.06139	7.8391	34.2447	31.0506	3.97294	15.6316	8.39772	24.6869	8.85458	30.5854	10.9045	47.6625	7.82611	27.739	23.8559	44.1006	15.7504
	lmo0707	flagellar capping protein FliD	fliD	+	985041	1.5	1289	236.475	276.913	147.127	169.769	143.551	145.22	164.369	164.365	156.502	157.671	93.6631	124.414	65.5102	63.9887	68.8223	75.6482	53.0061	61.3585	57.692	55.2395	8.98794	8.70143	25.4237	3.51618	7.98494	14.4338	17.9227	6.47498	16.807	6.2729	19.0502	7.21545	47.005	11.7244	41.9885	10.6289	36.627	16.1998	23.4722	10.6956
	lmo0708	flagellar protein	lmo0708	+	985045	1.5	386	111.007	167.705	131.83	88.6785	100.589	70.431	106.283	64.0242	99.6842	62.6195	52.6056	89.8548	46.0017	31.6611	45.727	27.5481	30.2729	30.7009	36.0271	25.32	3.74498	3.22275	3.85208	0	2.21804	5.34587	3.51426	1.7986	5.89721	0	5.08004	4.00858	3.6438	0	8.7476	1.77149	0	9.44988	8.09388	3.5652
	lmo0709	lmo0709	lmo0709	+	985079	1.5	281	189.279	274.595	162.719	152.059	155.629	130.728	163.016	119.269	155.107	128.211	88.263	162.383	76.7867	55.57	82.4694	58.2053	58.0059	66.9069	64.3629	47.4953	0	0	15.8591	0	0	7.33635	4.82276	0	4.04649	0	0	5.50114	15.0016	2.82279	8.00313	0	4.78711	1.85264	7.40504	2.44633
	lmo0710	flagellar basal-body rod protein FlgB	flgB	+	985059	6	401	224.322	247.296	153.552	176.9	160.388	157.231	169.799	166.677	165.378	164.635	102.499	129.912	79.3519	69.7824	69.303	78.9042	68.0011	69.2052	69.8342	61.5871	7.21048	3.1025	22.25	2.82081	0	25.732	13.5325	1.73149	11.3543	7.3198	29.3429	5.78851	42.094	11.881	19.6495	6.82156	30.2231	12.9961	15.5837	12.0126
	lmo0711	flagellar basal body rod protein FlgC	flgC	+	984818	1.5	410	186.665	181.097	145.665	151.333	149.299	145.359	153.059	158.282	142.747	148.695	80.0682	111.881	65.7688	58.6831	66.1853	68.059	52.7076	59.3431	54.8579	51.0687	10.5789	24.2765	25.39	2.75905	4.17704	27.6854	13.2362	3.38715	19.435	1.78988	9.5668	13.2108	34.3102	25.1784	38.4384	6.67219	19.7075	13.9827	30.485	18.4636
	lmo0712	flagellar hook-basal body protein FliE	fliE	+	985062	4.3	296	225.545	285.007	172.28	200.606	203.11	198.513	194.528	199.689	181.331	214.21	116.201	130.164	82.695	76.2138	89.9794	89.9178	71.9465	79.1631	73.1655	65.9854	4.87982	0	10.0387	0	0	17.4146	4.57918	9.37454	11.5264	2.4769	9.92918	2.61165	4.74798	2.68022	15.1979	9.23323	18.1813	12.3135	7.03105	6.96835
	lmo0713	flagellar MS-ring protein FliF	fliF	+	985064	6	1652	109.384	124.541	89.5328	102.737	94.1991	86.3217	92.1246	93.1571	97.7834	93.4562	61.0739	94.0106	50.3329	44.865	45.535	47.0626	39.0926	42.1896	43.1991	35.6727	12.2748	8.29961	27.9573	8.23207	7.7893	23.7799	13.9869	8.00069	17.2582	5.3404	15.4614	11.7311	38.3888	18.781	36.8638	16.5896	33.4837	14.8547	29.6873	15.859
	lmo0714	flagellar motor switch protein FliG	fliG	+	985067	5.2	1106	96.6408	95.9306	101.781	106.491	102.161	99.3746	112.858	100.435	108.391	103.77	58.1948	94.1805	61.6363	50.2743	53.3582	53.5883	47.0587	48.5244	49.0744	45.3584	27.4936	5.63326	33.6665	12.2923	3.10165	25.2299	23.3427	10.6893	24.7395	2.65814	24.8633	15.4151	45.8585	17.258	55.0459	23.5335	37.8039	17.9339	36.7844	17.4492
	lmo0715	lmo0715	fliH	+	985068	5.2	692	135.393	127.72	146.273	164.596	145.55	145.159	161.237	157.012	153.414	142.048	88.8356	115.889	95.3124	87.2876	78.8506	80.4995	71.5566	77.5734	76.9416	63.587	14.6395	5.39915	21.5116	9.8179	0	14.9268	15.7001	6.02649	21.4061	4.24612	19.8584	4.47712	26.453	12.6353	40.7085	9.89274	27.272	9.04664	36.1597	5.97287
	lmo0716	flagellum-specific ATP synthase	fliI	+	985071	1.8	1301	136.478	119.345	167.191	175.432	159.68	162.707	185.773	183.54	172.42	174.959	87.8734	101.647	88.458	80.8336	79.8052	87.0307	69.8348	78.883	82.195	75.1263	15.5839	6.7054	21.7545	10.4513	4.61495	29.3961	11.4902	9.62295	11.3936	5.65008	19.6296	6.5532	22.7443	11.6164	26.0009	8.95134	20.7368	10.8341	27.2656	12.7164
	lmo0717	transglycosylase	lmo0717	+	987208	2.1.1	668	145.478	124.475	153.966	182.135	172.237	177.04	186.309	196.451	171.847	184.866	86.0823	94.4377	95.5819	91.383	87.0412	90.8031	78.4191	90.3618	84.8651	70.4615	4.33275	1.86428	13.37	3.39004	1.28308	12.3698	6.09873	1.04045	3.41139	2.19922	8.81604	3.4783	4.21569	2.37975	10.1205	3.07429	10.0894	5.46652	7.80352	7.21833
	lmo0718	lmo0718	lmo0718	+	985076	1.5	644	230.817	237.05	267.043	308.82	274.674	265.814	315.78	277.974	295.051	271.639	163.113	175.76	158.171	129.077	160.817	129.94	141.769	144.964	151.119	113.715	0	0	4.62249	0	0	4.81128	2.10855	1.07916	5.30749	0	1.52401	0	4.37256	0	5.24856	1.06289	2.09297	1.61998	1.61878	1.06956
	lmo0719	hypothetical protein	lmo0719	+	985078	5.2	326	52.7828	72.7222	43.4398	61.4551	46.9126	49.9725	57.8474	53.8463	45.6539	50.7691	44.3481	56.2872	57.5534	41.2175	55.2143	71.9844	54.0794	56.2922	58.7707	51.2434	4.43213	30.5126	45.5888	41.6135	39.3753	63.2676	58.2271	19.1576	24.4274	35.9946	48.0973	7.11616	90.56	12.1716	62.116	37.7376	53.6683	30.356	38.316	42.1937
	lmo0720	lmo0720	lmo0720	+	985065	1.8	323	38.9562	49.5486	27.5447	39.7479	28.1234	24.0072	33.7173	33.3554	34.2345	28.8865	29.4805	38.9206	39.0232	27.4674	38.7495	41.0494	34.7948	36.154	36.4418	21.1166	17.8927	3.8494	27.6065	38.4989	21.1946	47.8901	20.9879	23.6317	38.7414	34.0574	21.2374	16.7581	34.8185	27.0256	27.8627	25.3914	29.1659	20.9622	32.2256	8.51687
	lmo0721	fibronectin-binding protein	lmo0721	-	987135	6	647	760.233	1021.71	556.518	819.417	512.273	847.614	645.495	790.279	570.252	721.905	929.175	958.863	415.575	509.739	431.781	438.675	409.692	522.231	437.592	610.772	20.1292	0	18.4044	5.24985	2.64932	12.7707	6.29638	5.37083	10.5658	7.94673	3.03391	2.39402	13.0569	9.82748	20.8971	5.28987	10.4164	3.22496	11.279	2.12922
	lmo0722	pyruvate oxidase	lmo0722	+	986726	2.1.1	1730	18.9758	11.1589	5.84311	7.19454	6.46339	10.1577	6.94638	9.71518	6.56905	7.59532	23.3207	17.5134	577.03	577.976	557.441	725.962	604.917	672.725	607.939	469.31	101.309	41.0691	66.3131	39.9607	33.2245	65.7347	61.2833	49.4601	67.8997	38.2482	44.2941	21.9569	45.6201	26.2123	64.5382	26.9316	36.6542	24.1453	51.8738	26.3034
	lmo0723	metyl-accepting chemotaxis protein	lmo0723	+	986712	2.5	1805	801.568	1131.91	116.498	184.227	140.122	201.521	127.596	203.982	132.569	181.967	119.868	181.438	299.588	221.425	280.95	238.055	274.782	249.553	280.914	161.776	31.2973	16.5741	42.0977	20.0924	12.3576	30.9297	40.665	15.802	42.3335	16.2932	42.9989	20.1861	39.0407	16.3084	36.2401	15.1842	26.9096	15.3319	25.4379	15.2794
	lmo0724	hypothetical protein	lmo0724	+	986702	6	728	830.024	1087.77	204.545	288.378	248.641	301.446	204.064	317.681	225.646	308.429	160.29	236.582	278.097	209.743	265.301	238.767	263.501	236.034	269.738	176.25	25.845	17.1084	20.4493	23.3327	14.1297	38.3121	20.5215	16.2318	31.3062	13.1184	37.7554	25.5362	27.0811	10.9194	27.8627	10.3446	16.6662	7.88323	14.3225	8.51687
	lmo0725	peptidoglycan-binding protein	lmo0725	-	986516	6	212	104.236	164.04	99.5101	169.425	106.677	157.119	112.215	147.263	154.26	141.759	192.468	214.985	63.1119	105.664	78.5906	77.8039	65.3808	99.187	87.2768	110.246	238.149	117.108	0	21.2952	16.1198	19.4258	12.7701	6.53577	5.35732	13.8148	9.22994	3.6416	66.2042	29.8977	37.0849	16.0931	25.3515	4.90557	34.3135	22.6717
	lmo0726	hypothetical protein	lmo0726	+	986355	6	143	0	0	0	0	0	0	0	0	0	0	0	0	0	0	0	0	0	0	0	0	0	8.66114	0	0	0	0	0	0	0	0	0	0	0	0	0	0	0	0	0	9.58148
	lmo0727	glucosamine--fructose-6-phosphate aminotransferase	lmo0727	+	986353	1.8	1805	401.9	412.465	197.745	193.199	209.128	193.197	185.65	200.596	230.064	200.876	856.333	702.899	237.304	365.471	303.129	280.021	220.601	293.658	266.83	334.917	16.8524	5.52472	33.0178	10.0462	4.27765	22.3381	24.8508	5.78123	28.433	9.77595	17.9616	12.4552	28.1093	7.05228	36.2401	11.0086	22.4247	11.8606	29.4848	12.6055
	lmo0728	riboflavin kinase / FAD synthase	lmo0728	+	986299	3.5.2	740	31.2965	53.8728	74.5715	76.585	91.3705	88.8281	85.3895	94.4082	86.9893	88.6394	37.1654	69.7907	140.621	122.45	138.207	135.185	137.721	129.627	154.171	114.319	7.82351	1.68314	28.1654	4.59096	3.47523	19.5438	14.6831	5.63611	16.9396	4.96383	7.95942	4.1871	24.7395	7.51981	27.4115	8.32673	9.10908	8.46062	19.7268	7.44795
	lmo0729	lmo0729	lmo0729	+	986278	3.5.2	479	86.1731	140.578	96.9918	176.605	136.608	159.053	122.655	170.015	138.504	163.879	89.9102	132.684	64.792	98.7482	77.845	92.6911	68.4639	85.0652	76.0189	86.8511	6.03877	5.19669	15.5287	11.8122	1.78829	6.46516	11.3335	2.90025	9.50925	1.53258	8.19157	11.3117	23.5025	4.97516	9.40367	1.42826	14.0621	2.17685	10.8762	7.18611
	lmo0730	lmo0730	lmo0730	+	986268	2.1.1	338	78.0537	149.919	114.518	166.359	129.632	148.853	128.037	151.466	138.081	134.262	93.9888	185.617	86.8109	91.1211	91.0002	93.2564	87.8111	84.6579	82.9975	88.7678	4.27524	0	4.3975	0	2.5321	0	0	0	0	0	0	4.57617	0	2.34816	0	0	0	0	3.07997	0
	lmo0731	lmo0731	lmo0731	+	986215	2.1.1	404	279.359	211.973	307.215	332.834	321.532	358.615	337.083	399.484	322.967	449.392	346.88	200.972	205.791	319.577	220.393	313.93	220.685	298.115	239.585	336.721	7.15706	9.23855	0	0	2.11946	5.10828	3.35807	3.43733	0	3.63279	7.2814	3.83042	0	5.89649	2.78627	1.69276	19.9995	1.28998	7.73415	3.40675
	lmo0732	Internalin	lmo0732	+	985958	5.2	1916	7.53608	6.13527	6.98317	4.02339	5.7761	5.11456	6.34889	4.40002	6.47754	4.76599	8.80142	10.5649	5.64785	5.55066	6.33091	5.20345	5.72707	5.45583	6.61784	5.05105	22.6808	22.7711	14.7753	7.09839	8.50769	18.3466	19.1552	5.80958	18.453	6.13993	9.22994	16.5895	14.712	10.3811	14.1276	4.64912	14.7884	5.45063	13.6165	7.19735
	lmo0733	transcriptional regulator	lmo0733	+	985919	1.2	509	16.5488	27.943	18.5198	16.5106	15.1527	14.6108	13.5136	9.30314	13.6786	11.0327	13.1238	20.3553	9.68852	5.43727	7.61966	6.31264	8.95756	6.07022	7.63499	6.93501	838.324	831.47	1028.91	722.626	578.987	898.531	904.012	573.226	892.751	566.876	668.818	726.992	1224.89	630.577	1221.37	643.895	1169.97	677.127	1029.78	673.634
	lmo0734	LacI family transcriptional regulator	lmo0734	-	985863	2.1.1	1004	27.2364	36.1334	39.5904	37.809	42.4067	34.2104	33.7045	33.8863	41.093	37.5833	23.1708	37.706	46.9243	40.4899	48.1849	38.4937	40.2508	37.3396	44.9314	33.5772	51.9154	38.471	94.9335	53.0313	32.4562	60.7275	67.6626	27.7039	44.2819	32.9391	40.102	43.2209	49.1097	19.0096	55.0185	29.3327	42.984	27.0319	31.1675	20.593
	lmo0735	ribulose-5-phosphate 3-epimerase	lmo0735	+	985578	3.5.2	671	0.339442	0.89426	0.996037	0.947678	0.944016	0.389072	0.327314	0.549143	0.934298	0.497408	0.415002	0.852969	1.18944	0.287896	1.33449	0.392692	0.986827	0.311275	1.02804	0.345127	2.1567	0	13.3103	1.68745	0	4.61797	12.143	0	8.4904	3.28411	8.77668	2.30851	12.5906	2.36912	11.7546	7.14132	14.0621	3.88723	17.0911	0
	lmo0736	ribose-5-phosphate isomerase B	lmo0736	+	985545	3.5.2	446	0.850504	0.960279	0.66551	0.316599	1.67723	0.584913	0.984137	0.235874	0.936388	0.373891	1.24779	1.13984	1.78815	1.29843	0.668736	0.590356	0.494518	0.561548	0.983507	0.778272	16.2115	0	6.67004	5.07368	1.92032	11.5708	3.04255	4.67154	25.5282	4.93718	2.19908	6.94104	15.7735	5.34246	12.6224	4.60112	9.06017	3.50633	11.6791	4.62998
	lmo0737	lmo0737	lmo0737	+	985544	1.2	932	0.896448	0.644097	1.51452	0.758413	1.48349	0.420348	1.33592	0.791049	1.04679	0.716524	1.04618	1.09219	1.47976	1.31327	1.85827	0.961654	1.50051	0.582915	1.95211	0.559305	9.32029	8.02061	15.9781	13.3694	9.20023	27.7177	14.5768	6.7144	11.0075	11.0385	21.0716	8.31362	25.694	5.11914	21.7706	8.08278	20.2567	11.7592	8.95272	5.17585
	lmo0738	PTS beta-glucoside transporter subunit IIABC	lmo0738	+	985543	6	1853	5.24946	5.18613	3.53	3.28228	4.16822	3.13776	3.32186	2.64442	3.64984	2.7344	5.22715	4.91231	4.23285	2.40006	5.09495	2.53356	3.69608	3.11396	3.92948	2.40807	38.3042	44.3989	48.2444	26.9119	34.2612	50.2148	44.0135	28.9086	38.1601	29.3621	28.1005	39.7453	34.9875	17.6036	40.7797	19.5982	21.8441	21.698	18.5845	22.6979
	lmo0739	6-phospho-beta-glucosidase	lmo0739	+	985542	1.2	1373	13.1152	12.7461	13.8024	11.9993	10.7031	10.9416	10.8323	9.32345	11.9822	8.63622	15.172	17.4749	17.029	12.3439	16.752	9.71819	17.6432	10.809	17.6436	10.2965	227.838	244.176	258.224	264.097	195.541	250.701	291.998	206.184	205.965	201.846	214.626	240.489	217.578	112.973	231.601	122.743	176.851	145.63	183.897	119.496
	lmo0740	transcriptional regulator	lmo0740	-	985541	6	659	22.6953	33.5591	23.8888	27.3391	21.3207	24.8581	25.6614	22.9242	21.9853	23.8877	27.8882	44.3888	22.0194	15.3405	25.1822	19.2719	20.3187	17.368	21.0298	13.8804	2.19592	0	0	0	1.30058	0	2.06063	0	6.91582	0	0	1.17524	6.40977	1.2061	1.70976	0	0	0.791581	0	0
	lmo0741	GntR family transcriptional regulator	lmo0741	+	985539	6	377	0.603453	0.227114	1.18049	0.374391	0.152568	0	0.387927	0.418395	1.29187	0.29476	0.184445	0.336975	0.768931	0	0.316323	0.279248	0.389858	0.221351	0.332296	0.306779	15.3366	6.59897	7.88758	2.99991	4.5417	8.20973	7.19586	1.84143	9.05643	0	2.6005	12.3121	18.6528	0	14.9265	5.44101	3.57134	2.76425	5.52439	5.47513
	lmo0742	ABC transporter ATP-binding protein	lmo0742	+	985536	6	689	0.661175	0.248838	0.646702	0.410202	0.668647	0.378922	0.531292	0.30561	1.21323	0.403694	0.707308	0.46151	2.1062	0.56077	1.64625	0.535427	0.640723	0.848833	1.09224	0.420154	18.904	36.1509	25.9261	11.504	16.1724	28.4842	15.7683	8.07026	18.1916	10.6614	38.4648	44.9658	28.6117	6.92196	26.1667	6.95503	5.86941	10.6003	21.1848	8.99826
	lmo0743	lmo0743	lmo0743	+	985534	6	704	1.07851	1.09594	1.68785	1.20442	0.736223	1.11258	1.55996	0.74777	0.692661	0.474125	1.6812	1.53575	2.06139	1.18915	2.20484	0.673759	1.77676	0.890113	1.51442	1.1514	18.5018	7.07634	23.26	11.2593	6.08781	10.2709	9.64552	7.89855	12.9488	9.39115	16.7317	22.0046	16.0017	9.03292	14.4056	4.86218	13.4039	9.63371	14.8101	5.8712
	lmo0744	ABC transporter ATP-binding protein	lmo0744	+	985533		2000	2.5839	2.57418	1.89551	1.62666	1.70044	1.2413	2.34501	1.2119	2.545	1.03011	3.06616	2.76906	2.46934	1.41804	3.28653	1.29241	3.31408	1.94437	2.60506	1.41983	10.8644	8.10278	13.4101	3.4002	4.71874	13.4408	12.234	1.04357	10.8351	4.77927	10.8075	12.0167	25.37	9.94535	17.4821	3.76873	7.4211	7.31055	18.7846	6.55045
	lmo0745	lmo0745	lmo0745	+	985532	6	503	7.09057	3.91771	4.27927	2.80793	5.03475	4.1501	3.78229	1.77818	4.84451	2.32124	8.85338	4.8019	6.63203	4.22247	7.3545	3.97928	5.70167	4.64837	5.35827	3.68135	20.1292	9.89845	8.87353	6.74981	3.40627	6.1573	8.09534	5.52428	4.52821	0	17.5534	12.3121	19.5854	3.15883	29.1066	1.36025	10.714	6.21956	14.5015	2.73756
	lmo0746	hypothetical protein	lmo0746	-	985530	6	299	0.506901	0.572326	0.495805	0	0.576708	0	0.244394	0	0	0.185699	0.464803	1.06147	0.968852	0.214962	0.996417	0.175926	0.982442	0.139451	0.418693	0.193271	0	0	4.96918	0	0	0	0	4.6404	0	0	0	0	0	0	0	0	0	0	0	0
	lmo0747	lmo0747	lmo0747	+	985529	4.2	341	0.222325	0.502041	0.652375	0.2069	0.337256	0.573369	1.0719	0.308291	0.815917	0	0.815443	1.30356	0.637403	0.754253	0.69924	0.308642	1.29269	0.244651	0.734549	0.508608	4.23774	7.29359	4.35893	0	0	0	0	0	0	2.15099	2.87424	4.53603	4.12324	2.32756	3.29953	4.00916	3.94727	1.52761	6.10591	2.01715
	lmo0748	lmo0748	lmo0748	+	985528	3.5.2	287	16.3687	27.7221	31.7625	17.1986	22.027	13.8445	16.5475	14.4608	20.3469	13.734	19.8509	36.9304	26.9967	8.73283	24.9104	12.8279	12.7922	13.0735	15.701	15.5019	0	4.33057	0	3.93739	2.98049	7.18351	4.72228	0	0	0	0	2.69327	9.7927	0	11.7546	2.38044	9.37476	3.62808	3.62538	2.39537
	lmo0749	lmo0749	lmo0749	+	985526	4.2	206	58.0364	65.1125	36.2872	45.8059	42.069	31.2611	40.7324	44.8228	32.6899	40.3694	59.616	63.6883	36.8585	35.2039	34.658	30.0859	30.6123	39.6122	32.1605	29.6909	0	6.02514	14.4034	0	0	4.99723	0	0	0	0	0	7.49431	6.81232	3.84554	10.9028	3.31192	0	0	5.04401	0
	lmo0750	lmo0750	lmo0750	+	985524	5.2	515	19.8929	28.7827	31.4202	20.2955	20.9001	16.341	24.7236	14.6098	22.0369	13.8195	26.3478	48.0131	29.7134	11.6229	26.1849	17.8995	21.4195	18.4043	22.6386	13.7087	2.80873	4.83413	5.77811	6.59283	0	6.0141	5.27139	0	4.42291	1.42566	7.62006	3.00644	24.5956	7.71343	32.8035	0	15.6973	4.04995	16.1878	13.3695
	lmo0751	lmo0751	lmo0751	+	985522	1.2	296	14.0806	18.7885	28.5463	12.6272	14.3692	10.5639	15.7992	9.58505	14.328	8.25329	22.7706	39.0279	25.2	9.98813	22.7465	12.6169	17.3664	15.072	15.6481	10.9325	9.75963	0	10.0387	7.63615	8.67052	6.96583	0	2.34364	3.84212	4.9538	16.5486	5.22331	37.9838	16.0813	30.3957	4.61661	40.908	12.3135	35.1552	11.6139
	lmo0752	hypothetical protein	lmo0752	+	985519	5.2	836	61.4095	54.9762	45.6709	41.8473	47.0599	45.9969	43.0099	47.3641	48.3409	43.9288	23.49	24.197	14.6717	13.021	16.3569	16.0793	15.4057	15.9944	17.333	17.1104	12.1208	7.45044	16.0296	5.4192	5.12773	12.3587	19.4985	5.82129	16.36	4.3945	9.39535	9.26716	21.902	10.4615	21.5711	7.37169	14.5158	6.86604	21.2065	11.539
	lmo0753	Crp/Fnr family transcriptional regulator	lmo0753	+	985518	5.2	680	10.7186	16.7664	8.0814	6.9617	7.36763	6.81475	6.78274	4.56733	7.68292	4.58112	14.026	19.7331	6.082	3.97727	5.61856	2.48002	4.76073	4.36169	4.98005	3.9165	10.641	1.83143	6.56719	8.32575	0	10.6329	5.99127	1.02211	8.37819	3.24071	5.77379	4.55601	14.4949	8.18235	18.2274	7.04695	11.894	13.0419	18.3984	7.09114
	lmo0754	hypothetical protein	lmo0754	+	985517	5.2	611	30.1904	31.2816	14.8255	18.0368	18.7524	17.5159	15.2147	18.2617	18.1242	17.5686	29.3919	35.1743	14.1291	13.4878	11.7225	11.211	9.27059	13.0564	10.3647	12.2215	4.73629	0	4.87174	1.85289	4.20775	15.2121	8.889	2.27471	13.0519	3.60608	3.21238	2.53484	18.4333	5.20278	16.5947	8.96166	13.235	5.97566	20.4728	4.50893
	lmo0755	hypothetical protein	lmo0755	+	985516	5.2	821	11.655	9.50396	10.3142	4.73454	13.5407	6.20243	8.47352	5.32308	11.7966	7.04843	13.8253	11.7769	12.5527	4.7072	10.6915	6.67749	10.3085	4.83498	10.7729	4.58489	14.1052	3.03456	10.8814	11.0362	1.04426	18.8764	18.1997	3.38715	22.2114	2.68482	7.1751	6.60538	18.8706	8.71561	27.456	15.0124	24.6344	12.0759	22.8637	9.23179
	lmo0756	ABC transporter ATP-binding protein	lmo0756	+	985514	5.2	905	17.5401	9.19134	12.313	8.66926	25.9073	11.1826	20.3122	14.605	15.8617	15.4954	16.0834	8.99791	13.2335	10.2498	17.0909	10.9517	15.6963	10.0663	19.9642	12.0954	7.99838	5.50642	13.1634	5.00648	0.947441	12.5593	21.0157	3.84139	11.3355	3.24786	14.1047	5.99297	23.3468	13.1792	36.1201	10.5938	22.3504	12.6863	27.6586	12.9445
	lmo0757	hypothetical protein	lmo0757	+	985511	4.5	980	89.6764	71.5846	77.2516	95.14	89.2398	95.5475	92.4512	101.566	93.939	101.197	100.21	99.0058	91.3299	89.4689	88.4282	87.4788	91.7096	90.5366	91.8052	90.1931	10.3416	3.81408	27.3533	2.31186	8.75006	24.2526	13.8636	3.54771	20.9378	8.99865	5.01013	7.11616	30.1867	13.7945	23.0059	16.7723	20.6417	7.98843	20.2223	8.43873
	lmo0758	lmo0758	lmo0758	+	985508	5.2	887	1.45563	1.54683	4.9413	5.65761	6.23468	4.93175	5.86216	6.17415	4.4779	6.08541	2.66947	3.22745	24.2213	24.4737	26.7282	26.5078	27.8801	27.1364	25.8854	24.8771	3.2642	11.2361	18.4665	6.38495	0.966646	23.2979	12.2524	1.5677	14.1354	4.14212	13.2836	7.86143	17.4681	7.1714	26.6861	13.8966	19.763	11.1784	9.4064	13.2069
	lmo0759	lmo0759	lmo0759	+	985503	3.8	959	5.30661	4.1136	6.97226	6.56003	6.36782	6.53641	6.18623	7.08395	5.88608	5.86113	7.55304	5.10833	64.7163	67.2428	73.7348	80.6511	75.3717	81.4917	76.4115	65.0477	12.0775	6.49586	24.8459	4.72487	3.57659	9.69774	11.3335	1.45012	16.6412	5.36404	12.2874	3.23192	23.5025	4.14597	19.9828	9.99785	19.687	3.26527	17.4018	8.62333
	lmo0760	lmo0760	lmo0760	+	985499	5.2	608	5.99291	4.36998	5.73961	5.46095	7.4811	7.08379	7.34386	7.01172	7.90394	5.76307	8.70074	9.20291	82.6865	76.4545	73.136	81.29	84.5722	83.3959	90.2356	61.1231	16.6587	12.2877	29.3744	5.58605	2.81899	22.0813	6.69959	6.85773	33.7274	6.03974	8.07051	10.1893	46.3103	13.071	40.7647	13.5087	26.6003	12.0102	22.2881	10.1951
	lmo0761	hypothetical protein	lmo0761	+	985498	1.2	620	3.06099	3.17959	4.31135	4.10202	3.80757	3.26294	4.48646	3.39567	5.72916	2.42216	5.16447	4.6151	45.4003	37.2809	43.4187	42.4942	48.8848	42.7785	49.96	31.2781	28.0059	28.1173	31.2074	7.30414	11.0581	46.6408	39.4208	5.60435	27.563	14.2153	26.9095	27.4791	43.1447	14.1003	50.8798	14.3516	32.6079	16.8259	38.6708	14.4416
	lmo0762	ATP/GTP-binding protein	lmo0762	+	985496	1.2	1256	81.2976	59.8962	89.8129	67.8327	89.5572	75.0881	82.709	73.1842	95.7894	74.8115	77.7629	73.011	89.3125	82.4449	92.7928	77.9701	81.7138	73.7194	91.6328	81.1369	16.1418	13.8909	15.4175	5.41273	6.82881	14.8128	14.0654	7.19871	10.8936	3.51141	14.0762	11.7244	22.4367	3.79965	21.5454	9.81719	15.0354	6.23441	18.274	7.68347
	lmo0763	hypothetical protein	lmo0763	+	985495	1.2	872	266.602	250.86	213.997	200.689	222.36	213.313	212.816	215.279	239.249	215.628	232.242	248.552	187.528	196.864	201.543	158.273	171.083	180.328	201.001	192.939	13.2812	1.42864	3.41524	1.29893	1.96651	7.10946	1.55787	0.797319	10.4569	5.05595	3.37797	4.4425	12.9223	10.9419	11.6334	4.7118	13.9172	2.39378	11.96	6.3218
	lmo0764	lipoate-protein ligase	lmo0764	+	985491	2.1.1	989	372.649	436.616	388.005	340.219	333.733	297.307	346.077	286.38	366.28	270.22	411.28	504.875	368.017	265.576	376.645	230.463	337.975	288.368	354.937	248.558	2.92789	2.5196	7.52906	3.43627	2.60116	3.13462	4.12127	2.81236	4.61054	4.45842	0.992918	1.56699	4.27318	0.804067	4.55936	0.692492	5.4544	1.05544	11.6012	2.78734
	lmo0765	lmo0765	lmo0765	+	985489	3.5.2	1298	0.643869	0.46262	1.43131	0.762617	1.10991	0.704462	1.58038	0.446417	0.966664	0.986392	0.429379	0.343201	0.895014	0.546093	1.05855	1.01574	1.30463	0.901762	0.91861	0.535624	13.3885	13.4418	14.919	13.0943	7.92962	18.3155	15.7046	6.96596	20.2044	7.92838	16.648	18.5108	30.3958	7.35359	27.7984	10.0275	18.7062	8.44597	18.4869	5.31075
	lmo0766	sugar ABC transporter permease	lmo0766	+	985488	6	890	0.768031	0.963513	1.50244	0.952996	1.03561	0.220081	1.06974	0.710004	0.861246	0.625249	0.938995	0.857755	1.30485	0.506644	1.14068	0.770047	0.909668	0.610392	0.986818	0.390446	14.6395	20.9967	10.0387	6.36345	4.81695	18.5755	16.7903	10.1558	12.8071	4.9538	17.6519	14.7994	26.9052	4.46704	22.7968	4.61661	16.6662	6.44992	17.5776	4.64556
	lmo0767	ABC transporter permease	lmo0767	+	985486	3.5.2	875	0.694384	0.294003	2.03755	0.484657	0.921679	0.149233	1.42284	0.12036	0.796357	0.445169	0.397947	0.363518	1.90784	0.368086	1.22846	0.361492	1.2617	0.238786	0.932022	0.264755	9.92675	7.11875	10.2106	2.58897	1.95977	11.8085	6.21013	3.97294	2.60527	0	8.97706	6.1982	11.2683	3.63482	3.86452	1.56522	1.54106	3.57838	13.111	2.36256
	lmo0768	sugar ABC transporter substrate-binding protein	lmo0768	+	985485	2.1.1	1253	1.15205	0.889981	1.30475	0.959265	1.28771	0.677618	0.877012	0.336318	1.66892	0.577533	0.611582	0.457093	1.85426	0.257132	1.04886	0.252525	1.35144	0.200169	0.600995	0.0924741	2.31149	1.98916	4.75519	3.61712	3.42257	7.42411	3.25363	3.8855	10.0097	3.51981	3.91941	4.32985	5.6226	0.634789	4.49937	1.64011	5.38264	2.08311	6.66099	2.20053
	lmo0769	alpha-1,6-mannanase	lmo0769	+	985482	5.2	1028	1.62563	2.08574	3.10782	1.23778	1.96159	1.14339	2.77883	0.563553	1.76267	0.703816	2.03266	1.73302	3.24834	0.626711	1.9754	0.923227	2.07659	0.609844	1.83102	0.788861	0	2.42411	8.69244	4.40804	1.66838	3.01582	0	2.70577	4.4358	2.85963	1.91057	3.0152	5.48163	0.773592	8.77311	1.99874	1.31192	2.03088	7.10279	0.670424
	lmo0770	LacI family transcriptional regulator	lmo0770	-	985481	6	1118	23.2386	44.0369	114.912	126.343	87.1504	93.6943	106.275	97.0497	79.1122	91.2066	31.8383	58.1675	130.263	60.3968	113.212	94.9435	103.775	101.616	107.423	63.5255	19.4277	26.7497	29.3088	19.2541	10.7394	20.3372	18.2308	9.33056	17.3359	12.4908	29.8674	29.1133	22.6834	11.382	24.2025	9.18991	18.096	9.33768	19.5946	6.78153
	lmo0771	lmo0771	lmo0771	+	985478	3.5.2	752	83.0024	134.417	102.519	62.9604	86.6211	67.7078	76.2393	56.1483	74.4857	57.4853	110.182	176.01	67.3565	42.3073	64.6281	39.4607	48.535	50.0024	57.049	48.2022	9.62354	8.28157	17.8178	6.02373	4.55979	6.8687	7.22453	6.47068	1.51542	2.93084	14.3597	8.24075	7.49083	3.17142	2.99719	2.73134	1.79278	3.46908	2.7732	2.74847
	lmo0772	transcriptional regulator	lmo0772	+	985477	6	647	87.8862	112.478	77.8138	64.8633	66.5706	72.0215	63.5877	68.3379	69.0073	64.9087	96.1883	120.595	45.9756	45.7789	48.5292	43.0042	41.2762	44.7406	44.7769	47.9598	2.23658	5.77409	4.60109	3.4999	13.2466	3.19267	6.29638	5.37083	5.28292	6.81148	10.6187	8.37905	4.35231	0	1.74142	2.11595	2.08328	2.41872	3.22256	2.12922
	lmo0773	alcohol dehydrogenase	lmo0773	-	985473	6	989	70.4285	66.2511	86.7659	106.855	96.7588	148.423	137.601	169.762	89.7731	134.829	101.975	119.914	75.5999	69.8301	75.3049	87.8031	73.9064	88.0655	77.8388	75.9027	52.702	42.8333	144.558	73.307	84.104	97.1733	107.153	73.1214	125.637	64.6472	48.653	44.6593	109.678	52.2643	83.2083	40.1645	65.4529	35.3573	89.6458	46.6879
	lmo0774	hypothetical protein	lmo0774	+	985472	5.2	929	159.919	114.65	87.7255	77.2272	92.3353	80.7562	97.4423	84.2918	92.5645	76.496	161.406	128.815	113.996	85.222	112.049	99.1429	104.107	86.8195	105.619	82.8571	12.4671	5.36432	16.0296	15.8512	5.53794	11.1229	16.0862	11.9752	12.27	8.70112	12.6837	13.3447	24.2606	6.84753	25.4809	11.0575	26.1284	13.4824	23.5767	9.64329
	lmo0775	lmo0775	lmo0775	+	985469	6	332	410.315	358.349	219.986	231.829	233.627	248.109	269.714	213.562	254.742	189.714	420.207	358.032	274.508	201.406	263.198	205.564	252.912	201.639	263.475	177.078	13.0568	0	4.47674	6.81062	0	9.31915	8.16827	2.09027	13.707	2.20913	5.90383	6.98794	33.8775	4.78094	30.4984	4.11752	12.1618	3.1378	15.6773	16.5734
	lmo0776	transcriptional regulator	lmo0776	-	985467	1.2	866	1.22779	1.28724	1.80137	4.89688	3.19285	4.74964	4.3974	3.8307	3.70127	4.36939	1.68873	2.6445	4.02292	2.23144	2.2066	2.55671	2.80455	2.26789	3.9841	1.9394	180.536	120.836	116.922	65.3961	51.4831	121.697	98.8248	51.3816	90.815	45.8184	90.7025	84.9917	81.3235	24.7897	80.6959	41.1182	59.168	41.5785	62.6225	38.1933
	lmo0777	lmo0777	lmo0777	+	985466	1.2	383	337.406	357.033	174.306	132.491	186.679	132.26	158.474	142.091	185.121	117.658	320.46	388.598	101.427	85.8169	97.7734	83.1526	90.9526	69.9434	77.033	83.65	33.9681	25.9834	77.6434	29.5304	29.0598	53.8763	35.4171	19.9392	59.4328	15.3258	28.1585	8.0798	44.0672	18.6569	23.5092	10.712	42.1864	13.6053	40.7856	21.5583
	lmo0778	lmo0778	lmo0778	+	985465	1.2	347	178.071	255.327	111.129	104.717	103.078	83.7712	103.657	79.6826	110.455	73.159	236.208	275.8	43.2225	38.9155	50.6798	31.3937	36.2064	39.7916	36.6356	47.318	0	0	72.8241	29.3267	19.7329	20.8074	23.4486	6.00052	19.6743	19.0252	5.64936	8.91564	8.10431	11.4372	12.9706	3.94004	7.75842	7.50637	9.00095	7.9295
	lmo0779	lmo0779	lmo0779	-	985463	1.2	467	295.529	465.015	537.281	476.722	704.742	503.778	511.504	496.313	606.234	431.631	339.514	548.291	431.791	360.613	479.302	369.896	414.074	443.025	488.609	382.082	334.455	175.888	273.942	133.265	84.3708	207.769	185.985	101.137	243.827	97.4566	191.137	160.767	39.1708	39.1209	72.3359	29.2977	46.1527	31.2573	84.7782	53.0666
	lmo0780	lmo0780	lmo0780	+	985461	3.5.2	347	6.11776	9.12762	10.0443	4.27	7.45743	3.19307	9.05944	2.27232	9.42173	2.40128	7.01211	7.13748	2.08804	0.741248	2.06155	1.06162	1.2704	0.961732	1.44377	1.83274	0	0	0	0	0	0	0	0	0	0	0	0	8.10431	4.57486	19.4559	0	19.3961	3.00255	0	3.96475
	lmo0781	PTS mannose transporter subunit IID	lmo0781	-	985460	2.5	878	107.608	71.3943	25.1287	19.3201	26.8999	27.2908	24.8565	22.1906	31.3488	23.5134	102.082	78.4692	627.853	438.141	527.727	506.703	658.286	461.188	610.391	319.458	199.506	95.0656	154.333	101.915	80.0765	136.511	123.779	81.5633	167.467	66.9524	109.594	76.7719	43.3152	33.5073	35.9458	17.9386	44.5381	20.2083	40.3865	23.5449
	lmo0782	PTS mannose transporter subunit IIC	lmo0782	-	985459	1.2	812	23.194	15.9449	6.03748	4.09067	6.80984	4.82392	4.96003	5.38201	4.89099	3.56323	21.9538	16.9209	294.32	152.853	235.316	178.198	269.628	156.021	257.01	117.745	119.438	78.2379	152.193	80.8981	62.2933	157.772	110.407	74.4861	99.6541	68.7683	88.2634	56.2903	26.0175	30.3528	44.4159	16.8651	28.2281	25.0619	23.1168	30.5476
	lmo0783	PTS mannose transporter subunit IIB	lmo0783	-	985458	5.2	485	53.6626	38.3317	11.936	10.3374	13.6464	13.4494	13.1249	14.1015	14.3541	11.0044	45.0457	28.9612	771.344	511.795	664.893	610.963	731.676	507.447	679.73	392.03	26.839	28.2289	70.55	30.3325	33.5581	59.5965	61.5646	20.0511	58.6991	24.2186	38.4296	25.5362	5.80308	8.18957	20.8971	12.6957	19.4439	8.59989	30.0773	1.41948
	lmo0784	PTS mannose transporter subunit IIB	lmo0784	-	985456	5.2	434	80.9293	47.957	17.0967	15.128	16.3069	22.8399	20.8999	21.0871	14.2729	12.9349	64.1107	38.0666	1282.39	942.127	1135.23	1058.47	1207.56	933.264	1106.65	742.693	49.9761	20.07	30.8432	31.2819	23.6795	52.3158	68.7825	20.8018	47.2183	16.9113	38.4156	19.6144	32.4172	10.9797	18.1588	12.6081	18.6202	8.40713	12.0013	12.6872
	lmo0785	transcriptional regulator	lmo0785	-	985452	3.5.2	2816	26.5866	24.8679	26.8759	20.3463	29.1937	17.7506	24.986	20.8289	26.8444	21.0222	22.4234	18.3808	32.4499	23.7626	33.7657	24.225	27.6998	24.2666	32.1265	22.1057	43.2168	23.9081	62.9747	18.9196	23.463	44.7994	38.6231	22.4854	38.8877	16.1909	37.6865	23.9554	49.558	25.7147	58.8856	25.797	34.0247	28.3755	37.4353	27.4281
	lmo0786	ACP phosphodiesterase	lmo0786	+	985450	5.2	635	140.832	149.156	124.302	175.787	111.533	172.66	163.929	182.026	111.771	169.932	187.785	185.958	101.684	73.3102	92.4035	91.9463	91.1771	114.981	89.3672	74.7557	4.55756	1.96101	7.03185	1.78297	1.34966	6.50582	4.27679	1.09443	1.7942	4.62667	6.18232	1.21959	8.86886	0	8.87139	2.15587	6.36776	3.28581	6.56673	0
	lmo0787	amino acid transporter	lmo0787	+	985449	5.2	1376	115.626	107.67	206.639	149.845	167.777	157.928	209.998	160.374	160.445	157.217	139.694	119.051	178.098	117.972	184.261	132.769	154.269	148.231	169.302	117.057	22.1027	8.15166	10.8261	8.23506	7.48045	7.51217	4.93834	6.06588	20.7173	9.61621	7.13862	3.37979	7.16851	2.89044	10.6534	4.9787	13.7251	4.93229	12.8903	4.50893
	lmo0788	lmo0788	lmo0788	+	985448	5.2	4427	58.4859	28.9653	14.5282	14.7976	9.6118	19.7804	17.452	20.8942	11.359	18.4189	78.1441	43.5232	28.5043	14.8551	22.8042	16.3053	26.275	27.6918	24.75	12.3871	16.0379	14.9281	27.2699	11.5241	15.5082	28.734	28.2569	9.7461	30.1513	12.2939	15.5396	17.1668	37.26	16.8985	39.7554	13.6246	26.5237	14.7483	31.1252	16.2028
	lmo0789	hypothetical protein	lmo0789	-	985444	5.2	848	46.839	87.1635	92.0655	67.6762	76.7585	60.8987	61.7462	56.195	73.2941	60.4998	87.4584	178.237	113.232	79.7562	123.513	74.349	97.897	94.6592	113.698	86.7329	11.9495	2.93806	7.02357	2.6713	0	4.87362	0	4.91915	1.34406	1.73296	3.47346	7.30894	11.6267	0	3.98742	1.615	4.77019	3.07682	2.45962	2.43769
	lmo0790	transcriptional regulator	lmo0790	-	985443	5.2	476	80.3389	131.383	85.2847	97.6101	101.317	104.281	78.2369	92.2837	100.327	101.142	103.923	152.879	110.748	132.087	128.594	112.305	109.521	118.84	124.291	131.886	12.1535	10.4587	9.37581	11.8865	7.19817	13.0116	19.9583	4.37774	28.7072	7.71111	37.0939	9.75674	35.4755	3.33763	14.1942	8.62349	19.8108	4.38108	17.5113	8.67756
	lmo0791	lmo0791	lmo0791	+	985441	5.2	650	111.308	188.182	98.9325	113.912	78.1346	98.0963	104.74	83.4091	88.5138	92.2505	211.946	246.34	118.093	106.589	133.988	137.741	108.544	132.896	119.048	102.959	280.511	402.324	764.841	364.054	290.083	530.719	350.972	224.535	354.077	257.644	350.312	648.171	816.63	253.114	885.765	312.77	628.325	360.333	641.542	303.075
	lmo0792	hypothetical protein	lmo0792	+	985439	6	890	44.4605	40.3712	26.7935	36.6109	31.8452	40.2748	29.7058	40.766	30.3785	34.6388	0	0	0	0	0	0	0	0	0	0	146.395	99.3844	105.407	72.5434	37.5722	91.7168	88.5309	48.4351	78.1231	41.2817	0	0	0	0.893407	1.26649	0	0	0	0	0
	lmo0793	hypothetical protein	lmo0793	-	985432	1.2	701	83.292	81.691	47.0379	53.2211	67.8577	61.5465	51.9076	65.7846	65.8853	72.6925	48.8639	24.4048	38.5057	28.6616	36.3649	30.8998	32.7481	26.162	39.1854	26.5954	247.745	136.802	97.6847	85.6129	91.7074	122.304	125.928	109.069	102.407	103.744	133.025	96.1289	20.0876	6.80364	24.112	11.7191	24.9994	17.1171	11.8987	15.7234
	lmo0794	hypothetical protein	lmo0794	-	985430	5.2	641	69.758	64.3199	33.7101	34.4982	40.3336	46.2232	32.7762	47.4624	38.9009	39.6563	65.5936	76.1879	826.92	910.977	853.845	872.396	870.195	1031.87	946.07	755.292	47.4072	25.2549	48.763	28.2609	10.6963	32.2251	27.5393	21.6841	39.1035	18.3337	47.4652	20.5393	4.39299	4.95966	10.5462	4.27145	10.5137	4.06887	3.25268	7.52191
	lmo0795	hypothetical protein	lmo0795	-	985429	5.2	920	169.242	157.623	102.714	82.899	114.841	85.7327	85.9758	84.9437	98.5439	86.1958	125.966	123.504	88.0488	63.9985	85.2309	62.9208	76.4832	69.4076	81.8292	63.836	42.4878	27.0837	21.0421	13.5436	16.7762	24.7094	26.5801	14.3595	21.0628	17.5723	28.8172	20.2127	16.8422	5.18584	13.4776	7.44373	7.3288	6.23982	12.4704	7.4904
	lmo0796	hypothetical protein	lmo0796	-	985428	1.8	530	58.9952	44.2987	36.8352	39.8441	32.9082	46.1611	51.088	43.9811	41.2522	38.6086	118.17	119.82	2434.04	2604.2	2583.82	3174.42	2804.68	3299.87	2859.18	2148.69	24.5645	30.5342	44.9191	23.4909	9.69922	31.1691	35.8573	9.17593	49.4266	16.6246	31.4704	17.5291	13.2782	5.99643	25.5015	19.3663	17.7962	25.581	21.6294	14.291
	lmo0797	lmo0797	lmo0797	+	985426	2.3	461	97.7594	137.507	135.22	218.559	107.103	156.336	157.428	171.048	111.134	132.039	83.9059	101.322	75.1804	44.5278	65.3494	60.546	57.0964	58.2254	62.1242	41.7917	12.5481	0	32.2674	7.36343	7.43187	15.6731	17.6626	12.053	9.87974	7.96147	2.12768	0	27.4704	5.169	14.6551	8.90347	5.844	11.3083	13.5599	5.97287
	lmo0798	lysine-specific permease	lmo0798	-	985421	1.2	1460	25.0328	18.6858	116.825	85.8709	101.802	77.0857	122.197	94.827	92.9668	101.353	17.5136	10.8981	87.336	63.4734	82.3732	55.2343	80.7438	75.1948	90.2726	51.7506	89.2796	75.1225	74.4866	109.438	99.8801	104.08	121.945	102.432	96.8498	89.1227	37.005	34.5092	70.4592	30.5116	65.6519	34.7241	35.112	36.4745	50.0258	36.8306
	lmo0799	lmo0799	lmo0799	-	985420	5.1	761	127.024	164.15	506.541	540.264	469.692	582.272	569.515	613.795	459.488	529.535	93.1435	162.397	613.734	458.614	591.338	546.34	605.613	591.569	626.144	395.749	47.5494	29.4615	109.557	72.9192	30.4151	77.3783	71.392	56.6348	70.3834	32.8238	41.2804	37.6633	61.0695	24.027	69.602	27.8905	60.2347	21.2543	75.3623	31.6868
	lmo0800	hypothetical protein	lmo0800	+	985418	5.1	350	551.958	1286.51	1112.38	2113.73	1505.03	1662.22	1452.79	1694.63	1408.53	1778.43	534.324	1122.62	894.739	960.531	921.302	1422.6	1024.64	1291.29	990.907	1211.82	12.3872	14.2132	21.2358	12.9227	12.2277	26.5237	30.9976	5.94923	9.75308	10.4792	11.2021	22.0986	12.0526	6.80364	6.42986	7.81273	19.2303	8.93065	8.92402	1.96543
	lmo0801	internalin	lmo0801	+	985415	3.5.2	1940	3.76062	5.17482	11.1499	9.66068	8.37875	8.924	10.1611	8.47395	8.08666	7.51981	0	0	0	0	0	0	0	0	0	0	39.574	32.1279	28.4172	19.2792	16.3628	29.3114	20.3197	10.041	25.2796	15.918	0	0	0	0	0	0	0	0	0	0
	lmo0802	hypothetical protein	lmo0802	+	985413	1.2	638	140.29	246.665	121.856	115.497	180.233	96.3583	108.543	109.231	126.64	134.697	151.661	260.235	124.177	112.426	118.728	111.502	121.998	143.838	106.836	155.343	15.8766	17.5663	37.3272	17.746	20.1498	27.5199	23.4119	11.9823	23.2151	8.05865	9.22994	24.2773	8.82723	2.49147	7.06379	1.07287	2.11262	4.08798	6.5359	4.31841
	lmo0803	Na+/H+ antiporter	lmo0803	+	985412	1.2	2048	120.342	130.093	81.1581	76.1127	90.2355	76.2421	75.7872	79.1153	81.7792	79.7446	127.6	146.741	99.3322	105.215	107.549	103.804	101.696	113.909	109.577	106.568	45.976	48.0865	92.399	59.7699	61.1633	106.017	84.9596	46.8796	90.7764	61.0341	10.0746	12.8709	16.5171	8.15839	17.6233	7.3609	9.88261	6.88432	16.8158	10.1005
	lmo0804	lmo0804	lmo0804	-	985406	1.2	470	26.3136	33.9021	20.6849	16.9764	16.285	13.7389	13.3872	11.8643	17.0329	15.0215	30.4934	38.808	13.1134	7.80435	13.2009	5.49069	7.66555	8.52695	12.5341	7.38615	18.4625	7.94398	12.6603	7.22272	10.9348	4.39247	17.3251	1.47783	9.69095	6.24747	0	0	0	0	0	0	0	1.10922	2.21679	4.39405
	lmo0805	lmo0805	lmo0805	-	985405	1.2	461	14.4829	19.3253	10.1415	11.6402	8.98766	6.64959	11.2675	9.69916	10.1168	11.4555	14.9401	12.6825	3.93203	3.76881	4.65857	3.65561	3.66821	4.70874	5.30163	4.26702	0	2.69958	0	0	3.71594	2.23902	0	1.50662	0	0	0	0	0	0	0	0	2.922	0	0	0
	lmo0806	transcriptional regulator	lmo0806	+	985404	2.1.1	542	75.475	55.4935	9.86131	8.0794	10.8332	8.78743	8.23649	5.33974	10.5348	5.02721	86.669	64.5094	5.21896	4.98807	7.15658	4.17946	3.7995	3.54406	4.85776	7.58134	0	2.29688	19.2178	4.17668	1.58081	3.81004	5.00927	1.28188	10.5075	0	5.43088	11.4278	7.79088	0	8.31264	3.78766	12.4306	2.88643	9.61428	3.81142
	lmo0807	spermidine/putrescine ABC transporter ATP-binding protein	lmo0807	+	985403	5.2	1094	45.135	28.9299	10.1878	7.75451	11.6395	6.86472	8.63749	6.1143	9.42887	5.79992	51.8923	40.016	6.50326	5.71269	6.77017	5.20548	4.64305	4.27905	5.27668	5.98345	2.64713	3.417	10.8913	3.10676	3.91955	16.0596	11.1782	5.08537	5.21055	2.01545	10.7725	7.79203	16.7415	5.81571	19.5803	6.26089	12.3284	4.77117	13.3494	5.04012
	lmo0808	spermidine/putrescine ABC transporter permease	lmo0808	+	985401	2.1.1	809	22.2473	21.3033	10.3752	4.89204	8.11663	5.40666	8.14647	4.29552	9.1292	4.47053	27.8882	26.4975	6.36931	3.10501	6.49516	3.25789	4.91221	3.20221	4.80722	4.79598	10.7356	7.69879	1.84044	4.19988	4.23892	5.10828	6.71614	3.43733	5.63511	0	7.2814	6.70324	8.70463	1.9655	9.75196	4.2319	0	3.22496	10.3122	3.40675
	lmo0809	spermidine/putrescine ABC transporter permease	lmo0809	+	985399	2.1.1	806	18.3728	10.5317	10.0451	5.0856	10.0763	3.80683	7.9042	4.70344	9.76825	4.14199	18.402	19.0986	7.20336	4.31522	7.26014	4.3818	5.66091	3.47332	4.51379	5.46044	16.1633	13.9093	9.23639	11.2413	7.44569	15.3818	16.8528	6.90022	18.3822	2.73472	7.30846	12.4952	8.73698	10.8504	13.9832	8.49526	15.0554	10.3582	15.5258	9.40338
	lmo0810	spermidine/putrescine ABC transporter substrate-binding protein	lmo0810	+	985395	3.5.2	1073	26.8317	20.4631	16.1344	9.94856	19.1699	10.5897	14.4725	10.7006	16.4984	8.04004	33.3671	27.8711	10.8928	9.78738	13.8608	8.30489	8.30136	8.10219	10.6428	9.8255	6.74723	6.96762	19.4325	2.11167	4.79543	20.2262	12.6631	3.8886	16.9998	5.47963	11.8984	11.5555	9.19092	4.44707	13.659	7.02164	20.1112	4.86446	16.5269	7.06567
	lmo0811	carbonic anhydrase	lmo0811	+	985394	3.5.2	701	538.311	1253.62	1260.06	1379.31	1616.51	1551.51	1127.87	1445.01	1672.67	1579.39	353.27	838.926	967.196	1049.27	1072.72	985.787	1008.79	1019.96	1113.03	1052.17	12.3872	8.88322	10.6179	4.84602	8.55936	7.3677	3.87469	8.92384	17.8806	6.28752	12.6024	9.94437	8.03504	4.53576	9.64479	6.83614	9.61514	6.69799	19.3354	3.93086
	lmo0812	lmo0812	lmo0812	+	985393	2.6	542	42.2884	50.9086	48.0739	81.0546	59.4763	77.6424	63.5965	82.6203	68.7331	77.9731	41.8579	53.1322	69.0508	64.8449	68.1527	81.2565	74.0902	73.2696	75.758	72.2897	5.33814	2.29688	10.9816	6.26501	3.16163	13.3351	12.5232	5.12751	10.5075	2.70954	3.62058	7.14237	12.9848	1.46598	22.8598	3.78766	17.4029	5.77285	21.1514	3.81142
	lmo0813	fructokinase	lmo0813	+	985392	1.2	872	6.88061	3.73684	8.09304	4.78217	7.33271	8.53551	8.81834	8.63533	7.43157	6.89192	3.43411	3.20995	7.6576	4.35834	6.84822	4.83646	6.07696	3.64202	6.97822	4.05138	8.30072	4.28593	5.12286	5.19573	2.94976	9.47927	10.9051	6.37856	13.0711	1.68532	5.62994	1.777	9.69175	5.47097	18.0964	3.9265	23.1953	4.18912	17.94	7.11202
	lmo0814	oxidoreductase	lmo0814	+	985391	6	929	191.559	125.82	21.4316	29.1409	24.6186	30.5032	27.1987	40.4736	23.3286	39.1166	152.035	110.872	5.78186	11.1642	8.99989	12.7688	6.81371	10.4813	7.83361	12.9679	73.2445	56.3254	44.8829	32.9216	47.9955	45.6037	49.7211	44.9071	41.718	45.8786	58.1337	50.8767	51.5538	42.7971	77.6561	36.8584	55.1599	44.9414	55.0123	39.315
	lmo0815	transcriptional regulator	lmo0815	+	985389	2.2	452	35.4159	61.0229	26.1036	19.994	21.3878	15.0063	19.7457	11.8702	25.8716	11.806	50.4819	84.7772	17.3239	7.40267	20.5882	8.73805	10.8979	13.2986	15.1118	7.67964	25.5948	27.5321	29.6176	17.5227	17.0539	20.5515	24.018	7.68278	20.152	12.9914	13.0197	6.8491	18.6775	3.51446	7.47312	4.54018	20.8604	6.91978	4.60976	1.52288
	lmo0816	regulatory protein PaiA	lmo0816	+	985388	1.8	506	27.4446	35.8974	20.3896	12.7005	13.4224	9.02462	12.8705	9.15023	16.0987	8.90037	59.4067	94.716	26.2278	6.61422	21.815	11.659	14.9692	13.12	20.1914	9.60636	5.71718	12.2998	14.7017	6.70987	11.8514	0	13.4124	8.2374	6.75213	11.6077	9.69417	10.7093	19.4695	9.42042	28.9344	17.5786	23.9639	10.3046	24.7127	20.4102
	lmo0817	PhnB protein	lmo0817	-	985387	3.5.2	413	35.9973	35.4594	27.4848	35.209	24.6564	37.4186	38.253	35.2725	28.6458	31.219	37.2179	47.997	34.2258	28.5058	41.8784	33.1455	36.4856	41.3301	32.6156	28.2904	24.5052	30.1257	14.4034	8.21716	14.5137	19.9889	16.4253	5.04391	13.7815	14.2153	47.4874	43.0923	37.4677	13.4594	10.9028	23.1834	6.52157	15.1433	22.6981	14.9971
	lmo0818	cation-transporting ATPase	lmo0818	+	985383	2.1.1	2630	148.718	136.229	23.2073	18.3153	30.0958	19.3285	21.374	15.5088	26.4089	16.2196	73.8808	90.8485	68.9078	37.4284	66.6929	43.5302	64.9453	40.8813	66.671	32.2632	9.91543	2.84425	10.7656	10.7751	5.54636	15.7267	10.3384	8.73051	12.1441	6.99012	7.09874	2.65334	16.0792	7.86647	22.7318	7.29604	16.4192	7.54574	13.4929	5.76855
	lmo0819	lmo0819	lmo0819	+	985382	6	848	187.267	187.27	46.2518	29.5875	50.9459	31.7966	37.9113	25.8311	45.5212	21.5883	115.462	190.765	179.306	69.3499	157.173	99.8365	153.702	90.5693	145.581	60.6447	5.12122	2.93806	3.51179	4.00695	1.01105	7.31043	1.60191	0	9.40844	2.59943	1.15782	3.65447	13.2876	0	10.6331	3.23	0	0.615363	3.68944	3.25025
	lmo0820	acetyltransferase	lmo0820	+	985380	2.4	557	213.116	242.469	121.286	111.085	137.666	110.931	117.335	114.6	136.146	110.92	169.428	255.096	169.289	153.825	180.105	153.699	161.892	160.144	176.706	128.432	20.7786	8.94053	24.0444	8.1288	10.7682	11.1229	17.0612	18.7113	18.405	7.91011	14.093	11.1206	27.7986	7.13285	26.2898	11.0575	14.5158	10.2991	16.8405	8.65424
	lmo0821	lmo0821	lmo0821	+	985377	1.2	662	228.335	254.18	129.223	119.641	135.174	112.292	130.823	106.39	138.049	107.638	227.459	290.2	193.88	141.136	207.85	152.841	178.818	160.463	191.727	142.286	15.3019	9.40577	17.988	10.2622	12.9469	10.9215	26.667	11.5485	15.4902	7.76694	13.3437	11.6993	14.8885	9.60514	13.6162	8.2723	22.3976	15.76	20.4728	14.5673
	lmo0822	transcriptional regulator	lmo0822	-	985376	4.4	389	72.9157	146.383	97.4447	234.233	162.661	169.779	193.447	193.839	206.063	179.985	99.9325	234.994	202.9	190.489	224.117	253.469	192.521	223.444	212.084	196.096	330.739	140.71	221.702	127.935	85.8381	230.757	139.489	103.517	125.815	75.4503	100.819	125.299	249.488	93.8902	263.303	65.041	197.303	111.187	192.759	95.5199
	lmo0823	oxidoreductase	lmo0823	+	985374	4.4	824	174.189	301.98	1180.56	1109.94	1013.96	1129.25	1421.75	1206.63	1084.13	1134.52	255.388	491.056	2661.44	1685.38	2523.94	2257.16	2916.15	2168.64	2733.38	1396.26	3.51347	3.02353	14.4558	4.12352	0	8.77695	4.94552	1.68742	8.29898	6.24179	2.383	2.82059	3.41854	1.92976	9.57465	4.15495	4.90896	6.96591	10.1247	4.18101
	lmo0824	lmo0824	lmo0824	+	985373	1.4	968	30.1315	20.9085	15.657	16.1382	13.3315	12.5467	16.419	13.9275	15.9824	14.0855	19.7865	14.9855	12.7481	8.38552	12.3395	12.4728	12.5467	8.3757	12.0552	9.33444	5.98269	3.86131	18.4613	7.02147	6.2009	20.2829	32.2811	10.0566	14.1314	7.59174	23.332	6.40381	32.0158	16.4298	31.4426	16.98	23.6836	14.5572	25.8603	13.5268
	lmo0825	3-hydroxy-3-methylglutaryl-CoA reductase	lmo0825	+	985372	2.1.2	1280	23.1489	16.2182	11.0308	8.67237	15.8021	10.5623	14.3088	11.1115	13.2333	12.09	22.2604	16.8046	9.5297	8.05478	13.3478	8.98171	11.619	7.4461	11.8646	7.87567	3.39416	4.86809	20.9474	3.54088	2.68035	14.5353	10.6168	4.34698	14.2527	4.01989	5.37152	5.44961	8.80655	8.69974	11.4518	6.42217	15.8076	5.70976	13.8563	5.92391
	lmo0826	transporter	lmo0826	+	985369	5.2	1634	86.9172	75.6626	48.7617	45.8317	52.8737	43.3362	51.9281	41.2392	54.4007	40.1042	79.8693	68.4016	34.1765	28.7536	34.4815	28.0836	30.5999	26.2782	30.8834	29.5048	6.20498	0.762816	5.47065	1.38712	1.05001	11.3882	10.8136	0.851449	6.97926	2.24966	4.80973	2.37205	9.48724	4.86866	7.59196	4.61238	7.431	2.87583	8.94039	1.68775
	lmo0827	transposase	lmo0827	+	985368	4.4	305	3.23025	3.08607	2.43042	6.47476	3.20393	5.55381	5.51085	5.34069	3.87561	5.27968	13.8985	9.1578	10.6859	6.95465	5.47052	16.2128	4.3343	6.69912	14.5722	7.95821	9.47259	8.15166	19.487	7.41155	2.80517	13.5219	17.778	9.09882	14.9165	2.40405	25.699	10.1394	13.825	0	22.1263	13.4425	13.235	11.9513	20.4728	4.50893
	lmo0828	transposase	lmo0828	+	985365	3.5.2	836	3.27033	3.69243	2.66562	2.78982	1.86035	2.3428	2.97828	2.83429	3.08382	2.79547	5.41437	0.228274	3.03852	1.38685	6.78563	2.77446	3.2572	4.49842	4.20194	4.36418	50.2149	50.663	0	0	0	0	0	21.6219	62.7133	0	98.6512	152.908	25.2715	0	0	0	0	13.7321	0	0
	lmo0829	pyruvate-flavodoxin oxidoreductase	nifJ	+	985364	5.1	3647	85.4561	66.34	42.4451	52.8178	36.1391	62.7481	55.9936	64.4232	39.164	56.5496	97.6812	81.4435	35.3958	30.0523	32.4983	33.0151	32.5595	36.8353	33.9155	29.3403	17.4807	12.3079	25.3363	12.7447	12.9416	29.2066	24.6056	14.6921	29.4036	12.5027	9.43108	6.80404	15.4622	6.76447	12.9919	6.20168	14.4322	8.01996	16.028	6.80789
	lmo0830	fructose-1,6-bisphosphatase	fbp	-	985361	1.8	1961	53.054	113.284	128.727	106.825	108.228	94.6813	120.142	83.5639	122.419	84.3596	35.0023	33.3698	22.2584	19.4912	22.8536	17.2967	22.3077	20.5125	21.5428	16.8743	10.3416	6.3568	17.4757	7.51355	6.56255	14.2352	13.8636	6.38587	16.285	7.12394	10.5213	9.48821	22.2806	10.143	22.4308	5.24134	15.8253	6.39074	13.3042	4.57098
	lmo0831	lmo0831	lmo0831	-	985359	5.2	911	53.8582	70.6936	50.396	34.992	41.8619	37.6273	37.1415	34.0469	38.3226	41.4769	58.9412	74.6522	38.1645	27.4359	38.8078	30.2084	31.1053	32.8444	39.2525	27.7827	20.659	12.3079	37.5957	19.8942	9.41207	38.5641	32.8074	10.6851	27.5268	8.87285	24.7903	19.5616	49.4789	9.60119	32.1705	10.5241	31.0847	14.8942	38.9252	12.8593
	lmo0832	transposase	lmo0832	+	985355	1.2	284	1.60074	1.2049	2.34855	0.24828	1.01177	0.458695	0.257257	0.369949	0.734325	0.195473	0.733899	2.68161	2.03969	0	0.839088	0.555556	1.29269	0.587162	1.10182	0	0	4.37616	0	0	0	0	0	0	0	0	0	0	0	0	0	0	0	0	0	0
	lmo0833	transcriptional regulator	lmo0833	+	985354	1.2	890	5.71756	7.61175	9.26504	12.8654	5.30753	7.62947	10.5328	8.75671	5.79383	4.68937	7.90321	5.36097	4.32232	2.96749	5.3008	3.9687	4.46564	4.46056	3.94727	2.08238	37.4119	25.196	56.8862	22.9084	11.5607	27.8633	25.9487	18.7491	38.4212	18.164	33.0973	32.2104	20.5746	4.46704	22.7968	6.92492	13.636	5.2772	15.2339	3.8713
	lmo0834	lmo0834	lmo0834	+	985353	1.2	713	5.85704	7.2142	5.62468	6.83814	3.55394	5.58432	5.95582	5.75908	4.3967	4.05729	10.8389	12.3987	3.96904	2.61929	4.94022	3.25241	2.68314	4.33587	3.51843	3.08584	18.2686	17.4678	45.9336	19.0583	3.60664	18.8341	5.71436	6.82412	19.1783	6.18185	11.0139	20.6408	17.775	4.45953	15.8045	3.84071	11.3442	6.58542	11.6987	4.831
	lmo0835	peptidoglycan binding protein	lmo0835	+	985352	5.2	1004	6.96042	10.0798	6.66007	10.4908	7.1156	8.58513	7.73307	8.39288	7.0108	9.58983	14.0134	16.6033	5.71189	4.55591	5.59183	6.35434	4.98552	8.65846	6.31164	5.19235	17.3051	16.133	43.0168	11.2833	12.8117	22.6441	16.239	10.389	29.5212	12.4437	11.7372	14.6642	19.6439	5.54446	17.9652	4.09294	6.71624	8.83735	12.467	6.86434
	lmo0836	phosphate-starvation-inducible protein PsiE	lmo0836	-	985351	1.2	413	129.48	337.382	225.807	180.831	154.903	99.7828	148.407	89.6457	175.75	103.346	214.719	543.966	219.22	81.9348	216.901	108.36	139.713	123.384	179.613	118.343	0	0	0	2.73905	8.29354	2.49861	16.4253	1.6813	0	3.55382	7.1231	0	6.81232	1.92277	0	8.2798	6.52157	1.26194	5.04401	1.66634
	lmo0837	hypothetical protein	lmo0837	+	985348	1.8	1637	55.9355	31.4465	49.7621	36.4167	47.883	37.7898	45.7456	40.005	47.5294	39.3845	57.0788	34.9936	23.2897	24.449	26.2791	20.428	21.6371	19.6406	21.088	24.3181	10.6176	6.09135	15.4718	11.0766	6.81255	18.9455	21.5876	6.37417	13.2363	8.08396	12.0023	18.9417	27.5487	13.6073	30.3122	12.5562	22.2522	14.0339	27.4095	9.2656
	lmo0838	sugar:phosphate antiporter	uhpT	+	985347	5.2	1385	0.658312	1.5485	1.18049	0.30632	0.998628	0.896044	0.952185	0.456431	0.805321	0.562724	2.51517	2.20566	1.78252	0.9771	1.76853	0.609268	1.2759	0.845158	1.7219	0.83667	7.31973	8.09873	9.68022	5.72711	6.19323	14.1804	6.86878	7.03091	9.87974	3.18459	9.21995	7.27532	11.1917	4.59467	8.95588	3.9571	8.76601	3.76943	7.53326	1.99096
	lmo0839	tetracycline resistance protein	lmo0839	-	985342	5.2	1220	1.12091	0.914035	1.52274	0.695429	1.46421	1.23126	1.56124	0.73399	1.42836	0.821273	1.94144	1.04322	1.36877	0.950692	1.17514	1.29675	1.62936	0.890842	1.59453	1.51957	17.8047	6.12877	10.9884	10.2159	8.43618	6.77756	14.4801	5.13066	14.0185	4.21743	18.5166	12.7053	17.3237	8.4753	20.3323	12.914	15.4787	11.1249	13.682	15.255
	lmo0840	lmo0840	lmo0840	-	985341	5.2	470	36.4839	79.4695	23.0534	46.1216	28.7742	25.1187	34.5576	27.758	35.2507	30.7527	50.3289	89.5152	24.8384	20.6747	28.6866	25.8847	21.9016	23.5379	21.7347	21.0505	9.23125	0	3.16508	4.81515	0	4.39247	8.66253	1.47783	4.84548	3.12374	2.08702	4.94052	5.9879	5.07023	11.9792	0	11.4647	1.10922	13.3008	2.92937
	lmo0841	calcium-transporting ATPase	lmo0841	+	985338	3.2	2642	142.289	112.809	62.5243	67.7882	60.6602	71.3737	60.6131	72.2251	64.9835	64.8787	129.126	122.075	62.6565	64.9034	60.8708	62.8022	59.2699	62.6976	63.1129	57.1476	12.0638	7.07835	15.7931	4.7195	4.87163	18.395	4.11659	4.47712	10.7937	7.23672	12.2734	8.51085	12.2714	6.62602	19.213	6.48474	19.4093	7.51148	17.7771	8.61354
	lmo0842	peptidoglycan binding protein	lmo0842	+	985337	1.2	6134	27.6874	30.4914	17.0683	13.7368	17.0521	13.4777	14.7115	11.5489	16.829	10.9331	31.0815	34.9533	13.0523	11.4366	14.8415	9.49743	11.7941	9.7718	12.4277	11.2844	10.1581	7.11527	21.3833	8.50245	5.03696	12.6458	14.1876	5.67286	13.206	5.99544	10.2545	9.10311	19.7674	6.74708	18.5774	4.58162	17.8235	7.91968	14.1257	6.07217
	lmo0843	hypothetical protein	lmo0843	-	985333	1.2	257	7.66245	4.32572	7.49473	1.64558	5.81179	4.56028	4.54687	3.26932	4.05587	3.6708	10.2689	9.1336	4.22465	2.99947	6.25657	2.86391	7.71102	2.27013	5.35538	2.24734	11.2349	9.66825	17.3343	0	3.32706	8.0188	21.0855	2.69791	13.2687	2.85132	26.6702	12.0258	0	3.08537	13.1214	5.31447	10.4648	8.0999	4.04694	0
	lmo0844	hypothetical protein	lmo0844	+	985332	1.1	377	71.0063	154.21	90.3073	148.446	110.459	115.684	134.223	135.421	136.569	167.277	83.9227	140.856	136.293	128.124	145.983	166.711	132.162	151.072	141.558	119.337	0	3.29948	11.8314	2.99991	6.81255	8.20973	0	1.84143	18.1129	5.83841	5.201	2.05201	22.3833	4.21178	29.8529	9.06835	7.14267	8.29275	13.811	3.65009
	lmo0845	hypothetical protein	lmo0845	+	985330	6	1103	29.8906	24.6505	24.7229	23.3303	24.0817	28.0639	30.9477	29.797	22.8745	32.6487	31.1973	29.7097	20.2722	21.9051	22.0403	19.1224	18.354	20.0082	23.267	23.9488	13.1278	5.64857	20.2548	8.21716	3.8876	13.1177	6.1595	3.15245	10.3361	6.66341	12.4654	7.02591	14.0504	10.8156	26.5756	4.96788	15.8963	10.411	22.6981	8.7483
	lmo0846	excinuclease ABC subunit C	lmo0846	+	985329	6	1100	53.1762	48.3437	57.9565	46.7877	54.3708	42.448	50.5436	39.8855	56.3283	41.2889	69.1505	68.3738	31.2831	25.4791	32.9062	19.7977	26.5018	25.4964	27.8368	25.0673	25.0107	13.5935	16.248	4.11977	0.779638	6.57673	6.17628	1.89662	7.25501	4.00894	5.35688	6.34055	17.9311	3.61501	16.3988	1.24535	8.58288	2.8471	5.68997	1.25316
	lmo0847	glutamine ABC transporter	lmo0847	+	985328	3.5.2	1442	150.647	160.989	47.2612	31.3344	46.5203	33.4747	36.7353	21.5913	49.4563	25.7122	127.845	169.615	15.4593	19.5745	21.1713	13.6059	13.123	13.4233	14.058	25.2739	10.0437	10.3718	12.3971	4.71504	4.75887	9.31915	4.71247	1.44711	7.11711	4.07839	8.85575	13.4383	12.704	3.30988	14.0762	3.32569	7.48421	3.98259	13.0242	5.25886
	lmo0848	amino acid ABC transporter ATP-binding protein	lmo0848	+	985325	3.9	728	167.194	146.261	74.5748	49.5028	84.8053	51.1974	57.1259	47.8003	81.1485	52.0416	158.473	170.971	23.2246	35.6501	31.8197	25.122	22.3374	27.9476	30.5835	50.8231	7.95229	6.84337	14.3145	1.55551	0	8.51379	7.46237	0.954815	6.26123	3.02733	2.69681	0	11.6062	5.45971	12.3834	1.88084	5.55541	1.43331	8.5935	1.89264
	lmo0849	amidase	lmo0849	-	985321	3.9	1850	2.99868	3.38572	2.00893	1.68203	2.08749	1.90689	1.74284	1.6234	2.37436	1.44466	2.56131	3.6816	1.96283	1.14972	1.55034	1.34012	1.6719	1.44649	1.79828	1.159	17.2257	10.107	20.1344	15.3156	7.88357	16.7654	16.1644	9.40113	19.111	6.35885	15.9317	18.4382	12.9511	6.88083	12.8024	8.51866	13.1277	7.33848	11.2816	7.08129
	lmo0850	hypothetical protein	lmo0850	+	985319	1.1	146	43.9659	150.674	311.143	138.15	123.973	55.137	142.148	46.2625	176.538	68.216	107.663	510.806	443.398	90.3718	439.237	225.832	208.518	193.809	291.376	119.512	0	0	20.2824	0	0	0	0	0	0	0	0	0	0	0	0	0	0	3.55404	0	0
	lmo0851	lmo0851	lmo0851	+	985315	1.1	758	136.242	199.636	129.536	144.876	143.911	127.8	138.136	126.342	143.842	124.998	166.355	249.467	140.924	117.847	149.266	136.291	127.756	140.057	142.653	125.741	3.81899	0	9.82051	2.98806	1.13094	10.903	3.58371	0.917075	7.51719	0	12.9511	1.02195	3.71581	4.19513	10.4072	8.12925	14.2289	6.19498	6.8782	8.18023
	lmo0852	TetR family transcriptional regulator	lmo0852	+	985313	2.4	554	22.331	27.6882	35.2424	25.3716	44.1623	26.8523	32.762	26.1214	37.2058	26.6001	18.2152	19.6229	34.8263	28.1194	30.9158	25.2002	28.1456	20.1262	27.7243	23.1925	15.6682	13.4833	29.5465	12.2591	10.8264	24.2298	4.90096	10.0333	22.6166	3.97643	14.1692	1.39759	40.653	12.9085	44.731	8.64679	17.0266	17.8854	15.0502	13.673
	lmo0853	SugE protein	lmo0853	+	985304	3.5.2	341	16.0074	22.3408	18.9189	12.414	30.8589	14.9076	23.3675	18.6516	23.4576	16.941	10.3969	15.829	24.8587	15.2736	21.6764	15.5864	17.6667	15.5353	19.4656	15.5973	16.9509	0	21.7946	13.2628	2.50989	21.1725	23.86	12.2116	13.3463	10.755	11.4969	2.26801	12.3697	6.98268	39.5944	8.01833	19.7363	10.6933	36.6355	8.06861
	lmo0854	SugE protein	lmo0854	+	985242	1.2	320	12.7909	16.0465	15.0595	11.4627	24.2541	9.77406	18.0441	18.2295	20.8631	22.9087	12.5975	10.1187	12.2238	10.2459	15.2722	16.1129	15.8384	11.7295	18.5868	13.0051	13.5449	11.6561	27.8645	0	18.7186	16.1126	25.4209	8.67364	14.2194	2.29171	24.4982	7.24917	35.1439	14.879	17.577	12.8143	21.0275	11.3928	22.7688	8.59646
	lmo0855	D-alanyl-alanine synthetase A	ddl	+	985238	1.2	1112	303.594	233.481	173.532	152.073	180.37	136.953	184.975	144.891	184.775	144.605	274.309	207.202	109.616	110.9	120.483	99.5334	98.84	89.384	114.266	103.877	22.1367	4.48232	17.4122	7.13187	8.48355	13.941	7.33163	10.0063	14.3536	7.27048	23.8461	9.75674	29.1406	11.4433	20.2775	11.7033	23.0452	11.2656	20.6383	11.1569
	lmo0856	UDP-N-acetylmuramoylalanyl-D-glutamyl-2,6-diamino pimelate-D-alanyl-D-alanyl ligase	murF	+	985224	1.2	1373	155.722	97.7204	95.2097	74.4679	107.325	82.0619	106.616	83.8343	99.7165	82.5915	140.202	96.2278	60.0773	66.8823	64.9194	62.8033	52.2861	56.6939	64.2209	68.6154	20.0413	11.8003	37.9741	13.2049	11.8699	29.3614	23.7558	11.1451	19.932	11.2434	19.3164	13.5487	32.8419	11.0076	40.2428	10.9771	27.5102	15.9699	28.8764	11.0459
	lmo0857	carboxylesterase	lmo0857	+	985170	2.1.1	713	337.579	282.676	313.628	336.556	300.389	315.743	300.974	374.636	295.751	382.166	442.539	375.618	179.726	239.258	211.006	223.899	177.706	239.235	200.55	248.166	20.2984	3.49357	14.6152	11.1173	4.80886	21.7316	13.3335	6.82412	6.39277	17.5152	13.7673	16.2954	21.725	10.0339	22.1263	6.72125	13.235	6.58542	17.5481	5.7972
	lmo0858	LacI family transcriptional regulator	lmo0858	-	985100	6	1025	28.9763	30.7082	17.4692	24.966	15.9635	19.3671	20.0803	19.6792	18.2221	18.7871	35.6077	39.6035	23.3714	14.8336	21.3268	18.8272	21.9757	19.9391	21.8528	14.9757	2.82516	3.6468	8.71785	0	0	6.04927	6.62777	2.71368	4.44877	0	0.958078	2.26801	9.6209	2.32756	1.09984	1.33639	7.89453	2.03682	7.12356	0.672384
	lmo0859	sugar ABC transporter substrate-binding protein	lmo0859	+	985026	5.2	1319	0.74883	0.325185	0.788781	0.589666	0.65535	0.445664	0.610985	0.279564	0.422793	0.464248	0.68664	0.434239	0.605533	0.537405	0.951125	0.599748	0.893129	0.792336	1.47494	0.483177	9.88163	2.83456	14.6817	1.71813	3.25144	17.2404	7.21221	5.8005	14.6961	0.557303	10.4256	8.81433	17.0927	4.22135	17.9525	5.19369	12.2724	8.3116	13.4469	10.4525
	lmo0860	sugar ABC transporter permease	lmo0860	+	984935	2.1.1	878	0.259505	0.0976666	0.338433	0	0.262438	0.371809	0.083411	0.119949	0.476184	0.253514	0.237954	0.217366	1.24	0.660293	0.476103	0.180129	0.670609	0.618725	0.500145	0.0659628	11.5417	11.3511	32.2233	6.45033	9.76543	24.7132	32.4919	6.33502	23.3674	9.20596	13.4196	13.2365	33.6896	10.8672	26.9593	12.479	24.5727	10.6985	23.7568	10.9876
	lmo0861	sugar ABC transporter permease	lmo0861	+	984876	3.6	833	0.364677	0.102936	0.356694	0	0.484047	0.156748	0.527469	0.189632	0.501877	0.133596	0.33439	0.840014	0.958397	0.69592	1.00359	0.69611	1.59028	0.551785	0.67774	0.625697	8.68888	7.47724	16.0873	2.71935	5.14617	16.1241	13.0457	6.67683	24.6283	10.5847	9.42915	7.44039	20.2899	15.2715	21.6487	4.93214	22.6613	8.1436	16.2751	11.5805
	lmo0862	oligo-1,6-glucosidase	lmo0862	+	984847	5.2	1532	0.396791	0.224003	0.630672	0.138473	0.564293	0.127914	1.05219	0.137555	0.500567	0.254382	0.773155	0.581629	2.03819	0.462736	1.79394	0.413134	1.49	0.491217	1.39291	0.453865	7.56324	4.88143	6.80709	2.95882	4.47948	15.5198	9.75877	4.99456	9.67673	4.31883	11.5419	6.07171	22.9966	5.71186	24.2913	4.47206	13.2091	8.86075	19.0705	7.20017
	lmo0863	lmo0863	lmo0863	+	984720	6	914	1.32958	0.281472	0.975354	0.386666	0.69331	0.642925	1.9231	0.518535	1.2961	0.669734	0.380986	0.417628	1.19121	0.563835	0.784066	0.519126	1.28845	0.27433	1.51004	0.76041	26.927	14.9937	39.1017	11.1538	15.0099	30.524	40.1317	9.88938	32.425	12.0597	36.5263	21.1929	27.7406	17.3995	38.2313	11.2388	28.0321	9.7066	20.5399	22.6186
	lmo0864	lmo0864	lmo0864	+	984716	5.2	1067	0.711939	0.321532	0.348178	0.198764	0.755984	0.367214	0.48055	0.296167	1.3717	0.156488	0.652813	0.238533	1.83701	0.422678	1.17555	0.741262	1.03488	0.783433	1.76416	0.325737	50.21	37.3694	58.6251	29.7295	28.1305	58.1138	34.3825	22.811	40.6013	17.22	48.7813	45.7553	58.096	23.851	61.2824	19.8994	39.1844	20.0563	40.0829	25.1917
	lmo0865	phosphomannomutase	lmo0865	+	984615	5.2	1673	2.49817	1.64108	2.26578	1.81761	3.03168	2.2647	3.15347	2.26743	3.79226	2.29628	3.49851	3.46215	4.99185	3.50565	5.32136	4.76072	5.54604	3.89863	6.00277	5.09154	37.2283	29.8018	34.7308	28.4508	29.228	48.199	41.4342	34.0961	40.9	38.2322	41.1047	36.6053	36.2225	25.6783	33.0308	23.7532	24.1929	24.3432	33.0573	23.4901
	lmo0866	ATP-dependent RNA helicase	lmo0866	+	984613	5.2	1562	980.089	816.581	1167.95	1161.13	1580.5	1011.32	1227.13	1188.09	1315.95	1326.23	849.179	661.372	991.772	967.205	892.912	955.167	891.599	719.097	825.372	1020.07	25.036	13.5652	8.58399	6.52956	6.04107	11.9128	8.70133	3.11735	16.0617	8.47186	20.1252	13.8954	15.3375	6.11152	19.4932	8.77245	11.2281	7.6879	17.3684	9.26884
	lmo0866a	hypothetical protein	lmo0866a	+	16695799	1.2	176	0	0	0	0	0	0	0	0	0	0	0	0	0	0	0	0	0	0	0	0	0	0	0	0	0	0	0	3.93254	0	0	0	0	0	0	0	0	0	0	0	0
	lmo0867	lmo0867	lmo0867	+	984585	3.5.2	488	499.748	428.718	360.751	349.893	353.809	299.953	374.388	312.857	394.17	348.613	538.658	470.694	185.895	253.471	219.212	223.415	173.585	225.432	199.586	274.255	521.631	374.926	158.526	108.991	86.0137	141.731	133.499	74.0186	126.012	76.7232	355.806	320.416	124.001	65.1146	99.2289	63.089	85.5806	77.9926	79.0022	55.02
	lmo0868	lmo0868	lmo0868	-	984573	1.2	557	15.8066	21.693	8.3967	7.7354	6.09781	4.21704	4.33602	2.83429	4.5007	3.69401	18.867	31.0452	4.81822	1.73356	4.60709	2.08085	1.84868	2.92397	4.27697	2.70164	132.463	109.522	285.861	60.966	26.1514	113.082	148.676	33.6803	96.115	26.367	96.8895	79.2342	126.357	45.6502	131.449	46.6874	79.8366	44.0051	69.2331	48.2165
	lmo0869	lmo0869	lmo0869	+	984542	1.2	998	35.8484	37.8973	53.5261	66.6517	37.8122	79.3005	63.4838	71.5569	38.8957	52.1407	26.7994	27.3496	47.497	34.6005	38.959	38.7249	45.7293	38.4433	44.0068	31.5734	159.583	107.367	77.5968	49.9445	50.6952	73.5177	89.851	51.56	55.9704	50.81	117.093	83.8552	74.8127	36.6538	65.5151	35.6852	47.2961	39.7454	78.3867	33.8373
	lmo0870	lmo0870	lmo0870	+	984493	1.2	311	87.0017	93.8285	83.4287	108.181	57.6708	151.469	119.142	116.418	78.0338	92.1353	56.5361	55.5232	82.9114	66.5555	81.4379	75.4452	82.6573	81.123	73.07	75.8216	227.615	155.901	109.895	109.035	68.7805	106.095	113.335	107.086	131.667	73.0924	138.627	116.846	85.8745	56.13	86.8031	52.7359	64.9022	45.2114	83.6627	44.2222
	lmo0871	hypothetical protein	lmo0871	-	984472	2.1.1	353	94.7217	94.8219	72.69	103.541	66.6309	117.988	92.5798	114.669	77.0523	105.597	97.2934	84.1981	74.9219	73.0507	78.3623	80.2104	89.9184	90.4068	85.1579	73.2136	94.1639	59.894	109.49	83.2858	67.8946	93.5074	126.781	82.5834	58.0225	41.5616	44.4289	26.2936	99.5868	22.4866	98.8183	40.6692	53.3885	41.3232	67.8377	21.4365
	lmo0872	antibiotic resistance protein	lmo0872	+	984428	2.1.1	1166	6.05935	3.60463	5.92672	2.60726	6.07841	3.2486	6.97371	4.42703	6.15713	3.10294	5.7951	3.00159	4.35859	2.59723	3.94468	3.12054	4.29345	2.83204	4.57441	2.23578	9.93526	4.27491	14.0517	4.85847	3.67773	14.1824	9.32317	2.98226	13.6894	2.52147	10.9502	5.98196	13.2919	6.82113	22.24	7.63699	15.0382	4.02913	18.7886	2.36458
	lmo0873	transcriptional regulator	lmo0873	+	984373	5.2	2018	0.866175	0.255123	0.442025	0.490658	0.428461	0.194247	0.399455	0.0783325	0.345522	0.469076	0.552514	0.851701	0.323911	0.35135	0.50339	0.209125	0.401443	0.352254	0.466597	0.25846	7.17833	4.94187	10.3371	5.61648	5.95212	6.66049	8.75692	4.48181	12.4341	2.55051	5.35556	4.22599	16.0641	4.33694	13.9728	4.75381	9.36083	3.88145	16.0314	4.44193
	lmo0874	PTS sugar transporter subunit IIA	lmo0874	+	986569	1.8	329	0.230409	0.780445	0.901464	0.428848	0.17476	0.198073	0	0.319502	0.211397	0.506452	0.422548	0	0.220194	0	0.5435	0.159933	0.223282	0.507095	1.14189	0	8.78367	11.3382	9.03487	3.43627	0	9.40387	16.4851	4.21854	3.45791	0	0	2.35049	29.9123	2.4122	10.2586	0	0	3.16632	12.6559	8.36202
	lmo0875	PTS beta-glucoside transporter subunit IIB	lmo0875	+	986563	6	335	0.226295	0.766509	0.442683	0.210595	0.343279	0.583608	0.654627	0	0	0.165803	0.830005	0.189549	0.865047	0.383861	1.06759	0.314154	0.657885	0.49804	0.186917	0	4.31341	3.71192	17.7471	0	2.55471	6.1573	4.04767	0	23.7731	4.37881	5.85112	9.23406	25.1812	4.73825	23.5092	4.08076	8.03551	7.77445	9.32241	4.10635
	lmo0876	PTS sugar transporter subunit IIC	lmo0876	+	986296	5.2	1325	0.34405	0.323714	0.897385	0.106727	0.5654	0.147882	0.38705	0.198785	0.36827	0.210067	0.630954	0.432274	0.712392	0.291804	0.495954	0.358221	0.55568	0.2524	0.426271	0.306085	26.2318	20.6927	21.3607	13.6829	3.88408	21.063	19.4874	7.34905	21.5141	7.21216	30.3941	15.209	28.7134	10.2055	29.7854	12.4085	19.3434	11.032	33.0714	17.6889
	lmo0877	glucosamine-6-phosphate isomerase	lmo0877	+	986454	5.2	728	0.625803	0.471051	1.02017	0.194129	1.26575	0.268988	1.40803	0.650837	0.861246	0.0764194	1.05202	0.262092	1.19611	0.442309	1.64019	0.941168	1.61719	0.401711	1.20611	0.318141	27.833	10.2651	16.3594	10.8886	11.7748	22.7034	11.1936	9.54815	12.5225	12.1093	28.3165	15.9601	25.1467	7.6436	23.2189	13.1659	27.7771	11.4665	31.5095	6.62423
	lmo0878	oxidoreductase	lmo0878	+	986549	2.5	953	1.83313	0.629919	1.48118	0.81589	1.81355	1.16477	1.22966	0.663117	2.12061	1.05113	1.68089	1.00139	1.59952	0.608383	2.00537	1.05113	2.54879	0.920903	2.2383	1.15476	27.3454	20.9175	10.9384	8.32052	10.7972	28.1919	12.8304	13.1332	14.3536	10.7956	19.5773	20.3265	17.7377	12.5161	23.657	11.498	18.3958	8.21452	15.3224	10.1238
	lmo0879	lmo0879	lmo0879	+	986553	2.4	767	2.4751	1.34139	3.29245	1.93484	2.70332	0.936204	2.38666	1.16693	4.90506	1.88601	3.35892	1.90733	3.78458	3.19084	4.04794	2.19908	4.22143	2.34234	5.72432	2.26489	9.43558	4.87189	7.76434	4.42956	5.58842	21.5505	14.1669	2.71898	1.48582	1.91573	11.5194	9.08978	18.3613	6.21895	20.5705	6.24866	19.3354	6.12238	17.6737	4.49132
	lmo0880	wall associated protein precursor	lmo0880	+	986636	2.2	1388	4.43401	4.07922	4.22987	2.69998	4.15196	4.42349	3.58937	3.56765	4.16858	2.92787	5.57161	1.78823	270.306	239.569	268.882	278.936	258.554	264.927	275.225	170.229	3.13025	4.48958	10.7326	2.44917	3.08993	3.72363	5.87481	6.01348	11.5015	3.70733	5.66156	5.02588	7.10658	2.86546	10.5614	3.94855	9.71897	4.88968	4.5102	4.46998
	lmo0881	lmo0881	lmo0881	-	986550	5.2	476	20.7223	24.1169	12.0053	16.7628	22.7298	18.4993	15.8318	15.2517	23.1074	16.9348	20.6092	16.1557	9.44479	11.7621	13.7869	10.1794	10.0407	9.38444	10.2698	11.4261	3.03838	0	3.12527	0	1.79954	2.16861	2.85119	1.45925	2.39226	0	4.12154	1.62612	32.5192	11.6817	52.0455	12.9352	28.3012	23.0006	48.156	7.2313
	lmo0882	hypothetical protein	lmo0882	+	986548	5.2	482	79.6558	81.4054	42.8055	49.6638	46.0889	50.4778	51.004	58.6117	43.4742	61.7075	77.8039	63.6883	22.1151	26.7034	26.4886	26.3343	18.1538	24.5988	25.6157	27.0099	12.0025	12.911	9.25934	4.69552	15.9947	6.425	22.5262	10.0878	33.0756	4.56919	18.3166	8.02962	20.4369	11.5366	16.3542	7.09697	16.7698	8.6533	19.4555	9.99806
	lmo0883	hypothetical protein	lmo0883	+	986544	4.1	1475	90.8197	89.5133	62.4291	71.1914	56.6549	68.2426	69.1953	77.7551	66.8306	81.7906	91.26	72.836	34.9535	41.7254	39.1276	41.0137	33.397	38.4624	35.657	37.1221	14.7287	7.60491	29.2899	3.84135	2.9078	21.7257	17.507	3.3011	24.7395	4.98401	15.9836	5.25516	20.0631	12.9435	35.1682	13.4698	30.1821	8.49501	19.807	7.94561
	lmo0884	protoporphyrinogen oxidase	lmo0884	+	986422	4.1	1379	89.8646	69.5501	73.724	63.2737	70.4169	65.0325	86.2286	70.7106	66.6267	70.162	74.2674	69.3187	61.7117	41.497	58.572	45.1289	57.5583	41.4109	56.5691	38.3601	17.8538	9.03771	18.3644	8.21716	8.0862	20.9883	18.7249	6.05269	20.6723	7.99609	22.0816	10.1173	43.9394	9.22929	31.073	9.43897	17.6082	8.70739	18.1584	9.99806
	lmo0885	4'-phosphopantetheinyl transferase	acpS	+	986540	4.1	356	81.9986	54.8279	66.0379	60.4532	67.0403	50.8997	71.8806	57.5908	59.7951	55.0855	59.3697	50.4868	54.9559	33.4185	56.7706	35.9244	45.8198	33.9839	44.1563	31.3456	0	10.4807	12.5273	0	0	8.69265	0	0	9.58916	0	8.26041	0	3.95	4.45953	22.1263	0	7.56283	2.92685	17.5481	5.7972
	lmo0886	alanine racemase	dal	+	986294	4.1	1106	77.8896	51.4939	69.668	54.5881	58.348	49.3626	71.2651	53.2416	55.8969	47.5571	64.241	54.5407	57.3041	32.856	48.8217	34.8038	49.7211	34.6927	48.1667	28.7026	13.0922	6.75992	14.8133	7.17053	3.10165	13.0822	23.3427	3.77268	16.493	3.32267	19.5355	10.5103	20.3816	5.03359	21.4067	9.28953	31.7065	8.96696	16.0342	5.60867
	lmo0887	hypothetical protein	lmo0887	+	986567	4.1	278	335.208	179.698	316.142	138.984	343.958	164.699	337.159	150.595	268.792	135.381	217.658	139.019	125.274	60.0969	125.784	59.777	146.574	71.9748	129.435	54.864	20.7786	4.47027	5.3432	0	6.15327	11.1229	0	2.49484	12.27	7.91011	10.5698	2.78015	10.1086	2.85314	20.223	2.45723	0	3.74511	14.9693	0
	lmo0888	hypothetical protein	lmo0888	+	986538	4.1	347	131.532	122.853	178.661	199.266	150.972	111.382	195.094	131.491	163.176	132.711	81.1401	61.4922	68.4878	35.5799	59.6132	50.0479	51.4511	34.983	49.0881	34.3222	37.482	17.9196	8.56755	13.0341	2.46661	17.8349	7.81619	4.00034	13.1162	0	22.5974	22.2891	20.2608	4.57486	19.4559	3.94004	7.75842	3.00255	21.0022	5.94712
	lmo0889	positive regulator of sigma-B activity	RsbR	+	986201	3.5.1	836	298.69	316.523	301.481	272.134	275.194	232.171	327.26	243.875	273.959	238.081	214.159	186.195	130.917	84.5209	119.927	93.8903	100.973	81.5214	107.9	72.9442	6.92619	0	7.12427	1.3548	3.07664	11.1229	4.87462	2.49484	4.09	0	9.39535	3.70686	20.2172	2.85314	17.5266	4.09538	14.5158	4.3693	7.48466	0.824213
	lmo0890	negative regulation of sigma-B activity	rsbS	+	985149	4.1	356	212.983	207.769	261.443	170.062	230.683	179.065	267.191	172.477	212.409	172.435	144.714	132.907	98.7171	66.6563	101.651	64.3091	87.718	60.9366	84.7941	57.3316	0	0	8.35156	6.35276	4.80886	0	7.61915	7.79899	3.19639	2.06062	11.0139	0	11.85	4.45953	34.7699	0	3.78141	1.46343	20.4728	1.9324
	lmo0891	positive regulation of sigma-B activity	rsbT	+	986533	1.2	410	433.825	434.676	492.367	450.556	401.731	423.515	526.072	384.801	410.079	359.199	282.614	245.456	209.152	147.335	198.556	150.757	168.7	129.069	180.007	115.257	3.52629	6.06912	10.8814	5.51809	10.4426	7.55055	13.2362	3.38715	11.1057	7.15951	2.3917	3.77451	44.6033	9.68401	35.6928	15.0124	26.2767	7.62691	38.1062	8.39253
	lmo0892	serine phosphatase	rsbU	+	986534	5.2	1004	339.094	321.015	426.318	365.769	349.468	345.161	431.155	345.315	364.839	290.91	253.699	227.63	177.864	120.122	160.141	133.389	142.161	114.558	144.793	105.001	15.863	17.374	17.8	6.76996	11.1034	20.5856	20.2988	9.00376	17.0315	9.51574	24.4524	18.5232	37.8846	22.9699	40.4218	8.86803	51.0435	22.8731	14.5448	12.3558
	lmo0893	anti-anti-sigma factor (antagonist of RsbW)	rsbV	+	986526	5.2	344	135.1	135.616	166.634	127.368	138.577	130.728	159.387	131.718	125.165	110.451	91.748	93.5941	515.387	302.255	392.501	311.16	394.258	282.298	416.508	199.993	16.8035	7.23017	12.9631	3.28686	2.48806	5.99667	11.8262	4.03513	16.5378	8.52916	8.54773	8.99317	8.17478	2.30732	19.6251	7.9486	19.5647	3.02866	6.05281	1.99961
	lmo0894	serine-protein kinase RsbW	rsbW	+	986524	5.2	473	180.463	169.887	240.685	173.018	168.146	195.127	231.556	178.84	180.731	150.91	138.264	131.004	635.273	346.66	497.704	360.648	504.9	349.599	534.099	242.078	0	0	6.2901	0	3.62186	4.36467	2.86924	2.93696	7.22221	0	2.07382	3.27283	8.925	1.67938	11.9034	4.33903	14.2401	5.511	15.4194	1.45541
	lmo0895	RNA polymerase sigma factor SigB	sigB	+	986527	1.2	779	347.324	314.229	376.907	322.865	287.689	338.804	406.54	303.33	305.249	273.978	266.099	210.825	1138.22	721.198	957.25	722.177	974.695	713.078	1008.89	511.87	3.71617	0	9.55611	4.36141	2.20098	7.95712	6.97445	3.56954	20.4815	2.82938	0	5.96662	27.1183	6.12328	34.7213	10.5472	24.2301	8.03759	16.0632	7.96
	lmo0896	indirect negative regulation of sigma B dependant gene expression (serine phosphatase)	rsbX	+	986520	3.5.2	599	301.352	343.396	490.351	375.263	381.492	313.53	437.465	280.459	373.105	269.821	291.547	273.754	1298.5	619.198	1106.72	727.454	1120.35	780.02	1156.12	515.163	2.41551	2.07867	0	1.88995	2.86127	3.44809	2.2667	1.1601	0	0	3.27663	1.29277	14.1015	1.32671	18.8073	0	11.2497	1.74148	12.1813	2.29955
	lmo0897	transporter	lmo0897	+	984941	5.2	1625	30.6291	13.1466	7.63832	4.83047	7.6256	4.58272	8.34187	4.4742	6.56422	5.13927	23.3259	11.0064	4.24543	2.93491	3.05176	2.59669	3.80651	2.90738	3.82386	2.31782	2.674	0.767038	3.66729	4.88178	0	6.36178	5.85493	1.71232	6.31611	4.52423	4.83635	0.954072	13.0088	4.40605	11.798	4.63791	9.13261	4.49828	17.9798	2.54563
	lmo0898	hypothetical protein	lmo0898	+	986364	6	2177	218.435	147.26	150.859	141.325	150.082	131.628	153.504	135.885	158.067	138.302	213.739	154.425	142.259	119.354	136.204	119.78	139.213	115.345	136.796	114.046	7.31973	4.00846	14.3737	3.64452	2.7588	10.9237	8.74208	4.47421	13.0981	3.37759	8.12387	7.12269	16.8337	8.04067	25.9054	10.0726	15.4955	5.51708	20.1344	6.96835
	lmo0899	hypothetical protein	lmo0899	+	987820	6	467	101.543	74.6593	80.0916	77.2614	88.3546	74.4424	85.8513	76.0353	85.7105	76.3033	92.9605	62.0553	72.0429	55.1185	67.7052	61.3486	76.9894	58.194	74.3448	55.999	15.484	0	28.6683	7.26902	5.50244	22.1031	11.6241	8.92384	19.5062	6.28752	6.30121	8.28698	48.2102	8.50455	53.0464	10.2542	20.1918	20.094	31.2341	7.37037
	lmo0900	lmo0900	lmo0900	+	987809	4.1	392	225.01	380.532	116.382	201.837	149.973	162.163	158.576	142.19	178.041	159.191	281.72	397.687	143.664	148.504	156.08	193.653	162.74	172.77	172.431	180.288	3.6878	3.17355	0	0	2.18418	5.26425	3.4606	0	8.71076	0	7.50373	0	3.58817	6.07653	20.0995	3.48889	13.7401	2.65874	7.97031	3.51077
	lmo0901	PTS cellbiose transporter subunit IIC	lmo0901	+	986930	2.1.2	1286	2.30409	1.60091	2.65816	1.09961	2.55418	1.92994	2.22176	1.55655	2.4934	2.07775	3.68375	2.82069	3.27468	2.85614	2.3691	2.99361	3.32061	2.56798	3.41591	3.87443	12.3872	5.81447	10.4248	10.5731	8.00355	13.6637	4.22694	4.32671	15.9596	8.0023	15.2757	13.2592	25.2008	12.3703	31.5648	14.9152	18.8806	15.0197	20.2819	15.5448
	lmo0902	GntR family transcriptional regulator	lmo0902	+	986980	5.2	713	174.859	200.555	80.2037	104.554	99.1873	108.757	90.2615	103.368	100.44	94.7221	183.089	242.533	131.691	119.674	127.441	129.357	130.751	125.389	138.45	129.768	4.05968	5.24035	4.17578	3.17638	2.40443	5.7951	7.61915	0	4.79458	1.03031	4.1302	7.60452	9.87499	0	4.74135	2.88053	3.78141	1.46343	8.77404	1.9324
	lmo0903	hypothetical protein	lmo0903	+	986912	3.5.2	380	42.5078	70.7522	182.316	88.4035	94.1502	52.8402	80.2459	41.2333	91.3666	53.0778	301.939	490.45	545.647	625.59	753.824	641.091	729.289	612.377	732.383	875.502	3.80395	6.547	0	0	2.25297	5.43006	14.2784	3.65386	11.9802	0	15.4801	6.10757	37.0118	4.17861	26.6561	10.7963	14.1729	6.85621	13.7022	7.24269
	lmo0904	lmo0904	lmo0904	+	986917	5.2	674	51.1406	64.8637	27.5447	39.7304	32.0393	31.4716	31.6083	33.1146	33.7953	30.9498	94.8197	119.451	176.331	151.047	193.438	193.988	182.188	189.406	187.574	142.677	12.8827	1.84771	8.83409	3.3599	2.54335	6.12993	2.01484	3.0936	3.38107	4.35935	5.82512	2.29825	4.17822	4.71719	15.0459	8.12524	3.9999	1.54798	9.28098	4.0881
	lmo0905	lmo0905	lmo0905	+	986916	5.2	497	35.7273	33.9603	77.3575	49.3046	101.792	65.7578	92.1631	61.7158	87.6914	56.4928	45.0802	71.3616	206.319	110.589	184.637	125.692	189.386	121.642	193.582	98.0326	8.73076	2.50443	5.98696	2.27704	10.3419	24.9259	8.19288	4.19313	16.0397	2.95438	3.94774	3.1151	16.9898	3.19689	9.06378	2.75328	13.5539	5.24541	16.7729	6.92637
	lmo0906	glutathione reductase	lmo0906	+	986897	1.2	1349	73.3879	79.9985	137.007	103.047	170.962	141.186	179.494	137.73	154.869	128.009	83.5612	117.564	260.406	176.555	251.097	197.428	255.653	187.608	276.012	160.973	17.177	6.46699	9.93835	3.3599	1.90751	7.66241	13.0965	5.156	21.1317	3.26951	9.46581	5.74564	10.4456	4.71719	18.3894	6.60176	10.9997	6.19192	27.0695	7.15417
	lmo0907	phosphoglycerate mutase	lmo0907	+	986931	2.1.1	674	206.703	254.113	309.272	338.914	340.13	384.728	371.153	377.459	362.033	353.736	193.358	274.473	422.312	357.028	378.904	365.692	411.861	354.082	425.95	311.896	36.501	14.7817	13.2511	20.1594	13.9884	18.3898	6.04452	12.3744	18.5959	15.2577	13.1065	10.3421	16.7129	7.07579	25.0765	7.10958	17.9995	6.19192	20.1088	13.2863
	lmo0908	hypothetical protein	lmo0908	-	986924	1.2	1136	154.009	217.907	78.2953	78.6014	76.9958	71.1129	59.3897	71.8204	71.847	68.008	186.105	210.39	92.4756	78.1577	89.2306	76.9154	81.2005	91.9494	89.3175	73.1268	35.6909	28.5201	64.2453	71.808	55.1115	39.1208	51.4343	39.1802	43.1554	28.468	11.2391	23.877	54.5704	17.5028	29.7742	14.4711	42.743	11.9468	30.304	13.3483
	lmo0909	GntR family transcriptional regulator	lmo0909	+	986502	1.2	392	17.993	16.6018	58.6639	54.7354	46.0779	68.3578	81.1538	65.7295	55.7377	55.2845	16.3213	17.9883	68.2264	41.1874	51.4181	43.5115	53.0593	45.0289	62.4843	40.8672	14.7512	12.6942	26.5529	5.77083	6.55253	23.6891	34.606	14.1692	20.3251	3.74372	27.5137	13.8158	28.7053	10.1276	20.0995	3.48889	30.9152	11.9643	7.97031	17.5538
	lmo0910	lmo0910	lmo0910	+	984497	1.2	1103	20.7306	27.2166	68.9816	50.2498	44.9247	56.2462	63.755	50.6645	44.9275	42.4383	20.7772	27.6329	71.4134	39.6044	56.8607	41.7346	55.2623	46.1553	57.3996	42.278	9.18944	9.03771	16.2038	8.21716	3.8876	21.5505	17.2466	3.78293	22.7395	5.99707	15.1366	14.0518	15.3277	6.48934	26.5756	3.72591	23.2331	8.04487	17.0235	7.49855
	lmo0911	lmo0911	lmo0911	+	986500	2.1.1	503	256.166	242.387	125.427	134.079	133.879	163.151	140.381	137.652	140.352	132.753	295.62	214.443	1404.98	1609.78	1474.7	1665.75	1560.21	1744.72	1642.25	1572.05	5.75121	7.42384	14.7892	0	1.70314	8.20973	2.69845	0	9.05643	1.4596	7.8015	1.53901	19.5854	11.0559	13.4338	9.52177	16.071	5.18297	22.7881	5.47513
	lmo0912	formate transporter	lmo0912	+	986984	3.5.2	812	675.431	455.327	40.6158	55.0065	42.8452	72.3587	44.4599	74.8294	41.7021	68.5236	1000.01	597.636	93.4889	113.509	93.6852	115.553	102.594	144.648	109.617	105.978	5.34799	9.20446	1.83364	1.39479	1.05582	7.63414	13.3827	1.71232	8.42147	0.904846	16.9272	6.67851	17.345	6.85385	24.9839	4.21628	11.6233	8.35395	16.6955	8.48544
	lmo0913	succinate semialdehyde dehydrogenase	lmo0913	+	986938	1.2	1466	143.933	110.135	108.895	193.034	91.5971	299.819	145.437	242.746	96.9139	168.306	88.303	76.8428	6885.49	8199.2	6478.42	9107.18	7683.89	9151.64	7836.02	7133.43	5.92763	1.70035	14.2267	3.86492	2.34051	9.16669	12.052	2.84687	7.77853	4.01167	4.69047	3.70118	19.2249	11.3951	32.3071	23.8336	39.5695	23.8607	38.4335	11.7564
	lmo0914	PTS sugar transporter subunit IIB	lmo0914	+	987760	5.2	305	0.248481	0.561104	0.972167	0	0.5654	0.213608	0.958408	0.516841	0.68393	0.364116	0.455689	0	3.56196	2.73971	3.71214	2.9321	7.46463	3.82807	2.87338	2.46326	0	4.07583	24.3587	0	0	30.4243	17.778	0	18.6456	4.8081	3.21238	12.6742	9.21666	5.20278	7.37543	8.96166	4.41165	3.41466	6.82425	6.7634
	lmo0915	PTS sugar transporter subunit IIC	lmo0915	+	987872	5.2	1268	0.479339	0.270604	1.0549	0.111521	1.22704	0.463575	1.09775	0.290799	0.714651	0.175602	0.43953	0.45169	5.38251	1.72783	3.76895	4.2006	4.35479	3.56045	4.05825	2.28453	20.5575	12.7767	22.3202	13.4039	12.1756	26.0848	25.7214	9.32468	20.6821	12.1737	13.1685	11.6135	32.2256	7.52743	29.3448	14.5865	24.4675	10.7041	19.7468	15.7653
	lmo0916	PTS sugar transporter subunit IIA	lmo0916	+	987774	2.5	350	0.649872	0.244584	0.423765	0.40319	1.47874	0.372445	0.835535	0.150193	1.19249	0.476151	0.397267	0.725793	6.21059	2.5722	5.28016	3.90947	3.35877	3.33729	4.65214	2.47783	8.25815	3.55329	38.2244	3.23068	2.44553	23.5767	3.87469	1.98308	6.50205	4.19168	0	0	8.03504	2.26788	22.5045	5.85955	7.69211	5.95377	5.94935	7.86172
	lmo0917	beta-glucosidase	lmo0917	+	987667	1.2	1451	1.30914	1.12337	2.76585	1.07212	2.38309	0.990364	2.07028	0.653526	2.06592	0.997557	1.53654	1.71064	6.40564	2.9313	6.09379	5.4886	5.42982	4.52352	6.315	3.23449	11.9777	13.7433	10.2669	9.37163	7.09406	9.26139	13.1131	6.71132	12.5742	3.03983	8.12387	6.41042	20.3947	6.57873	22.5377	5.66584	15.8054	8.27562	12.9435	8.07695
	lmo0918	transcription antiterminator BglG	lmo0918	+	987658	1.2	1898	5.28522	11.5279	7.08852	6.89341	8.1389	6.19564	5.75272	4.77486	7.12671	4.22443	6.86557	14.9914	6.27535	3.05633	6.39092	3.14054	4.73372	3.74513	5.39075	5.09893	19.0799	11.1651	16.4854	11.3456	5.87623	15.2522	18.6206	4.76502	17.4261	6.19813	17.0819	18.789	25.9901	7.54527	18.4211	8.30334	25.5918	6.05253	18.6939	3.99607
	lmo0919	antibiotic ABC transporter ATP-binding protein	lmo0919	+	986830	5.2	1571	62.7821	33.4767	54.7846	34.1196	51.4341	38.7943	52.8432	31.9928	55.2939	33.7377	28.6066	27.6307	28.7975	29.2496	31.2997	27.6983	28.1233	25.016	32.0012	30.1709	15.6732	8.72726	12.3281	7.93489	6.55253	9.87047	11.247	6.19901	10.8885	3.27575	12.5062	5.92108	15.2497	5.57016	15.7924	4.79723	4.29378	5.31749	9.96289	2.63308
	lmo0920	hypothetical protein	lmo0920	+	986844	3.5.2	1040	115.477	88.8178	51.1522	40.308	59.5544	45.3341	42.0471	45.3241	52.0024	48.4316	120.42	122.115	25.4777	27.1955	29.232	21.9527	24.4903	25.7201	24.8561	27.1248	11.1378	8.38658	17.1845	6.53584	2.47372	18.88	10.4516	5.34916	14.2502	1.41333	8.49846	5.21578	32.5106	8.41142	22.7639	9.87849	23.3423	8.02987	21.0627	8.61504
	lmo0921	hypothetical protein	lmo0921	+	986853	5.2	839	170.264	144.717	103.145	79.268	93.6464	69.566	84.4905	69.4117	91.6027	66.4537	186.004	198.799	54.7575	41.0731	57.721	30.9127	45.4379	43.9769	48.8974	40.0347	10.3522	0	12.4229	4.04988	2.04376	14.7775	11.3335	3.31457	6.79232	4.37881	8.19157	3.69362	26.86	4.73825	6.71691	7.34536	17.6781	8.08543	21.1308	5.74889
	lmo0922	pantothenate kinase	lmo0922	+	986345	3.2	920	740.867	678.123	475.375	563.006	528.555	542.287	464.667	572.855	552.785	578.692	853.829	711.567	215.625	257.464	243.879	233.689	210.409	248.241	226.462	344.299	6.29449	2.70837	14.5676	1.23124	2.79603	7.86208	8.86005	1.51153	12.3899	2.39622	6.40383	1.68439	12.2489	1.72861	12.2523	7.44373	19.0549	3.9708	7.93569	2.24712
	lmo0923	ABC transporter ATP-binding protein	lmo0923	+	986349	1.8	473	23.5805	24.2695	55.2289	66.4307	41.9756	85.2215	74.5557	84.5264	39.59	72.3991	18.3862	25.5291	42.1573	31.1559	46.6676	45.3177	44.3031	50.7496	50.7466	34.7398	9.17282	0	18.8703	4.78467	3.62186	24.0057	2.86924	4.40544	19.2592	10.8639	12.4429	6.54566	29.75	6.71752	21.4261	7.23172	2.84803	8.81761	11.0138	17.465
	lmo0924	pseudo	lmo0924	+	985961	5.2	266	22.4973	21.5426	40.9457	47.7033	33.6953	67.0777	45.0344	61.2079	33.7047	51.954	16.9731	18.6056	32.6579	28.9836	32.2436	34.5922	36.7036	38.7016	33.1661	29.7507	10.8562	23.3559	27.9167	0	6.42982	11.6228	20.3748	0	4.27382	0	11.0448	17.4306	21.1258	8.94411	46.4901	7.703	20.2242	11.7403	31.2842	18.0864
	lmo0925	hypothetical protein	lmo0925	+	986858	2.4	1115	24.8681	25.2316	48.181	58.1423	36.2768	72.2753	61.9526	63.677	36.0681	53.1139	20.3039	21.0012	46.4893	27.9104	45.7494	33.6246	45.7548	40.7857	46.1463	29.8739	31.1679	14.5284	24.0444	8.1288	5.38411	22.2457	13.4052	11.8505	12.27	7.91011	15.8547	8.34044	20.2172	11.4126	16.1784	5.52877	16.935	7.49023	21.5184	11.1269
	lmo0926	TetR family transcriptional regulator	lmo0926	+	984510	5.2	656	23.0304	37.2404	48.3353	44.5884	35.726	65.8615	53.5658	55.4459	35.3583	49.6893	30.1379	30.1477	41.2537	28.3671	42.7686	39.9248	50.8043	40.8802	42.3473	32.5648	17.6476	15.1867	15.8832	12.0818	15.6782	28.3404	10.3502	6.35671	13.8948	7.83787	20.9465	15.3479	15.0244	10.9045	18.8932	8.34785	10.2737	7.95195	15.8921	9.45022
	lmo0927	hypothetical protein	lmo0927	-	986782	1.1	1961	1948.66	2056.44	1180.76	1114.49	1081.87	1145.87	960.611	1108.66	1052.14	1073.82	1985.79	2097.14	958.705	913.293	928.039	812.622	858.472	1010.96	920.068	895.37	21.4219	10.1709	18.2355	6.93558	15.7501	20.0347	22.8749	6.38587	19.193	5.24922	8.01622	7.11616	25.1556	6.89727	22.4308	14.3263	20.6417	9.31983	16.4972	6.68066
	lmo0928	3-methyladenine DNA glycosylase	lmo0928	+	985312	5.2	623	107.716	113.502	63.2866	79.1513	68.2992	67.5638	66.1509	66.5731	75.6861	65.2625	51.5082	73.1803	75.3423	81.2308	82.1086	99.2967	70.9672	91.9841	77.3978	66.0652	9.29042	7.9949	16.7232	9.08628	11.0049	11.6041	21.7952	10.0393	31.0879	8.25237	20.4789	11.1874	24.8584	8.92978	12.6588	8.78932	19.4707	7.53524	11.7128	8.84444
	lmo0929	sortase	lmo0929	+	986837	3.6	668	805.358	1212.28	262.91	307.684	224.563	255.105	227.736	227.734	243.068	226.003	929.813	1465.31	434.137	307.02	443.606	333.471	385.597	400.281	378.513	254.459	4.33275	7.45713	8.91332	1.69502	1.28308	6.18491	6.09873	3.12134	8.52847	4.39845	2.93868	2.31887	4.21569	1.18987	10.1205	3.07429	12.1073	2.34279	14.0463	3.09357
	lmo0930	hypothetical protein	lmo0930	+	986560	1.4	731	172.637	188.117	183.692	176.996	175.376	231.632	200.523	236.654	165.444	193.614	107.438	133.728	164.089	119.11	141.295	130.503	153.305	135.679	142.767	99.3286	41.5784	32.3728	52.9502	29.4336	12.8992	32.5024	27.8692	16.1653	34.2957	17.0845	21.4861	23.3122	42.3815	14.1371	40.0812	17.7948	47.9496	24.9802	51.3497	28.2732
	lmo0931	lipoate protein ligase A	lmo0931	+	986568	6	995	188.408	243.066	209.97	195.726	186.677	221.555	227.831	209.707	193.173	182.902	143.921	201.232	186.183	119.848	160.627	126.222	165.491	131.386	168.801	114.274	18.9166	25.0443	55.3794	29.6016	16.3747	48.8133	23.2132	8.38626	26.3509	11.0789	17.7649	13.2392	22.653	10.3899	20.3935	4.12992	16.2646	6.81904	19.9178	6.92637
	lmo0932	hypothetical protein	lmo0932	-	987846	3.8	605	25.7214	60.3493	144.446	55.2301	90.5983	44.8704	55.4121	39.2339	53.5294	46.4248	55.9144	180.976	160.436	46.0785	126.377	58.613	101.527	86.294	104.673	70.4195	23.9159	28.8133	46.7398	61.7507	65.1577	29.0185	69.5719	42.4987	30.1283	35.2039	9.73256	19.1995	39.5586	5.2543	57.7255	19.2321	24.5043	24.1393	32.7361	12.5223
	lmo0933	sugar transferase	lmo0933	-	984547	6	947	100.177	102.059	103.083	102.632	93.3196	105.493	100.774	95.9263	82.05	90.969	108.405	115.15	84.7746	60.339	75.9925	61.6298	80.6783	73.0353	81.0886	59.6326	42.8065	40.7841	62.901	68.1816	53.4225	45.829	57.3847	31.5723	40.9259	25.6077	32.1441	27.0009	50.575	18.4732	44.0425	15.1866	39.8724	20.9418	34.1429	10.1879
	lmo0934	hypothetical protein	lmo0934	+	986642	5.2	1139	172.279	123.351	95.5729	89.7534	120.451	98.7915	106.89	101.69	122.388	100.62	116.078	113.522	63.7403	79.2531	69.9589	68.6575	64.5697	68.8448	68.9742	79.3936	39.4109	22.9748	30.0766	21.8836	25.6008	36.2956	45.3339	17.7068	36.035	18.0684	33.6285	8.84526	377.277	188.532	357.34	247.165	346.965	217.226	303.158	188.2
	lmo0935	rRNA methylase	lmo0935	+	986554	5.2	509	161.015	187.016	227.341	139.161	188.504	130.984	181.57	116.599	176.591	118.629	134.383	214.917	141.054	90.0312	137.974	76.2691	106.768	91.5455	121.175	100.16	17.0507	12.2275	20.4613	20.0112	11.7817	12.1697	24.0003	10.9186	15.6623	7.21216	11.5646	6.08361	340.095	107.698	305.343	178.785	272.64	177.221	255.909	127.152
	lmo0936	nitroflavin reductase	lmo0936	+	986658	4.1	740	316.146	283.267	251.516	233.766	284.852	232.876	244.889	230.009	286.293	221.486	235.13	266.013	166.117	168.924	169.996	146.439	158.006	154.582	174.258	179.969	15.647	15.1482	28.1654	35.1974	35.9107	26.5237	33.0369	42.2708	30.7992	22.8336	18.572	9.42098	479.565	249.228	426.401	397.832	582.981	304.582	424.126	293.263
	lmo0937	lmo0937	lmo0937	-	987860	4.1	161	35.6708	33.9156	24.3312	14.8508	11.7478	16.1393	14.4826	11.3896	28.8517	17.1944	27.5439	47.1765	163.27	179.931	160.165	181.464	186.027	178.704	207.02	136.721	8.94633	7.69879	18.4044	0	0	19.156	0	4.29667	7.04389	0	0	4.78803	0	4.91374	6.96568	0	0	3.22496	6.44513	4.25843
	lmo0938	protein-tyrosine-phosphatase	lmo0938	-	987839	5.2	458	90.2813	81.7342	61.5705	51.3356	53.2732	47.421	59.581	43.4146	53.4986	39.81	80.9607	101.43	90.8695	60.9762	81.0158	65.1961	88.7729	63.9834	90.0327	57.6023	34.7328	19.0205	32.4783	14.8231	20.5712	42.8194	41.482	18.1976	47.2355	28.8486	21.4159	25.3484	12.2889	15.6084	31.9602	16.4297	26.4699	13.6586	22.7475	12.0238
	lmo0939	lmo0939	lmo0939	-	985869	1.1	746	17.1003	19.0775	23.496	9.75672	13.5106	6.38765	18.2559	6.56326	13.9148	7.15948	38.5469	46.2103	58.6564	24.0861	50.5811	27.9786	45.3738	29.4583	46.3253	22.8199	11.641	1.66962	13.9696	6.07212	4.59642	12.463	12.7445	6.52265	10.6931	5.90876	10.5273	10.3837	28.3163	5.32815	21.1488	2.75328	23.4934	2.79755	11.1819	5.54109
	lmo0940	lmo0940	lmo0940	-	987854	6	962	3.39513	3.12016	1.62179	2.13088	1.37739	1.28963	0.989758	1.42333	2.31812	1.44625	104.038	100.856	37.8034	37.4342	37.808	29.9239	31.2178	37.0132	37.2389	41.8452	0	0	1.54803	0	0	1.07417	2.82454	0	1.18495	0	4.08303	6.4437	17.572	4.13305	16.4052	3.55954	8.411	3.79761	5.42113	1.43274
	lmo0941	lmo0941	lmo0941	-	986402	1.2	974	24.0973	26.0629	13.4249	12.6279	15.438	10.9275	11.2045	11.1924	14.0953	10.0563	57.4925	68.7181	19.3025	15.4773	20.9707	14.7778	16.3236	17.0345	18.6157	21.1111	1.48647	2.55837	6.11591	0	1.76078	1.06095	1.39489	0	2.34074	0	1.00819	5.56885	4.33892	1.63287	6.94425	2.81258	2.76916	3.75087	5.35441	0.707555
	lmo0942	heat shock protein 90	lmo0942	-	986476	3.5.2	1805	57.6368	91.4581	39.162	35.1841	46.0153	32.1391	35.5224	31.0293	34.7259	31.4023	70.4153	94.4393	25.2272	16.6756	24.6621	15.4008	20.2771	19.2961	21.8388	22.1844	42.5322	35.9106	54.4794	23.8598	17.1106	37.8029	45.9364	12.3333	33.4877	17.5152	62.5934	69.5776	74.9581	21.5976	65.607	29.9888	56.8092	25.4568	50.2977	25.2111
	lmo0943	non-heme iron-binding ferritin	fri	+	986847	5.2	470	13095.3	25425.5	12188.1	18134.2	9205.04	15705.1	12803.3	13759.3	10701.3	13173.3	11281.4	18839.2	14212.5	10990	13680.6	12637.7	14912.9	16353	14330.9	11319.4	24.6167	50.3119	41.1461	45.7439	18.2247	17.5699	20.2126	25.1232	21.8046	31.2374	18.7832	27.9963	20.9576	11.8305	26.3542	33.4778	25.7955	16.6383	37.6855	14.6468
	lmo0944	hypothetical protein	lmo0944	+	986825	5.2	302	496.11	1020.27	1087.33	1343.97	1711.09	1546.95	1215.92	1494.54	1608.18	1751.82	573.18	1166.36	1446.8	1619.66	1623.07	1533.34	1490.2	1686.81	1714.78	1719.15	52.6151	20.5809	24.5999	37.4247	16.9976	34.1395	40.3966	22.9723	56.4906	21.8507	12.9767	28.1593	37.2317	28.8986	52.1392	33.939	71.2853	13.7939	41.3509	20.4911
	lmo0945	competence protein ComEC	lmo0945	+	986792	5.2	1130	83.6319	91.9973	124.017	95.8481	126.356	81.5461	129.328	84.2739	124.287	84.1803	75.515	100.685	119.5	91.5727	125.385	97.2493	108.147	85.3722	114.113	87.664	37.1617	30.8769	30.3159	18.0472	12.9023	19.2068	14.4299	9.23156	32.286	14.3095	39.1109	37.72	19.9491	7.74207	20.9525	7.27392	15.5168	6.00509	12.9244	14.6391
	lmo0946	lmo0946	lmo0946	+	987862	5.1	227	134.395	195.796	222.786	181.245	213.483	142.195	250.182	138.037	237.432	160.776	160.235	197.49	240.301	149.342	235.993	167.361	220.403	160.736	229.179	152.837	6.3566	5.47019	0	0	3.76483	0	0	0	5.00487	0	8.62271	0	0	0	14.8479	0	0	0	9.15886	3.02573
	lmo0947	hypothetical transport protein	lmo0947	-	986474	6	1217	38.5794	34.7484	28.2707	21.7276	27.5096	21.0904	24.0782	20.4292	25.0292	19.5762	53.6355	49.7794	19.8066	18.2665	18.6521	16.2927	18.0276	20.5742	18.3565	24.0398	349.832	338.937	200.725	148.03	129.673	435.682	190.938	118.296	245.46	135.29	178.358	243.907	134.3	113.718	142.676	82.178	146.302	84.0713	129.442	184.078
	lmo0948	transcriptional regulator	lmo0948	-	986781	6	689	42.9763	38.1966	22.2034	21.7407	24.4056	20.9354	18.0639	18.5658	23.2536	20.7499	47.9959	43.6588	14.4275	17.4773	13.43	11.9324	10.3584	11.8837	10.7404	20.5875	50.4106	41.5735	41.0497	23.008	22.3926	55.4692	25.6235	12.1054	42.9983	20.2568	28.4924	16.8622	26.568	11.5366	27.8022	8.94218	31.3035	13.629	15.132	18.9963
	lmo0949	hypothetical protein	lmo0949	+	987856	5.2	1046	56.0641	60.5125	107.33	42.51	62.1324	36.5839	69.1166	37.8138	52.0375	34.8518	80.3749	98.9693	70.1655	19.8948	57.0441	23.44	44.055	31.6062	47.3279	25.9725	37.3746	33.3541	35.5958	30.3258	23.7756	43.4716	42.8659	15.2907	32.6966	21.0785	29.1047	43.7096	52.5271	22.8088	49.5781	17.0246	30.9448	18.4627	40.8868	21.0847
	lmo0950	lmo0950	lmo0950	-	987861	2.1.1	899	240.778	271.664	168.491	168.094	196.85	170.092	181.34	160.145	198.431	157.597	261.916	315.894	192.317	157.137	207.786	145.843	176.676	163.483	197.763	157.387	53.1412	22.1725	54.6609	23.9393	20.9827	37.9289	34.756	14.6946	35.5012	20.4344	29.4897	17.2369	20.3688	9.7292	21.315	10.6644	13.4997	10.4489	11.6012	11.4978
	lmo0951	lmo0951	lmo0951	-	987836	2.1.1	821	135.143	175.353	111.104	88.4069	119.902	89.7762	96.2413	77.9864	108.885	82.8191	132.995	190.213	114.211	66.6068	119.425	70.1778	97.9752	81.075	109.792	71.5949	33.4998	12.1382	50.7799	16.5543	12.5311	28.9438	26.4724	11.0082	24.9878	14.319	15.546	14.1544	18.8706	4.84201	9.60959	10.8423	13.1383	8.26248	11.4319	5.87477
	lmo0952	lmo0952	lmo0952	+	986763	3.5.2	458	331.473	422.699	285.817	245.424	231.688	251.488	247.429	214.546	229.193	223.81	403.892	560.429	160.209	130.523	148.225	127.633	139.5	155.037	159.404	149.564	9.47259	0	6.49566	0	3.74022	9.0146	5.926	6.06588	12.4304	0	8.56635	1.68989	21.5055	1.73426	7.37543	2.98722	8.8233	2.27644	4.5495	1.50298
	lmo0953	lmo0953	lmo0953	+	986396	1.1	227	62.3621	61.3745	38.8163	40.3456	46.5413	49.3097	46.6278	58.7295	48.3431	50.0899	98.7705	83.2418	601.708	775.278	645.049	1012.73	739.417	924.047	817.553	651.781	6.3566	5.47019	0	0	3.76483	9.07391	0	0	10.0097	6.45298	0	6.80404	12.3697	3.49134	0	12.0275	5.9209	4.58284	13.7383	0
	lmo0954	lmo0954	lmo0954	+	986596	2.2	314	1190.01	1480.96	707.348	658.854	1599.4	615.045	599.115	457.222	833.144	584.51	427.618	530.534	207.381	206.978	230.03	204.912	167.249	181.419	190.804	449.677	4.60097	3.95938	18.9302	3.5999	8.17506	3.28389	8.63503	0	7.24514	2.33537	3.1206	12.3121	0	0	0	0	8.57121	0	3.31464	0
	lmo0955	lmo0955	lmo0955	+	987852	2.2	845	1562.76	1875.49	965.765	887.426	1701.29	650.55	794.888	503.685	1056.31	568.687	504.031	801.901	286.962	217.096	302.882	226.832	233.33	213.627	233.77	430.953	5.13938	10.3197	3.52424	1.34039	2.02927	4.8909	3.21517	1.64553	17.5348	1.7391	3.48577	1.83371	3.33369	1.88186	2.66771	0	1.5957	0.617545	3.70252	1.63089
	lmo0956	N-acetylglucosamine-6P-phosphate deacetylase	lmo0956	+	986776	5.2	1133	54.579	54.6587	110.966	119.493	116.104	137.126	113.469	146.95	106.425	136.278	42.2995	48.4121	195.757	156.615	179.671	202.129	199.932	196.781	199.156	148.072	26.839	20.8967	28.9211	7.99977	7.5695	20.0682	17.9897	11.6624	17.1066	11.6768	13.8693	21.2041	14.9222	8.42355	14.9265	3.62734	17.8567	8.75346	14.7317	4.86678
	lmo0957	glucosamine-6-phosphate isomerase	lmo0957	+	986480	4.1	704	171.376	218.458	206.445	225.83	196.817	249.681	220.267	249.606	214.131	235.64	192.942	217.895	279.112	229.964	265.344	256.702	268.604	285.311	286.047	225.921	8.22301	1.76908	2.11454	4.82539	1.21756	4.40181	7.71641	0.987319	6.47438	2.08692	8.36586	4.40091	4.00042	0	12.805	1.94487	1.91484	2.22316	10.3671	0
	lmo0958	GntR family transcirptional regulator	yvoA	+	986478	5.2	722	264.282	267.165	266.932	303.69	281.414	364.61	283.132	390.462	294.192	365.311	282.642	296.948	342.515	331.63	307.938	375.358	348.033	375.592	351.806	335.056	14.032	0	16.4952	1.56842	2.3745	10.0152	13.1675	1.92548	14.2047	6.1049	5.43839	2.14567	7.80166	1.101	14.047	6.63758	0	3.61302	7.22068	3.81669
	lmo0959	undacaprenyl-phosphate N-acetylglucosaminyltransferase	lmo0959	+	986475	5.2	1055	314.293	401.279	126.98	94.5476	127.575	84.3667	91.0229	72.8364	125.847	78.1835	390.659	470.546	79.4074	57.6489	91.8288	56.2764	66.2869	64.0603	79.0997	73.2453	46.6633	30.7077	45.1743	22.5505	14.6315	46.0398	46.3642	7.25062	44.3045	20.8989	8.37774	8.0798	49.4086	9.79956	32.058	9.08896	39.6297	8.90528	33.6172	8.49267
	lmo0960	protease	lmo0960	+	986469	5.2	908	255.29	134.204	37.5535	33.0836	35.0212	33.509	41.297	39.4948	38.9095	37.5688	226.495	132.631	27.0192	21.2124	23.0853	18.5216	19.8596	20.7566	24.3201	17.3497	28.6991	19.2089	63.9597	14.9699	16.0533	48.9332	41.8927	16.8463	41.4264	16.995	4.32558	4.26656	21.7185	8.75716	24.8282	5.27939	11.8809	8.04643	19.5268	9.10715
	lmo0961	protease	lmo0961	+	986465	5.2	1226	146.803	64.9989	21.9415	18.6271	21.8087	20.7759	28.0247	25.2203	19.7855	21.0671	164.954	85.2811	19.5429	18.0799	17.687	14.8397	15.3131	17.6274	21.2929	16.1138	55.5154	35.5763	65.6077	24.9528	19.5882	48.054	37.6859	22.1242	52.08	21.5836	8.01132	10.7467	19.5375	11.6776	16.5541	6.14608	13.2026	11.0705	17.8699	9.55805
	lmo0962	LemA protein	lemA	+	986467	5.2	557	828.619	959.724	752.771	700.625	709.619	746.415	596.926	691.661	582.966	714.442	726.566	746.34	627.15	541.103	579.957	511.699	528.591	626.705	593.711	593.321	59.7384	37.9973	77.4764	24.3864	24.6131	70.4448	51.1835	19.9587	40.9	15.8202	15.8547	16.6809	27.7986	4.27971	24.2675	11.0575	26.6122	4.68139	26.1963	8.65424
	lmo0963	heat shock protein HtpX	lmo0963	+	986470	3.6	914	715.478	570.919	546.28	437.01	553.766	501.267	476.689	488	452.569	485.74	585.88	500.458	432.648	381.928	424.049	380.346	409.888	412.958	446.217	426.527	126.715	119.95	83.0912	78.0765	53.4729	99.4858	93.6406	50.2076	78.5682	53.0626	5.37152	18.6498	20.0349	10.4397	18.499	11.2388	36.8843	11.4195	7.98773	11.3093
	lmo0964	hypothetical protein	lmo0964	-	986468	2.4	818	1043.7	1307.02	687.407	825.187	714.16	799.213	710.891	710.821	756.808	662.735	1157.58	1460.71	729.212	672.996	788.885	681.343	770.389	778.474	782.174	737.827	26.5441	41.1166	52.7861	23.5378	20.9617	25.2607	33.2117	31.4459	37.619	24.2519	12.0023	12.3121	32.7141	7.77559	9.64479	14.2303	16.4831	8.29275	19.1229	10.1079
	lmo0965	hypothetical protein	lmo0965	-	985451	1.1	584	92.0219	115.933	68.1414	56.2451	54.4176	51.0622	61.9132	49.1131	63.0829	45.6153	99.3962	146.646	80.1166	54.0161	80.0199	55.3039	61.0877	60.6433	67.5277	47.5744	59.4587	66.0912	61.1591	36.8297	33.7483	40.6697	37.1971	21.4172	50.716	17.6051	26.8852	26.5183	36.1577	10.8858	46.295	14.0629	27.6916	10.7168	14.2784	5.89629
	lmo0966	lmo0966	lmo0966	-	986839	1.1	467	113.728	122.72	54.6657	63.2001	62.8464	54.47	67.835	58.9132	62.755	51.1863	109.646	146.565	61.9507	61.0437	76.5197	58.642	59.8282	63.3787	66.8298	50.9194	46.4521	85.2789	60.522	62.9982	42.1854	37.5753	58.1204	40.1573	80.4629	45.5845	21.004	23.2035	39.1708	15.3082	21.7008	21.9733	8.65362	17.8613	24.5411	14.7407
	lmo0967	hypothetical protein	lmo0967	+	986471	1.1	668	193.441	232.01	110.389	97.5197	104.049	91.1579	104.004	73.994	103.546	78.1102	203.533	268.176	118.065	89.1659	117.604	89.2253	109.699	93.3634	109.836	90.222	30.3293	13.05	82.4482	6.78008	5.13232	49.4793	30.4937	11.4449	23.8797	17.5938	16.1627	17.3915	27.402	14.2785	38.7954	14.3467	18.161	11.714	31.2141	15.4679
	lmo0968	inorganic polyphosphate/ATP-NAD kinase	ppnK	+	986453	1.1	794	257.658	247.72	154.916	131.64	141.166	139.032	149.588	137.066	150.578	125.995	205.215	251.309	158.307	114.944	144.612	117.572	132.815	112.35	138.564	113.264	134.904	84.7158	123.761	64.1868	72.3416	119.707	95.8	54.2839	100.475	55.52	77.8972	83.908	67.4034	35.0452	85.1653	25.8705	52.6401	45.3441	82.7408	52.9331
	lmo0969	ribosomal large subunit pseudouridine synthetase	lmo0969	+	986458	2.1.1	890	163.676	170.06	125.287	104.353	105.892	108.28	111.253	108.276	115.798	103.354	138.815	172.48	120.536	88.0114	113.531	91.754	104.777	91.1362	106.294	79.9113	14.6395	47.5925	78.6368	31.8173	21.1946	55.7266	39.6863	21.0927	46.1054	19.8152	31.994	60.068	42.7318	20.5484	35.4617	10.7721	24.2418	18.177	24.6087	20.1308
	lmo0970	enoyl-ACP reductase	lmo0970	+	987821	5.2	788	313.006	370.054	412.951	269.587	441.193	356.313	382.667	330.138	386.116	307.145	337.821	435.082	475.861	369.849	458.352	390.048	426.97	377.897	494.71	326.65	5.51067	1.58074	18.8942	24.4328	22.8466	10.4885	15.5135	23.8195	10.1239	10.2561	12.4587	8.84784	3.57452	9.08014	10.0115	6.95125	5.13295	5.29727	7.94	2.62307
	lmo0971	DltD protein for D-alanine esterification of lipoteichoic acid and wall teichoic acid	dltD	-	986447	5.2	1274	964.483	1867.74	645.946	1277.12	558.977	1133.8	621.911	1080.53	554.367	944.793	1440.45	2415.16	505.456	592.638	470.59	535.312	410.256	679.57	396.182	745.252	18.1874	13.6948	50.2764	17.7877	10.7718	23.5281	30.9337	13.1023	30.4296	9.80853	13.8775	14.6007	49.77	9.36501	20.3562	17.7441	29.6463	12.2928	31.1186	14.6089
	lmo0972	D-alanine--poly(phosphoribitol) ligase subunit 2	dltC	-	986460	2.2	236	270.775	601.305	356.164	460.686	259.64	404.595	258.315	368.58	219.585	402.191	483.924	1026	256.01	175.507	197.77	189.733	147.988	263.898	173.307	262.017	6.11521	0	6.2901	9.56935	3.62186	8.72933	5.73847	8.81088	24.074	15.5198	4.14763	6.54566	11.9	10.0763	9.52271	8.67806	5.69606	2.2044	13.2166	8.73248
	lmo0973	DltB protein for D-alanine esterification of lipoteichoic acid and wall teichoic acid	dltB	-	986448	1.2	1184	278.539	507.994	391.937	546.314	260.614	485.569	320.93	445.943	249.255	403.555	445.857	724.596	272.689	199.887	200.847	203.584	187.286	258.037	183.271	251.937	15.8996	9.47244	27.6764	6.69854	5.07061	20.9504	12.6246	5.28653	10.5926	2.48317	11.6134	10.4731	17.85	4.70226	21.9022	12.7278	10.2529	8.37673	22.9088	5.82166
	lmo0974	D-alanine--poly(phosphoribitol) ligase subunit 1	dltA	-	986449	1.2	1532	685.556	924.402	609.277	1197.52	537.471	1188.88	696.26	1161.99	580.977	992.164	967.399	956.363	452.194	555.115	388.544	518.035	394.515	579.172	379.282	618.353	17.0173	11.39	30.1457	12.575	6.71923	20.2432	16.8561	10.4432	20.8422	8.63765	23.7251	15.6852	31.2753	11.4237	27.2357	12.0746	32.5823	11.5871	19.7516	8.5502
	lmo0975	ribose-5-phosphate isomerase A	lmo0975	+	986443	1.2	674	13.63	12.9727	24.6801	21.2804	17.6003	23.3374	26.2859	22.6491	18.7063	16.8367	8.7796	12.3603	39.723	17.1014	28.7854	17.9836	32.6389	17.168	27.8198	14.2591	19.3241	16.6294	28.7108	25.1993	15.2601	32.1821	22.1633	17.5304	28.7391	19.6171	5.82512	14.9387	27.1584	5.89649	20.0612	8.12524	11.9997	5.41793	9.28098	7.15417
	lmo0976	hypothetical protein	lmo0976	-	986442	2.1.1	443	285.132	519.928	426.627	535.64	588.658	680.728	470.128	672.627	612.136	725.356	256.898	454.281	282.8	334.063	309.428	311.674	293.073	332.044	326.467	382.885	88.1335	47.7533	181.308	112.375	110.198	109.5	168.471	101.901	110.513	79.5287	53.1345	64.6384	231.849	34.0642	172.824	74.1154	161.144	64.7171	96.4156	35.7363
	lmo0977	hypothetical protein	lmo0977	-	986913	4.1	749	234.391	482.357	496.499	502.207	538.491	538.687	475.395	478.959	527.764	518.175	246.438	505.176	333.867	267.671	351.934	257.345	326.76	300.601	356.056	307.533	27.0537	26.607	121.248	80.1337	54.9364	49.6524	94.2946	33.4109	60.8592	35.3107	32.7663	42.4028	169.218	30.7797	121.872	51.189	118.797	43.1886	90.4896	27.5947
	lmo0978	branched-chain amino acid aminotransferase	lmo0978	+	986440	3.5.2	1019	537.389	481.596	317.461	337.983	337.544	399.682	325.763	419.158	345.932	415.584	437.598	472.23	241.429	257.259	234.685	241.95	227.117	255.278	246.844	248.865	4.26266	4.891	16.0767	2.22347	4.20775	6.08486	4.00005	3.41206	11.1874	5.04851	6.746	3.04181	9.6775	4.68251	14.3821	5.377	5.29398	7.68299	12.2837	3.3817
	lmo0979	daunorubicin resistance ATP-binding protein	lmo0979	+	986435	6	764	3.97569	4.48883	4.6664	3.60737	4.44781	2.99051	5.94213	3.79017	4.46835	2.8401	5.74168	5.9942	10.2584	10.0316	8.51838	8.34786	11.5581	8.58581	9.44112	7.12449	9.47259	8.15166	13.6409	17.7877	12.3427	20.2829	19.5558	9.09882	14.9165	14.4243	8.99466	12.1672	7.37333	4.16223	14.7509	3.58466	5.29398	4.09759	9.55395	5.41072
	lmo0980	ABC transporter permease	lmo0980	+	986436	1.2	752	13.1269	12.085	10.0741	6.10809	8.27151	8.24646	9.05524	7.63113	9.63497	6.51056	9.81456	10.4033	13.7994	8.13601	12.1475	9.67243	11.2531	8.05594	10.0086	7.46903	19.2471	4.96894	15.838	15.0593	11.3995	26.101	18.0613	10.1682	18.185	12.7003	13.0543	9.27085	13.109	9.51425	17.9831	5.46269	12.5495	9.0196	16.6392	12.8262
	lmo0981	transporter	lmo0981	-	986765	5.2	1475	151.349	132.38	180.435	160.025	181.022	165.314	185.233	183.798	175.017	178.943	168.633	169.231	146.116	150.43	147.68	161.766	135.934	151.355	145.606	150.296	40.2585	23.6597	27.2699	17.6702	8.14183	25.9307	26.7212	13.676	25.5126	12.9584	27.9712	18.393	21.9739	11.8649	25.9939	12.0764	19.2068	10.9727	19.807	12.1521
	lmo0982	peptidase	lmo0982	+	986804	3.7.5	1052	246.374	340.95	420.728	597.797	400.738	649.171	517.823	648.183	431.683	596.406	222.006	384.791	602.29	582.786	573.663	753.475	661.889	722.881	621.777	570.727	22.0217	9.47544	21.2358	3.23068	8.15177	25.5414	15.4988	8.59333	20.5898	6.28752	7.4681	9.57606	17.4093	12.8513	21.4329	11.068	24.3583	9.92295	28.7552	10.4823
	lmo0983	glutathione peroxidase	lmo0983	+	986438	3.5.2	479	137.497	329.267	466.367	433.699	252.55	302.445	418.983	268.092	302.297	242.685	245.764	617.644	731.938	325.399	675.57	462.136	702.753	565.038	658.656	377.603	0	5.19669	15.5287	0	3.57659	8.62021	5.66674	4.35037	0	0	2.04789	3.23192	2.93781	0	11.7546	2.85653	14.0621	3.26527	19.5771	1.43722
	lmo0984	hypothetical protein	lmo0984	+	986785	5.2	455	12.0055	9.97806	18.1034	21.7245	13.7853	23.6515	20.7413	18.7287	14.8395	16.493	10.5498	11.4527	6.69273	4.66694	5.50651	6.71297	5.17075	5.59639	4.82048	4.70462	3.1783	0	13.0768	0	0	0	2.98249	1.52645	0	0	0	0	6.18487	0	9.8986	1.50344	5.9209	1.14571	9.15886	0
	lmo0985	lmo0985	lmo0985	+	986431	5.2	428	2.83581	1.80103	4.33396	3.29883	3.76406	3.50437	6.49439	2.58059	3.41487	2.33747	1.7877	1.63303	2.20194	1.05226	2.09038	0.738151	0.687022	1.95036	1.61036	0.405463	6.75667	0	6.9499	2.64328	2.00089	7.23375	3.1702	3.24503	2.65993	3.42956	0	3.61613	6.57412	1.85554	7.89119	3.19612	3.14677	3.65345	7.30147	6.43232
	lmo0986	antibiotic ABC transporter ATP-binding protein	lmo0986	+	986427	5.2	911	4.08522	2.35332	4.56662	2.94833	3.66766	2.79517	3.69807	3.23706	2.9832	1.95473	2.21699	2.79335	3.10734	1.2728	1.57329	0.983797	2.18141	1.1468	2.13478	1.14437	3.1783	0	3.2692	0	0	5.67119	4.47374	0	6.25608	1.61325	1.07784	0	15.4622	0	11.1359	0.751718	7.40112	2.29142	4.57943	0
	lmo0987	CylB protein	lmo0987	+	986424	1.2	854	3.91292	3.31347	3.47933	1.90348	3.37256	2.82862	4.45912	2.34301	2.9373	1.88957	2.85405	3.20304	2.54961	0.980529	2.44734	1.66667	1.80976	1.41898	1.76292	1.35629	0	2.91744	6.97428	5.30511	1.00395	9.67884	3.18133	2.44232	9.34242	3.44159	4.59878	2.72162	14.8437	0.931024	7.91888	4.811	9.47344	6.11045	14.6542	0.806861
	lmo0988	peptide chain release factor 3	prfC	+	986429	5.2	1568	450.637	321.127	377.684	273.298	415.605	304.157	349.535	298.432	422.478	301.592	421.833	387.691	246.752	253.803	260.516	216.258	224.759	207.763	266.506	288.945	9.23713	3.97452	3.80052	7.22733	4.3767	8.57077	7.80125	7.09813	15.273	3.75087	6.26506	6.92113	16.1776	5.58081	14.3842	5.68029	6.88319	5.32766	15.9711	9.67308
	lmo0989	MarR family transcriptional regulator	lmo0989	+	986432	5.2	425	32.4845	50.3808	32.2972	69.4311	41.1547	54.1632	49.0509	67.5679	40.7757	46.8171	66.2835	80.5822	52.7069	48.7449	53.7504	63.9281	55.5218	62.262	51.3046	69.4142	0	0	0	5.32379	2.01498	0	6.38506	0	5.35732	1.72685	2.30748	0	16.551	0	2.64892	4.82794	6.33786	2.45279	2.45096	1.6194
	lmo0990	hypothetical protein	lmo0990	+	986420	3.2	1361	1.84226	1.82791	1.69273	1.50664	2.20182	1.43974	1.50728	1.08377	1.48536	1.59521	2.61067	1.9172	2.40079	1.18371	1.58022	0.891255	1.29838	0.798619	1.70613	1.36226	2.1282	1.83143	3.2836	0	0.630236	3.79745	1.99709	2.04423	2.51346	1.08024	2.16517	2.84751	4.14141	2.92227	8.28517	2.01341	5.94698	1.15076	9.19921	1.01302
	lmo0991	hypothetical protein	lmo0991	+	986787	4.1	767	68.3128	38.2296	69.7226	25.5215	79.5977	37.7886	54.7023	23.4072	76.3918	22.7046	63.4564	60.5371	49.4834	27.7939	52.6233	19.3106	39.6239	17.159	49.638	28.8396	13.2098	9.74378	15.5287	8.85912	4.47074	18.8567	17.7086	6.3443	31.2022	3.83146	10.2395	7.06983	27.542	11.4014	24.9785	7.14132	21.0932	8.16318	19.0333	5.38958
	lmo0992	hypothetical protein	lmo0992	+	986459	5.2	767	125.438	81.0423	89.2836	45.4227	85.2296	47.9166	72.2681	49.5602	75.4835	45.1191	116.11	112.367	63.6756	39.0458	68.5036	37.7279	59.3878	36.6059	59.5329	38.4277	7.54847	6.49586	3.88217	1.47652	3.35305	2.69382	5.31257	1.81266	4.45746	3.83146	3.8398	4.0399	9.18066	2.07298	13.2239	9.81932	7.03107	7.48291	5.43808	5.38958
	lmo0993	Na+-transporting ATP synthase subunit J	lmo0993	+	986421	6	1334	157.253	102.44	151.973	72.403	126.876	72.4146	121.208	71.633	124.315	64.8486	175.267	150.848	116.589	61.4936	120.331	59.8149	98.0234	64.0848	102.368	64.2788	3.25687	1.86847	4.46668	0	1.28596	4.6491	2.03748	0	5.12858	1.65312	2.94528	1.74306	9.50662	7.15529	14.3697	7.18947	9.10089	4.69612	7.03895	8.26806
	lmo0994	lmo0994	lmo0994	-	986414	2.1.1	368	154.543	202.408	67.1151	65.5824	72.6746	69.6154	61.1979	55.0036	65.9798	54.8039	202.548	188.994	3363.61	1950.39	3276.35	3115.32	3364.06	3634.34	3524.17	2091.1	82.4808	57.4593	80.7996	39.9501	46.5247	72.8864	73.7137	28.2951	80.4034	35.8849	45.2867	54.6536	15.2862	10.7863	24.4648	14.8632	7.31688	11.3267	11.3183	18.6956
	lmo0995	hypothetical protein	lmo0995	-	986413	5.2	1031	30.6498	28.8659	17.9441	14.1931	14.6971	11.7174	14.209	9.85904	10.4101	10.0407	68.8421	54.3696	1155.72	653.322	1037.08	626.634	1103.1	967.28	1035.66	536.27	43.5353	35.0474	39.0023	23.0749	14.14	34.0799	22.4034	12.8151	32.0661	9.97961	27.6227	24.8031	21.8628	3.08537	18.5887	6.64309	15.6973	6.07492	8.09388	7.35323
	lmo0996	methylated-DNA-protein-cysteine methyltransferase	lmo0996	+	986513	1.2	479	6.49466	3.57704	2.32409	2.35866	5.04619	1.49793	4.12415	2.08675	3.92405	2.66942	15.3966	10.6147	8.93161	6.31451	12.3307	7.03704	9.97792	5.57804	9.94396	5.67733	33.2133	15.5901	37.2688	14.1746	12.5181	28.0157	11.3335	10.1509	16.6412	9.1955	10.2395	19.3915	32.3159	9.95032	16.4564	7.14132	8.43728	4.35369	13.0514	4.31166
	lmo0997	ATP-dependent protease	clpE	-	986780	1.2	2174	207.899	194.394	173.874	172.361	198.891	206.55	193.931	185.373	196.229	183.061	128.446	78.2415	121.708	79.0467	121.027	99.0524	135.408	90.2874	126.301	93.4631	17.325	12.042	37.0118	12.5127	13.4184	27.5847	21.26	13.1211	27.8064	13.8672	29.3767	20.3277	53.1642	23.7893	49.807	21.749	37.2404	23.2998	40.8043	26.6431
	lmo0998	hypothetical protein	lmo0998	-	986409	5.2	611	230.714	381.27	203.426	177.015	209.104	123.572	137.891	115.6	205.407	133.357	457.512	658.529	240.432	149.209	251.058	189.293	224.18	224.762	259.015	190.902	2.36815	8.15166	17.0511	7.41155	0	8.45119	6.66675	3.41206	7.45823	3.60608	6.42476	5.06968	2.30417	0	7.37543	1.12021	4.41165	0	8.53031	1.12723
	lmo0999	lmo0999	lmo0999	+	986406	2.4	791	91.9717	98.206	70.8964	47.5307	63.0592	57.8538	60.1728	52.4515	51.3518	47.1985	135.391	137.911	77.5265	48.9364	73.7499	53.4442	66.2404	63.7566	72.0025	53.6619	168.354	125.98	188.226	78.7478	46.604	165.874	147.679	67.6725	138.316	58.5168	40.9578	29.3811	46.2928	34.1728	66.9655	24.2372	35.7945	29.0246	50.0962	30.4865
	lmo1000	phytoene dehydrogenase	lmo1000	-	986831	2.2	1472	52.2902	61.3706	53.0138	31.2247	55.2042	35.7217	43.304	32.2105	55.9319	35.0219	53.8641	79.8158	38.6752	33.492	40.6278	26.1918	29.3632	31.4688	35.9854	40.3861	69.8579	77.8974	80.9642	53.8885	48.3677	47.7535	77.557	49.6173	37.1848	41.951	50.0503	67.9296	94.7758	31.3439	70.4797	42.8189	68.7355	40.7882	66.6303	38.8723
	lmo1001	hypothetical protein	lmo1001	-	986350	6	284	1950.77	5339.81	1603.02	2743.25	1562.98	1629.51	1700.21	1437.25	1945.23	1841.55	2950.52	6743.14	1755.66	1180.93	1820.61	1243.89	1601.12	1590.48	1781.65	1665.99	0	13.1285	10.4614	15.9153	0	0	0	7.32695	0	7.74358	0	2.72162	0	2.79307	7.91888	7.2165	0	3.66627	7.32709	4.84117
	lmo1002	phosphocarrier protein HPr	ptsH	+	986517	5.2	266	6536.74	6699.43	6774.7	9323.08	6702.12	10022	8176.22	8752.73	6946.3	10049	7601.35	6559.9	6694.34	9142.17	7123.15	7553.16	8175.24	9188.73	7394.64	9130.42	32.5687	14.0135	39.0834	8.49414	12.8596	38.7425	35.6559	2.60697	25.6429	16.5312	29.4528	20.3357	5.28146	14.9069	42.2637	15.406	15.1681	13.697	54.7474	2.58377
	lmo1003	phosphotransferase system enzyme I	lmo1003	+	986170	5.2	1718	2286.71	2038.35	2893.8	3001.47	2474.71	3329.19	2952.01	3364.03	2555.59	3272.16	2548.79	2298.15	2705.94	2959.69	2688.17	3013.89	2840.16	3234.02	2834.11	3032.83	16.8622	7.98095	29.4855	15.1723	12.4837	12.637	12.6587	8.50335	26.5529	8.13098	29.7355	21.6589	17.227	23.1537	18.3807	16.3515	18.8477	16.7158	31.5845	18.4606
	lmo1004	hypothetical protein	lmo1004	+	986479	3.5.2	1034	38.0543	38.4039	59.2092	49.4294	46.3038	39.0921	56.9545	37.1826	43.0698	35.7942	28.8312	34.644	63.8179	23.9262	53.4888	27.9952	47.5559	29.5879	45.5708	24.3689	22.4047	13.2553	14.4034	10.9562	9.95225	25.9856	27.5946	8.74278	25.358	8.52916	17.0955	9.7426	23.1619	13.8439	21.8056	5.29907	23.4777	5.04776	15.132	9.99806
	lmo1005	3-hydroxyisobutyrate dehydrogenase	lmo1005	+	986400	2.2	860	31.9683	22.3347	31.7004	22.4361	42.667	25.5079	37.4681	24.124	34.1107	24.3932	27.4509	22.5609	44.1385	20.3727	39.8567	24.3967	40.821	21.768	44.9329	20.5392	10.0997	13.037	31.1656	19.7555	25.9209	15.6185	39.4895	25.0614	18.5546	19.6512	9.13346	2.70265	9.82682	4.62268	9.17432	14.3324	12.5432	9.70859	12.1267	7.21115
	lmo1006	aminotransferase	lmo1006	-	986673	2.2	1145	180.666	189.302	148.157	184.556	162.696	193.64	158.536	203.741	173.915	209.082	231.854	216.74	105.826	145.409	118.683	133.326	110.46	131.712	118.758	142.778	22.764	5.44156	18.2116	18.8005	26.2158	28.8845	28.482	21.2584	23.8976	13.4803	17.1551	6.09158	25.8404	9.72457	33.479	14.9557	25.9156	10.9412	21.8662	5.4178
	lmo1007	lmo1007	lmo1007	+	986404	5.2	221	45.895	56.0725	150.417	180.725	232.502	168.71	162.819	165.04	205.512	201.509	33.918	56.8031	62.5172	130.72	74.058	121.96	62.0664	103.646	59.692	173.421	6.5284	5.61804	33.5755	5.10796	3.86658	13.9787	6.12621	0	5.14013	6.62739	4.42788	3.49397	12.704	0	15.2492	6.17628	18.2428	9.41339	9.4064	3.10751
	lmo1008	hypothetical protein	lmo1008	+	986444	1.2	233	1496.01	2122.01	2151.67	2239.22	2217.61	2346.96	1989.93	2506.12	1958.67	2551.7	2042.15	3179.52	2184.27	2095.88	2124.92	2286.36	1814.37	2459.35	2086.49	2203.78	12.3872	5.32993	31.8537	4.84602	3.6683	8.84125	5.81204	11.8985	14.6296	3.14376	21.004	23.2035	36.1577	13.6073	19.2896	5.85955	5.76908	13.396	26.7721	5.89629
	lmo1009	hypothetical protein	lmo1009	+	986412	1.2	452	237.001	356.283	452.956	351.144	306.814	266.939	360.926	243.34	343.107	223.085	253.794	429.228	431.171	222.934	400.678	266.336	359.144	298.942	368.367	247.284	28.7942	16.5193	29.6176	15.0194	9.47441	31.969	9.00674	6.14622	30.2281	11.3675	15.1897	29.1087	28.0162	5.27169	27.4014	3.02679	17.8803	3.45989	23.0488	12.1831
	lmo1010	LysR family transcriptional regulator	lmo1010	+	986367	1.2	878	263.744	273.76	265.163	251.403	277.528	258.407	277.258	261.73	265.393	238.24	224.707	281.924	285.53	263.97	280.833	265.931	262.124	268.622	284.868	249.735	65.9525	53.9178	64.4467	39.992	18.5543	48.2497	47.9642	26.9238	62.3132	30.1286	79.3995	64.4178	40.1066	29.8849	39.7971	17.9386	33.7875	16.6421	57.0163	24.3298
	lmo1011	tetrahydrodipicolinate succinylase	lmo1011	+	986298	1.2	710	393.864	427.554	350.411	302.048	407.021	314.593	345.452	349.45	363.031	320.86	406.359	546.412	398.17	340.493	389.401	360.982	362.405	360.219	398.023	347.398	99.8818	73.6745	67.0944	39.8723	45.8769	87.2933	78.4258	55.8023	56.1728	69.3219	70.5097	49.0925	33.7166	34.7072	39.6779	21.213	28.4803	31.5964	52.8663	32.0191
	lmo1012	N-acyl-L-amino acid amidohydrolase	lmo1012	+	986510	4.2	1115	126.521	124.466	125.817	104.111	148.156	116.964	161.55	115.545	142.897	116.411	125.134	136.679	145.198	95.0571	145.927	105.887	154.695	105.638	155.547	106.611	107.789	72.6418	132.244	97.5456	82.3	154.793	126.74	91.0616	134.97	91.6254	74.8692	93.1349	108.667	59.2026	104.148	65.7309	104.03	71.1571	110.399	76.0337
	lmo1013	hypothetical protein	lmo1013	-	986362	5.2	845	366.604	264.244	209.311	222.651	234.569	248.708	225.588	268.699	227.919	238.775	360.14	238.342	174.273	194.762	185.927	190.025	185.863	186.182	191.827	184.498	34.2625	17.6908	66.9605	37.5308	45.6586	62.359	57.8731	52.657	57.9997	32.1734	10.4573	17.4203	41.6711	19.7595	26.6771	19.4487	36.7012	17.9088	35.791	14.678
	lmo1014	glycine/betaine ABC transporter ATP-binding protein	gbuA	+	986360	5.2	1193	514.861	540.259	930.382	586.11	897.085	598.514	799.685	550.049	852.555	562.183	639.045	716.947	1033.3	834.463	1017.85	732.215	812.612	738.81	948.319	737.003	12.1382	6.26736	9.9883	1.89944	4.31347	9.52989	9.11235	3.49779	9.55703	1.23223	9.05601	7.14595	16.5344	5.33351	19.8469	10.3352	13.5675	7.00091	17.4893	6.35555
	lmo1015	glycine/betaine ABC transporter permease	gbuB	+	985002	1.3	848	513.08	408.617	837.175	557.828	955.066	634.47	753.736	652.359	787.912	679.081	741.385	615.054	1011.56	980.394	1066.06	921.467	939.308	891.797	1037.56	934.325	17.0707	1.46903	14.0471	4.00695	9.09945	19.4945	19.2229	7.37873	10.7525	8.66478	16.2095	4.56809	16.6095	6.56323	13.2914	8.075	9.54039	6.15363	13.5279	8.12563
	lmo1016	glycine/betaine ABC transporter substrate-binding protein	gbuC	+	986358	3.5.2	902	844.806	648.763	1390.15	1150.57	1278.85	1123.2	1339.21	1074.38	1300.35	1165.96	1130.97	850.8	1567.3	1642	1601.09	1405.3	1477.17	1408.22	1534.14	1523.57	4.81497	4.14354	9.90534	2.51156	0.950588	11.4554	7.53055	3.85415	5.05475	2.44399	7.62006	2.57695	1.56163	5.28921	8.7476	3.79605	11.9598	5.78564	8.09388	3.81986
	lmo1017	PTS glucose transporter subunit IIA	lmo1017	+	986356	1.2	491	776.732	799.163	750.963	730.898	807.039	761.119	767.308	700.225	776.87	727.51	938.249	821.605	686.911	688.141	725.318	668.197	724.7	705.844	728.756	735.136	26.5117	15.2098	30.2999	0	6.97871	16.8199	16.5856	5.65902	20.874	7.47602	9.98972	12.6124	17.1969	9.70763	18.3486	11.1474	27.4383	8.49501	23.3439	9.81517
	lmo1018	copper homeostasis protein CutC	lmo1018	+	986357	6	695	26.7652	17.8852	23.9354	20.5366	19.555	21.2245	25.3875	23.3291	20.9483	18.5699	37.665	40.9948	41.4477	35.7652	42.7772	40.7208	39.5941	37.8081	43.3131	31.4065	4.16467	5.37588	8.56755	4.88779	6.16653	8.91746	13.6783	3.00026	13.1162	5.28477	12.7111	2.22891	34.4433	6.86229	27.5625	10.8351	17.4564	9.00764	25.5027	13.8766
	lmo1019	hypothetical protein	lmo1019	+	986368	5.2	872	162.783	119.087	93.794	61.6819	101.205	80.3386	92.0467	71.5585	92.7748	63.8779	176.258	178.59	92.8067	80.8139	93.1358	74.9651	82.7142	74.4218	94.8174	78.4374	11.621	2.85728	15.3686	1.29893	1.96651	20.1435	12.4629	3.9866	9.14979	0.842658	12.3859	10.662	27.46	7.29462	27.1446	6.2824	30.927	11.9689	17.94	12.6436
	lmo1020	hypothetical protein	lmo1020	+	986352	3.5.2	713	305.099	232.778	191.135	131.907	311.697	147.664	162.142	128.767	187.397	126.946	185.53	168.141	110.319	82.9139	107.094	82.6409	94.529	81.2683	96.229	102.563	10.1492	17.4678	12.5273	11.1173	15.6288	15.9365	9.52393	9.74874	9.58916	10.3031	13.7673	11.95	33.575	11.1488	26.8676	7.68142	26.4699	7.31713	21.9351	7.72959
	lmo1021	two-component sensor histidine kinase	liaS	+	985411	5.2	1058	325.393	312.104	218.407	200.653	280.294	190.414	214.208	167.413	212.906	175.336	235.759	253.851	177.303	153.031	177.04	141.289	163.439	144.152	164.749	161.515	13.6856	11.7772	8.44619	4.28316	5.67391	7.81436	14.1267	2.62912	14.008	2.08397	9.28223	10.9867	23.9685	9.02012	15.9836	6.47372	7.64853	7.40005	15.775	9.77148
	lmo1022	two-component response regulator	lmo1022	+	986610	5.2	638	248.572	241.559	161.428	145.839	210.828	145.765	155.586	145.201	164.631	137.749	202.287	213.789	137.482	123.326	132.762	113.237	124.074	127.077	131.603	139.01	24.9489	1.95181	4.66589	1.7746	2.68664	1.61882	10.6418	2.17859	8.92887	1.15124	6.15329	9.71093	6.62042	4.98295	12.3616	6.43725	16.901	3.27038	14.7058	6.47762
	lmo1023	potassium transporter	lmo1023	+	985239	5.2	659	257.137	250.263	191.223	161.783	225.79	173.611	175.408	177.403	179.37	158.773	248.036	277.816	161.842	167.084	161.148	150.017	151.162	162.144	163.29	168.234	19.7633	24.5661	22.5872	6.87253	6.50289	9.40387	20.6063	7.38245	12.1027	5.57303	13.4044	16.4534	6.40977	4.8244	10.2586	7.27117	6.13621	7.12423	22.1478	6.27151
	lmo1024	lmo1024	lmo1024	+	986351	3.5.2	920	48.1308	46.9792	18.8147	13.5988	17.2825	10.9295	14.3293	11.219	15.7549	11.4928	42.7709	36.581	16.7261	11.5533	15.3195	10.3149	12.5605	9.17561	14.5929	9.69502	23.6043	16.2502	14.5676	12.3124	13.9802	22.4631	22.1501	14.3595	12.3899	17.5723	16.0096	21.8971	15.3111	12.9646	24.5047	6.69935	8.79456	5.10531	14.7377	7.4904
	lmo1025	lmo1025	lmo1025	+	986700	5.2	851	45.0677	54.4113	21.1241	18.0222	18.9528	13.9627	16.9527	12.3132	19.8966	15.8237	50.3263	55.0171	24.0507	11.3536	21.6826	12.4511	17.556	15.3691	15.9958	12.2496	8.50531	14.6385	20.9965	27.9499	10.0749	16.9976	9.57759	8.98669	17.4113	16.4051	12.6912	10.9248	8.27552	3.73721	11.9201	6.43725	7.92233	9.81114	13.4803	9.71643
	lmo1026	LytR protein	lmo1026	-	986902	2.1.1	965	545.469	579.525	464.856	421.556	420.173	423.581	373.346	393.692	428.603	373.705	668.478	714.812	344.439	308.891	356.42	269.517	299.996	315.411	316.685	351.729	25.5054	14.2021	13.889	8.21716	2.66578	13.9208	7.03943	5.76447	9.45018	5.33072	15.2638	11.2415	16.0576	2.47213	14.0179	4.25818	11.1798	8.11247	6.48516	3.57074
	lmo1027	hypothetical protein	lmo1027	-	986344	2.1.1	1667	2011.88	1644.72	1623.72	1836.28	1896.26	2119.2	1366.8	1835.58	1898.98	1834.95	2363.05	2056.89	1692.36	2132.22	1827.46	1764.61	1694.27	1917.3	1902.34	2557.08	20.8533	11.2159	18.7685	10.1976	5.66079	16.1241	12.2304	7.09414	18.4712	5.29237	14.733	13.4857	21.9807	8.59021	18.2661	9.86427	17.8053	10.0229	18.153	4.96307
	lmo1028	hypothetical protein	lmo1028	-	986595	2.1.1	209	1122.06	1355.19	1143.89	1233.24	1085.86	1142.63	890.293	823.15	1129.46	951.044	1269.91	1730.2	1243.25	1002.64	1215.63	790.411	1060.69	1025.36	1185.8	1293.26	0	11.8781	14.1976	5.39985	0	0	0	6.62914	10.8677	0	0	3.69362	0	11.3718	5.37353	0	12.8568	4.97565	4.97195	0
	lmo1029	hypothetical protein	lmo1029	+	986340	1.2	770	130.177	128.161	117.006	120.687	121.849	119.876	137.983	121.709	127.307	122.764	136.818	136.133	106.121	106.394	106.698	112.127	97.4796	104.941	105.162	109.57	3.75955	12.9412	30.9365	13.237	15.5867	24.15	28.2235	9.02801	14.8004	11.4497	1.27495	9.05441	5.48696	2.06492	27.8085	6.22434	8.75464	10.1643	6.77114	13.4215
	lmo1030	LacI family transcriptional regulator	lmo1030	-	986852	6	1028	32.3648	64.6579	38.8838	40.1592	50.6651	40.7175	37.4073	37.6556	45.5581	42.4996	33.6745	61.0888	62.9895	53.7718	64.6654	60.0611	52.4876	57.9759	61.034	57.4741	16.9015	9.69644	57.9496	18.7342	10.8445	19.1002	31.7205	12.8524	18.8522	12.1534	15.2846	15.8298	41.1122	6.96233	23.0294	5.99621	24.9265	4.56947	24.3524	4.02254
	lmo1031	hypothetical protein	lmo1031	+	986327	5.2	1403	1.19143	1.16177	2.11882	1.96555	2.09488	1.30356	1.51441	1.0138	1.49062	0.991982	1.7877	1.08869	2.01844	0.780845	1.8736	0.601457	1.88931	1.0727	1.65509	0.991133	4.12908	3.55329	10.6179	1.61534	1.22277	10.3148	4.84337	5.45346	7.31481	1.04792	9.10174	4.97219	13.0569	4.53576	16.0747	4.39466	14.4227	5.95377	15.617	4.42222
	lmo1032	transketolase	lmo1032	+	986336	2.5	824	0.460819	0.416237	0.450732	0.600387	1.11846	0.396146	0.177741	0	0.676469	0.337635	0.676076	0.308792	1.05693	0.312672	1.01453	0.639731	0.62519	0.253547	1.06576	0.281121	0	0	10.8418	2.74901	2.08092	13.7923	8.24253	2.53113	2.76633	0	4.766	1.88039	8.54636	2.89464	6.83903	3.32396	3.27264	2.53306	10.1247	0.836202
	lmo1033	transketolase	lmo1033	+	986331	1.2	956	1.82738	0.717651	0.932548	1.18303	1.32577	0.478107	2.14515	0.661038	1.16633	0.523916	1.96703	1.26445	1.82229	0.943407	2.37391	0.937537	1.38589	0.743156	1.50939	1.27232	16.6587	15.6389	14.0196	15.4039	16.1451	19.4563	18.4746	8.72802	15.501	10.7617	16.4345	4.86308	17.6821	14.9723	25.9412	5.73097	9.87435	11.4643	26.1846	3.60432
	lmo1034	glycerol kinase	lmo1034	+	986330	1.2	1463	0.571302	0.82096	1.16839	0.579999	0.90603	0.401828	0.851373	0.360094	1.23892	0.723009	1.33345	0.73955	0.992677	0.528595	1.42929	0.901261	0.90594	0.485793	1.71595	0.514861	13.8595	16.1864	22.402	18.5896	14.0718	31.0893	23.2243	16.1653	25.7217	19.0945	17.4574	22.2526	23.1172	5.98107	20.0406	10.3022	21.2085	16.4156	19.9693	16.9639
	lmo1035	PTS beta-glucoside transporter subunit IIABC	lmo1035	+	985245	1.2	1856	4.42207	3.14363	4.88596	3.58182	4.75155	3.20309	4.8563	3.88925	4.47041	3.47998	3.97973	5.21305	7.239	4.27146	7.01838	3.97894	7.49925	5.00132	5.8847	3.99655	47.6078	57.7596	58.6026	43.3558	42.0639	57.3753	54.928	36.3585	59.6056	49.9142	39.1713	60.5659	35.6904	30.8637	48.6135	20.3049	32.7132	31.2284	38.7957	44.5794
	lmo1036	lmo1036	lmo1036	+	984797	2.5	1265	16.2761	12.4094	20.3257	14.8115	16.4904	12.5978	17.1423	10.4936	16.0902	10.6931	17.6228	17.4061	21.6385	11.8688	20.8256	12.048	19.1483	12.1607	20.3394	10.5795	73.2666	131.025	101.268	50.1597	54.2421	89.0619	34.3764	43.9848	86.5297	78.445	85.4097	123.15	120.297	68.5362	111.418	45.4879	103.433	74.6937	88.2463	101.355
	lmo1037	hypothetical protein	lmo1037	-	985124	2.5	803	21.373	53.6022	32.0978	27.019	22.1645	28.4545	17.6	26.0966	26.5508	26.2612	37.6351	52.9152	28.3787	33.1266	34.5771	22.2533	29.6932	34.2384	29.9959	36.058	18.0262	6.205	16.6875	0	10.6764	18.0124	18.6072	13.8519	8.51574	6.40483	8.55836	11.577	22.8009	9.90082	19.6495	5.96887	18.4697	9.74708	18.181	6.0063
	lmo1038	hypothetical protein	lmo1038	-	986325	2.5	581	53.3029	60.3303	50.7306	54.8329	55.1935	48.63	51.2724	46.5583	52.9799	47.9563	77.507	64.126	68.1693	54.6269	69.6464	57.4027	62.7952	48.3047	67.6599	55.0922	22.4119	8.57185	20.4915	5.84519	10.3242	19.551	14.0208	5.9799	11.764	3.79196	25.3348	14.6603	48.4587	10.9419	23.2668	11.7795	27.8343	7.18135	32.2921	10.668
	lmo1039	ABC transporter ATP-binding protein	lmo1039	-	986741	2.5	662	23.2807	26.933	22.0981	17.5032	32.2713	15.9713	25.877	17.334	22.938	17.8137	33.9663	31.4119	38.0307	15.9519	33.9052	19.9807	32.8962	17.2894	33.2491	20.464	13.1159	7.52461	13.491	3.42072	1.29469	18.7226	14.3592	3.14959	10.3268	5.54781	10.3785	7.01956	8.50769	4.80257	20.4243	4.13615	16.2892	5.51599	20.4728	4.16209
	lmo1040	molybdenum ABC transporter permease	lmo1040	-	986321	2.5	671	14.4829	17.5019	15.7152	16.3211	24.7161	10.5049	16.3657	9.96303	15.6754	9.45076	17.5338	21.6085	24.4376	6.6216	22.7752	10.4456	22.9163	11.3927	23.7384	8.88701	17.2536	12.9917	15.5287	3.3749	11.4962	13.8539	12.143	6.21482	5.09424	2.1894	8.77668	6.92554	14.6891	3.55369	15.113	8.16151	20.0888	7.77445	13.9836	9.23928
	lmo1041	molybdate ABC transporter substrate-binding protein	lmo1041	+	986319	2.5	770	22.9782	26.7234	11.9611	12.4816	15.6332	13.1406	17.5926	13.7435	14.0246	13.5842	24.3253	22.2207	20.0745	14.5538	19.2305	14.8545	19.6871	13.7823	18.6538	12.3332	0	0	1.93353	0	1.11333	0	3.52793	1.8056	1.48004	0	5.09981	0	3.65797	2.06492	4.39082	1.77838	3.50186	1.35524	1.35423	1.78954
	lmo1042	molybdopterin biosynthesis protein MoeA	lmo1042	+	986318	2.5	1223	18.0148	15.9213	14.704	13.8745	16.0197	13.5641	15.8736	12.4473	14.7615	11.2876	13.4998	15.0896	24.815	11.0642	20.3191	12.4183	20.1063	12.1336	20.3702	11.0373	4.73629	2.03792	10.9614	5.55866	3.50646	10.9865	6.66675	2.84338	16.781	1.80304	6.42476	0	17.2812	9.10487	14.7509	4.48083	16.5437	4.69516	16.2076	8.45424
	lmo1043	molybdopterin-guanine dinucleotide biosynthesis MobB	lmo1043	+	986316	2.5	485	9.8564	7.59569	12.0891	5.24148	9.73046	7.80065	9.80594	6.18295	10.4785	5.96071	8.89437	9.30426	16.5961	6.50194	16.2379	8.36192	14.8579	6.62823	15.2487	5.01073	0	2.56626	12.2696	0	1.76622	6.38534	5.59678	2.86444	4.69593	3.02733	2.02261	0	0	0	4.64379	2.82126	8.33312	1.07499	6.44513	1.41948
	lmo1044	molybdopterin converting factor subunit 2	lmo1044	+	986188	5.2	422	6.29132	6.90039	5.27452	6.52396	8.18025	6.64457	10.9197	5.85753	6.10202	5.39976	6.42812	7.52817	12.3683	6.86049	13.0029	7.36145	11.845	6.6264	11.7293	4.7975	0	5.89695	17.6212	2.68077	2.02927	12.2273	6.43034	6.58213	5.39532	5.21731	9.2954	3.66743	6.66737	7.52743	8.00313	6.4829	3.19141	7.41054	12.3417	4.89267
	lmo1045	molybdopterin converting factor subunit 1	lmo1045	+	985638	3.8	248	7.32868	5.5164	6.57091	5.11518	5.55863	6.03764	7.36127	4.44608	5.60328	5.59335	3.92002	5.3713	9.33834	4.14385	7.92331	6.57073	9.76523	4.70437	6.55784	4.42427	23.282	0	0	0	3.44731	20.7716	5.46192	2.79542	13.7483	5.90876	3.94774	6.23021	0	3.19689	4.53189	5.50656	5.42155	4.19633	33.5457	5.54109
	lmo1046	molybdenum cofactor biosynthesis protein MoaC	moaC	+	986305	2.1.2	482	3.30587	4.62127	3.38749	3.51602	5.37306	1.89461	2.58056	3.38354	3.75525	3.22955	2.45393	4.08766	6.92037	3.60495	4.95114	4.58938	4.72914	2.7717	4.29095	3.12114	3.00063	2.5822	9.25934	2.34776	0	17.1333	14.0789	1.44112	2.36255	6.09226	10.1759	4.81777	11.6783	1.64809	4.67263	2.83879	11.1798	7.57164	8.64688	0
	lmo1047	molybdenum cofactor biosynthesis protein A	moaA	+	984816	2.1.2	1001	6.14655	8.48208	6.60578	6.85001	9.38158	6.19719	8.56111	6.83963	6.26595	6.67182	8.83681	7.56378	12.1107	8.30243	9.78517	10.1131	14.0454	6.97255	12.6611	6.13375	2.89283	7.46829	22.3167	7.92193	3.42667	17.5501	10.8584	4.86269	12.5272	4.40503	5.88616	5.41879	5.62934	2.38331	15.7666	3.42099	9.43089	5.73541	4.16811	4.13094
	lmo1048	molybdenum cofactor biosynthesis protein B	lmo1048	-	986817	2.1.2	488	15.2381	15.8004	16.5775	16.3515	26.5356	16.9759	17.5424	15.9555	19.4018	19.937	12.5468	15.3686	20.655	17.0123	21.2732	14.0309	20.9447	14.0307	22.6043	16.7185	0	2.55052	15.2429	0	0	2.11539	2.78122	1.42344	4.66712	0	0	1.58622	8.65122	3.25573	9.2306	0	0	4.27356	8.54078	2.82154
	lmo1049	molybdopterin biosynthesis protein MoeB	lmo1049	-	986477	2.1.2	998	9.36168	6.78886	11.0923	8.92468	14.894	11.9736	10.3482	11.7678	11.8014	11.7665	8.37482	7.01273	8.36472	8.71468	11.969	9.40386	11.8011	7.41227	11.5046	8.24158	7.25378	2.49691	10.4457	4.54041	3.43696	15.5319	5.44552	1.39351	7.99576	2.94551	5.90383	3.10575	9.88093	7.96823	16.9436	4.80377	9.45921	12.0282	16.7225	9.6678
	lmo1050	hypothetical protein	lmo1050	+	986511	6	554	53.0191	58.7795	20.1002	17.0844	23.2761	11.0707	18.6268	11.7784	21.6196	10.7404	72.8609	64.0326	24.8759	10.4576	22.6213	14.0741	20.5782	13.0406	22.1794	13.0588	67.8954	53.9332	212.197	120.548	143.837	203.157	169.083	90.2997	150.092	108.689	81.4729	71.2769	238.836	83.1883	209.422	112.408	177.563	119.55	148.621	111.87
	lmo1051	peptide deformylase	def	-	986625	2.1.1	551	389.68	481.034	395.162	542.749	487.903	645.352	438.316	639.967	536.224	671.342	398.998	510.43	342.916	503.175	377.664	526.44	376.291	514.908	433.598	560.591	147.031	90.3771	48.6115	45.1944	24.8806	63.7146	49.276	26.4805	35.1429	37.3151	137.12	89.9317	45.9831	23.0732	59.284	24.8394	24.4559	20.822	39.7216	21.2459
	lmo1052	pyruvate dehydrogenase subunit E1 alpha	pdhA	+	986808	5.2	1115	379.017	795.103	3957.78	3574.77	3640.24	4163.5	4197.8	4023.56	3689.01	3833.24	283.567	615.996	3198.39	2730.94	3123.98	2596.28	2998.69	2557.28	3179.65	2397.91	11.6879	8.94053	13.358	1.0161	7.69159	14.8305	12.1865	7.48452	15.3375	3.95505	7.92733	6.25533	12.6357	10.6993	8.08918	5.52877	14.5158	5.61767	16.8405	6.79976
	lmo1053	pyruvate dehydrogenase subunit E1 beta	PdhB	+	984409	6	977	468.339	947.06	4243.31	3801.86	3710.33	4243.05	4404.57	4074.36	3833.14	3781.6	358.226	766.344	3356.21	2593.59	3165.36	2536.03	3223.22	2497.54	3239.35	2390.99	23.7105	10.2021	12.1943	3.47843	3.51076	10.577	9.73428	2.84687	24.5024	3.76094	20.102	3.17244	24.5118	8.13932	8.07677	4.20593	13.8033	3.73937	14.9464	3.52692
	lmo1054	dihydrolipoamide acetyltransferase	pdhC	+	986301	3.5.2	1634	489.415	1031.76	4326.51	3866.91	4079.78	4346.89	4547.84	4234.74	4026.63	4079.72	464.589	912.126	3528.4	2995.58	3483.8	2899.39	3401.55	2882.59	3469.01	2833.85	35.457	18.3076	37.3828	11.7905	22.5752	20.8783	19.1317	12.346	58.6258	13.498	19.8401	14.2323	18.9745	10.7111	24.8464	15.0951	16.5133	14.6987	26.1826	7.59486
	lmo1055	dihydrolipoamide dehydrogenase	PdhD	+	986542	1.3	1403	1041.31	1654.06	5344.89	5336.02	5014.2	5745.89	5762.43	5783.71	5246.97	5504.55	931.74	1450.63	4318.9	4279.9	4308.05	4206.74	4456.62	3993.58	4489.59	4016.15	18.5808	10.6599	15.9268	5.65368	3.05691	9.57802	8.71806	6.445	19.5062	12.0511	21.7042	8.28698	7.03066	5.10273	12.8597	6.83614	11.5382	5.95377	21.5664	4.91358
	lmo1056	lmo1056	lmo1056	+	986297	1.2	311	329.729	436.949	286.756	349.264	368.021	350.494	332.282	383.725	305.651	374.434	458.992	522.367	160.233	141.172	184.912	160.363	146.894	170.828	158.822	185.466	9.29042	7.9949	0	3.63451	5.50244	6.63093	8.71806	2.23096	0	0	22.0542	9.94437	0	0	7.23359	4.39466	0	0	0	0
	lmo1057	L-lactate dehydrogenase	lmo1057	+	986824	1.2	953	387.349	538.851	504.536	557.475	456.228	511.607	491.248	463.74	491.836	446.087	345.313	602.369	434.079	312.777	426.642	342.115	395.139	357.705	401.182	348.009	10.6343	5.22937	15.6263	0	1.79954	13.0116	11.4048	2.91849	9.56906	3.08444	9.27348	4.06531	8.86886	4.17204	18.9256	5.03037	22.6409	6.02398	8.75564	5.06191
	lmo1058	hypothetical protein	lmo1058	+	986292	1.2	272	412.762	523.899	480.549	539.642	410.244	499.209	440.715	468.86	468.906	481.185	288.586	545.2	371.837	332.364	351.483	330.973	335.757	313.535	345.077	341.304	5.30881	4.56851	5.46063	8.30746	0	3.78911	0	0	16.7196	0	3.60069	2.84125	0	2.91585	12.4004	2.51123	0	7.65485	3.82458	2.52698
	lmo1059	lmo1059	lmo1059	+	984717	5.2	530	559.738	820.82	728.161	781.024	661.531	708.788	683.613	682.651	651.233	660.438	636.018	974.995	649.186	479.596	661.238	563.162	611.806	599.718	605.094	531.549	10.9176	2.34878	0	2.13553	6.46615	5.84421	2.56124	1.31085	10.7449	4.15616	7.40481	8.76453	2.65565	2.99821	12.7507	2.58217	20.3385	3.93554	13.7642	1.29918
	lmo1060	transcriptional regulator	lmo1060	+	984788	2.1.1	662	15.0235	9.19348	5.60865	3.62871	4.69717	3.94353	6.08221	2.38542	6.62886	3.19302	14.0913	9.60608	4.16475	1.84809	3.78728	2.30853	4.22317	3.2812	3.78908	2.01142	17.4879	13.1681	15.7395	6.84143	1.29469	1.56022	8.20523	0	6.88452	1.10956	13.3437	10.5293	8.50769	2.40128	25.5303	2.06808	26.4699	1.576	12.5986	6.24313
	lmo1061	two-component sensor histidine kinase	lmo1061	+	986289	3.7.4	1445	13.8293	10.6866	10.4407	5.67645	7.41823	3.70668	7.19999	3.3541	6.36821	3.85268	15.3809	13.6097	8.49253	2.45289	5.70562	3.21193	5.45235	3.47181	5.64627	3.4484	3.00686	1.72504	5.15475	0.78421	1.78087	2.14611	5.64323	0.962738	2.36745	0.508741	8.83738	1.60925	5.85124	0	7.02349	0.948226	0.933586	2.89042	4.33241	1.90834
	lmo1062	ABC transporters permease	lmo1062	+	986633	6	1421	0.748587	0.664092	0.679901	0.0995217	0.973347	0.505629	0.618719	0.185365	0.833991	0.274239	0.588358	0.447878	0.766497	0.181403	1.21924	0.371152	0.569982	0.470721	0.839153	0.407744	24.4609	28.0665	63.9493	39.0748	20.5239	43.6467	47.8206	23.4957	49.753	25.8664	58.7581	64.9111	97.1833	41.9845	96.8142	40.4976	65.5046	39.6792	74.1597	53.8503
	lmo1063	ABC transporter ATP binding protein	lmo1063	+	986288	5.2	668	2.2731	1.02659	2.00101	1.79808	1.81029	0.977041	1.20553	0.394004	2.08553	0.749458	2.18853	2.28478	3.69294	0.963955	3.48522	1.26225	2.31292	1.06308	2.15918	0.693348	32.4956	35.4214	55.7083	50.8506	35.9263	58.7566	69.119	26.0112	51.1708	28.5899	80.8137	67.2471	103.284	48.7848	106.266	31.7677	56.5008	36.7038	65.5495	59.809
	lmo1064	transporter	lmo1064	-	986286	5.2	944	342.681	386.638	368.312	256.084	328.693	263.946	283.963	232.683	330.94	243.236	310.532	427.352	292.732	225.267	282.856	209.715	253.486	230.294	274.543	255.179	4.60097	7.91876	4.73255	2.39993	1.81668	2.18926	4.31752	2.20971	1.20752	1.55691	1.0402	4.10403	11.9378	0	7.1647	2.1764	9.99974	1.65855	6.62927	2.19005
	lmo1065	hypothetical protein	lmo1065	-	984607	1.7	614	108.922	190.822	228.07	209.633	231.152	216.18	203.264	200.07	250.799	231.807	104.184	223.582	267.734	260.156	271.997	259.083	258.31	255.706	295.23	274.068	16.4962	6.08392	9.69596	1.84385	1.39574	33.6399	13.2685	6.79083	7.42185	1.19616	3.19671	3.78371	13.7576	6.47175	27.5229	5.57372	13.1704	3.398	16.9774	6.7304
	lmo1066	myo-inositol-1(or 4)-monophosphatase	lmo1066	+	986059	2.1.2	773	113.66	98.3825	80.9046	73.3197	86.4317	66.1241	87.3377	73.4235	84.8127	67.9457	106.742	116.186	82.897	69.9043	82.3395	74.4617	77.491	62.0503	80.8175	63.5247	28.0873	8.05688	23.1125	17.5809	12.1992	30.7387	29.8712	8.99302	20.6402	17.1079	24.1302	17.0365	14.5752	8.22766	26.2428	14.1719	20.9297	12.1498	18.8857	17.826
	lmo1067	GTP-binding elongation factor	lmo1067	+	986279	1.2	1838	2444.49	1793.4	1873.38	1463.14	2061.06	1570.8	1665.63	1519.5	2083.19	1512.74	2568.13	2031.65	1649.26	2191.17	1860.03	1778.35	1518.26	1723.55	1736.86	2355.76	7.88094	8.81656	17.0233	8.01608	3.73412	14.0623	4.43725	3.78499	14.2716	4.80026	8.01785	5.90498	16.8696	9.52288	19.0221	8.20146	8.80891	7.95455	18.1683	7.12749
	lmo1068	lmo1068	lmo1068	+	985811	1.1	860	430.071	521.176	408.478	590.817	379.649	457.397	417.769	479.297	365.981	459.589	525.858	644.946	347.875	295.779	310.868	352.956	307.569	383.806	299.942	330.244	43.7653	56.4936	183.531	215.994	115.647	92.5096	140.583	86.5022	131.208	88.0034	31.9671	70.2689	144.127	27.7361	106.16	51.7559	92.5063	60.6787	94.5884	44.8694
	lmo1069	hypothetical protein	lmo1069	-	986276	1.1	242	182.109	539.117	514.78	415.533	434.786	275.982	303.531	239.074	324.403	306.518	307.573	1098.16	469.774	117.831	402.749	254.984	270.475	268.056	295.67	196.373	608.351	313.084	509.187	149.329	102.441	166.019	218.274	63.0178	187.837	102.929	513.743	555.412	249.533	49.1374	208.971	53.604	144.441	64.4992	137.496	73.8129
	lmo1070	hypothetical protein	lmo1070	+	986295	1.1	281	1815.94	2125.83	659.579	971.318	863.017	802.68	749.822	840.306	850.737	819.842	1856.74	1805.63	523.077	503.331	569.017	597.213	534.072	504.249	537.62	508.467	10.2788	30.959	37.0045	16.0846	9.13172	33.0136	33.7593	9.87319	36.4184	7.82596	34.8577	38.508	10.0011	11.2911	56.0219	9.72436	38.2969	14.8211	37.0252	7.339
	lmo1071	cell division protein FtsW	lmo1071	+	986183	1.1	1202	328.916	316.492	228.058	206.574	189.791	195.603	197.77	175.463	210.153	180.096	428.87	527.083	186.643	146.989	185.915	126.175	172.479	158.091	178.545	155.34	22.8901	14.5144	22.3055	11.3114	12.1301	18.9172	18.0883	5.78603	23.7138	11.0071	13.8909	9.67158	19.9273	10.5872	25.3266	8.54822	16.8325	11.7257	24.3018	8.60182
	lmo1072	pyruvate carboxylase	pycA	+	986269	1.1	3440	641.028	608.028	667.413	637.703	657.859	667.013	674.268	718.178	649.622	704.798	723.058	716.1	720.325	644.043	706.179	659.669	706.317	624.053	705.481	651.628	23.5865	14.8606	32.9257	20.4318	18.7093	27.3562	26.0858	13.9576	26.8613	15.6064	17.7115	11.4963	31.1454	11.7981	35.4175	11.1572	25.893	13.3609	27.6123	14.8358
	lmo1073	metal ABC transporter substrate-binding protein	lmo1073	+	986508	5.2	899	118.108	138.312	94.2029	73.7476	85.8013	68.3417	88.5521	60.684	100.223	64.3757	117.285	116.762	103.909	73.0154	106.218	70.7809	83.9988	68.8424	91.4844	70.415	20.9344	9.70048	114.291	41.5788	23.8439	51.7213	37.7783	15.468	46.9123	23.704	21.8442	43.9541	57.9728	14.1516	57.6759	11.4261	32.9991	15.0928	30.1632	20.696
	lmo1074	teichoic acid translocation permease TagG	lmo1074	+	986267	1.1	803	151.786	164.117	211.92	89.594	103.65	73.1687	115.175	64.5203	106.984	63.9553	186.701	228.85	115.503	46.5216	102.393	57.4386	66.2598	59.1106	70.0686	55.5293	16.2236	15.5125	24.1042	5.64163	5.33819	10.2928	10.1494	2.59724	14.1929	6.40483	13.4488	10.6123	19.2931	7.92066	7.01767	3.41078	13.4325	7.14786	22.077	6.0063
	lmo1075	teichoic acid ABC transporter ATP-binding protein	lmo1075	+	986506	1.1	1001	344.055	356.162	444.963	269.269	279.836	186.372	278.785	182.618	290.322	181.529	425.002	442.259	261.068	143.008	249.104	159.387	182.296	165.254	192.862	152.649	14.4641	7.46829	11.9022	6.79023	2.57	8.25889	9.50112	2.08401	7.97183	5.1392	4.90513	9.28935	11.2587	5.56106	18.019	4.78939	14.82	4.1712	16.6724	3.44245
	lmo1076	autolysin	lmo1076	+	986264	1.1	1718	410.961	353.684	341.612	312.719	313.717	310.013	333.536	316.307	340.201	325.314	379.508	348.341	205.057	220.027	210.169	211.449	182.386	202.022	192.065	202.816	53.959	39.1792	60.7055	28.3657	18.9753	30.6898	26.1085	23.4854	44.4761	27.3886	45.747	40.1593	37.7352	12.503	32.1661	11.5657	33.7688	11.853	28.5475	20.0659
	lmo1077	teichoic acid biosynthesis protein B	lmo1077	+	986263	1.1	1688	235.758	220.646	171.506	102.307	120.361	83.0112	113.862	81.4956	118.788	79.7879	253.33	310.372	112.244	63.305	104.526	65.5895	75.6463	71.2365	83.1065	70.8545	10.297	9.59956	11.4741	9.39938	7.11506	7.34938	12.8835	5.76959	11.4854	8.71095	5.81994	8.72561	19.2027	3.2991	10.0217	6.08852	7.19342	4.94914	9.89092	3.26757
	lmo1078	UDP-glucose pyrophosphorylase	lmo1078	-	984367	1.1	872	336.279	454.911	224.731	269.017	222.095	255.317	212.732	248.734	227.902	263.425	381.665	454.792	172.546	169.236	180.725	186.324	158.001	188.618	179.851	202.901	23.242	31.4301	56.3515	27.2776	26.5479	21.3284	42.0624	13.5544	30.0636	19.3811	7.88192	8.885	25.8447	6.3828	18.0964	10.2089	15.4635	12.5674	14.352	2.37067
	lmo1079	hypothetical protein	lmo1079	+	986262	1.1	2858	168.32	137.677	163.907	115.359	115.18	81.8022	146.149	76.5781	118.903	73.1495	198.529	156.603	126.749	72.045	118.587	67.9337	101.569	72.3448	103.751	56.0749	15.7148	13.0871	30.2426	16.6585	14.4114	20.2616	19.0279	11.9297	19.1582	10.5496	13.0653	14.9218	31.5668	10.5803	35.5228	12.2294	16.5263	15.3499	25.1989	11.8235
	lmo1080	teichoic acid biosynthesis protein GgaB	lmo1080	+	986254	2.1	1871	284.482	350.367	302.409	258.621	217.436	202.866	268.324	186.033	234.362	184.717	250.018	313.168	248.657	136.9	224.162	153.964	192.119	152.502	189.251	134.701	3.09681	7.32866	14.3342	6.05752	1.83415	4.9732	5.08554	1.85913	7.92437	1.96485	10.502	5.38653	19.5854	3.40182	9.04199	3.296	7.21135	3.06991	10.5973	3.31666
	lmo1081	glucose-1-phosphate thymidyl transferase	lmo1081	+	986258	2.1	866	365.88	338.742	378.802	271.94	299.995	256.33	369.805	248.084	291.193	212.815	329.463	331.003	320.911	169.887	293.271	180.613	257.848	190.889	263.168	165.451	6.68653	2.87706	12.0361	2.61584	1.98012	4.77244	3.1373	3.21135	6.58079	0.848489	3.40134	0.894649	9.75882	9.18138	13.0155	1.58147	6.22821	1.80776	10.8385	3.97847
	lmo1082	dTDP-sugar epimerase	lmo1082	+	986259	1.1	560	272.019	179.196	252.675	163.593	236.029	173.722	254.719	169.336	224.205	147.169	243.835	198.785	224.08	115.873	202.587	134.344	192.285	131.397	199.831	119.27	5.16687	0	10.6293	4.04267	1.53009	3.68779	9.6971	1.24075	8.13626	7.86781	7.00883	4.14792	20.1091	2.83788	16.0918	6.11022	9.62542	4.65636	14.8893	6.14854
	lmo1083	dTDP-D-glucose 4,6-dehydratase	lmo1083	+	986257	1.1	986	217.166	208.838	369.367	200.952	244.122	156.423	291.416	146.296	221.934	133.828	275.067	274.176	327.761	115.322	279.057	151.596	231.426	155.855	236.962	130.003	5.87358	8.84542	1.51039	0	0	1.04805	1.37793	1.41046	6.93684	0	5.97561	3.14351	4.28617	0	1.1433	2.08379	0	3.17595	7.40504	2.09686
	lmo1084	DTDP-L-rhamnose synthetase	lmo1084	+	986256	1.1	830	287.122	228.827	412.843	272.14	271.629	214.577	337.123	213.091	283.577	193.543	315.042	318.672	347.668	175.462	315.688	197.583	277.442	204.595	277.29	181.619	1.74405	0	3.58785	0	0	4.97919	1.6366	1.67523	4.11953	2.65574	3.54869	0	5.09079	0.957913	2.71586	1.64998	3.24901	0	1.25645	0.830164
	lmo1085	teichoic acid biosynthesis protein B	lmo1085	+	986253	1.1	2090	108.253	135.076	116.02	84.4652	87.4026	69.3966	89.4125	58.8947	92.4474	59.1466	128.271	157.378	87.5025	49.5307	84.0878	49.6732	64.6269	56.3807	68.8411	53.9883	8.31739	4.17524	7.12938	2.16924	1.64205	5.44174	1.30083	0.332884	3.27435	1.05544	9.40209	12.6124	11.4646	1.52277	8.63465	1.63933	5.81047	1.74897	4.49402	1.97953
	lmo1086	2-C-methyl-D-erythritol 4-phosphate cytidylyltransferase	ispD	+	986270	5.2	710	664.104	774.21	677.705	594.941	504.437	490.736	558.6	474.312	500.395	472.161	726.327	938.932	557.295	313.736	522.341	350.887	436.813	392.522	433.974	327.5	6.11521	5.26247	4.1934	4.78467	3.62186	8.72933	0	3.91595	6.41975	3.10397	23.5032	10.9094	5.95	1.11959	3.17424	1.92846	0	0.734801	4.40553	1.94055
	lmo1087	glucitol dehydrogenase	lmo1087	+	985892	2.5	1025	848.984	804.018	647.808	676.012	572.942	621.723	642.285	626.55	589.908	588.373	891.075	880.277	542.855	450.163	526.12	461.986	519.516	494.847	500.534	460.968	1.41258	0	7.26488	1.10523	0	8.0657	7.95332	2.71368	3.33658	2.86799	4.79039	6.04804	12.3697	2.32756	16.4977	3.34097	9.21029	5.09204	15.2648	3.36192
	lmo1088	teichoic acid biosynthesis protein B	tagB	+	986255	5.2	1160	55.0779	70.3947	114.855	57.7172	68.2015	47.0666	78.8124	41.593	61.4689	35.9402	61.4933	95.9439	106.336	32.6054	85.1202	38.231	71.8426	44.5739	72.2164	34.2094	4.9933	3.22275	7.70415	3.90687	0.739346	4.45489	2.34284	0.599535	0.982868	1.90088	0.846674	7.34907	8.50219	0.685638	14.5793	1.77149	3.48828	4.94994	4.4966	2.3768
	lmo1089	glycerol-3-phosphate cytidylyltransferase	tagD	+	986249	1.2	383	116.231	136.375	142.544	102.639	100.624	88.5138	120.67	72.7615	114.451	78.1967	127.821	133.347	135.866	68.3512	124.085	72.2946	105.152	78.1144	105	69.3057	3.77423	0	7.76434	2.95304	2.23537	18.8567	3.54171	5.43797	17.8298	5.74719	2.55987	2.01995	47.7394	2.07298	23.5092	1.78533	7.03107	4.08159	21.7523	1.79653
	lmo1090	glycosyltransferase	lmo1090	+	986248	2.3	983	124.252	131.304	162.195	117.358	108.367	92.2669	131.66	92.2561	110.384	78.9787	123.003	137.215	161.795	82.5769	139.681	87.2658	125.052	91.1534	116.098	76.837	20.6202	10.1399	19.6949	4.60962	4.36169	19.9737	17.9677	2.82951	10.437	2.99041	13.9856	10.2476	38.6931	7.28072	16.0551	3.48357	12.3472	3.18563	23.3439	6.30975
	lmo1091	glysosyltransferase	lmo1091	+	986251	4.4	1013	105.579	109.131	129.159	101.813	86.8474	81.8662	105.277	80.6884	93.4961	77.7409	113.588	117.955	126.983	69.5765	116.976	77.2409	103.331	77.1519	93.0911	68.7884	18.5808	14.7598	35.2841	5.59156	5.07918	29.5842	10.7299	7.55095	24.7578	7.98032	18.4189	19.1238	38.939	3.14014	30.0472	5.40881	11.9819	7.21322	15.4454	6.12307
	lmo1092	nicotinate phosphoribosyltransferase	lmo1092	+	986245	4.4	1490	116.424	128.457	141.21	124.767	155.839	107.8	143.293	116.785	139.99	118.743	140.516	157.747	240.995	151.079	215.042	169.838	226.387	158.98	209.136	141.55	9.72036	7.5284	11.998	9.1265	2.30283	13.1818	11.858	5.60209	9.94931	3.45371	9.88922	7.80343	19.8613	15.4827	28.0029	11.9549	28.0677	10.1615	25.9102	12.9552
	lmo1093	NAD synthetase	nadE	+	986246	4.4	824	65.8049	66.9102	61.57	53.1772	117.089	76.2184	81.05	93.9974	75.1727	95.6857	107.496	84.8406	123.661	101.149	150.151	126.219	169.962	108.975	158.723	122.709	7.02694	4.53529	7.22789	0	2.08092	11.2846	3.29701	1.68742	5.53265	0	19.064	19.7441	13.6742	10.6137	21.8849	6.64792	21.2722	6.33265	3.79677	10.8706
	lmo1094	lmo1094	lmo1094	+	986243	1.2	308	133.123	137.525	133.097	133.505	173.572	135.593	148.535	158.836	156.906	157.934	117.329	107.384	146.974	94.5415	156.138	144.328	178.127	107.499	171.136	117.088	4.69031	8.07252	9.64889	0	0	3.34766	8.8027	0	18.4646	0	0	7.53069	9.12718	2.57614	3.65191	4.43733	4.36882	5.07226	10.137	6.69773
	lmo1095	PTS cellbiose transporter subunit IIB	lmo1095	+	986241	1.6	404	37.1727	41.9706	46.6424	45.0767	59.9491	49.709	59.1977	47.2507	46.335	48.5569	49.0625	48.7491	56.1576	38.5339	56.9803	44.8286	54.0343	37.7034	63.8894	35.7909	0	0	0	5.59984	0	7.66241	0	0	0	0	4.85426	0	3.48185	3.93099	0	0	0	2.57997	5.1561	3.40675
	lmo1096	GMP synthase	guaA	+	986238	4.2	1556	1256.21	819.508	708.027	673.469	695.828	717.577	694.757	794.762	749.314	836.898	917.56	714.07	362.386	429.924	378.37	359.784	311.248	353.088	371.459	422.626	15.8241	4.80618	11.4894	3.64151	4.41044	9.96557	15.7227	1.78821	10.2605	5.66967	15.7834	5.97812	19.0194	7.66884	20.2931	8.36594	13.8725	10.0663	24.1413	9.30455
	lmo1097	integrase	lmo1097	-	986237	4.4	1202	0	0	0	0	0	0	0	0	0	0	0	0	0	0	0	0	0	0	0	0	0	0	0	0	0	0	0	0	0	0	0	0	0	0	0	0	0	0	0	0
	lmo1097a	hypothetical protein	lmo1097a	-	16695813	1.1	200	0	0	0	0	0	0	0	0	0	0	0	0	0	0	0	0	0	0	0	0	0	0	0	0	0	0	0	0	0	0	0	0	0	0	0	0	0	0	0	0
	lmo1098	hypothetical protein	lmo1098	-	986233	4.4	230	0	0	0	0	0	0	0	0	0	0	0	0	0	0	0	0	0	0	0	0	0	0	0	0	0	0	0	0	0	0	0	0	0	0	0	0	0	0	0	0
	lmo1099	hypothetical protein	lmo1099	-	986219	4.4	419	0	0	0	0	0	0	0	0	0	0	0	0	0	0	0	0	0	0	0	0	0	0	0	0	0	0	0	0	0	0	0	0	0	0	0	0	0	0	0	0
	lmo1100	cadmium resistance protein	cadA	-	986725	4.4	2123	0	0	0	0	0	0	0	0	0	0	0	0	0	0	0	0.0248483	0	0	0	0	0	0	0	0	0	0	0	0	0	0	0	0	0	0	0	0	0	0	0	0
	lmo1101	lipoprotein signal peptidase	lmo1101	+	986228	4.4	500	0	0	0	0	0	0	0	0	0	0	0	0	0	0	0	0	0	0	0	0	0	0	0	0	0	0	0	0	0	0	0	0	0	0	0	0	0	0	0	0
	lmo1102	cadmium efflux system accessory protein	lmo1102	-	987644	4.4	335	0	0	0	0	0	0	0	0	0	0	0	0	0	0	0	0	0	0	0	0	0	0	0	0	0	0	0	0	0	0	0	0	0	0	0	0	0	0	0	0
	lmo1103	hypothetical protein	lmo1103	-	986226	5.2	917	0	0	0	0	0	0	0	0	0	0	0	0	0	0	0	0	0	0	0	0	0	0	0	0	0	0	0	0	0	0	0	0	0	0	0	0	0	0	0	0
	lmo1104	P60 protein	lmo1104	-	986227	4.4	1010	0	0	0	0	0	0	0	0	0	0	0	0	0	0	0	0	0	0	0	0	0	0	0	0	0	0	0	0	0	0	0	0	0	0	0	0	0	0	0	0
	lmo1105	hypothetical protein	lmo1105	-	986240	4.4	2159	0	0	0	0	0	0	0	0	0	0	0	0	0	0	0	0	0	0	0	0	0	0	0	0	0	0	0	0	0	0	0	0	0	0	0	0	0	0	0	0
	lmo1106	hypothetical protein	lmo1106	-	986235	4.4	2450	0	0	0	0	0	0	0	0	0	0	0.0853371	0.259846	0.17788	0.0263111	0.0975683	0	0.0300625	0.0682747	0.128119	0	0	0	0	0	0	0	0	0	0	0	0.802112	0.632934	1.15067	0	0.9208	0.279709	1.10156	0	0.425994	0.281463
	lmo1107	hypothetical protein	lmo1107	-	986244	4.4	395	0	0	0	0	0	0	0	0	0	0	0	0	0	0	0	0	0	0	0	0	0	0	0	0	0	0	0	0	0	0	0	0	0	0	0	0	0	0	0	0
	lmo1108	hypothetical protein	lmo1108	-	986222	1.8	500	0	0	0	0	0	0	0	0	0	0	0	0	0	0	0	0	0	0	0	0	0	0	0	0	0	0	0	0	0	0	0	0	0	0	0	0	0	0	0	0
	lmo1109	hypothetical protein	lmo1109	-	986220	3.5.2	221	0	0	0	0	0	0	0	0	0	0	0	0	0	0	0	0	0	0	0	0	0	0	0	0	0	0	0	0	0	0	0	0	0	0	0	0	0	0	0	0
	lmo1110	hypothetical protein	lmo1110	-	986532	6	290	0	0	0	0	0	0	0	0	0	0	0	0	0	0	0	0	0	0	0	0	0	0	0	0	0	0	0	0	0	0	0	0	0	0	0	0	0	0	0	0
	lmo1111	hypothetical protein	lmo1111	-	986218	6	1184	0	0	0	0	0	0	0	0	0	0	0	0	0	0	0	0	0	0	0	0	0	0	0	0	0	0	0	0	0	0	0	0	0	0	0	0	0	0	0	0
	lmo1112	hypothetical protein	lmo1112	-	986216	3.2	1400	0	0	0	0	0	0	0	0	0	0	0	0	0	0	0	0	0	0	0	0	0	0	0	0	0	0	0	0	0	0	0	0	0	0	0	0	0	0	0	0
	lmo1113	hypothetical protein	lmo1113	-	986214	5.1	374	0	0	0	0	0	0	0	0	0	0	0	0	0	0	0	0	0	0	0	0	0	0	0	0	0	0	0	0	0	0	0	0	0	0	0	0	0	0	0	0
	lmo1114	hypothetical protein	lmo1114	-	986213	6	314	0	0	0	0	0	0	0	0	0	0	0	0	0	0	0	0	0	0	0	0	0	0	0	0	0	0	0	0	0	0	0	0	0	0	0	0	0	0	0	0
	lmo1115	fibrinogen-binding protein	lmo1115	-	986211	5.1	2588	0	0	0	0	0	0	0	0	0	0	0	0	0	0	0	0	0	0	0	0	0	0	0	0	0	0	0	0	0	0	0	0	0	0	0	0	0	0	0	0
	lmo1116	regulatory protein	lmo1116	+	986570	5.1	773	7.95716	7.98595	11.5303	4.7539	6.10983	4.13803	6.4414	3.1331	4.77691	3.31091	0	0	0	0	0	0	0	0	0	0	11.2349	4.83413	19.2604	2.93015	8.87216	6.68234	5.27139	1.7986	5.89721	0.950439	0	0	0	0	0	0	0	0	0	0
	lmo1117	lmo1117	lmo1117	+	986210	5.1	356	23.2152	40.3995	61.4548	40.236	41.355	28.9286	41.4854	25.5467	35.7598	24.6558	7.03063	6.24395	4.27435	2.34832	5.52634	1.77404	1.03198	1.6406	3.69435	2.5986	0	0	8.35156	0	0	2.89755	0	0	0	0	104.632	173.818	86.9	20.0679	85.3443	46.0885	41.5956	17.5611	55.5689	21.2564
	lmo1118	lmo1118	lmo1118	-	986207	5.2	1517	0	0	0	0	0	0	0	0	0	0	0	0	0	0	0	0	0	0	0	0	0	0	0	0	0	0	0	0	0	0	0	0	0	0	0	0	0	0	0	0
	lmo1119	methylase	lmo1119	-	985160	5.2	857	0	0	0	0	0	0	0	0	0	0	0	0	0	0	0	0	0	0	0	0	0	0	0	0	0	0	0	0	0	0	0	0	0	0	0	0	0	0	0	0
[truncated: 1,929 more rows]
