# Supplementary material for: Initial Transcriptomic Response and Adaption of Listeria monocytogenes to Desiccation on Food Grade Stainless Steel
Source: Front Microbiol. 2020 Jan 22;10:3132. doi: 10.3389/fmicb.2019.03132 (PMC6987299; doi:10.3389/fmicb.2019.03132)
Supplement: Supplementary file 6 [file Table_2.xlsx]

## Sheet: Differentially expressed genes
Table S2. Strain dependent differential gene expression analysis in Lm568 and Lm 08-5578 in response to desiccation stress
Listeria monocytogenes 568									Lm 08-5578
EGD-e ORF	Gene Description	Abbr.	Identifier	Fold change	Log fold change	P-value	Adjusted p-value		EGD-e ORF	Gene Description	Name	Identifier	Fold change	Log fold change	P-value	Adjusted p-value
lmo0013	AA3-600 quinol oxidase subunit II	qoxA	984936	5.31	2.41	0	0		lmo0003	hypothetical protein	lmo0003	984420	2.13	1.09	3.17e-05	0.000153
lmo0014	AA3-600 quinol oxidase subunit I	qoxB	984962	4.23	2.08	1.03e-07	1.6e-06		lmo0013	AA3-600 quinol oxidase subunit II	qoxA	984936	8.13	3.02	0	0
lmo0015	AA3-600 quinol oxidase subunit III	qoxC	984980	4.32	2.11	0	0		lmo0014	AA3-600 quinol oxidase subunit I	qoxB	984962	5.58	2.48	2.11e-13	2.69e-12
lmo0016	quinol oxidase aa3-600 subunit IV	qoxD	984983	4.3	2.1	2.22e-16	1.01e-14		lmo0015	AA3-600 quinol oxidase subunit III	qoxC	984980	5.04	2.33	0	0
lmo0018	beta-glucosidase	lmo0018	984990	2.09	1.06	0.000266	0.00182		lmo0016	quinol oxidase aa3-600 subunit IV	qoxD	984983	4.42	2.14	0	0
lmo0027	PTS beta-glucoside transporter subunit IIABC	lmo0027	985074	-3.2	-1.68	4.2e-06	4.67e-05		lmo0019	lmo0019	lmo0019	985005	22.01	4.46	0	0
lmo0048	sensor histidine kinase AgrB	lmo0048	985598	2.17	1.12	0.00555	0.02		lmo0025	phosphoheptose isomerase	lmo0025	985061	2.99	1.58	8.86e-06	4.78e-05
lmo0049	lmo0049	lmo0049	985690	2.35	1.24	0.000219	0.00154		lmo0027	PTS beta-glucoside transporter subunit IIABC	lmo0027	985074	-4.16	-2.06	1.51e-14	2.13e-13
lmo0096	PTS mannose transporter subunit IIAB	lmo0096	986611	-2.48	-1.31	4.51e-10	1.03e-08		lmo0033	endoglucanase	lmo0033	985131	2.51	1.33	0.00948	0.02
lmo0097	PTS mannose transporter subunit IIC	lmo0097	986614	-2.5	-1.32	3.84e-07	5.34e-06		lmo0034	PTS cellbiose transporter subunit IIC	lmo0034	985136	2.16	1.11	0.00327	0.00991
lmo0098	PTS mannose transporter subunit IID	lmo0098	986620	-2.2	-1.14	3.94e-08	6.65e-07		lmo0035	glucosamine--fructose-6-phosphate aminotransferase	lmo0035	985145	2.34	1.23	5.63e-06	3.17e-05
lmo0109	AraC family transcriptional regulator	lmo0109	986650	-2.8	-1.48	3.05e-07	4.35e-06		lmo0036	putrescine carbamoyltransferase	lmo0036	985152	2.24	1.16	0.02	0.04
lmo0110	lipase	lmo0110	986652	-2.14	-1.09	6.34e-05	0.00051		lmo0037	amino acid transporter	lmo0037	985153	3.32	1.73	3.89e-05	0.000183
lmo0113	hypothetical protein	lmo0113	986656	4.58	2.19	0	0		lmo0038	agmatine deiminase 1	lmo0038	985162	3.27	1.71	2.68e-05	0.000132
lmo0114	repressor C1	lmo0114	986659	5.48	2.46	0	0		lmo0039	carbamate kinase	lmo0039	985163	2.96	1.57	9.73e-08	7.04e-07
lmo0115	hypothetical protein	lmaD	986665	5.4	2.43	1.41e-09	2.91e-08		lmo0042	DedA protein	lmo0042	985331	-2.34	-1.22	9.45e-08	6.87e-07
lmo0116	hypothetical protein	lmaC	986666	4.21	2.07	1.52e-07	2.26e-06		lmo0043	arginine deiminase	lmo0043	985417	34.16	5.09	0	0
lmo0117	antigen B	lmaB	986670	2.31	1.21	0.00133	0.00701		lmo0076	O6-methylguanine-DNA methyltransferase	lmo0076	986519	2.07	1.05	2.12e-07	1.48e-06
lmo0118	antigen A	lmaA	986672	2.49	1.32	0.0016	0.00817		lmo0091	ATP synthase subunit gamma	lmo0091	986593	2.01	1.01	0.00642	0.02
lmo0119	lmo0119	lmo0119	986674	3.41	1.77	0.00119	0.00637		lmo0092	ATP synthase F0F1 subunit beta	lmo0092	986598	2.44	1.29	0.000385	0.00144
lmo0120	lmo0120	lmo0120	986675	2.96	1.57	0.00539	0.02		lmo0111	lmo0111	lmo0111	986654	-2.07	-1.05	2.23e-05	0.000111
lmo0121	phage tail protein	lmo0121	986683	3.02	1.6	0.00206	0.01		lmo0114	repressor C1	lmo0114	986659	2.4	1.26	1.72e-10	1.69e-09
lmo0122	hypothetical protein	lmo0122	986687	2.74	1.46	0.00133	0.00701		lmo0115	hypothetical protein	lmaD	986665	6.31	2.66	3.63e-08	2.77e-07
lmo0123	hypothetical protein	lmo0123	986689	2.97	1.57	0.000648	0.00384		lmo0116	hypothetical protein	lmaC	986666	5.43	2.44	1.34e-08	1.09e-07
lmo0124	lmo0124	lmo0124	986692	2.74	1.45	0.000836	0.00476		lmo0117	antigen B	lmaB	986670	4.35	2.12	9.54e-07	5.97e-06
lmo0125	lmo0125	lmo0125	986693	2.62	1.39	0.00182	0.00914		lmo0118	antigen A	lmaA	986672	4.05	2.02	2.33e-06	1.39e-05
lmo0126	lmo0126	lmo0126	986697	2.14	1.1	0.01	0.04		lmo0119	lmo0119	lmo0119	986674	4.95	2.31	6.27e-05	0.000283
lmo0128	hypothetical protein	lmo0128	986706	2.62	1.39	0.00712	0.03		lmo0120	lmo0120	lmo0120	986675	4.8	2.26	6.76e-05	0.000302
lmo0133	hypothetical protein	lmo0133	986735	-2.72	-1.45	0.01	0.04		lmo0121	phage tail protein	lmo0121	986683	4.74	2.25	8.52e-05	0.00037
lmo0134	hypothetical protein	lmo0134	986737	-3.09	-1.63	2.53e-06	2.97e-05		lmo0122	hypothetical protein	lmo0122	986687	5.34	2.42	7.38e-06	4.08e-05
lmo0136	peptide ABC transporter permease	lmo0136	986752	2.51	1.33	7.06e-10	1.55e-08		lmo0123	hypothetical protein	lmo0123	986689	5.44	2.44	1.43e-05	7.37e-05
lmo0137	peptide ABC transporter permease	lmo0137	986757	3.43	1.78	0	0		lmo0124	lmo0124	lmo0124	986692	5.31	2.41	4.25e-07	2.81e-06
lmo0139	lmo0139	lmo0139	986775	4.71	2.24	0.01	0.04		lmo0125	lmo0125	lmo0125	986693	4.77	2.25	6.21e-06	3.47e-05
lmo0153	zinc ABC transporter substrate-binding protein	lmo0153	986823	2.87	1.52	0.000289	0.00196		lmo0126	lmo0126	lmo0126	986697	4.88	2.29	2.85e-06	1.67e-05
lmo0183	alpha-glucosidase	lmo0183	987006	2.2	1.14	3.34e-10	7.72e-09		lmo0127	hypothetical protein	lmo0127	986705	4.48	2.16	0.000599	0.00213
lmo0184	oligo-1,6-glucosidase	lmo0184	987008	2.68	1.42	8.95e-13	2.88e-11		lmo0128	hypothetical protein	lmo0128	986706	4.48	2.16	0.000142	0.000581
lmo0207	Uncharacterized lipoprotein Lmo0207 precursor.	lmo0207	987038	-2.51	-1.33	2.8e-06	3.23e-05		lmo0129	N-acetylmuramoyl-L-alanine amidase	lmo0129	986713	4.15	2.05	3.93e-05	0.000184
lmo0208	hypothetical protein	lmo0208	987041	-2.69	-1.43	3.16e-10	7.37e-09		lmo0133	hypothetical protein	lmo0133	986735	20.76	4.38	0	0
lmo0210	L-lactate dehydrogenase	ldh	987043	-2.32	-1.22	0.00687	0.03		lmo0134	hypothetical protein	lmo0134	986737	13.55	3.76	0	0
lmo0229	CtsR family transcriptional regulator	lmo0229	987186	2.23	1.16	0.00092	0.0051		lmo0137	peptide ABC transporter permease	lmo0137	986757	2.11	1.07	0.000802	0.00279
lmo0230	hypothetical protein	lmo0230	987194	2.03	1.02	0.000489	0.00308		lmo0142a	hypothetical protein	lmo0142a	16695797	-2.06	-1.05	0.01	0.03
lmo0231	ATP:guanido phosphotransferase	lmo0231	987202	2.03	1.02	0.00503	0.02		lmo0144	lmo0144	lmo0144	986795	-2.28	-1.19	0.001	0.00343
lmo02333	hypothetical protein	lmo02333	984719	-2.66	-1.41	3.71e-07	5.17e-06		lmo0146	hypothetical protein	lmo0146	986800	-2.34	-1.23	0.00653	0.02
lmo0241	hypothetical protein	lmo0241	987267	2.14	1.1	0.000683	0.00401		lmo0147	lmo0147	lmo0147	986802	-2.24	-1.17	0.00276	0.0086
lmo0250	50S ribosomal protein L10	rplJ	987306	2.41	1.27	0.000254	0.00175		lmo0168	AbrB family transcriptional regulator	lmo0168	986889	-2.3	-1.2	1.19e-06	7.37e-06
lmo0251	50S ribosomal protein L7/L12	rplL	987315	2.54	1.35	0.00011	0.000828		lmo0169	glucose transporter	lmo0169	986890	69.46	6.12	0	0
lmo0256	hypothetical protein	lmo0256	987337	-2.11	-1.08	9.91e-06	0.000101		lmo0170	lmo0170	lmo0170	986891	6.24	2.64	0	0
lmo0263	internalin H	inlH	987355	-2.56	-1.36	1.6e-07	2.35e-06		lmo0176	glucose transporter	lmo0176	986935	-2.36	-1.24	1.85e-08	1.48e-07
lmo0265	succinyl-diaminopimelate desuccinylase	lmo0265	987360	-2.65	-1.41	2.47e-07	3.61e-06		lmo0200	listeriolysin positive regulatory protein	prfA_1	987031	3.11	1.64	1.89e-14	2.63e-13
lmo0266	transcriptional regulator	lmo0266	987368	2.93	1.55	6.98e-09	1.32e-07		lmo0207	Uncharacterized lipoprotein Lmo0207 precursor.	lmo0207	987038	-2.28	-1.19	9.76e-07	6.1e-06
lmo0279	anaerobic ribonucleoside triphosphate reductase	lmo0279	987434	-8.46	-3.08	0	0		lmo0208	hypothetical protein	lmo0208	987041	-2.03	-1.02	1.05e-05	5.6e-05
lmo0280	anaerobic ribonucleotide reductase activator protein	lmo0280	987436	-6.52	-2.7	7.77e-16	3.44e-14		lmo0210	L-lactate dehydrogenase	ldh	987043	-2.08	-1.06	3e-05	0.000145
lmo0294	LysR family transcriptional regulator	lmo0294	987457	-2.64	-1.4	4.34e-07	5.92e-06		lmo0211	50S ribosomal protein L25	ctc	987044	5.69	2.51	0	0
lmo0335	lmo0335	lmo0335	987570	2.04	1.03	0.01	0.04		lmo0229	CtsR family transcriptional regulator	lmo0229	987186	4.23	2.08	3.26e-08	2.51e-07
lmo0355	fumarate reductase subunit A	lmo0355	987602	-3.01	-1.59	9.44e-10	1.99e-08		lmo0230	hypothetical protein	lmo0230	987194	5.01	2.32	4.41e-13	5.4e-12
lmo0361	membrane protein	lmo0361	987609	3.51	1.81	2.26e-06	2.67e-05		lmo0231	ATP:guanido phosphotransferase	lmo0231	987202	5.1	2.35	3.41e-10	3.28e-09
lmo0368	hypothetical protein	lmo0368	987618	-2.07	-1.05	3.95e-07	5.44e-06		lmo0232	endopeptidase Clp ATP-binding chain C	clpC	987203	2.67	1.42	3.33e-12	3.75e-11
lmo0375	lmo0375	lmo0375	987629	2.5	1.32	1.71e-05	0.000167		lmo0245	preprotein translocase subunit SecE	secE	987283	-2.46	-1.3	3.54e-08	2.71e-07
lmo0378	lmo0378	lmo0378	987634	2.22	1.15	0.00958	0.04		lmo0250	50S ribosomal protein L10	rplJ	987306	2.84	1.5	0.00033	0.00126
lmo0389	low temperature requirement protein A	ltrA	987647	2.45	1.29	1.03e-06	1.32e-05		lmo0251	50S ribosomal protein L7/L12	rplL	987315	2.85	1.51	0.000242	0.000944
lmo0394	P60 protein	lmo0394	987653	-5.86	-2.55	0	0		lmo0256	hypothetical protein	lmo0256	987337	-2.26	-1.17	2.62e-09	2.35e-08
lmo0395	blasticidin S-acetyltransferase	lmo0395	987654	-2.3	-1.2	0.000186	0.00133		lmo0263	internalin H	inlH	987355	26.89	4.75	0	0
lmo0412	lmo0412	lmo0412	987812	-6.92	-2.79	0	0		lmo0264	internalin E	inlE	987358	5.39	2.43	0	0
lmo0419	hypothetical protein	lmo0419	987843	-2.54	-1.34	1.57e-07	2.32e-06		lmo0265	succinyl-diaminopimelate desuccinylase	lmo0265	987360	29.95	4.9	0	0
lmo0433	internalin A	inlA	985151	-3.57	-1.83	2.14e-10	5.23e-09		lmo0266	transcriptional regulator	lmo0266	987368	6.13	2.62	0	0
lmo0434	internalin B	inlB	986892	-3.1	-1.63	4e-13	1.33e-11		lmo0267	hypothetical protein	lmo0267	987388	4.12	2.04	3.94e-14	5.38e-13
lmo0436	hypothetical protein	lmo0436	986537	-5	-2.32	0	0		lmo0275	hypothetical protein	lmo0275	987414	-2.08	-1.05	3.92e-06	2.26e-05
lmo0440	lmo0440	lmo0440	985165	-2.19	-1.13	1.78e-05	0.000172		lmo0279	anaerobic ribonucleoside triphosphate reductase	lmo0279	987434	-15.32	-3.94	0	0
lmo0476	oxetanocin A resistance protein OxrB	lmo0476	985213	-2.37	-1.25	7.45e-09	1.39e-07		lmo0280	anaerobic ribonucleotide reductase activator protein	lmo0280	987436	-10.38	-3.38	0	0
lmo0483	lmo0483	lmo0483	985216	-2.01	-1.01	8.81e-05	0.000681		lmo0288	two-component sensor histidine kinase	lmo0288	987449	-2.11	-1.08	7.81e-07	4.98e-06
lmo0484	lmo0484	lmo0484	985220	4.09	2.03	0	0		lmo0291	hypothetical protein	lmo0291	987454	3.65	1.87	0	0
lmo0485	lmo0485	lmo0485	985219	5.25	2.39	0	0		lmo0292	heat-shock protein htrA serine protease	lmo0292	987455	3.06	1.61	1.38e-06	8.48e-06
lmo0486	50S ribosomal protein L32	rpmF_1	985221	4.64	2.21	1.24e-13	4.32e-12		lmo0293	rRNA large subunit methyltransferase	lmo0293	987456	-3.06	-1.61	0.00297	0.00911
lmo0510	lmo0510	lmo0510	985258	-2.3	-1.2	2.21e-05	0.000206		lmo0294	LysR family transcriptional regulator	lmo0294	987457	-8.36	-3.06	0	0
lmo0515	hypothetical protein	lmo0515	986558	-2.63	-1.4	7.25e-09	1.36e-07		lmo0295	FMN-containing NADPH-linked nitro/flavin reductase	lmo0295	987458	-2.38	-1.25	0.000136	0.000563
lmo0519	multidrug resistance protein	lmo0519	985272	3.64	1.86	7.11e-15	2.86e-13		lmo0302	lmo0302	lmo0302	987513	-2.96	-1.57	3.05e-09	2.7e-08
lmo0523	hypothetical protein	lmo0523	985275	2.15	1.11	0.000252	0.00174		lmo0303	putaive secreted, lysin rich protein	lmo0303	987514	-2.92	-1.55	6.14e-05	0.000278
lmo0541	ABC transporter substrate-binding protein	lmo0541	986277	5.44	2.44	0	0		lmo0321	hypothetical protein	lmo0321	987539	14.54	3.86	0	0
lmo0559	hypothetical protein	lmo0559	985234	-3.31	-1.73	1.12e-07	1.72e-06		lmo0322	hypothetical protein	lmo0322	987554	4.96	2.31	1.04e-05	5.55e-05
lmo0573	hypothetical protein	lmo0573	985853	-10.03	-3.33	0	0		lmo0325	transcriptional regulator	lmo0325	987559	5.19	2.38	0	0
lmo0574	beta-glucosidase	lmo0574	984589	2	1	0.00272	0.01		lmo0332	lmo0332	lmo0332	987567	-2.33	-1.22	5.35e-05	0.000244
lmo0576	hypothetical cell wall associated protein	lmo0576	985083	-2.2	-1.14	6.79e-06	7.17e-05		lmo0346	triosephosphate isomerase	lmo0346	987587	2.14	1.09	0.01	0.03
lmo0581	hypothetical protein	lmo0581	984637	2.05	1.04	2.57e-09	5.14e-08		lmo0348	dihydroxyacetone kinase	lmo0348	987591	2.29	1.19	0.02	0.05
lmo0588	DNA photolyase	lmo0588	984699	2.18	1.13	7.95e-07	1.03e-05		lmo0355	fumarate reductase subunit A	lmo0355	987602	-5.79	-2.53	0	0
lmo0593	formate transporter	lmo0593	984793	-2.71	-1.44	5.21e-13	1.71e-11		lmo0356	oxidoreductase	lmo0356	987603	2.24	1.17	2.81e-07	1.94e-06
lmo0597	Crp/Fnr family transcriptional regulator	lmo0597	985531	4.6	2.2	2.96e-14	1.09e-12		lmo0357	PTS sugar transporter subunit IIA	lmo0357	987604	5.26	2.39	0.00445	0.01
lmo0606	MarR family transcriptional regulator	lmo0606	985290	2.2	1.14	0.00037	0.00244		lmo0360a	hypothetical protein	lmo0360a	16695810	-2.81	-1.49	5.7e-06	3.2e-05
lmo0607	ABC transporter ATP-binding protein	lmo0607	985501	2.06	1.04	1.87e-05	0.000178		lmo0361	membrane protein	lmo0361	987609	2.63	1.4	0.000233	0.000914
lmo0609	phage shock protein E	lmo0609	986403	5.98	2.58	1.9e-10	4.71e-09		lmo0362	hypothetical protein	lmo0362	987610	7.79	2.96	0.00182	0.00589
lmo0611	azoreductase	acpD	985209	5.8	2.54	0	0		lmo0368	hypothetical protein	lmo0368	987618	-2.36	-1.24	1.04e-05	5.57e-05
lmo0612	MarR family transcriptional evidence	lmo0612	984912	11.4	3.51	0	0		lmo0389	low temperature requirement protein A	ltrA	987647	2.14	1.1	0.000663	0.00234
lmo0613	oxidoreductase	lmo0613	987413	6.93	2.79	0	0		lmo0394	P60 protein	lmo0394	987653	-10.37	-3.37	0	0
lmo0622	hypothetical protein	lmo0622	985471	2.82	1.5	1.72e-05	0.000167		lmo0395	blasticidin S-acetyltransferase	lmo0395	987654	-2.27	-1.18	0.000983	0.00338
lmo0628	lmo0628	lmo0628	984963	-2.94	-1.55	0.00341	0.02		lmo0400	PTS fructose transporter subunit IIC	lmo0400	987677	5.23	2.39	0.000987	0.00339
lmo0641	heavy metal-transporting ATPase	lmo0641	985323	-6.23	-2.64	0	0		lmo0403	lmo0403	lmo0403	987752	-2.57	-1.36	1.96e-05	9.9e-05
lmo0642	lmo0642	lmo0642	984976	-2.81	-1.49	4.5e-08	7.55e-07		lmo0404	lmo0404	lmo0404	987761	-2.07	-1.05	0.000995	0.00341
lmo0646	hypothetical protein	lmo0646	984982	2.34	1.22	3.8e-06	4.3e-05		lmo0405	phosphate transporter	lmo0405	987767	12.49	3.64	0	0
lmo0651	transcriptional regulator	lmo0651	984985	2.04	1.03	4.72e-07	6.41e-06		lmo0406	hypothetical protein	lmo0406	987775	4.37	2.13	5e-15	7.34e-14
lmo0667	ABC transporter ATP-binding protein	lmo0667	985013	2.02	1.02	3.11e-06	3.56e-05		lmo0412	lmo0412	lmo0412	987812	-10.79	-3.43	0	0
lmo0685	flagellar motor protein MotA	lmo0685	985036	2.02	1.01	1.29e-05	0.000129		lmo0414	hypothetical protein	lmo0414	987822	-2.12	-1.08	3.98e-06	2.29e-05
lmo0686	flagellar motor rotation MotB	motB	986861	2.37	1.24	7.18e-11	1.84e-09		lmo0417	lmo0417	lmo0417	987835	-2.07	-1.05	0.0045	0.01
lmo0687	lmo0687	lmo0687	985029	2.75	1.46	1.16e-13	4.07e-12		lmo0418	lmo0418	lmo0418	987842	-3.08	-1.62	1.41e-10	1.4e-09
lmo0688	hypothetical protein	lmo0688	986281	3.14	1.65	1.01e-09	2.11e-08		lmo0419	hypothetical protein	lmo0419	987843	-3.7	-1.89	1.34e-13	1.73e-12
lmo0689	chemotaxis protein CheV	lmo0689	987162	3.4	1.76	0	0		lmo0422	lineage-specific thermal regulator protein	lstR	987850	-2.34	-1.22	3.36e-05	0.00016
lmo0691	chemotaxis response regulator CheY	cheY	985049	-2.87	-1.52	3.51e-13	1.19e-11		lmo0423	RNA polymerase factor sigma C	lmo0423	987863	-2.3	-1.2	0.000116	0.000486
lmo0692	two-component sensor histidine kinase CheA	cheA	985032	-2.54	-1.34	6.12e-07	8.02e-06		lmo0433	internalin A	inlA	985151	2.25	1.17	5.97e-07	3.87e-06
lmo0693	flagellar motor switch protein FliY	lmo0693	985035	-2.1	-1.07	4.96e-08	8.2e-07		lmo0436	hypothetical protein	lmo0436	986537	-5.51	-2.46	0	0
lmo0694	lmo0694	lmo0694	985033	-2.1	-1.07	1.51e-09	3.08e-08		lmo0439	hypothetical protein	lmo0439	985164	17.69	4.14	0	0
lmo0703	lmo0703	lmo0703	985050	-2.59	-1.37	1.19e-06	1.5e-05		lmo0440	lmo0440	lmo0440	985165	-2.38	-1.25	4.49e-07	2.96e-06
lmo0704	lmo0704	lmo0704	985042	-2.56	-1.36	2.07e-12	6.51e-11		lmo0445	transcripitonal regulator	lmo0445	985175	8.11	3.02	0	0
lmo0723	metyl-accepting chemotaxis protein	lmo0723	986712	-5.08	-2.34	3.2e-12	9.77e-11		lmo0446	penicillin acylase	lmo0446	985176	2.16	1.11	0.01	0.03
lmo0724	hypothetical protein	lmo0724	986702	-3.1	-1.63	2.89e-11	8.1e-10		lmo0447	glutamate decarboxylase	lmo0447	986724	2.43	1.28	0.01	0.03
lmo0728	riboflavin kinase / FAD synthase	lmo0728	986299	2.35	1.23	1.12e-07	1.72e-06		lmo0476	oxetanocin A resistance protein OxrB	lmo0476	985213	-2.18	-1.12	3.6e-07	2.41e-06
lmo0758	lmo0758	lmo0758	985508	4.36	2.12	5.12e-08	8.37e-07		lmo0478	secreted protein	lmo0478	985211	-3.3	-1.72	5.88e-15	8.6e-14
lmo0770	LacI family transcriptional regulator	lmo0770	985481	3.43	1.78	1.11e-16	5.22e-15		lmo0479	secreted protein	lmo0479	985210	-2.14	-1.1	2.69e-06	1.59e-05
lmo0773	alcohol dehydrogenase	lmo0773	985473	2.11	1.08	9.56e-05	0.00073		lmo0480	transcriptional regulator	lmo0480	985214	-2.21	-1.14	2.4e-06	1.42e-05
lmo0776	transcriptional regulator	lmo0776	985467	3.63	1.86	3.46e-05	0.000303		lmo0482	ribosomal RNA large subunit methyltransferase N	lmo0482	986229	-3.3	-1.72	3.39e-09	2.96e-08
lmo0781	PTS mannose transporter subunit IID	lmo0781	985460	-3.04	-1.6	2.09e-12	6.51e-11		lmo0483	lmo0483	lmo0483	985216	-3.08	-1.62	1.67e-10	1.64e-09
lmo0782	PTS mannose transporter subunit IIC	lmo0782	985459	-3.29	-1.72	3.76e-11	1.03e-09		lmo0484	lmo0484	lmo0484	985220	4.87	2.28	1.23e-12	1.46e-11
lmo0783	PTS mannose transporter subunit IIB	lmo0783	985458	-3.07	-1.62	4.33e-11	1.15e-09		lmo0485	lmo0485	lmo0485	985219	4.62	2.21	1.8e-12	2.09e-11
lmo0784	PTS mannose transporter subunit IIB	lmo0784	985456	-3.1	-1.63	2e-09	4.02e-08		lmo0486	50S ribosomal protein L32	rpmF_1	985221	3.29	1.72	1.19e-10	1.19e-09
lmo0788	lmo0788	lmo0788	985448	-2.3	-1.2	1.17e-05	0.000118		lmo0492	LysR family transcriptional regulator	lmo0492	985232	-2.77	-1.47	9.33e-08	6.8e-07
lmo0798	lysine-specific permease	lmo0798	985421	5.3	2.41	0	0		lmo0497	sugar transferase	lmo0497	984596	-3.2	-1.68	0	0
lmo0799	lmo0799	lmo0799	985420	4.3	2.1	0	0		lmo0505	ribulose-5-phosphate 3-epimerase	lmo0505	985251	2.43	1.28	0.01	0.03
lmo0800	hypothetical protein	lmo0800	985418	2.02	1.01	0.0026	0.01		lmo0506	sorbitol dehydrogenase	lmo0506	986275	2.05	1.04	0.000349	0.00133
lmo0801	internalin	lmo0801	985415	2.37	1.24	9.85e-07	1.27e-05		lmo0510	lmo0510	lmo0510	985258	-3.1	-1.63	9.44e-11	9.49e-10
lmo0806	transcriptional regulator	lmo0806	985404	-6.76	-2.76	0	0		lmo0511	hypothetical protein	lmo0511	985259	-2.03	-1.02	2.52e-06	1.49e-05
lmo0807	spermidine/putrescine ABC transporter ATP-binding protein	lmo0807	985403	-3.83	-1.94	3.77e-15	1.58e-13		lmo0514	internalin	lmo0514	985260	-2.22	-1.15	0.000162	0.000657
lmo0808	spermidine/putrescine ABC transporter permease	lmo0808	985401	-2.77	-1.47	2.28e-08	3.96e-07		lmo0515	hypothetical protein	lmo0515	986558	5.34	2.42	0	0
lmo0814	oxidoreductase	lmo0814	985391	-4.49	-2.17	8.22e-15	3.26e-13		lmo0516	encapsulation protein CapA	lmo0516	985267	-2.36	-1.24	8.74e-08	6.42e-07
lmo0815	transcriptional regulator	lmo0815	985389	-2.22	-1.15	0.000158	0.00115		lmo0519	multidrug resistance protein	lmo0519	985272	2.77	1.47	1.11e-16	1.79e-15
lmo0816	regulatory protein PaiA	lmo0816	985388	-2.15	-1.11	6.1e-05	0.000492		lmo0524	sulfate transporter	lmo0524	985278	3.46	1.79	0	0
lmo0818	cation-transporting ATPase	lmo0818	985383	-5.76	-2.53	0	0		lmo0531	lmo0531	lmo0531	985297	2.19	1.13	4.91e-05	0.000225
lmo0819	lmo0819	lmo0819	985382	-4.49	-2.17	0	0		lmo0539	tagatose 1,6-diphosphate aldolase	lmo0539	985316	21.4	4.42	0	0
lmo0823	oxidoreductase	lmo0823	985374	5.66	2.5	5.99e-11	1.55e-09		lmo0541	ABC transporter substrate-binding protein	lmo0541	986277	9.06	3.18	1.52e-13	1.95e-12
lmo0847	glutamine ABC transporter	lmo0847	985328	-3.71	-1.89	7.77e-16	3.44e-14		lmo0551	lmo0551	lmo0551	984417	2.51	1.33	7.51e-06	4.13e-05
lmo0848	amino acid ABC transporter ATP-binding protein	lmo0848	985325	-2.17	-1.12	2.53e-07	3.66e-06		lmo0554	NADH-dependent butanol dehydrogenase	lmo0554	984446	10.15	3.34	0	0
lmo0868	lmo0868	lmo0868	984573	-3.11	-1.64	6.73e-06	7.14e-05		lmo0555	di-tripeptide transporter	lmo0555	984577	5.64	2.5	0	0
lmo0897	transporter	lmo0897	984941	-3.04	-1.6	5.25e-09	1.03e-07		lmo0559	hypothetical protein	lmo0559	985234	-4.51	-2.17	9.77e-13	1.17e-11
lmo0905	lmo0905	lmo0905	986916	2.46	1.3	2.93e-07	4.21e-06		lmo0573	hypothetical protein	lmo0573	985853	-16.91	-4.08	0	0
lmo0906	glutathione reductase	lmo0906	986897	2.19	1.13	5.1e-08	8.37e-07		lmo0576	hypothetical cell wall associated protein	lmo0576	985083	-2.76	-1.47	1.49e-08	1.21e-07
lmo0908	hypothetical protein	lmo0908	986924	-2.22	-1.15	1.31e-08	2.34e-07		lmo0579	hypothetical protein	lmo0579	986865	3.01	1.59	1.35e-12	1.59e-11
lmo0909	GntR family transcriptional regulator	lmo0909	986502	4.12	2.04	4.06e-14	1.46e-12		lmo0580	hypothetical protein	lmo0580	986638	3.38	1.76	1e-13	1.31e-12
lmo0910	lmo0910	lmo0910	984497	2.56	1.36	4.68e-10	1.06e-08		lmo0584	hypothetical protein	lmo0584	984661	5.22	2.39	0	0
lmo0912	formate transporter	lmo0912	986984	-8.55	-3.1	0	0		lmo0588	DNA photolyase	lmo0588	984699	2.63	1.39	1.34e-12	1.58e-11
lmo0923	ABC transporter ATP-binding protein	lmo0923	986349	3.22	1.69	1.52e-07	2.26e-06		lmo0589	lmo0589	lmo0589	985047	19.36	4.28	3.32e-14	4.57e-13
lmo0924	pseudo	lmo0924	985961	2.57	1.36	1.35e-05	0.000134		lmo0590	hypothetical protein	lmo0590	985311	10.4	3.38	8.88e-16	1.38e-14
lmo0925	hypothetical protein	lmo0925	986858	2.54	1.34	8.82e-07	1.14e-05		lmo0591	hypothetical protein	lmo0591	984755	8.89	3.15	3.87e-13	4.79e-12
lmo0929	sortase	lmo0929	986837	-3.51	-1.81	0	0		lmo0593	formate transporter	lmo0593	984793	-3.6	-1.85	0	0
lmo0944	hypothetical protein	lmo0944	986825	2.26	1.18	8.62e-06	8.87e-05		lmo0596	hypothetical protein	lmo0596	985266	21.51	4.43	0	0
lmo0956	N-acetylglucosamine-6P-phosphate deacetylase	lmo0956	986776	2.67	1.42	1.31e-11	3.82e-10		lmo0597	Crp/Fnr family transcriptional regulator	lmo0597	985531	4.7	2.23	3.33e-16	5.24e-15
lmo0959	undacaprenyl-phosphate N-acetylglucosaminyltransferase	lmo0959	986475	-3.1	-1.63	1.49e-14	5.83e-13		lmo0602	transcripitonal regulator	lmo0602	984599	11.04	3.47	0	0
lmo0960	protease	lmo0960	986469	-4.44	-2.15	0	0		lmo0606	MarR family transcriptional regulator	lmo0606	985290	2.49	1.32	9.38e-09	7.78e-08
lmo0961	protease	lmo0961	986465	-4.03	-2.01	1.62e-14	6.27e-13		lmo0607	ABC transporter ATP-binding protein	lmo0607	985501	3.26	1.71	1.11e-16	1.79e-15
lmo0982	peptidase	lmo0982	986804	2.14	1.1	0.000521	0.00322		lmo0608	ABC transporter ATP-binding protein	lmo0608	984780	2.48	1.31	1.22e-06	7.55e-06
lmo0994	lmo0994	lmo0994	986414	-2.39	-1.26	4.75e-07	6.42e-06		lmo0609	phage shock protein E	lmo0609	986403	4.12	2.04	1.92e-08	1.53e-07
lmo1007	lmo1007	lmo1007	986404	4.22	2.08	3.57e-11	9.82e-10		lmo0610	internalin	lmo0610	985509	46.37	5.54	0	0
lmo1024	lmo1024	lmo1024	986351	-2.89	-1.53	6.6e-09	1.26e-07		lmo0611	azoreductase	acpD	985209	9.27	3.21	0	0
lmo1025	lmo1025	lmo1025	986700	-2.5	-1.32	2.73e-07	3.93e-06		lmo0612	MarR family transcriptional evidence	lmo0612	984912	10.39	3.38	8.88e-16	1.38e-14
lmo1050	hypothetical protein	lmo1050	986511	-2.89	-1.53	1.78e-09	3.6e-08		lmo0613	oxidoreductase	lmo0613	987413	7.72	2.95	0	0
lmo1052	pyruvate dehydrogenase subunit E1 alpha	pdhA	986808	7.67	2.94	2.84e-14	1.06e-12		lmo0614	hypothetical protein	lmo0614	985507	-2.37	-1.24	1.8e-08	1.45e-07
lmo1053	pyruvate dehydrogenase subunit E1 beta	PdhB	984409	6.56	2.71	3.94e-13	1.32e-11		lmo0622	hypothetical protein	lmo0622	985471	3.36	1.75	3.16e-08	2.45e-07
lmo1054	dihydrolipoamide acetyltransferase	pdhC	986301	6.37	2.67	8.33e-11	2.12e-09		lmo0623	lmo0623	lmo0623	984945	2.57	1.36	2.24e-08	1.77e-07
lmo1055	dihydrolipoamide dehydrogenase	PdhD	986542	4.73	2.24	5.24e-08	8.52e-07		lmo0628	lmo0628	lmo0628	984963	46.31	5.53	0	0
lmo1060	transcriptional regulator	lmo1060	984788	-2.32	-1.21	0.000598	0.00361		lmo0630	transcriptional antiterminator BglG	lmo0630	984967	2.28	1.19	0.01	0.03
lmo1070	hypothetical protein	lmo1070	986295	-2.05	-1.04	3.9e-07	5.38e-06		lmo0641	heavy metal-transporting ATPase	lmo0641	985323	-7.15	-2.84	0	0
lmo1120	lmo1120	lmo1120	986206	-3.04	-1.6	6.08e-05	0.000491		lmo0646	hypothetical protein	lmo0646	984982	2.44	1.29	1.46e-08	1.19e-07
lmo1122	lmo1122	lmo1122	986203	-2.66	-1.41	0.00856	0.03		lmo0647	lmo0647	lmo0647	985414	3.44	1.78	1.17e-07	8.41e-07
lmo1126	hypothetical protein	lmo1126	986193	-2.68	-1.42	0.00152	0.00782		lmo0648	hypothetical protein	lmo0648	987051	4.07	2.03	0	0
lmo1128	lmo1128	lmo1128	985150	-2.2	-1.14	0.0019	0.0095		lmo0649	transcriptional regulator	lmo0649	986557	3.37	1.75	6.11e-15	8.8e-14
lmo1129	hypothetical protein	lmo1129	986195	-2.67	-1.42	0.00199	0.00988		lmo0650	hypothetical protein	lmo0650	984986	3.79	1.92	0	0
lmo1130	transcriptional regulator	lmo1130	985135	-2.77	-1.47	0.00534	0.02		lmo0651	transcriptional regulator	lmo0651	984985	2.03	1.02	1.72e-08	1.39e-07
lmo1140	lmo1140	lmo1140	986180	-2.16	-1.11	0.00134	0.00704		lmo0654	lmo0654	lmo0654	984989	6.35	2.67	0	0
lmo1170	PduX protein	lmo1170	986128	-2.16	-1.11	2.85e-05	0.000256		lmo0655	phosphoprotein phosphatase	lmo0655	984992	7.8	2.96	0	0
lmo1172	two-component response regulator	lmo1172	986126	-4.6	-2.2	2.22e-16	1.01e-14		lmo0659	transcriptional regulator	lmo0659	984988	-3.44	-1.78	6.5e-05	0.000292
lmo1173	two-component sensor histidine kinase	lmo1173	986122	-3.81	-1.93	3e-10	7.11e-09		lmo0669	oxidoreductase	lmo0669	987147	40.34	5.33	0	0
lmo1174	ethanolamine utilization protein EutA	eutA	986123	-3.57	-1.84	6.81e-07	8.89e-06		lmo0670	lmo0670	lmo0670	985009	30.69	4.94	0	0
lmo1227	uracil-DNA glycosylase	lmo1227	986857	-4.66	-2.22	8.66e-13	2.81e-11		lmo0673	lmo0673	lmo0673	987146	-2.1	-1.07	2.72e-05	0.000133
lmo1233	thioredoxin	trxA	986032	2.9	1.54	0.000372	0.00244		lmo0674	lmo0674	lmo0674	985015	-2.51	-1.33	2.15e-11	2.25e-10
lmo1243	lmo1243	lmo1243	986018	-2.2	-1.14	8.11e-09	1.5e-07		lmo0675	lmo0675	fliN	987142	-6.43	-2.68	0	0
lmo1254	alpha,alpha-phosphotrehalase	lmo1254	986004	2.25	1.17	3.04e-10	7.15e-09		lmo0676	flagellar biosynthesis protein FliP	fliP	985021	-6.72	-2.75	0	0
lmo1255	PTS trehalose transporter subunit IIBC	lmo1255	986002	2.3	1.2	4.53e-08	7.57e-07		lmo0677	flagellar biosynthesis protein FliQ	fliQ	985022	-5.33	-2.41	9.99e-16	1.54e-14
lmo1257	lmo1257	lmo1257	985997	-3.59	-1.85	1.26e-05	0.000126		lmo0678	flagellar biosynthesis protein FliR	fliR	985024	-4.09	-2.03	0	0
lmo1298	glutamine synthetase repressor	glnR	985126	-4.01	-2	3.89e-15	1.6e-13		lmo0679	flagellar biosynthesis protein FlhB	flhB	986322	-3.38	-1.76	6.18e-13	7.49e-12
lmo1299	glutamine synthetase	glnA	985115	-3	-1.58	1.62e-05	0.000159		lmo0680	flagellar biosynthesis protein FlhA	flhA	986323	-2.1	-1.07	2.27e-06	1.35e-05
lmo1300	arsenic transporter	lmo1300	985130	2.64	1.4	4.69e-06	5.17e-05		lmo0689	chemotaxis protein CheV	lmo0689	987162	2.2	1.14	5.81e-07	3.77e-06
lmo1330	30S ribosomal protein S15	rpsO	987711	2.14	1.1	0.00236	0.01		lmo0691	chemotaxis response regulator CheY	cheY	985049	-2.98	-1.57	3.94e-13	4.85e-12
lmo1364	cold-shock protein	cspL (cspA)	987871	3.1	1.63	0.00012	0.000886		lmo0692	two-component sensor histidine kinase CheA	cheA	985032	-2.52	-1.33	2.41e-12	2.77e-11
lmo1377	two-component response regulator	lisR	987849	-2.25	-1.17	2.79e-09	5.54e-08		lmo0694	lmo0694	lmo0694	985033	-2.13	-1.09	3.68e-06	2.14e-05
lmo1378	two-component sensor histidine kinase	lisK	987844	-2.12	-1.08	7.21e-08	1.15e-06		lmo0703	lmo0703	lmo0703	985050	-3.08	-1.62	6.01e-08	4.5e-07
lmo1387	pyrroline-5-carboxylate reductase	lmo1387	987829	3.47	1.8	0	0		lmo0704	lmo0704	lmo0704	985042	-2.41	-1.27	7.26e-10	6.89e-09
lmo1406	pyruvate formate-lyase	pflB	986171	-3.09	-1.63	1.93e-05	0.000183		lmo0722	pyruvate oxidase	lmo0722	986726	38.37	5.26	0	0
lmo1407	pyruvate-formate lyase activating enzyme	pflC	986485	-2.72	-1.45	1.6e-13	5.5e-12		lmo0723	metyl-accepting chemotaxis protein	lmo0723	986712	2.14	1.1	3.57e-07	2.4e-06
lmo1408	hypothetical protein	lmo1408	986462	-2.12	-1.08	3.5e-05	0.000306		lmo0727	glucosamine--fructose-6-phosphate aminotransferase	lmo0727	986353	-2.05	-1.04	2.03e-05	0.000102
lmo1410	lmo1410	lmo1410	986496	-2.05	-1.03	0.000225	0.00158		lmo0728	riboflavin kinase / FAD synthase	lmo0728	986299	3.25	1.7	4.88e-14	6.6e-13
lmo1415	hydroxy-3-methylglutaryl-CoA synthase	lmo1415	986439	2.13	1.09	0.000615	0.00367		lmo0753	Crp/Fnr family transcriptional regulator	lmo0753	985518	-2.93	-1.55	2.75e-09	2.45e-08
lmo1423	lmo1423	lmo1423	986759	2.47	1.3	0.00102	0.00559		lmo0754	hypothetical protein	lmo0754	985517	-2.07	-1.05	4.7e-05	0.000216
lmo1424	manganese transporter	lmo1424	986818	9.11	3.19	4e-15	1.63e-13		lmo0758	lmo0758	lmo0758	985508	11.43	3.51	0	0
lmo1439	superoxide dismutase	sod	986791	3.02	1.59	1.81e-05	0.000173		lmo0759	lmo0759	lmo0759	985503	15.1	3.92	0	0
lmo1477	oxidoreductase	lmo1477	986668	2.3	1.2	2.43e-06	2.87e-05		lmo0760	lmo0760	lmo0760	985499	11.45	3.52	0	0
lmo1497	uridine kinase	udk	986986	-2.33	-1.22	4.63e-05	0.000385		lmo0761	hypothetical protein	lmo0761	985498	11.26	3.49	0	0
lmo1498	O-methyltransferase	lmo1498	986934	-3.4	-1.77	4.39e-12	1.31e-10		lmo0765	lmo0765	lmo0765	985489	2.99	1.58	0.00127	0.00426
lmo1500	hypothetical protein	lmo1500	986971	-3.01	-1.59	1.18e-11	3.48e-10		lmo0770	LacI family transcriptional regulator	lmo0770	985481	2.75	1.46	1.69e-11	1.79e-10
lmo1528	hypothetical protein	lmo1528	987797	-2.13	-1.09	4.73e-08	7.85e-07		lmo0771	lmo0771	lmo0771	985478	-2.14	-1.1	3.72e-08	2.83e-07
lmo1529	hypothetical protein	lmo1529	987799	2.22	1.15	0.000273	0.00186		lmo0777	lmo0777	lmo0777	985466	-3.18	-1.67	0	0
lmo1539	glycerol transporter	lmo1539	987817	2.43	1.28	7.78e-10	1.69e-08		lmo0778	lmo0778	lmo0778	985465	-4.86	-2.28	0	0
lmo1559	threonyl-tRNA synthetase	thrS	986974	2.44	1.29	0.000905	0.00505		lmo0780	lmo0780	lmo0780	985461	-3.84	-1.94	2.31e-07	1.61e-06
lmo1566	isocitrate dehydrogenase	citC	986955	-2.05	-1.03	1.51e-07	2.26e-06		lmo0781	PTS mannose transporter subunit IID	lmo0781	985460	7.34	2.88	0	0
lmo1573	acetyl-CoA carboxylase subunit beta	accD	986998	-2.29	-1.19	1.06e-08	1.93e-07		lmo0782	PTS mannose transporter subunit IIC	lmo0782	985459	13.46	3.75	0	0
lmo1583	thiol peroxidase	tpx	987763	2.96	1.57	9.08e-05	0.000698		lmo0783	PTS mannose transporter subunit IIB	lmo0783	985458	21.01	4.39	0	0
lmo1595	hypothetical protein	lmo1595	986055	2.44	1.29	1.29e-06	1.62e-05		lmo0784	PTS mannose transporter subunit IIB	lmo0784	985456	26.41	4.72	0	0
lmo1600	bifunctional 3-deoxy-7-phosphoheptulonate synthase/chorismate mutase	aroA	985307	2.08	1.06	0.000393	0.00255		lmo0788	lmo0788	lmo0788	985448	-2.2	-1.14	3.56e-05	0.000168
lmo1613	hypothetical protein	lmo1613	985723	-2.05	-1.04	0.01	0.04		lmo0794	hypothetical protein	lmo0794	985430	16.29	4.03	0	0
lmo1617	multidrug transporter	lmo1617	985727	17.14	4.1	0	0		lmo0796	hypothetical protein	lmo0796	985428	30.14	4.91	0	0
lmo1618	MarR family transcriptional regulator	lmo1618	985724	31.5	4.98	0	0		lmo0798	lysine-specific permease	lmo0798	985421	6.59	2.72	0	0
lmo1621	hypothetical protein	lmo1621	985720	-2.79	-1.48	7.12e-10	1.55e-08		lmo0799	lmo0799	lmo0799	985420	5.59	2.48	0	0
lmo1622	hypothetical protein	lmo1622	985726	-2.5	-1.32	1.46e-09	2.99e-08		lmo0804	lmo0804	lmo0804	985406	-2.88	-1.53	3.61e-09	3.14e-08
lmo1631	anthranilate phosphoribosyltransferase	trpD	985706	2.68	1.42	0.000684	0.00401		lmo0805	lmo0805	lmo0805	985405	-2.47	-1.3	2.72e-05	0.000133
lmo1634	bifunctional acetaldehyde-CoA/alcohol dehydrogenase	lmo1634	985703	-4.69	-2.23	4.34e-09	8.55e-08		lmo0806	transcriptional regulator	lmo0806	985404	-11.28	-3.5	0	0
lmo1650	hypothetical protein	lmo1650	985591	2.49	1.32	2.13e-08	3.73e-07		lmo0807	spermidine/putrescine ABC transporter ATP-binding protein	lmo0807	985403	-6.42	-2.68	0	0
lmo1670	hypothetical protein	lmo1670	985658	2.49	1.31	6.92e-05	0.000555		lmo0808	spermidine/putrescine ABC transporter permease	lmo0808	985401	-4.65	-2.22	0	0
lmo1671	ABC transporter	lmo1671	985656	-2.47	-1.3	8.86e-06	9.05e-05		lmo0809	spermidine/putrescine ABC transporter permease	lmo0809	985399	-2.79	-1.48	4.73e-09	4.07e-08
lmo1678	bifunctional homocysteine S-methyltransferase/5,10-methylenetetrahydrofolate reductase	lmo1678	985643	2.2	1.13	0.01	0.05		lmo0810	spermidine/putrescine ABC transporter substrate-binding protein	lmo0810	985395	-2.39	-1.26	1.13e-06	7.03e-06
lmo1684	glycerate dehydrogenase	lmo1684	985633	2.37	1.25	1.74e-12	5.52e-11		lmo0811	carbonic anhydrase	lmo0811	985394	2.27	1.18	4.41e-07	2.91e-06
lmo1697	hypothetical protein	lmo1697	985615	-2.28	-1.19	3.25e-07	4.59e-06		lmo0813	fructokinase	lmo0813	985392	2.11	1.08	0.000133	0.000549
lmo1713	rod shape-determining protein MreB	lmo1713	985588	2.33	1.22	4e-10	9.2e-09		lmo0814	oxidoreductase	lmo0814	985391	-10.2	-3.35	0	0
lmo1738	amino acid ABC transporter substrate-binding protein	lmo1738	985565	7.94	2.99	1.38e-07	2.08e-06		lmo0815	transcriptional regulator	lmo0815	985389	-4.24	-2.08	3.62e-13	4.5e-12
lmo1739	amino acid ABC transporter ATP-binding protein	lmo1739	985571	8.66	3.11	8.81e-08	1.39e-06		lmo0816	regulatory protein PaiA	lmo0816	985388	-3.98	-1.99	3.79e-12	4.26e-11
lmo1740	amino acid ABC transporter permease	lmo1740	985563	7.98	3	2.49e-07	3.62e-06		lmo0823	oxidoreductase	lmo0823	985374	7.85	2.97	4.29e-09	3.7e-08
lmo1750	hypothetical protein	lmo1750	985557	-3.34	-1.74	0	0		lmo0829	pyruvate-flavodoxin oxidoreductase	nifJ	985364	-2.09	-1.06	5.28e-09	4.49e-08
lmo1806	acyl carrier protein	acpP	986035	2.83	1.5	0.000123	0.000911		lmo0834	lmo0834	lmo0834	985353	-2.49	-1.32	1.54e-05	7.94e-05
lmo1815	hypothetical protein	lmo1815	985911	-2.13	-1.09	6.61e-09	1.26e-07		lmo0836	phosphate-starvation-inducible protein PsiE	lmo0836	985351	-2.03	-1.02	0.000304	0.00117
lmo1831	orotate phosphoribosyltransferase	pyrE	985882	-4.19	-2.07	3.9e-11	1.05e-09		lmo0840	lmo0840	lmo0840	985341	-2.28	-1.19	2.7e-05	0.000133
lmo1832	orotidine 5'-phosphate decarboxylase	pyrF	985880	-4.27	-2.1	1.78e-14	6.78e-13		lmo0842	peptidoglycan binding protein	lmo0842	985337	-2.18	-1.13	1.13e-10	1.13e-09
lmo1833	dihydroorotate dehydrogenase	pyrD	985875	-4.12	-2.04	2.35e-12	7.24e-11		lmo0847	glutamine ABC transporter	lmo0847	985328	-6.67	-2.74	0	0
lmo1834	dihydroorotate dehydrogenase electron transfer subunit	pyrDII	985877	-4.52	-2.18	0	0		lmo0848	amino acid ABC transporter ATP-binding protein	lmo0848	985325	-4.02	-2.01	2.63e-11	2.73e-10
lmo1835	carbamoyl-phosphate synthetase	carB	985876	-5.08	-2.34	0	0		lmo0863	lmo0863	lmo0863	984720	2.63	1.39	0.02	0.04
lmo1836	carbamoyl phosphate synthase small subunit	pyrAa	985872	-5.16	-2.37	0	0		lmo0864	lmo0864	lmo0864	984716	2.81	1.49	0.00857	0.02
lmo1837	dihydroorotase	pyrC	985870	-5.59	-2.48	0	0		lmo0868	lmo0868	lmo0868	984573	-6.26	-2.65	0	0
lmo1838	aspartate carbamoyltransferase	pyrB	985866	-7.07	-2.82	0	0		lmo0880	wall associated protein precursor	lmo0880	986636	89.11	6.48	0	0
lmo1839	uracil permease	pyrP	985867	-6.88	-2.78	0	0		lmo0882	hypothetical protein	lmo0882	986548	-2.19	-1.13	8e-05	0.000351
lmo1840	bifunctional pyrimidine regulatory protein PyrR uracil phosphoribosyltransferase	pyrR	985861	-4.19	-2.07	0	0		lmo0893	anti-anti-sigma factor (antagonist of RsbW)	rsbV	986526	4.81	2.27	0	0
lmo1842	hypothetical protein	lmo1842	985864	-2.41	-1.27	3.85e-05	0.000332		lmo0894	serine-protein kinase RsbW	rsbW	986524	4.07	2.02	0	0
lmo1846	multidrug transporter	lmo1846	985857	-3.87	-1.95	2.35e-11	6.71e-10		lmo0895	RNA polymerase sigma factor SigB	sigB	986527	4.49	2.17	0	0
lmo1847	metal ABC transporter	lmo1847	985848	19.59	4.29	0	0		lmo0896	indirect negative regulation of sigma B dependant gene expression (serine phosphatase)	rsbX	986520	4.07	2.03	0	0
lmo1848	metal ABC transporter permease	lmo1848	985850	26.98	4.75	0	0		lmo0897	transporter	lmo0897	984941	-4.19	-2.07	2.51e-14	3.48e-13
lmo1849	metal ABC transporter ATP-binding protein	lmo1849	985851	28.52	4.83	0	0		lmo0903	hypothetical protein	lmo0903	986912	2.28	1.19	7.41e-06	4.08e-05
lmo1865	hypothetical protein	lmo1865	985828	2.13	1.09	1.4e-06	1.74e-05		lmo0904	lmo0904	lmo0904	986917	2.15	1.1	6.82e-05	0.000304
lmo1867	pyruvate phosphate dikinase	lmo1867	985826	2.49	1.31	6.72e-09	1.28e-07		lmo0905	lmo0905	lmo0905	986916	3.33	1.74	4.22e-15	6.26e-14
lmo1868	hypothetical protein	lmo1868	986136	-2.05	-1.04	5.7e-05	0.000466		lmo0906	glutathione reductase	lmo0906	986897	2.8	1.49	2.63e-12	3e-11
lmo1869	hypothetical protein	lmo1869	985825	-2.03	-1.02	0.000399	0.00258		lmo0907	phosphoglycerate mutase	lmo0907	986931	2.09	1.06	1.7e-07	1.2e-06
lmo1870	alkaline phosphatase	lmo1870	985824	-5.57	-2.48	0	0		lmo0909	GntR family transcriptional regulator	lmo0909	986502	3.77	1.91	1.1e-11	1.18e-10
lmo1882	30S ribosomal protein S14	rpsN_1	985810	3.6	1.85	8.29e-09	1.53e-07		lmo0910	lmo0910	lmo0910	984497	2.7	1.43	6.15e-12	6.74e-11
lmo1884	xanthine permease	lmo1884	985809	-6.35	-2.67	0	0		lmo0911	lmo0911	lmo0911	986500	8.14	3.03	0	0
lmo1885	xanthine phosphoribosyltransferase	lmo1885	985807	-9.36	-3.23	0	0		lmo0912	formate transporter	lmo0912	986984	-5.51	-2.46	0	0
lmo1898	hypothetical protein	lmo1898	985789	-2.1	-1.07	6.92e-10	1.53e-08		lmo0913	succinate semialdehyde dehydrogenase	lmo0913	986938	124.61	6.96	0	0
lmo1909	hypothetical protein	lmo1909	985776	-2.19	-1.13	8.62e-06	8.87e-05		lmo0914	PTS sugar transporter subunit IIB	lmo0914	987760	19.5	4.29	3.01e-05	0.000146
lmo1910	oxidoreductase	lmo1910	985775	2.76	1.47	2.94e-10	7.03e-09		lmo0915	PTS sugar transporter subunit IIC	lmo0915	987872	10.36	3.37	1.58e-14	2.21e-13
lmo1911	histidine kinase	lmo1911	985774	-2.14	-1.1	2.71e-06	3.15e-05		lmo0916	PTS sugar transporter subunit IIA	lmo0916	987774	8.65	3.11	2.34e-06	1.39e-05
lmo1952	diaminopimelate decarboxylase	lysA_1	987983	-2.93	-1.55	1.75e-06	2.15e-05		lmo0917	beta-glucosidase	lmo0917	987667	3.96	1.98	5.75e-11	5.89e-10
lmo1957	ferrichrome ABC transporter permease	fhuG	987994	2.3	1.2	9.1e-06	9.27e-05		lmo0920	hypothetical protein	lmo0920	986844	-3.62	-1.85	0	0
lmo1960	ferrichrome ABC transporter ATP-binding protein	fhuC	984884	2.91	1.54	4.1e-07	5.62e-06		lmo0921	hypothetical protein	lmo0921	986853	-3.31	-1.73	2.44e-13	3.09e-12
lmo1961	oxidoreductase	lmo1961	984397	2.63	1.4	8.26e-10	1.78e-08		lmo0922	pantothenate kinase	lmo0922	986345	-2.4	-1.26	6.03e-09	5.06e-08
lmo1962	TetR family transcriptional regulator	lmo1962	987974	-3.39	-1.76	5.34e-11	1.39e-09		lmo0923	ABC transporter ATP-binding protein	lmo0923	986349	2.55	1.35	6.73e-06	3.74e-05
lmo1981	hypothetical protein	lmo1981	987963	-2	-1	2.94e-05	0.000262		lmo0924	pseudo	lmo0924	985961	2.44	1.29	4.2e-07	2.79e-06
lmo1982	hypothetical protein	lmo1982	984865	-2.24	-1.16	6.27e-06	6.7e-05		lmo0925	hypothetical protein	lmo0925	986858	2.45	1.29	1.44e-08	1.18e-07
lmo1986	ketol-acid reductoisomerase	ilvC	986504	2.23	1.16	5.52e-05	0.000454		lmo0929	sortase	lmo0929	986837	-2.54	-1.34	2.78e-12	3.15e-11
lmo1989	isopropylmalate isomerase large subunit	leuC	985310	2.01	1.01	0.000392	0.00255		lmo0937	lmo0937	lmo0937	987860	6.05	2.6	0	0
lmo1990	isopropylmalate isomerase small subunit	leuD	984859	2.21	1.15	0.000501	0.00314		lmo0940	lmo0940	lmo0940	987854	-2.16	-1.11	3.4e-07	2.3e-06
lmo1991	threonine dehydratase	ilvA	987960	2.28	1.19	3.22e-05	0.000285		lmo0941	lmo0941	lmo0941	986402	-2.71	-1.44	2.57e-10	2.49e-09
lmo1992	alpha-acetolactate decarboxylase	lmo1992	986230	3.76	1.91	5.2e-07	6.96e-06		lmo0942	heat shock protein 90	lmo0942	986476	-3.1	-1.63	3.71e-10	3.56e-09
lmo2005	oxidoreductase	lmo2005	987954	2.76	1.47	9.69e-05	0.000739		lmo0944	hypothetical protein	lmo0944	986825	2.42	1.27	7.62e-07	4.87e-06
lmo2006	acetolactate synthase	alsS	987957	8.95	3.16	1.84e-14	6.95e-13		lmo0947	hypothetical transport protein	lmo0947	986474	-2.05	-1.04	0.00014	0.000575
lmo2028	hypothetical protein	lmo2028	987967	2.45	1.29	1.56e-11	4.5e-10		lmo0948	transcriptional regulator	lmo0948	986781	-2.5	-1.32	2.86e-06	1.68e-05
lmo2050	excinuclease ABC subunit A	lmo2050	987929	-3.39	-1.76	1.43e-08	2.55e-07		lmo0952	lmo0952	lmo0952	986763	-2.54	-1.34	3.14e-13	3.93e-12
lmo2057	protoheme IX farnesyltransferase	ctaB	984806	3.65	1.87	0	0		lmo0953	lmo0953	lmo0953	986396	11.18	3.48	0	0
lmo2060	hypothetical protein	lmo2060	984801	2.87	1.52	9e-10	1.92e-08		lmo0956	N-acetylglucosamine-6P-phosphate deacetylase	lmo0956	986776	5.29	2.4	0	0
lmo2061	hypothetical protein	lmo2061	987917	3.13	1.65	0	0		lmo0959	undacaprenyl-phosphate N-acetylglucosaminyltransferase	lmo0959	986475	-4.72	-2.24	0	0
lmo2062	copper transporter	lmo2062	987920	3.92	1.97	1.11e-16	5.22e-15		lmo0960	protease	lmo0960	986469	-6.49	-2.7	0	0
lmo2067	bile acid hydrolase	bsh	984795	-4.89	-2.29	0	0		lmo0961	protease	lmo0961	986465	-5.51	-2.46	0	0
lmo2072	redox-sensing transcriptional repressor Rex	lmo2072	984371	2.53	1.34	0.000458	0.0029		lmo0971	DltD protein for D-alanine esterification of lipoteichoic acid and wall teichoic acid	dltD	986447	-2.67	-1.41	0.0002	0.000797
lmo2083	lmo2083	lmo2083	984857	-3.23	-1.69	2.21e-10	5.36e-09		lmo0972	D-alanine--poly(phosphoribitol) ligase subunit 2	dltC	986460	-2.76	-1.46	3.8e-08	2.88e-07
lmo2084	lmo2084	lmo2084	984631	-3.43	-1.78	1.06e-05	0.000107		lmo0973	DltB protein for D-alanine esterification of lipoteichoic acid and wall teichoic acid	dltB	986448	-2.03	-1.02	2.56e-06	1.51e-05
lmo2085	peptidoglycan binding protein	lmo2085	984772	-3.04	-1.61	5.44e-10	1.21e-08		lmo0975	ribose-5-phosphate isomerase A	lmo0975	986443	2.89	1.53	1.27e-08	1.05e-07
lmo2090	argininosuccinate synthase	argG	984368	3.91	1.97	2.5e-10	6.02e-09		lmo0979	daunorubicin resistance ATP-binding protein	lmo0979	986435	2.02	1.02	0.000105	0.000444
lmo2091	argininosuccinate lyase	argH	987914	2.76	1.47	2.62e-11	7.41e-10		lmo0982	peptidase	lmo0982	986804	2.75	1.46	1.6e-10	1.57e-09
lmo2104	lmo2104	lmo2104	984430	2.71	1.44	1.05e-07	1.62e-06		lmo0994	lmo0994	lmo0994	986414	19.96	4.32	0	0
lmo2104a	hypothetical protein	lmo2104a	16695801	2.28	1.19	2.64e-05	0.00024		lmo0995	hypothetical protein	lmo0995	986413	18.3	4.19	0	0
lmo2105	ferrous iron transport protein B	lmo2105	987907	2.18	1.13	5.24e-06	5.72e-05		lmo0998	hypothetical protein	lmo0998	986409	-2.01	-1.01	1.29e-07	9.25e-07
lmo2112	lmo2112	lmo2112	985597	-2.11	-1.08	0.000115	0.000852		lmo1001	hypothetical protein	lmo1001	986350	-2.38	-1.25	1.24e-08	1.03e-07
lmo2122	maltodextrose utilization protein MalA	lmo2122	984733	2.07	1.05	0.00685	0.03		lmo1007	lmo1007	lmo1007	986404	2.96	1.56	0.000125	0.00052
lmo2123	sugar ABC transporter permease	lmo2123	984732	2.41	1.27	0.0037	0.02		lmo1024	lmo1024	lmo1024	986351	-2.5	-1.32	3.31e-07	2.25e-06
lmo2129	lmo2129	lmo2129	984728	-2.41	-1.27	2.27e-05	0.00021		lmo1025	lmo1025	lmo1025	986700	-2.54	-1.34	1.44e-07	1.03e-06
lmo2158	hypothetical protein	lmo2158	984441	-2.06	-1.04	0.000938	0.00519		lmo1050	hypothetical protein	lmo1050	986511	-3.09	-1.63	1.44e-09	1.33e-08
lmo2173	sigma-54-dependent transcriptional regulator	lmo2173	984670	-6.46	-2.69	0	0		lmo1052	pyruvate dehydrogenase subunit E1 alpha	pdhA	986808	8.18	3.03	6e-15	8.68e-14
lmo2174	hypothetical protein	lmo2174	986302	-2.2	-1.14	0.000611	0.00367		lmo1053	pyruvate dehydrogenase subunit E1 beta	PdhB	984409	6.58	2.72	1.36e-12	1.6e-11
lmo2177	hypothetical protein	lmo2177	984664	-2.09	-1.06	0.000689	0.00403		lmo1054	dihydrolipoamide acetyltransferase	pdhC	986301	5.99	2.58	0	0
lmo2183	ferrichrome ABC transporter permease	lmo2183	984509	5.61	2.49	0.01	0.05		lmo1055	dihydrolipoamide dehydrogenase	PdhD	986542	4.65	2.22	0	0
lmo2187	lmo2187	lmo2187	984649	-7.88	-2.98	0	0		lmo1056	lmo1056	lmo1056	986297	-2.3	-1.2	7.15e-09	5.96e-08
lmo2189	competence protein CoiA	lmo2189	988007	2.97	1.57	6.16e-08	9.9e-07		lmo1060	transcriptional regulator	lmo1060	984788	-2.92	-1.54	1.35e-06	8.33e-06
lmo2199	hypothetical protein	lmo2199	984811	4.02	2.01	0	0		lmo1061	two-component sensor histidine kinase	lmo1061	986289	-2.45	-1.29	4.15e-06	2.37e-05
lmo2200	MarR family transcriptional regulator	lmo2200	984642	4.71	2.24	0	0		lmo1065	hypothetical protein	lmo1065	984607	2.13	1.09	9.4e-07	5.89e-06
lmo2202	3-oxoacyl-ACP synthase	lmo2202	984640	2.72	1.44	1.89e-15	8.24e-14		lmo1070	hypothetical protein	lmo1070	986295	-2.63	-1.39	8.05e-14	1.06e-12
lmo2204	hypothetical protein	lmo2204	986280	2.05	1.04	0.00973	0.04		lmo1071	cell division protein FtsW	lmo1071	986183	-2.27	-1.18	5.55e-09	4.7e-08
lmo2205	phosphoglyceromutase	lmo2205	986282	-2.59	-1.37	2.44e-15	1.05e-13		lmo1074	teichoic acid translocation permease TagG	lmo1074	986267	-2.3	-1.2	5.05e-08	3.8e-07
lmo2211	ferrochelatase	hemH	984632	2.07	1.05	5.98e-06	6.45e-05		lmo1077	teichoic acid biosynthesis protein B	lmo1077	986263	-2.73	-1.45	4.51e-14	6.12e-13
lmo2212	uroporphyrinogen decarboxylase	hemE	984388	2.54	1.34	1.15e-08	2.07e-07		lmo1121	lmo1121	lmo1121	986205	-6.17	-2.63	2.07e-05	0.000104
lmo2213	hypothetical protein	lmo2213	984794	-3.61	-1.85	3.51e-07	4.94e-06		lmo1122	lmo1122	lmo1122	986203	-6.41	-2.68	4.97e-09	4.25e-08
lmo2226	hypothetical protein	lmo2226	985438	2.01	1.01	0.00138	0.00717		lmo1123	lmo1123	lmo1123	986204	-5.11	-2.35	3.3e-05	0.000158
lmo2227	ABC transporter ATP-binding protein	lmo2227	984938	2.74	1.45	5.51e-07	7.35e-06		lmo1124	lmo1124	lmo1124	986198	-4.43	-2.15	5.54e-09	4.7e-08
lmo2230	arsenate reductase	lmo2230	986212	-2.3	-1.2	1.2e-10	3.03e-09		lmo1125	lmo1125	lmo1125	986200	-3.16	-1.66	0.0033	0.01
lmo2234	hypothetical protein	lmo2234	984614	-6.17	-2.62	5.68e-07	7.51e-06		lmo1127	lmo1127	lmo1127	986196	-2.71	-1.44	1.56e-07	1.1e-06
lmo2235	NADH oxidase	lmo2235	984612	-2.87	-1.52	1.74e-05	0.000169		lmo1129	hypothetical protein	lmo1129	986195	-2.44	-1.28	0.00058	0.00207
lmo2236	shikimate 5-dehydrogenase	lmo2236	984609	-2.89	-1.53	0.00408	0.02		lmo1130	transcriptional regulator	lmo1130	985135	-2.61	-1.39	0.00043	0.00159
lmo2237	MFS transporter permease	lmo2237	987939	-2.16	-1.11	0.00717	0.03		lmo1136	internalin	lmo1136	986166	-2.33	-1.22	1.38e-05	7.2e-05
lmo2238	MFS transporter	lmo2238	984611	-6.32	-2.66	0	0		lmo1140	lmo1140	lmo1140	986180	3.87	1.95	0	0
lmo2241	GntR family transcriptional regulator	lmo2241	984595	-3.59	-1.84	3.09e-14	1.12e-12		lmo1157	diol dehydratase-reactivating factor small subunit	lmo1157	986152	2.22	1.15	0.02	0.04
lmo2247	oxidoreductase	lmo2247	984590	-2.42	-1.28	2.08e-08	3.67e-07		lmo1160	PduL protein	lmo1160	986142	2.33	1.22	0.00173	0.00565
lmo2251	amino acid ABC transporter ATP-binding protein	lmo2251	984693	2.6	1.38	3.44e-11	9.56e-10		lmo1161	ethanolamine utilization protein EutJ	lmo1161	986144	2	1	0.01	0.03
lmo2252	aspartate aminotransferase	lmo2252	984582	3.07	1.62	8.97e-12	2.66e-10		lmo1163	carbon dioxide concentrating mechanism protein	lmo1163	986140	2.49	1.32	0.02	0.05
lmo2257	hypothetical protein	lmo2257	985845	3.81	1.93	7.49e-06	7.86e-05		lmo1164	ATP:cob(I)alamin adenosyltransferase PduO	lmo1164	986139	2.02	1.01	0.02	0.04
lmo2261	hypothetical protein	lmo2261	987996	2.31	1.21	4.29e-06	4.75e-05		lmo1167	glycerol uptake facilitator protein	glpF	986131	2.17	1.12	0.00657	0.02
lmo2263	hypothetical protein	lmo2263	984709	2.15	1.1	0.000521	0.00322		lmo1169	threonine-phosphate decarboxylase	cobD_1	986129	-2.36	-1.24	7.94e-05	0.000349
lmo2264	hypothetical protein	lmo2264	984563	2.37	1.25	2.52e-05	0.000232		lmo1170	PduX protein	lmo1170	986128	-3.23	-1.69	3.24e-08	2.5e-07
lmo2265	hypothetical protein	lmo2265	984574	3.16	1.66	5.38e-06	5.85e-05		lmo1172	two-component response regulator	lmo1172	986126	-5.85	-2.55	0	0
lmo2266	hypothetical protein	lmo2266	984562	2.3	1.2	9.47e-09	1.73e-07		lmo1173	two-component sensor histidine kinase	lmo1173	986122	-4.93	-2.3	0	0
lmo2267	ATP-dependent deoxyribonuclease subunit A	lmo2267	985303	2.07	1.05	0.00549	0.02		lmo1188	lmo1188	lmo1188	986112	-2.91	-1.54	8.18e-10	7.69e-09
lmo2269	lmo2269	lmo2269	988009	-2.04	-1.03	0.000164	0.00118		lmo1194	cobalt-precorrin-6A synthase	cbiD	986097	2.42	1.27	0.02	0.04
lmo2270	competence protein ComK	comK'	986337	-2.48	-1.31	0.000557	0.0034		lmo1200	cobalamin biosynthesis protein CbiJ	lmo1200	986085	2.45	1.29	0.01	0.03
lmo2336	fructose-1-phosphate kinase	fruB	984473	-2.81	-1.49	3.11e-15	1.32e-13		lmo1202	cobalt chelatase	cbiK	986086	2.48	1.31	0.01	0.03
lmo2337	DeoR family transcriptional regulator	lmo2337	986688	-2.7	-1.43	1.61e-10	4.02e-09		lmo1208	cobyric acid synthase CbiP	cbiP	986064	2.3	1.2	1.14e-05	5.99e-05
lmo2343	nitrilotriacetate monooxygenase	lmo2343	984458	2.03	1.02	3.33e-05	0.000293		lmo1209	hypothetical protein	lmo1209	986058	2.18	1.12	1.73e-07	1.21e-06
lmo2344	hypothetical protein	lmo2344	984568	2.54	1.34	0.00209	0.01		lmo1216	N-acetylmuramoyl-L-alanine amidase	lmo1216	986054	-2.42	-1.28	5.37e-06	3.03e-05
lmo2345	hypothetical protein	lmo2345	987930	2.56	1.35	1.02e-06	1.3e-05		lmo1223	ABC transporter ATP-binding proteins	lmo1223	986045	-2.1	-1.07	0.000432	0.0016
lmo2346	amino acid ABC transporter ATP-binding protein	lmo2346	984455	2.4	1.26	0.000877	0.00493		lmo1224	hypothetical protein	lmo1224	986043	-2.08	-1.06	7.88e-06	4.31e-05
lmo2347	amino acid ABC transporter permease	lmo2347	984476	2.33	1.22	0.00686	0.03		lmo1227	uracil-DNA glycosylase	lmo1227	986857	-2.66	-1.41	4.66e-07	3.06e-06
lmo2348	amino acid ABC transporter permease	lmo2348	984447	2.81	1.49	0.00301	0.01		lmo1233	thioredoxin	trxA	986032	3.14	1.65	0.00195	0.00627
lmo2352	LysR family transcriptional regulator	lmo2352	986168	2.43	1.28	2.15e-06	2.55e-05		lmo1241	lmo1241	lmo1241	986024	17	4.09	0	0
lmo2360	transmembrane protein	lmo2360	984433	2.58	1.37	7.06e-05	0.000563		lmo1243	lmo1243	lmo1243	986018	-2.8	-1.49	2.09e-11	2.19e-10
lmo2361	hypothetical protein	lmo2361	984432	2.43	1.28	0.000564	0.00342		lmo1257	lmo1257	lmo1257	985997	-9.41	-3.23	0	0
lmo2365	RofA family transcriptional regulator	lmo2365	984424	-2.47	-1.3	0.00107	0.00585		lmo1258	lmo1258	lmo1258	985992	2.77	1.47	3.43e-13	4.28e-12
lmo2366	DeoR family transcriptional regulator	lmo2366	984418	2.76	1.47	2.1e-10	5.18e-09		lmo1261	lmo1261	lmo1261	985993	12.35	3.63	0	0
lmo2389	NADH dehydrogenase	lmo2389	987546	3.26	1.7	1.79e-06	2.18e-05		lmo1293	glycerol-3-phosphate dehydrogenase	glpD	985350	11.87	3.57	0	0
lmo2390	hypothetical thioredoxine reductase	lmo2390	987545	3.31	1.73	1.11e-16	5.22e-15		lmo1294	tRNA delta(2)-isopentenylpyrophosphate transferase	miaA	985128	-2.32	-1.21	2.5e-11	2.61e-10
lmo2392	hypothetical protein	lmo2392	987541	2.48	1.31	0.00623	0.03		lmo1295	host factor-1 protein	hfq	985120	3.22	1.69	0	0
lmo2393	hypothetical protein	lmo2393	987540	2.45	1.29	3.99e-05	0.000342		lmo1298	glutamine synthetase repressor	glnR	985126	-4.46	-2.16	2.99e-07	2.06e-06
lmo2398	hypothetical protein	ltrC	987501	2.13	1.09	2.65e-05	0.00024		lmo1300	arsenic transporter	lmo1300	985130	2.81	1.49	8.49e-13	1.02e-11
lmo2407	lmo2407	lmo2407	987488	-2.35	-1.23	1.6e-06	1.97e-05		lmo1307	lmo1307	lmo1307	987685	-2.19	-1.13	7.02e-05	0.000312
lmo2410	lmo2410	lmo2410	987480	-2.08	-1.06	0.000206	0.00146		lmo1310	hypothetical protein	lmo1310	987688	-2.03	-1.02	1.48e-06	9.05e-06
lmo2423	hypothetical protein	lmo2423	987460	-2.23	-1.16	2.56e-05	0.000234		lmo1312	lmo1312	lmo1312	987691	-2.79	-1.48	0.00106	0.00361
lmo2424	thioredoxin	lmo2424	987459	2.05	1.03	6.08e-06	6.54e-05		lmo1340	hypothetical protein	lmo1340	987724	3.37	1.75	3.33e-16	5.24e-15
lmo2434	glutamate decarboxylase	lmo2434	987419	-2.53	-1.34	1.91e-06	2.29e-05		lmo1364	cold-shock protein	cspL (cspA)	987871	3.1	1.63	3.17e-07	2.17e-06
lmo2435	hypothetical protein	lmo2435	987418	-3.21	-1.68	0.000416	0.00267		lmo1375	aminotripeptidase	lmo1375	987853	4.1	2.04	0	0
lmo2437	lmo2437	lmo2437	987416	-2.15	-1.1	0.000107	0.000814		lmo1376	6-phosphogluconate dehydrogenase	lmo1376	987851	2.32	1.21	0.0061	0.02
lmo2447	transcriptional regulator	lmo2447	987392	-15.46	-3.95	0	0		lmo1380	lmo1380	lmo1380	987834	-2	-1	4.16e-07	2.77e-06
lmo2454	lmo2454	lmo2454	987383	-2.91	-1.54	1.03e-07	1.6e-06		lmo1382	lmo1382	lmo1382	987840	2.11	1.08	9.18e-07	5.77e-06
lmo2465	lmo2465	lmo2465	987367	-2.02	-1.01	0.000528	0.00326		lmo1387	pyrroline-5-carboxylate reductase	lmo1387	987829	2.94	1.56	2.21e-10	2.15e-09
lmo2477	UDP-glucose 4-epimerase	galE	987341	-2.16	-1.11	3.1e-07	4.4e-06		lmo1394	3-ketoacyl-ACP reductase	lmo1394	984737	-2.05	-1.04	1.21e-07	8.7e-07
lmo2478	thioredoxin reductase	trxB	987338	3.37	1.75	5.69e-09	1.1e-07		lmo1395	hypothetical protein	lmo1395	986796	-2.03	-1.02	0.000241	0.000942
lmo2511	hypothetical protein	lmo2511	986743	-2.12	-1.08	1.07e-06	1.36e-05		lmo1396	phosphatidylglycerophosphate synthase	lmo1396	985296	-2.1	-1.07	3.13e-09	2.76e-08
lmo2545	homoserine kinase	thrB	984754	2.51	1.33	3.94e-11	1.06e-09		lmo13a	hypothetical protein	lmo13a	16695796	-4	-2	7.22e-07	4.62e-06
lmo2546	threonine synthase	thrC	986503	2.02	1.02	9.29e-08	1.46e-06		lmo1406	pyruvate formate-lyase	pflB	986171	-5.72	-2.52	8.12e-10	7.66e-09
lmo2557	lipid kinase	lmo2557	987255	3.22	1.69	0	0		lmo1407	pyruvate-formate lyase activating enzyme	pflC	986485	-4.31	-2.11	0	0
lmo2569	peptide ABC transporter substrate-binding protein	lmo2569	987245	3.52	1.82	0	0		lmo1408	hypothetical protein	lmo1408	986462	-2.94	-1.56	5.68e-09	4.8e-08
lmo2575	cation transporter	lmo2575	986612	-6.93	-2.79	0	0		lmo1410	lmo1410	lmo1410	986496	-3.1	-1.63	3.28e-09	2.89e-08
lmo2588	multidrug transporter	lmo2588	987224	3.45	1.79	9.46e-10	1.99e-08		lmo1411	lmo1411	lmo1411	987025	-2.29	-1.19	8.73e-06	4.72e-05
lmo2637	hypothetical protein	lmo2637	987175	-4.04	-2.01	1.19e-07	1.81e-06		lmo1412	modulates DNA topology	lmo1412	986461	-2.39	-1.26	8.89e-09	7.4e-08
lmo2642	lmo2642	lmo2642	984410	-3.9	-1.96	0	0		lmo1413	peptidoglycan binding protein	lmo1413	986489	-2.65	-1.4	4.58e-11	4.72e-10
lmo2644a	hypothetical protein	lmo2644a	16695806	2.75	1.46	0.00015	0.00109		lmo1415	hydroxy-3-methylglutaryl-CoA synthase	lmo1415	986439	2.96	1.56	6e-15	8.68e-14
lmo2646	lmo2646	lmo2646	985483	2.73	1.45	0.000678	0.00399		lmo1419	hypothetical protein	lmo1419	986497	-2.72	-1.45	8.04e-12	8.71e-11
lmo2647	creatinine amidohydrolase	lmo2647	987172	2.55	1.35	0.00351	0.02		lmo1420	UDP-N-acetylenolpyruvoylglucosamine reductase	murB	984666	-3.09	-1.63	4.16e-11	4.31e-10
lmo2648	phosphotriesterase	lmo2648	987171	2.89	1.53	0.000211	0.00149		lmo1423	lmo1423	lmo1423	986759	2.86	1.52	9.27e-13	1.11e-11
lmo2653	elongation factor Tu	tuf	987166	2.26	1.18	0.00491	0.02		lmo1424	manganese transporter	lmo1424	986818	9.54	3.25	0	0
lmo2654	elongation factor G	fus	986619	2.22	1.15	0.00627	0.03		lmo1425	Carnitine ABC transporter permease	opuCD	984750	27.5	4.78	0	0
lmo2669	lmo2669	lmo2669	987156	-3.75	-1.91	0	0		lmo1426	Carnitine ABC transporter substrate-binding protein	opuCC	986463	34.29	5.1	0	0
lmo2673	hypothetical protein	lmo2673	987153	-5.85	-2.55	0	0		lmo1427	Carnitine ABC transporter permease	opuCB	985838	35.27	5.14	0	0
lmo2675	lmo2675	lmo2675	986871	2.77	1.47	2.38e-08	4.08e-07		lmo1428	Carnitine ABC transporter ATP-binding protein	opuCA	987882	45.45	5.51	0	0
lmo2676	DNA polymerase IV	lmo2676	986864	2.95	1.56	3.71e-08	6.3e-07		lmo1432	lmo1432	lmo1432	986495	2.07	1.05	6.44e-08	4.8e-07
lmo2683	PTS cellbiose transporter subunit IIB	lmo2683	987143	-4.4	-2.14	2.21e-08	3.86e-07		lmo1433	glutathione reductase	lmo1433	985502	30.33	4.92	0	0
lmo2684	PTS cellbiose transporter subunit IIC	lmo2684	987141	-2.5	-1.32	3.68e-07	5.15e-06		lmo1439	superoxide dismutase	sod	986791	4.17	2.06	8.24e-10	7.72e-09
lmo2685	PTS cellbiose transporter subunit IIA	lmo2685	987140	-2.5	-1.32	6e-05	0.000486		lmo1452	hypothetical protein	lmo1452	986883	2.38	1.25	2.33e-13	2.96e-12
lmo2686	lmo2686	lmo2686	986869	-10.18	-3.35	0	0		lmo1453	hypothetical protein	lmo1453	984399	2.73	1.45	5.02e-09	4.28e-08
lmo2689	magnesium-translocating P-type ATPase	lmo2689	987136	-2.35	-1.23	0.000895	0.00501		lmo1475	heat-inducible transcription repressor	hrcA	986933	2.12	1.08	1.69e-09	1.54e-08
lmo2690	TetR family transcriptional regulator	lmo2690	987134	-4.9	-2.29	0	0		lmo1482	competence protein ComEC	comEC	987002	-2.24	-1.17	3.5e-07	2.36e-06
lmo2695	dihydroxyacetone kinase subunit DhaK	lmo2695	987129	-2.38	-1.25	3.8e-06	4.3e-05		lmo1483	competence protein ComEB	comEB	986960	-3.1	-1.63	5.19e-10	4.96e-09
lmo2696	dihydroxyacetone kinase	lmo2696	987127	-3.52	-1.82	4.14e-12	1.25e-10		lmo1485	hypothetical protein	lmo1485	987000	-2.13	-1.09	7.59e-06	4.17e-05
lmo2697	PTS mannose transporter subunit IIA	lmo2697	987124	-3.86	-1.95	0	0		lmo1497	uridine kinase	udk	986986	-3.27	-1.71	6.54e-13	7.9e-12
lmo2712	gluconate kinase	lmo2712	987107	2.54	1.35	2.98e-06	3.43e-05		lmo1498	O-methyltransferase	lmo1498	986934	-4.28	-2.1	1.44e-15	2.2e-14
lmo2720	acetate-CoA ligase	lmo2720	987095	8.14	3.02	0	0		lmo1499	hypothetical protein	lmo1499	987003	-2.52	-1.33	4.42e-13	5.4e-12
lmo2727	hypothetical protein	lmo2727	987088	-2.15	-1.1	6.06e-07	7.98e-06		lmo1500	hypothetical protein	lmo1500	986971	-3.55	-1.83	0	0
lmo2749	glutamine amidotransferase	lmo2749	984910	-2.43	-1.28	1.09e-06	1.39e-05		lmo1514	recombination factor protein RarA	lmo1514	987768	2.25	1.17	3.09e-08	2.41e-07
lmo2755	CoA-transferase	lmo2755	986886	2.27	1.18	1.19e-09	2.46e-08		lmo1516	ammonium transporter NrgA	lmo1516	987771	-3.13	-1.65	4.71e-07	3.09e-06
lmo2761	beta-glucosidase	lmo2761	986859	2.1	1.07	4.27e-05	0.00036		lmo1517	nitrogen regulatory PII protein	lmo1517	987779	-2.01	-1.01	0.00948	0.02
lmo2784	transcriptional antiterminator	lmo2784	984381	2.66	1.41	5.4e-10	1.21e-08		lmo1518	lmo1518	lmo1518	987772	-2.26	-1.18	0.000326	0.00125
lmo2785	catalase	kat	984948	2.36	1.24	0.00135	0.00707		lmo1526	hypothetical protein	lmo1526	987791	5.15	2.36	0	0
lmo2802a	hypothetical protein	lmo2802a	16695809	-2.49	-1.32	0.000248	0.00171		lmo1538	glycerol kinase	glpK	987807	7	2.81	0	0
lmo2810	tRNA uridine 5-carboxymethylaminomethyl modification enzyme GidA	gidA	986685	2.04	1.03	5.68e-09	1.1e-07		lmo1539	glycerol transporter	lmo1539	987817	12.3	3.62	0	0
lmo2812	D-alanyl-D-alanine carboxypeptidase	lmo2812	986678	-5.51	-2.46	1.17e-08	2.1e-07		lmo1557	glutamyl-tRNA reductase	hemA	986920	2.38	1.25	5.32e-11	5.47e-10
lmo2826	MFS transporter	lmo2826	985480	-2.21	-1.14	0.00167	0.00847		lmo1573	acetyl-CoA carboxylase subunit beta	accD	986998	-2.34	-1.23	2.99e-13	3.76e-12
lmo2827	MarR family transcriptional regulator	lmo2827	986629	-2.1	-1.07	0.000668	0.00396		lmo1579	alanine dehydrogenase	lmo1579	986945	2.25	1.17	1.74e-08	1.4e-07
lmo2829	nitroreductase	lmo2829	986896	2.51	1.33	5.14e-07	6.92e-06		lmo1580	hypothetical protein	lmo1580	986961	13.38	3.74	1.33e-13	1.73e-12
lmo2830	thioredoxin	lmo2830	984904	3.52	1.81	4.37e-11	1.15e-09		lmo1583	thiol peroxidase	tpx	987763	2.62	1.39	0.00852	0.02
lmor12	16S ribosomal RNA	lmor12	985956	-7.75	-2.95	0.00704	0.03		lmo1585	peptidase	lmo1585	987795	-2.02	-1.01	5.77e-05	0.000261
lmor13	5S ribosomal RNA	lmor13	984423	-10.07	-3.33	0.00324	0.02		lmo1587	ornithine carbamoyltransferase	argF	987773	2.14	1.1	0.02	0.04
lmos09	miscRNA	lmos09	18245114	-2.15	-1.11	0.01	0.04		lmo1588	acetylornithine aminotransferase	argD	984620	3.14	1.65	0.00787	0.02
lmos12	miscRNA	lmos12	18245181	2.52	1.33	0.000494	0.00311		lmo1595	hypothetical protein	lmo1595	986055	2.46	1.3	4e-09	3.46e-08
lmos35	miscRNA	lmos35	18245139	2.32	1.21	5.24e-05	0.000431		lmo1596a	hypothetical protein	lmo1596a	16695814	-2.87	-1.52	6.8e-05	0.000303
lmos38	miscRNA	lmos38	18245189	7.88	2.98	9.76e-14	3.47e-12		lmo1601	general stress protein	lmo1601	985749	3.66	1.87	0.000172	0.000696
lmos45	miscRNA	lmos45	18245141	4.24	2.09	0.00054	0.00332		lmo1602	hypothetical protein	lmo1602	985745	4.5	2.17	0	0
lmos48	miscRNA	lmos48	18245144	-5.3	-2.4	0.01	0.05		lmo1606	DNA translocase	lmo1606	985737	4.5	2.17	7.14e-08	5.31e-07
									lmo1608	hypothetical protein	lmo1608	986017	2.11	1.07	2.08e-06	1.25e-05
									lmo1609	thioredoxin	lmo1609	985740	2.18	1.13	0.000541	0.00195
									lmo1617	multidrug transporter	lmo1617	985727	16.28	4.03	0	0
									lmo1618	MarR family transcriptional regulator	lmo1618	985724	25	4.64	0	0
									lmo1621	hypothetical protein	lmo1621	985720	-3.08	-1.62	7.11e-15	1.01e-13
									lmo1622	hypothetical protein	lmo1622	985726	-2.66	-1.41	1.35e-07	9.6e-07
									lmo1627	tryptophan synthase subunit alpha	trpA	985711	2.84	1.5	8.08e-08	5.96e-07
									lmo1628	tryptophan synthase subunit beta	trpB	985710	2.77	1.47	2.87e-06	1.68e-05
									lmo1629	N-(5'-phosphoribosyl)anthranilate isomerase	trpF	985716	3.46	1.79	2.1e-08	1.67e-07
									lmo1630	indole-3-glycerol phosphate synthase	trpC	985709	2.65	1.41	9.97e-05	0.000425
									lmo1631	anthranilate phosphoribosyltransferase	trpD	985706	2.92	1.55	3.98e-06	2.29e-05
									lmo1632	anthranilate synthase subunit beta	trpG	985715	2.29	1.19	0.00736	0.02
									lmo1633	anthranilate synthase subunit alpha	trpE	985705	3.01	1.59	3.52e-05	0.000167
									lmo1634	bifunctional acetaldehyde-CoA/alcohol dehydrogenase	lmo1634	985703	-6.61	-2.72	0	0
									lmo1641	aconitate hydratase	citB	985689	-2.01	-1.01	2.27e-06	1.35e-05
									lmo1647	1-acylglycerol-3-phosphate O-acyltransferase	lmo1647	985684	-2.63	-1.39	2.68e-09	2.39e-08
									lmo1650	hypothetical protein	lmo1650	985591	3.99	2	0	0
									lmo1665	lmo1665	lmo1665	985662	-2.32	-1.21	1.96e-09	1.78e-08
									lmo1666	Listeria adhesion protein B	lapB	985661	8.28	3.05	0	0
									lmo1671	ABC transporter	lmo1671	985656	-3.55	-1.83	1.9e-10	1.86e-09
									lmo1673	naphthoate synthase	menB	985651	2.06	1.04	1.93e-08	1.54e-07
									lmo1674	prolyl aminopetidase	lmo1674	985652	2.52	1.33	2.09e-10	2.03e-09
									lmo1675	2-succinyl-5-enolpyruvyl-6-hydroxy-3-cyclohexene-1-carboxylate synthase	menD	985654	2.67	1.42	2.61e-12	2.98e-11
									lmo1676	menaquinone-specific isochorismate synthase	menF	985649	2.65	1.41	3.62e-14	4.96e-13
									lmo1678	bifunctional homocysteine S-methyltransferase/5,10-methylenetetrahydrofolate reductase	lmo1678	985643	2.34	1.23	1.04e-05	5.54e-05
									lmo1684	glycerate dehydrogenase	lmo1684	985633	2.5	1.32	1.68e-09	1.54e-08
									lmo1688	enoyl-ACP reductase	lmo1688	985625	2.27	1.18	5.02e-07	3.27e-06
									lmo1694	CDP-abequose synthase	lmo1694	985624	28.4	4.83	0	0
									lmo1697	hypothetical protein	lmo1697	985615	-2.75	-1.46	1.28e-14	1.81e-13
									lmo1699	chemotaxis protein	lmo1699	985617	-2.69	-1.43	4.49e-08	3.39e-07
									lmo1700	lmo1700	lmo1700	985611	-2.69	-1.43	5.04e-07	3.28e-06
									lmo1707	lmo1707	lmo1707	985604	-2.57	-1.36	2.96e-05	0.000144
									lmo1710	flavodoxin	lmo1710	985600	-2.25	-1.17	1.23e-06	7.61e-06
									lmo1713	rod shape-determining protein MreB	lmo1713	985588	2.87	1.52	0	0
									lmo1715	hypothetical protein	lmo1715	985568	-2.02	-1.02	0.00561	0.02
									lmo1726	hypothetical protein	lmo1726	985614	2.02	1.02	9.55e-06	5.13e-05
									lmo1738	amino acid ABC transporter substrate-binding protein	lmo1738	985565	6.22	2.64	7.7e-14	1.03e-12
									lmo1739	amino acid ABC transporter ATP-binding protein	lmo1739	985571	7.24	2.86	4.88e-15	7.21e-14
									lmo1740	amino acid ABC transporter permease	lmo1740	985563	6.54	2.71	7.06e-10	6.72e-09
									lmo1748	lmo1748	lmo1748	986669	-2.46	-1.3	7.61e-11	7.75e-10
									lmo1750	hypothetical protein	lmo1750	985557	-5.13	-2.36	0	0
									lmo1760	geranylgeranylglyceryl phosphate synthase-like protein	lmo1760	985989	-2.11	-1.08	8.97e-08	6.56e-07
									lmo1782	3'-exo-deoxyribonuclease	lmo1782	985950	2.07	1.05	6.53e-06	3.64e-05
									lmo1788	transcriptional regulator	lmo1788	985948	2.81	1.49	3.06e-09	2.71e-08
									lmo1789	hypothetical protein	lmo1789	985940	2.43	1.28	1.47e-06	9.03e-06
									lmo1790	hypothetical protein	lmo1790	985953	2.21	1.14	4.04e-05	0.000188
									lmo1791	lmo1791	lmo1791	985939	2.17	1.12	1.06e-05	5.61e-05
									lmo1792	tRNA (guanine-N(1)-)-methyltransferase	trmD	985936	4.33	2.11	0	0
									lmo1798	hypothetical protein	lmo1798	985932	2.99	1.58	3.25e-07	2.21e-06
									lmo1799	peptidoglycan binding protein	lmo1799	985930	2.96	1.57	4.11e-12	4.6e-11
									lmo1806	acyl carrier protein	acpP	986035	2.68	1.42	0.00079	0.00275
									lmo1815	hypothetical protein	lmo1815	985911	-2.55	-1.35	1.67e-15	2.53e-14
									lmo1830	short-chain dehydrogenase	lmo1830	984389	12.59	3.65	0	0
									lmo1831	orotate phosphoribosyltransferase	pyrE	985882	3.67	1.88	0.000204	0.000809
									lmo1832	orotidine 5'-phosphate decarboxylase	pyrF	985880	4.05	2.02	0.00014	0.000577
									lmo1833	dihydroorotate dehydrogenase	pyrD	985875	3.89	1.96	0.000148	0.000605
									lmo1834	dihydroorotate dehydrogenase electron transfer subunit	pyrDII	985877	3.96	1.99	0.000511	0.00185
									lmo1835	carbamoyl-phosphate synthetase	carB	985876	4.57	2.19	0.000416	0.00155
									lmo1836	carbamoyl phosphate synthase small subunit	pyrAa	985872	4.69	2.23	0.00063	0.00223
									lmo1837	dihydroorotase	pyrC	985870	4.48	2.16	0.00123	0.00414
									lmo1838	aspartate carbamoyltransferase	pyrB	985866	5.12	2.36	0.00396	0.01
									lmo1839	uracil permease	pyrP	985867	4.38	2.13	0.01	0.04
									lmo1844	lipoprotein signal peptidase	lspA	985858	-2.18	-1.12	6.03e-09	5.06e-08
									lmo1846	multidrug transporter	lmo1846	985857	-5.3	-2.41	0	0
									lmo1847	metal ABC transporter	lmo1847	985848	16.43	4.04	0	0
									lmo1848	metal ABC transporter permease	lmo1848	985850	17	4.09	0	0
									lmo1849	metal ABC transporter ATP-binding protein	lmo1849	985851	24.15	4.59	0	0
									lmo1866	hypothetical protein	lmo1866	985829	2.06	1.04	5.11e-05	0.000233
									lmo1867	pyruvate phosphate dikinase	lmo1867	985826	2.4	1.26	3.28e-08	2.52e-07
									lmo1868	hypothetical protein	lmo1868	986136	2.86	1.51	3.22e-10	3.11e-09
									lmo1869	hypothetical protein	lmo1869	985825	2.7	1.43	2.96e-07	2.04e-06
									lmo1870	alkaline phosphatase	lmo1870	985824	-3.99	-2	5.76e-12	6.35e-11
									lmo1882	30S ribosomal protein S14	rpsN_1	985810	3.28	1.71	5.7e-12	6.3e-11
									lmo1884	xanthine permease	lmo1884	985809	-8.35	-3.06	0	0
									lmo1885	xanthine phosphoribosyltransferase	lmo1885	985807	-11.06	-3.47	0	0
									lmo1898	hypothetical protein	lmo1898	985789	-2.39	-1.26	1.89e-12	2.19e-11
									lmo1910	oxidoreductase	lmo1910	985775	2.54	1.34	9.59e-08	6.96e-07
									lmo1911	histidine kinase	lmo1911	985774	2.32	1.22	2.79e-08	2.19e-07
									lmo1912	histidine kinase	lmo1912	985772	2.25	1.17	8.21e-08	6.04e-07
									lmo1917	pyruvate formate-lyase	pflA	985766	-4.38	-2.13	3.33e-16	5.24e-15
									lmo1929	nucleoside diphosphate kinase	ndk	984899	2.72	1.44	2.51e-09	2.26e-08
									lmo1930	heptaprenyl diphosphate synthase subunit II	lmo1930	987985	3.32	1.73	1.48e-09	1.36e-08
									lmo1931	ubiquinone/menaquinone biosynthesis methyltransferase	ubiE	987989	3.78	1.92	8.82e-14	1.16e-12
									lmo1932	heptaprenyl diphosphate synthase subunit I	lmo1932	987988	3.57	1.84	0	0
									lmo1933	GTP cyclohydrolase I	folE	987987	4.39	2.13	0	0
									lmo1952	diaminopimelate decarboxylase	lysA_1	987983	-3.76	-1.91	2.66e-15	4.01e-14
									lmo1957	ferrichrome ABC transporter permease	fhuG	987994	2.48	1.31	4.79e-06	2.71e-05
									lmo1960	ferrichrome ABC transporter ATP-binding protein	fhuC	984884	2.96	1.57	4.82e-07	3.15e-06
									lmo1961	oxidoreductase	lmo1961	984397	2.76	1.47	8.41e-07	5.33e-06
									lmo1962	TetR family transcriptional regulator	lmo1962	987974	-2.6	-1.38	3.18e-08	2.46e-07
									lmo1963	hypothetical protein	lmo1963	987995	-2.88	-1.53	0.000435	0.0016
									lmo1989	isopropylmalate isomerase large subunit	leuC	985310	2.13	1.09	9.28e-06	5e-05
									lmo1990	isopropylmalate isomerase small subunit	leuD	984859	2.09	1.07	0.00139	0.00462
									lmo1992	alpha-acetolactate decarboxylase	lmo1992	986230	4.96	2.31	2.5e-08	1.98e-07
									lmo1993	pyrimidine-nucleoside phosphorylase	pdp	984377	-2.25	-1.17	4.34e-06	2.46e-05
									lmo1994	LacI family transcriptional regulator	lmo1994	984855	-2.69	-1.43	2.24e-12	2.58e-11
									lmo1995	deoxyribose-phosphate aldolase	dra	984581	-2.26	-1.18	1.97e-06	1.19e-05
									lmo1996	DeoR family transcriptional regulator	lmo1996	984762	-2.08	-1.05	8.61e-06	4.66e-05
									lmo2005	oxidoreductase	lmo2005	987954	2.92	1.54	9.09e-11	9.17e-10
									lmo2006	acetolactate synthase	alsS	987957	10.46	3.39	6.88e-15	9.87e-14
									lmo2028	hypothetical protein	lmo2028	987967	3.7	1.89	0	0
									lmo2050	excinuclease ABC subunit A	lmo2050	987929	-3.61	-1.85	2.22e-15	3.36e-14
									lmo2057	protoheme IX farnesyltransferase	ctaB	984806	4.33	2.11	0	0
									lmo2060	hypothetical protein	lmo2060	984801	2.43	1.28	7.31e-08	5.42e-07
									lmo2061	hypothetical protein	lmo2061	987917	2.69	1.43	5.07e-07	3.29e-06
									lmo2062	copper transporter	lmo2062	987920	3.83	1.94	3.33e-15	4.96e-14
									lmo2063	lmo2063	lmo2063	984792	-2.55	-1.35	3.32e-07	2.25e-06
									lmo2065	lmo2065	lmo2065	987927	-2.18	-1.13	1.4e-05	7.26e-05
									lmo2067	bile acid hydrolase	bsh	984795	11.27	3.49	0	0
									lmo2069	co-chaperonin GroES	groES	985586	2.12	1.08	4.21e-07	2.79e-06
									lmo2072	redox-sensing transcriptional repressor Rex	lmo2072	984371	2.07	1.05	3.13e-07	2.14e-06
									lmo2085	peptidoglycan binding protein	lmo2085	984772	14.11	3.82	0	0
									lmo2086	hypothetical protein	lmo2086	987915	-3.13	-1.65	4.9e-12	5.45e-11
									lmo2087	hypothetical protein	lmo2087	984768	-2.34	-1.22	0.00011	0.000463
									lmo2088	transcriptional regulator	lmo2088	984767	-2.13	-1.09	0.000187	0.000748
									lmo2090	argininosuccinate synthase	argG	984368	4.88	2.29	2.22e-16	3.55e-15
									lmo2091	argininosuccinate lyase	argH	987914	2.84	1.5	7.31e-12	7.95e-11
									lmo2093	lmo2093	lmo2093	987913	-2.11	-1.08	0.00872	0.02
									lmo2096	PTS galacticol transporter subunit IIC	lmo2096	987825	2.33	1.22	0.00422	0.01
									lmo2112	lmo2112	lmo2112	985597	-2.41	-1.27	1.11e-05	5.87e-05
									lmo2113	heme peroxidase	lmo2113	984744	2.03	1.02	8.18e-07	5.2e-06
									lmo2122	maltodextrose utilization protein MalA	lmo2122	984733	2.26	1.18	0.000461	0.00169
									lmo2123	sugar ABC transporter permease	lmo2123	984732	2.06	1.04	0.00369	0.01
									lmo2125	sugar ABC transporter substrate-binding protein	lmo2125	987894	2.23	1.16	2.95e-05	0.000144
									lmo2129	lmo2129	lmo2129	984728	-4.2	-2.07	7.77e-16	1.22e-14
									lmo2131	lmo2131	lmo2131	984721	4.88	2.29	1.15e-05	6.07e-05
									lmo2132	lmo2132	lmo2132	985218	6.49	2.7	0	0
									lmo2133	fructose-1,6-biphosphate aldolase type II	lmo2133	984718	2.6	1.38	0.00896	0.02
									lmo2146	LysR family transcriptional regulator	lmo2146	984701	-2.18	-1.12	0.000125	0.00052
									lmo2151	hypothetical protein	lmo2151	984692	-3.32	-1.73	3.65e-08	2.78e-07
									lmo2157	sepA	sepA	987998	27.51	4.78	0	0
									lmo2158	hypothetical protein	lmo2158	984441	15.4	3.94	2.22e-16	3.55e-15
									lmo2160	hypothetical protein	lmo2160	984686	2.29	1.2	0.00551	0.02
									lmo2168	glyoxalase	lmo2168	984676	2.08	1.05	1.49e-05	7.69e-05
									lmo2173	sigma-54-dependent transcriptional regulator	lmo2173	984670	-3.13	-1.65	0	0
									lmo2174	hypothetical protein	lmo2174	986302	3.66	1.87	1.63e-07	1.15e-06
									lmo2177	hypothetical protein	lmo2177	984664	-2.09	-1.06	0.0017	0.00555
									lmo2183	ferrichrome ABC transporter permease	lmo2183	984509	2.99	1.58	0.00124	0.00417
									lmo2185	lmo2185	lmo2185	984803	3.04	1.61	4.25e-06	2.42e-05
									lmo2186	lmo2186	lmo2186	984742	3.31	1.73	0.00195	0.00627
									lmo2187	lmo2187	lmo2187	984649	-17.6	-4.14	0	0
									lmo2189	competence protein CoiA	lmo2189	988007	3.23	1.69	2.66e-08	2.1e-07
									lmo2191	ArsC family transcriptional regulator	spxA	988006	2.25	1.17	0.00459	0.01
									lmo2197	lmo2197	lmo2197	984643	-4.34	-2.12	5.98e-14	8.05e-13
									lmo2199	hypothetical protein	lmo2199	984811	5.44	2.44	0	0
									lmo2200	MarR family transcriptional regulator	lmo2200	984642	6.31	2.66	0	0
									lmo2201	3-oxoacyl-ACP synthase	lmo2201	985883	-2.08	-1.05	1.54e-07	1.09e-06
									lmo2202	3-oxoacyl-ACP synthase	lmo2202	984640	2.94	1.55	0	0
									lmo2205	phosphoglyceromutase	lmo2205	986282	7.35	2.88	6.12e-12	6.73e-11
									lmo2211	ferrochelatase	hemH	984632	2.38	1.25	1.65e-06	1.01e-05
									lmo2212	uroporphyrinogen decarboxylase	hemE	984388	3.18	1.67	1.09e-11	1.17e-10
									lmo2213	hypothetical protein	lmo2213	984794	10.7	3.42	0	0
									lmo2218	lmo2218	lmo2218	985873	-3.45	-1.79	1.53e-09	1.4e-08
									lmo2226	hypothetical protein	lmo2226	985438	2.03	1.02	0.00321	0.00977
									lmo2227	ABC transporter ATP-binding protein	lmo2227	984938	2.32	1.21	7.95e-06	4.34e-05
									lmo2230	arsenate reductase	lmo2230	986212	9.23	3.21	1.16e-10	1.16e-09
									lmo2231	hypothetical protein	lmo2231	984616	16.1	4.01	0	0
									lmo2233	LysR family transcriptional regulator	lmo2233	986617	-2.07	-1.05	3.9e-05	0.000183
									lmo2234	hypothetical protein	lmo2234	984614	-7.94	-2.99	5.16e-08	3.87e-07
									lmo2238	MFS transporter	lmo2238	984611	-9.91	-3.31	0	0
									lmo2239	lmo2239	lmo2239	984668	-2.37	-1.25	1.06e-09	9.93e-09
									lmo2240	ABC transporter ATP-binding protein	lmo2240	984621	-2.61	-1.38	2.49e-09	2.25e-08
									lmo2241	GntR family transcriptional regulator	lmo2241	984595	-3.68	-1.88	2.62e-14	3.62e-13
									lmo2245	hypothetical protein	lmo2245	984591	-2.23	-1.16	4.03e-08	3.05e-07
									lmo2246	hypothetical protein	lmo2246	984843	-2.22	-1.15	2.19e-06	1.31e-05
									lmo2247	oxidoreductase	lmo2247	984590	-2.56	-1.35	2.08e-09	1.88e-08
									lmo2248	hypothetical protein	lmo2248	984588	-3.37	-1.75	0	0
									lmo2249	low-affinity inorganic phosphate transporter	lmo2249	984840	-2.61	-1.38	8.1e-06	4.42e-05
									lmo2251	amino acid ABC transporter ATP-binding protein	lmo2251	984693	2.14	1.1	0.000107	0.000453
									lmo2252	aspartate aminotransferase	lmo2252	984582	2.27	1.18	6.02e-06	3.37e-05
									lmo2254	hypothetical protein	lmo2254	984903	-3.05	-1.61	3.19e-07	2.18e-06
									lmo2255	lmo2255	lmo2255	985217	-2.17	-1.12	2.54e-05	0.000125
									lmo2261	hypothetical protein	lmo2261	987996	2.31	1.21	6.36e-05	0.000286
									lmo2263	hypothetical protein	lmo2263	984709	2.64	1.4	3.37e-09	2.96e-08
									lmo2269	lmo2269	lmo2269	988009	14.35	3.84	0	0
									lmo2270	competence protein ComK	comK'	986337	-11.1	-3.47	0	0
									lmo2279	holin	lmo2279	984545	2.63	1.39	0.02	0.04
									lmo2335	PTS fructose transporter subunit IIABC	fruA	984474	-3.38	-1.76	4.51e-12	5.03e-11
									lmo2336	fructose-1-phosphate kinase	fruB	984473	-6.07	-2.6	0	0
									lmo2337	DeoR family transcriptional regulator	lmo2337	986688	-5.75	-2.52	2.22e-13	2.83e-12
									lmo2358	N-acetylglucosamine-6-phosphate isomerase	lmo2358	984434	3.18	1.67	6.62e-14	8.87e-13
									lmo2360	transmembrane protein	lmo2360	984433	3.4	1.77	0	0
									lmo2361	hypothetical protein	lmo2361	984432	3.49	1.8	7.99e-15	1.14e-13
									lmo2362	amino acid antiporter	lmo2362	984369	7.54	2.91	0	0
									lmo2363	glutamate decarboxylase	lmo2363	985123	3.4	1.77	0	0
									lmo2364	hypothetical protein	lmo2364	984429	-2.27	-1.18	0.00197	0.00631
									lmo2365	RofA family transcriptional regulator	lmo2365	984424	-2.81	-1.49	1.23e-05	6.44e-05
									lmo2366	DeoR family transcriptional regulator	lmo2366	984418	2.75	1.46	1.03e-11	1.11e-10
									lmo2371	ABC transporter permease	lmo2371	984414	2.17	1.12	1.07e-07	7.7e-07
									lmo2372	ABC transporter ATP-binding protein	lmo2372	984413	2.19	1.13	2.91e-07	2.01e-06
									lmo2386	hypothetical protein	lmo2386	987551	2.13	1.09	1.82e-05	9.23e-05
									lmo2387	hypothetical protein	lmo2387	987550	29.78	4.9	0	0
									lmo2389	NADH dehydrogenase	lmo2389	987546	4.8	2.26	4.85e-09	4.16e-08
									lmo2390	hypothetical thioredoxine reductase	lmo2390	987545	3.36	1.75	0	0
									lmo2391	hypothetical protein	lmo2391	987544	19.85	4.31	0	0
									lmo2397	NifU protein	lmo2397	987502	2.01	1	8.72e-05	0.000378
									lmo2398	hypothetical protein	ltrC	987501	6.03	2.59	0	0
									lmo2399	hypothetical protein	lmo2399	987500	4.03	2.01	1.22e-11	1.3e-10
									lmo2423	hypothetical protein	lmo2423	987460	-2.28	-1.19	3.94e-05	0.000184
									lmo2430	ferrichrome ABC transporter permease	lmo2430	987428	2.22	1.15	4.81e-05	0.000221
									lmo2431	ferrichrome ABC transporter substrate-binding protein	lmo2431	987425	2.93	1.55	3.09e-08	2.41e-07
									lmo2434	glutamate decarboxylase	lmo2434	987419	14.93	3.9	0	0
									lmo2435	hypothetical protein	lmo2435	987418	-6.7	-2.74	8.59e-11	8.68e-10
									lmo2436	transcription antiterminator	lmo2436	987417	4.64	2.21	0	0
									lmo2437	lmo2437	lmo2437	987416	-2.17	-1.12	7.31e-06	4.05e-05
									lmo2447	transcriptional regulator	lmo2447	987392	-13.33	-3.74	0	0
									lmo2454	lmo2454	lmo2454	987383	5.31	2.41	0	0
									lmo2460	transcriptional regulator	lmo2460	987376	3.93	1.98	6.62e-05	0.000296
									lmo2463	multidrug transporter	lmo2463	987371	13.4	3.74	0	0
									lmo2464	transcriptional regulator	lmo2464	987370	-2.55	-1.35	1.71e-06	1.04e-05
									lmo2465	lmo2465	lmo2465	987367	-3.11	-1.64	2.79e-12	3.15e-11
									lmo2468	ATP-dependent Clp protease proteolytic subunit	clpP	987364	2.23	1.15	0.00601	0.02
									lmo2469	amino acid transporter	lmo2469	987361	-2.27	-1.18	2.19e-06	1.31e-05
									lmo2471	NADPH dehydrogenase	lmo2471	987354	2.22	1.15	7.47e-10	7.07e-09
									lmo2472	hypothetical protein	lmo2472	987353	2.27	1.18	1.74e-12	2.02e-11
									lmo2478	thioredoxin reductase	trxB	987338	3.64	1.86	0	0
									lmo2484	hypothetical protein	lmo2484	987328	2.89	1.53	1.95e-08	1.55e-07
									lmo2485	hypothetical protein	lmo2485	987327	6.02	2.59	0	0
									lmo2493	ArsR family transcriptional regulator	lmo2493	987893	-2.37	-1.24	3.82e-07	2.56e-06
									lmo2497	phosphate ABC transporter permease	lmo2497	987312	2.14	1.1	0.00932	0.02
									lmo2516	hypothetical protein	lmo2516	987299	-3.8	-1.93	3.11e-15	4.66e-14
									lmo2517	lmo2517	lmo2517	987297	-3.69	-1.88	0	0
									lmo2518	LytR family transcriptional regulator	lmo2518	984500	-2.19	-1.13	2.71e-08	2.13e-07
									lmo2536a	hypothetical protein	lmo2536a	16695804	-2.65	-1.41	1.45e-09	1.34e-08
									lmo2538	uracil phosphoribosyltransferase	upp	986484	-2.15	-1.1	6.6e-05	0.000296
									lmo2544	thymidine kinase	lmo2544	986601	-2.57	-1.36	1.63e-11	1.73e-10
									lmo2549	wall teichoic acid glycosylation protein GtcA	gtcA	984958	-2.13	-1.09	1.33e-08	1.09e-07
									lmo2550	glycosyl transferase	lmo2550	987266	-2.35	-1.23	8.79e-12	9.49e-11
									lmo2557	lipid kinase	lmo2557	987255	2.91	1.54	1.24e-13	1.62e-12
									lmo2569	peptide ABC transporter substrate-binding protein	lmo2569	987245	2.89	1.53	6.09e-09	5.1e-08
									lmo2570	lmo2570	lmo2570	984821	12.13	3.6	0	0
									lmo2571	nicotinamidase	lmo2571	987244	12.27	3.62	0	0
									lmo2572	dihydrofolate reductase subunit A	lmo2572	985849	13.86	3.79	0	0
									lmo2573	zinc-binding dehydrogenase	lmo2573	987242	21.41	4.42	0	0
									lmo2575	cation transporter	lmo2575	986612	-3.2	-1.68	7.15e-11	7.3e-10
									lmo2588	multidrug transporter	lmo2588	987224	4.71	2.24	0	0
									lmo2591	N-acetylmuramoyl-L-alanine amidase	lmo2591	984569	-2.5	-1.32	1.52e-10	1.5e-09
									lmo2602	hypothetical protein	lmo2602	987211	29.87	4.9	0	0
									lmo2603	lmo2603	lmo2603	987210	10.6	3.41	0	0
									lmo2613	50S ribosomal protein L15	rplO	987200	2.15	1.11	7.24e-06	4.01e-05
									lmo2614	50S ribosomal protein L30	rpmD	987199	2.16	1.11	3.49e-05	0.000166
									lmo2635	1,4-dihydroxy-2-naphthoate octaprenyltransferase	lmo2635	987177	-2.1	-1.07	1.9e-09	1.73e-08
									lmo2636	hypothetical protein	lmo2636	987176	-2.52	-1.33	4.64e-13	5.65e-12
									lmo2637	hypothetical protein	lmo2637	987175	-6.27	-2.65	0	0
									lmo2642	lmo2642	lmo2642	984410	-4.54	-2.18	0	0
									lmo2644a	hypothetical protein	lmo2644a	16695806	2.3	1.2	0.000413	0.00154
									lmo2646	lmo2646	lmo2646	985483	2.27	1.18	0.00474	0.01
									lmo2647	creatinine amidohydrolase	lmo2647	987172	4.14	2.05	1.3e-05	6.8e-05
									lmo2648	phosphotriesterase	lmo2648	987171	3.5	1.81	0.000142	0.000582
									lmo2649	PTS system ascorbate transporter subunit IIC	ulaA_2	987170	2.2	1.14	0.000944	0.00325
									lmo2653	elongation factor Tu	tuf	987166	2.17	1.12	0.000103	0.000437
									lmo2654	elongation factor G	fus	986619	2.27	1.18	3.57e-05	0.000169
									lmo2669	lmo2669	lmo2669	987156	-5.13	-2.36	0	0
									lmo2670	hypothetical protein	lmo2670	984436	2.13	1.09	8.36e-05	0.000365
									lmo2671	lmo2671	lmo2671	987155	2.1	1.07	0.00205	0.00656
									lmo2672	AraC family transcriptional regulator	lmo2672	987154	3.33	1.74	1.12e-09	1.04e-08
									lmo2673	hypothetical protein	lmo2673	987153	3.03	1.6	1.01e-12	1.2e-11
									lmo2677	esterase	lmo2677	984427	-2.22	-1.15	3.73e-06	2.16e-05
									lmo2683	PTS cellbiose transporter subunit IIB	lmo2683	987143	2.58	1.37	0.00823	0.02
									lmo2684	PTS cellbiose transporter subunit IIC	lmo2684	987141	14.14	3.82	0	0
									lmo2685	PTS cellbiose transporter subunit IIA	lmo2685	987140	12.79	3.68	0	0
									lmo2686	lmo2686	lmo2686	986869	-13.42	-3.75	0	0
									lmo2690	TetR family transcriptional regulator	lmo2690	987134	-3.56	-1.83	0	0
									lmo2692	lmo2692	lmo2692	984921	2.68	1.42	0.00748	0.02
									lmo2695	dihydroxyacetone kinase subunit DhaK	lmo2695	987129	13.33	3.74	0	0
									lmo2696	dihydroxyacetone kinase	lmo2696	987127	7.82	2.97	0	0
									lmo2697	PTS mannose transporter subunit IIA	lmo2697	987124	6.01	2.59	0	0
									lmo2710	lmo2710	lmo2710	987111	-2.9	-1.54	7.17e-12	7.82e-11
									lmo2712	gluconate kinase	lmo2712	987107	3.46	1.79	8.36e-11	8.48e-10
									lmo2720	acetate-CoA ligase	lmo2720	987095	10.55	3.4	0	0
									lmo2722	MerR family transcripitonal regulator	lmo2722	985237	-2.01	-1	0.000127	0.000529
									lmo2723	hypothetical protein	lmo2723	984820	-3.12	-1.64	1.12e-09	1.04e-08
									lmo2724	hypothetical protein	lmo2724	984922	2.08	1.06	0.000258	0.001
									lmo2727	hypothetical protein	lmo2727	987088	-3.46	-1.79	0	0
									lmo2733	PTS fructose transporter subunit IIABC	lmo2733	987079	2.78	1.48	3.5e-09	3.06e-08
									lmo2734	sugar hydrolase	lmo2734	987078	2.06	1.04	3.02e-05	0.000146
									lmo2739	NAD-dependent deacetylase	lmo2739	987067	2.72	1.44	2.12e-07	1.48e-06
									lmo2740	lmo2740	lmo2740	985142	2.77	1.47	4.14e-07	2.76e-06
									lmo2741	multidrug transporter	lmo2741	987061	2.78	1.48	1.71e-07	1.2e-06
									lmo2743	translaldolase	lmo2743	987056	2.32	1.21	8.12e-05	0.000356
									lmo2748	hypothetical protein	lmo2748	984689	23.89	4.58	0	0
									lmo2749	glutamine amidotransferase	lmo2749	984910	-2.32	-1.21	6.22e-07	4.01e-06
									lmo2750	para-aminobenzoate synthase subunit I	lmo2750	986907	-2.1	-1.07	8.67e-07	5.48e-06
									lmo2751	ABC transporter ATP-binding protein	lmo2751	984683	-2.27	-1.18	1.85e-07	1.29e-06
									lmo2755	CoA-transferase	lmo2755	986886	4.27	2.09	0	0
									lmo2784	transcriptional antiterminator	lmo2784	984381	2.4	1.26	1.15e-07	8.26e-07
									lmo2785	catalase	kat	984948	4.96	2.31	0	0
									lmo2799	PTS mannitol transporter subunit IIBC	lmo2799	986729	2.19	1.13	0.00924	0.02
									lmo2805	hypothetical secreted protein	lmo2805	986900	-2.56	-1.36	0.00195	0.00627
									lmo2810	tRNA uridine 5-carboxymethylaminomethyl modification enzyme GidA	gidA	986685	2.03	1.02	2.78e-06	1.64e-05
									lmo2815	3-ketoacyl-ACP reductase	fabG_3	984831	3.36	1.75	1.91e-11	2.01e-10
									lmo2819	carboxypeptidase	lmo2819	986663	3.61	1.85	0.00299	0.00917
									lmo2822	lmo2822	lmo2822	986651	2.31	1.21	6.13e-08	4.58e-07
									lmo2823	sporulation protein SpoOJ	lmo2823	986643	2.9	1.53	1.11e-15	1.7e-14
									lmo2829	nitroreductase	lmo2829	986896	2.1	1.07	8.8e-05	0.000381
									lmo2830	thioredoxin	lmo2830	984904	2.54	1.34	1.14e-08	9.44e-08
									lmo2835	xylose isomerase	lmo2835	986592	2.31	1.21	0.00522	0.01
									lmo2837	sugar ABC transporter permease	lmo2837	986555	3.48	1.8	0.00124	0.00417
									lmor13	5S ribosomal RNA	lmor13	984423	-39.75	-5.31	1.06e-06	6.61e-06
									lmor16	5S ribosomal RNA	lmor16	984512	-27.8	-4.8	8.39e-06	4.56e-05
									lmos07	miscRNA	lmos07	18245125	-3.01	-1.59	0.000771	0.00269
									lmos12	miscRNA	lmos12	18245181	2.21	1.15	0.000311	0.00119
									lmos13	miscRNA	lmos13	18245182	-2.52	-1.33	3.84e-09	3.33e-08
									lmos23	miscRNA	lmos23	18245128	-5.06	-2.34	0.00416	0.01
									lmos27	miscRNA	lmos27	18245132	5.4	2.43	1.48e-13	1.9e-12
									lmos33	miscRNA	lmos33	18245138	-2.41	-1.27	0.00886	0.02
									lmos38	miscRNA	lmos38	18245189	6.96	2.8	7.9e-14	1.05e-12
									lmos44	miscRNA	lmos44	18245195	-2.16	-1.11	3.53e-05	0.000167
									lmos50	miscRNA	lmos50	18245117	6.1	2.61	0	0
									lmos56	miscRNA	lmos56	18245200	-4.91	-2.29	0.000457	0.00167
									lmos57	miscRNA	lmos57	18245201	-2.3	-1.2	0.00719	0.02
									lmos76	miscRNA	lmos76	18245161	-4.39	-2.13	8.92e-08	6.54e-07
									lmos90	miscRNA	lmos90	18245110	-2.94	-1.55	4.28e-06	2.43e-05
									lmot04	tRNA	lmot04	3167625	-2.4	-1.26	0.01	0.03
									lmot36	tRNA	lmot36	3167601	-4.13	-2.05	0.000173	0.000698
									lmot41	tRNA	lmot41	3167607	-13.82	-3.79	0.00668	0.02
